# Supplementary material for: Predicting Structural Susceptibility of Proteins to Proteolytic Processing
Source: MDPI journal article supplement (doi:10.3390/ijms241310761), 2023-06-28
Supplement: s1 [file s1]

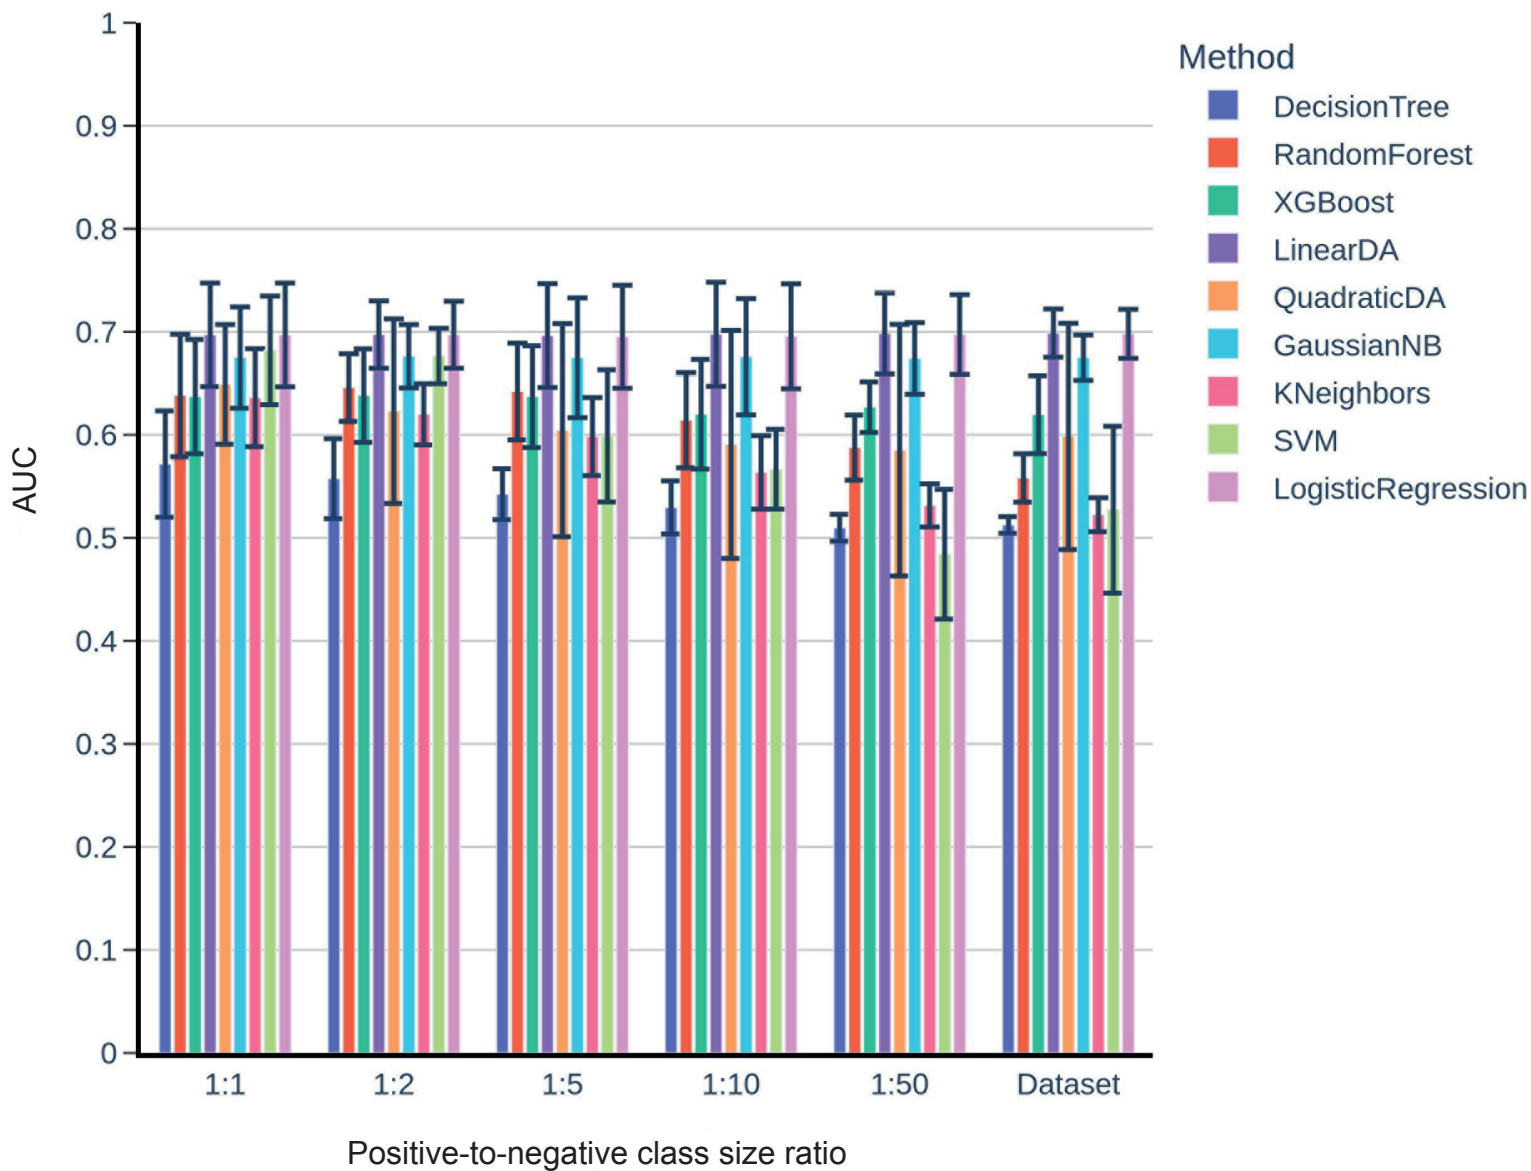

Figure S1. Dependence of the method's prediction quality from the different positive-to-negative class ratios.
