# Supplementary material for: Predicting Structural Susceptibility of Proteins to Proteolytic Processing
Source: Int J Mol Sci. 2023 Jun 28;24(13):10761. doi: 10.3390/ijms241310761 (PMC10342023; doi:10.3390/ijms241310761)
Supplement: Supplementary file 1 [file ijms-24-10761-s001.zip › Supplemental File S1.xlsx]

## Sheet: TrainingSet (CutDB, PDB)
structure	chain	num_AA	AA	init_SS_type	SS_type	bp1	bp2	ACC	bfac	len_loop	SS_B	SS_H	SS_O	is_terminus	SUBSTRATE_name	MEROPS_CODE	is_cut	bfac_N_chain	len_loop_N_chain	ACC_N_com
1AOC	A	1	A	U	O	0	0	118	20.0	20	0	0	1	1	-	-	0	0.044	1.0	0.59
1AOC	A	2	D	U	O	0	0	165	20.0	20	0	0	1	1	-	-	0	0.044	1.0	0.825
1AOC	A	3	T	S	O	0	0	147	20.0	20	0	0	1	1	-	-	0	0.044	1.0	0.735
1AOC	A	4	N	U	O	0	0	116	20.0	20	0	0	1	1	-	-	0	0.044	1.0	0.58
1AOC	A	5	A	U	O	0	0	72	20.11	20	0	0	1	1	-	-	0	0.046	1.0	0.36
1AOC	A	6	P	U	O	0	0	64	23.08	20	0	0	1	1	-	-	0	0.1	1.0	0.32
1AOC	A	7	I	U	O	0	0	61	45.58	20	0	0	1	1	-	-	0	0.512	1.0	0.305
1AOC	A	8	C	U	O	0	0	3	33.12	20	0	0	1	1	-	-	0	0.284	1.0	0.015
1AOC	A	9	L	T	O	0	0	5	27.68	20	0	0	1	1	-	-	0	0.184	1.0	0.025
1AOC	A	10	C	T	O	0	0	48	31.81	20	0	0	1	1	-	-	0	0.26	1.0	0.24
1AOC	A	11	D	U	O	0	0	43	51.6	20	0	0	1	1	-	-	0	0.622	1.0	0.215
1AOC	A	12	E	U	O	0	0	40	23.12	20	0	0	1	1	-	-	0	0.101	1.0	0.2
1AOC	A	13	P	T	O	0	0	126	20.1	20	0	0	1	1	-	-	0	0.046	1.0	0.63
1AOC	A	14	G	T	O	0	0	47	20.0	20	0	0	1	1	-	-	0	0.044	1.0	0.235
1AOC	A	15	V	T	O	0	0	126	20.0	20	0	0	1	0	-	-	0	0.044	1.0	0.63
1AOC	A	16	L	S	O	0	0	52	20.0	20	0	0	1	0	-	-	0	0.044	1.0	0.26
1AOC	A	17	G	U	O	0	0	42	20.0	20	0	0	1	0	-	-	0	0.044	1.0	0.21
1AOC	A	18	R	U	O	0	0	200	20.0	20	0	0	1	0	2344	S01.221	1	0.044	1.0	1.0
1AOC	A	19	T	S	O	0	0	62	20.0	20	0	0	1	0	-	-	0	0.044	1.0	0.31
1AOC	A	20	Q	S	O	0	0	137	20.0	20	0	0	1	0	-	-	0	0.044	1.0	0.685
1AOC	A	21	I	U	O	0	0	127	20.1	20	0	0	1	0	-	-	0	0.046	1.0	0.635
1AOC	A	22	V	U	O	0	0	35	24.58	20	0	0	1	0	-	-	0	0.127	1.0	0.175
1AOC	A	23	T	U	O	0	0	59	51.06	20	0	0	1	0	-	-	0	0.612	1.0	0.295
1AOC	A	24	T	H	H	0	0	105	52.69	0	0	1	0	0	-	-	0	0.642	0.0	0.525
1AOC	A	25	E	H	H	0	0	137	67.01	0	0	1	0	0	-	-	0	0.903	0.0	0.685
1AOC	A	26	I	H	H	0	0	29	55.85	0	0	1	0	0	-	-	0	0.699	0.0	0.145
1AOC	A	27	K	H	H	0	0	81	54.37	0	0	1	0	0	-	-	0	0.672	0.0	0.405
1AOC	A	28	D	H	H	0	0	95	51.01	0	0	1	0	0	-	-	0	0.611	0.0	0.475
1AOC	A	29	K	H	H	0	0	74	51.97	0	0	1	0	0	-	-	0	0.628	0.0	0.37
1AOC	A	30	I	H	H	0	0	8	33.1	0	0	1	0	0	-	-	0	0.283	0.0	0.04
1AOC	A	31	E	H	H	0	0	30	39.8	0	0	1	0	0	-	-	0	0.406	0.0	0.15
1AOC	A	32	K	H	H	0	0	132	49.04	0	0	1	0	0	-	-	0	0.575	0.0	0.66
1AOC	A	33	A	H	H	0	0	20	30.68	0	0	1	0	0	-	-	0	0.239	0.0	0.1
1AOC	A	34	V	H	H	0	0	0	26.29	0	0	1	0	0	-	-	0	0.159	0.0	0.0
1AOC	A	35	E	H	H	0	0	56	35.56	0	0	1	0	0	-	-	0	0.328	0.0	0.28
1AOC	A	36	A	H	H	0	0	32	33.87	0	0	1	0	0	-	-	0	0.297	0.0	0.16
1AOC	A	37	V	H	H	0	0	8	30.8	0	0	1	0	0	-	-	0	0.241	0.0	0.04
1AOC	A	38	A	H	H	0	0	19	35.74	0	0	1	0	0	-	-	0	0.332	0.0	0.095
1AOC	A	39	Q	H	H	0	0	145	54.2	0	0	1	0	0	-	-	0	0.669	0.0	0.725
1AOC	A	40	E	T	O	0	0	144	54.02	8	0	0	1	0	-	-	0	0.666	0.4	0.72
1AOC	A	41	S	T	O	0	0	19	51.58	8	0	0	1	0	-	-	0	0.621	0.4	0.095
1AOC	A	42	G	U	O	0	0	47	27.58	8	0	0	1	0	-	-	0	0.182	0.4	0.235
1AOC	A	43	V	S	O	0	0	106	20.14	8	0	0	1	0	-	-	0	0.046	0.4	0.53
1AOC	A	44	S	S	O	0	0	61	20.0	8	0	0	1	0	-	-	0	0.044	0.4	0.305
1AOC	A	45	G	T	O	0	0	34	20.0	8	0	0	1	0	-	-	0	0.044	0.4	0.17
1AOC	A	46	R	T	O	0	0	200	20.11	8	0	0	1	0	2344	S01.221	1	0.046	0.4	1.0
1AOC	A	47	G	S	O	0	0	36	26.78	8	0	0	1	0	-	-	0	0.168	0.4	0.18
1AOC	A	48	F	G	H	0	0	33	52.55	0	0	1	0	0	-	-	0	0.639	0.0	0.165
1AOC	A	49	S	G	H	0	0	49	59.21	0	0	1	0	0	-	-	0	0.761	0.0	0.245
1AOC	A	50	I	G	H	0	0	35	52.08	0	0	1	0	0	-	-	0	0.63	0.0	0.175
1AOC	A	51	F	T	O	0	0	2	40.93	4	0	0	1	0	-	-	0	0.426	0.2	0.01
1AOC	A	52	S	T	O	0	0	39	56.96	4	0	0	1	0	-	-	0	0.72	0.2	0.195
1AOC	A	53	H	T	O	0	0	89	66.52	4	0	0	1	0	-	-	0	0.894	0.2	0.445
1AOC	A	54	H	S	O	0	0	49	41.24	4	0	0	1	0	-	-	0	0.432	0.2	0.245
1AOC	A	55	P	H	H	0	0	81	38.87	0	0	1	0	0	-	-	0	0.389	0.0	0.405
1AOC	A	56	V	H	H	0	0	21	29.36	0	0	1	0	0	-	-	0	0.215	0.0	0.105
1AOC	A	57	F	H	H	0	0	0	24.94	0	0	1	0	0	-	-	0	0.134	0.0	0.0
1AOC	A	58	R	H	H	0	0	133	46.37	0	0	1	0	0	-	-	0	0.526	0.0	0.665
1AOC	A	59	E	H	H	0	0	127	30.08	0	0	1	0	0	-	-	0	0.228	0.0	0.635
1AOC	A	60	C	H	H	0	0	9	20.7	0	0	1	0	0	-	-	0	0.057	0.0	0.045
1AOC	A	61	G	U	O	0	0	0	21.61	9	0	0	1	0	-	-	0	0.073	0.45	0.0
1AOC	A	62	K	U	O	0	0	114	26.81	9	0	0	1	0	-	-	0	0.168	0.45	0.57
1AOC	A	63	Y	U	O	0	0	62	26.54	9	0	0	1	0	-	-	0	0.163	0.45	0.31
1AOC	A	64	E	B	O	1	0	56	29.99	9	0	0	1	0	-	-	0	0.226	0.45	0.28
1AOC	A	65	C	T	O	0	0	15	21.8	9	0	0	1	0	-	-	0	0.077	0.45	0.075
1AOC	A	66	R	T	O	0	0	162	46.9	9	0	0	1	0	-	-	0	0.536	0.45	0.81
1AOC	A	67	T	T	O	0	0	81	27.05	9	0	0	1	0	-	-	0	0.173	0.45	0.405
1AOC	A	68	V	U	O	0	0	16	23.95	9	0	0	1	0	-	-	0	0.116	0.45	0.08
1AOC	A	69	R	U	O	0	0	147	36.75	9	0	0	1	0	-	-	0	0.35	0.45	0.735
1AOC	A	70	P	G	H	0	0	34	26.62	0	0	1	0	0	-	-	0	0.165	0.0	0.17
1AOC	A	71	E	G	H	0	0	49	33.79	0	0	1	0	0	-	-	0	0.296	0.0	0.245
1AOC	A	72	H	G	H	0	0	84	27.92	0	0	1	0	0	-	-	0	0.189	0.0	0.42
1AOC	A	73	S	G	H	0	0	1	21.78	0	0	1	0	0	-	-	0	0.076	0.0	0.005
1AOC	A	74	R	S	O	0	0	43	29.7	1	0	0	1	0	-	-	0	0.221	0.05	0.215
1AOC	A	75	C	G	H	0	0	10	21.34	0	0	1	0	0	-	-	0	0.068	0.0	0.05
1AOC	A	76	Y	G	H	0	0	73	31.86	0	0	1	0	0	-	-	0	0.261	0.0	0.365
1AOC	A	77	N	G	H	0	0	72	26.55	0	0	1	0	0	-	-	0	0.163	0.0	0.36
1AOC	A	78	F	S	O	0	0	17	22.53	12	0	0	1	0	-	-	0	0.09	0.6	0.085
1AOC	A	79	P	T	O	0	0	91	23.18	12	0	0	1	0	-	-	0	0.102	0.6	0.455
1AOC	A	80	P	T	O	0	0	103	29.21	12	0	0	1	0	-	-	0	0.212	0.6	0.515
1AOC	A	81	F	U	O	0	0	124	26.37	12	0	0	1	0	-	-	0	0.16	0.6	0.62
1AOC	A	82	T	U	O	0	0	85	36.52	12	0	0	1	0	-	-	0	0.346	0.6	0.425
1AOC	A	83	H	U	O	0	0	136	39.4	12	0	0	1	0	-	-	0	0.399	0.6	0.68
1AOC	A	84	F	U	O	0	0	42	35.87	12	0	0	1	0	-	-	0	0.334	0.6	0.21
1AOC	A	85	K	S	O	0	0	200	57.74	12	0	0	1	0	-	-	0	0.734	0.6	1.0
1AOC	A	86	S	S	O	0	0	71	45.5	12	0	0	1	0	-	-	0	0.51	0.6	0.355
1AOC	A	87	E	B	O	1	0	59	40.06	12	0	0	1	0	-	-	0	0.411	0.6	0.295
1AOC	A	88	C	U	O	0	0	11	34.04	12	0	0	1	0	-	-	0	0.3	0.6	0.055
1AOC	A	89	P	U	O	0	0	64	35.81	12	0	0	1	0	-	-	0	0.333	0.6	0.32
1AOC	A	90	V	E	B	1	0	20	27.48	0	1	0	0	0	-	-	0	0.181	0.0	0.1
1AOC	A	91	S	E	B	1	0	28	26.38	0	1	0	0	0	-	-	0	0.16	0.0	0.14
1AOC	A	92	T	E	B	1	0	58	29.52	0	1	0	0	0	-	-	0	0.218	0.0	0.29
1AOC	A	93	R	E	B	1	0	100	49.52	0	1	0	0	0	-	-	0	0.584	0.0	0.5
1AOC	A	94	D	U	O	0	0	65	28.04	5	0	0	1	0	-	-	0	0.191	0.25	0.325
1AOC	A	95	C	U	O	0	0	3	21.67	5	0	0	1	0	-	-	0	0.074	0.25	0.015
1AOC	A	96	E	U	O	0	0	78	30.69	5	0	0	1	0	-	-	0	0.239	0.25	0.39
1AOC	A	97	P	U	O	0	0	11	24.49	5	0	0	1	0	-	-	0	0.126	0.25	0.055
1AOC	A	98	V	S	O	0	0	45	27.96	5	0	0	1	0	-	-	0	0.189	0.25	0.225
1AOC	A	99	F	E	B	1	0	45	42.9	0	1	0	0	0	-	-	0	0.463	0.0	0.225
1AOC	A	100	G	E	B	1	0	4	29.62	0	1	0	0	0	-	-	0	0.22	0.0	0.02
1AOC	A	101	Y	E	B	1	0	75	41.33	0	1	0	0	0	-	-	0	0.434	0.0	0.375
1AOC	A	102	T	B	O	1	0	6	29.51	5	0	0	1	0	-	-	0	0.218	0.25	0.03
1AOC	A	103	V	T	O	0	0	53	37.61	5	0	0	1	0	-	-	0	0.366	0.25	0.265
1AOC	A	104	A	T	O	0	0	78	44.04	5	0	0	1	0	-	-	0	0.483	0.25	0.39
1AOC	A	105	G	U	O	0	0	50	50.32	5	0	0	1	0	-	-	0	0.598	0.25	0.25
1AOC	A	106	E	U	O	0	0	75	59.59	5	0	0	1	0	-	-	0	0.768	0.25	0.375
1AOC	A	107	F	E	B	1	0	100	40.85	0	1	0	0	0	-	-	0	0.425	0.0	0.5
1AOC	A	108	R	E	B	1	0	73	40.28	0	1	0	0	0	-	-	0	0.415	0.0	0.365
1AOC	A	109	V	E	B	1	1	14	32.69	0	1	0	0	0	-	-	0	0.276	0.0	0.07
1AOC	A	110	I	E	B	0	1	1	24.9	0	1	0	0	0	-	-	0	0.133	0.0	0.005
1AOC	A	111	V	U	O	0	0	0	24.82	13	0	0	1	0	-	-	0	0.132	0.65	0.0
1AOC	A	112	Q	U	O	0	0	16	23.13	13	0	0	1	0	-	-	0	0.101	0.65	0.08
1AOC	A	113	A	B	O	1	0	0	21.2	13	0	0	1	0	-	-	0	0.066	0.65	0.0
1AOC	A	114	P	T	O	0	0	72	21.7	13	0	0	1	0	-	-	0	0.075	0.65	0.36
1AOC	A	115	R	T	O	0	0	200	35.94	13	0	0	1	0	-	-	0	0.335	0.65	1.0
1AOC	A	116	A	T	O	0	0	22	27.38	13	0	0	1	0	-	-	0	0.179	0.65	0.11
1AOC	A	117	G	T	O	0	0	33	23.2	13	0	0	1	0	-	-	0	0.102	0.65	0.165
1AOC	A	118	F	B	O	1	0	3	25.49	13	0	0	1	0	-	-	0	0.144	0.65	0.015
1AOC	A	119	R	U	O	0	0	58	22.65	13	0	0	1	0	-	-	0	0.092	0.65	0.29
1AOC	A	120	Q	B	O	1	0	1	20.05	13	0	0	1	0	-	-	0	0.045	0.65	0.005
1AOC	A	121	C	U	O	0	0	1	20.63	13	0	0	1	0	-	-	0	0.055	0.65	0.005
1AOC	A	122	V	U	O	0	0	1	18.74	13	0	0	1	0	-	-	0	0.021	0.65	0.005
1AOC	A	123	W	U	O	0	0	64	22.35	13	0	0	1	0	-	-	0	0.087	0.65	0.32
1AOC	A	124	Q	E	B	1	0	9	22.27	0	1	0	0	0	-	-	0	0.085	0.0	0.045
1AOC	A	125	H	E	B	1	0	3	20.77	0	1	0	0	0	-	-	0	0.058	0.0	0.015
1AOC	A	126	K	E	B	1	0	44	39.22	0	1	0	0	0	-	-	0	0.395	0.0	0.22
1AOC	A	127	C	E	B	1	0	17	27.98	0	1	0	0	0	-	-	0	0.19	0.0	0.085
1AOC	A	128	R	T	O	0	0	136	36.47	11	0	0	1	0	-	-	0	0.345	0.55	0.68
1AOC	A	129	F	T	O	0	0	136	42.61	11	0	0	1	0	-	-	0	0.457	0.55	0.68
1AOC	A	130	G	S	O	0	0	40	50.62	11	0	0	1	0	-	-	0	0.604	0.55	0.2
1AOC	A	131	S	S	O	0	0	85	61.72	11	0	0	1	0	-	-	0	0.807	0.55	0.425
1AOC	A	132	N	U	O	0	0	66	52.84	11	0	0	1	0	-	-	0	0.644	0.55	0.33
1AOC	A	133	S	B	O	1	0	104	53.68	11	0	0	1	0	-	-	0	0.66	0.55	0.52
1AOC	A	134	C	U	O	0	0	47	47.88	11	0	0	1	0	-	-	0	0.554	0.55	0.235
1AOC	A	135	G	S	O	0	0	38	65.06	11	0	0	1	0	-	-	0	0.868	0.55	0.19
1AOC	A	136	Y	S	O	0	0	200	67.53	11	0	0	1	0	-	-	0	0.913	0.55	1.0
1AOC	A	137	N	S	O	0	0	113	69.4	11	0	0	1	0	-	-	0	0.947	0.55	0.565
1AOC	A	138	G	U	O	0	0	5	56.89	11	0	0	1	0	-	-	0	0.718	0.55	0.025
1AOC	A	139	R	E	B	1	1	101	55.53	0	1	0	0	0	-	-	0	0.693	0.0	0.505
1AOC	A	140	C	E	B	0	1	1	32.77	0	1	0	0	0	-	-	0	0.277	0.0	0.005
1AOC	A	141	T	U	O	0	0	41	32.32	2	0	0	1	0	-	-	0	0.269	0.1	0.205
1AOC	A	142	Q	U	O	0	0	28	23.68	2	0	0	1	0	-	-	0	0.111	0.1	0.14
1AOC	A	143	Q	E	B	0	1	59	34.62	0	1	0	0	0	-	-	0	0.311	0.0	0.295
1AOC	A	144	R	E	B	0	1	93	31.38	0	1	0	0	0	-	-	0	0.252	0.0	0.465
1AOC	A	145	S	E	B	0	1	27	23.03	0	1	0	0	0	-	-	0	0.099	0.0	0.135
1AOC	A	146	V	E	B	0	1	64	20.98	0	1	0	0	0	-	-	0	0.062	0.0	0.32
1AOC	A	147	V	E	B	0	1	3	20.88	0	1	0	0	0	-	-	0	0.06	0.0	0.015
1AOC	A	148	R	E	B	0	1	100	22.63	0	1	0	0	0	-	-	0	0.092	0.0	0.5
1AOC	A	149	L	E	B	0	1	2	19.09	0	1	0	0	0	-	-	0	0.027	0.0	0.01
1AOC	A	150	V	E	B	0	1	0	21.18	0	1	0	0	0	-	-	0	0.065	0.0	0.0
1AOC	A	151	T	E	B	1	1	3	27.48	0	1	0	0	0	-	-	0	0.181	0.0	0.015
1AOC	A	152	Y	E	B	1	1	9	47.38	0	1	0	0	0	-	-	0	0.544	0.0	0.045
1AOC	A	153	N	E	B	0	1	60	56.37	0	1	0	0	0	-	-	0	0.709	0.0	0.3
1AOC	A	154	L	T	O	0	0	74	64.26	4	0	0	1	0	-	-	0	0.853	0.2	0.37
1AOC	A	155	E	T	O	0	0	174	71.89	4	0	0	1	0	-	-	0	0.993	0.2	0.87
1AOC	A	156	K	T	O	0	0	164	58.37	4	0	0	1	0	-	-	0	0.745	0.2	0.82
1AOC	A	157	D	T	O	0	0	92	66.44	4	0	0	1	0	-	-	0	0.893	0.2	0.46
1AOC	A	158	G	E	B	0	1	18	46.45	0	1	0	0	1	-	-	0	0.527	0.0	0.09
1AOC	A	159	F	E	B	0	1	23	29.34	0	1	0	0	1	-	-	0	0.215	0.0	0.115
1AOC	A	160	L	E	B	0	1	89	34.94	0	1	0	0	1	-	-	0	0.317	0.0	0.445
1AOC	A	161	C	E	B	0	1	11	25.81	0	1	0	0	1	-	-	0	0.15	0.0	0.055
1AOC	A	162	E	E	B	0	1	28	33.93	0	1	0	0	1	-	-	0	0.298	0.0	0.14
1AOC	A	163	S	E	B	0	1	30	22.64	0	1	0	0	1	-	-	0	0.092	0.0	0.15
1AOC	A	164	F	E	B	1	1	1	17.61	0	1	0	0	1	-	-	0	0.0	0.0	0.005
1AOC	A	165	R	E	B	0	1	79	34.34	0	1	0	0	1	-	-	0	0.306	0.0	0.395
1AOC	A	166	T	E	B	0	1	0	22.51	0	1	0	0	1	-	-	0	0.09	0.0	0.0
1AOC	A	167	C	E	B	0	1	1	23.08	0	1	0	0	1	-	-	0	0.1	0.0	0.005
1AOC	A	168	C	E	B	0	0	1	19.49	0	1	0	0	1	-	-	0	0.034	0.0	0.005
1AOC	A	169	G	E	B	0	1	0	21.3	0	1	0	0	1	-	-	0	0.067	0.0	0.0
1AOC	A	170	C	U	O	0	0	0	24.93	2	0	0	1	1	-	-	0	0.134	0.1	0.0
1AOC	A	171	P	B	O	1	0	2	28.3	2	0	0	1	1	-	-	0	0.196	0.1	0.01
1AOC	A	172	C	E	B	1	0	24	40.46	0	1	0	0	1	-	-	0	0.418	0.0	0.12
1AOC	A	173	R	E	B	1	0	114	61.52	0	1	0	0	1	-	-	0	0.803	0.0	0.57
1AOC	A	174	S	U	O	0	0	96	69.5	2	0	0	1	1	-	-	0	0.949	0.1	0.48
1AOC	A	175	F	U	O	0	0	141	72.29	2	0	0	1	1	-	-	0	1.0	0.1	0.705
1AU1	A	1	M	U	O	0	0	76	35.66	2	0	0	1	1	-	-	0	0.288	0.167	0.38
1AU1	A	2	S	U	O	0	0	38	32.59	2	0	0	1	1	-	-	0	0.247	0.167	0.19
1AU1	A	3	Y	H	H	0	0	8	34.32	0	0	1	0	1	-	-	0	0.27	0.0	0.04
1AU1	A	4	N	H	H	0	0	85	61.67	0	0	1	0	1	2566	M10.004	1	0.637	0.0	0.425
1AU1	A	5	L	H	H	0	0	81	35.64	0	0	1	0	1	-	-	0	0.288	0.0	0.405
1AU1	A	6	L	H	H	0	0	1	27.75	0	0	1	0	1	-	-	0	0.182	0.0	0.005
1AU1	A	7	G	H	H	0	0	0	33.53	0	0	1	0	1	-	-	0	0.26	0.0	0.0
1AU1	A	8	F	H	H	0	0	114	54.49	0	0	1	0	1	2566	M10.004	1	0.541	0.0	0.57
1AU1	A	9	L	H	H	0	0	54	18.22	0	0	1	0	1	2566	M10.004	1	0.054	0.0	0.27
1AU1	A	10	Q	H	H	0	0	2	23.13	0	0	1	0	1	-	-	0	0.12	0.0	0.01
1AU1	A	11	R	H	H	0	0	82	24.58	0	0	1	0	1	-	-	0	0.139	0.0	0.41
1AU1	A	12	S	H	H	0	0	65	29.52	0	0	1	0	1	-	-	0	0.206	0.0	0.325
1AU1	A	13	S	H	H	0	0	14	25.98	0	0	1	0	1	-	-	0	0.158	0.0	0.07
1AU1	A	14	N	H	H	0	0	0	23.23	0	0	1	0	1	-	-	0	0.121	0.0	0.0
1AU1	A	15	F	H	H	0	0	139	35.06	0	0	1	0	1	-	-	0	0.28	0.0	0.695
1AU1	A	16	Q	H	H	0	0	78	38.62	0	0	1	0	1	-	-	0	0.328	0.0	0.39
1AU1	A	17	C	H	H	0	0	0	17.97	0	0	1	0	1	-	-	0	0.051	0.0	0.0
1AU1	A	18	Q	H	H	0	0	47	19.18	0	0	1	0	1	-	-	0	0.067	0.0	0.235
1AU1	A	19	K	H	H	0	0	118	27.53	0	0	1	0	1	-	-	0	0.179	0.0	0.59
1AU1	A	20	L	H	H	0	0	9	16.13	0	0	1	0	1	-	-	0	0.026	0.0	0.045
1AU1	A	21	L	H	H	0	0	0	20.77	0	0	1	0	1	-	-	0	0.088	0.0	0.0
1AU1	A	22	W	T	O	0	0	169	17.43	8	0	0	1	1	-	-	0	0.043	0.667	0.845
1AU1	A	23	Q	T	O	0	0	100	34.83	8	0	0	1	1	-	-	0	0.277	0.667	0.5
1AU1	A	24	L	S	O	0	0	21	29.11	8	0	0	1	0	-	-	0	0.2	0.667	0.105
1AU1	A	25	N	U	O	0	0	53	76.97	8	0	0	1	0	-	-	0	0.843	0.667	0.265
1AU1	A	26	G	U	O	0	0	53	67.03	8	0	0	1	0	-	-	0	0.709	0.667	0.265
1AU1	A	27	R	U	O	0	0	195	51.9	8	0	0	1	0	-	-	0	0.506	0.667	0.975
1AU1	A	28	L	U	O	0	0	50	70.11	8	0	0	1	0	-	-	0	0.751	0.667	0.25
1AU1	A	29	E	S	O	0	0	102	46.2	8	0	0	1	0	-	-	0	0.43	0.667	0.51
1AU1	A	30	Y	G	H	0	0	175	76.85	0	0	1	0	0	-	-	0	0.841	0.0	0.875
1AU1	A	31	C	G	H	0	0	4	37.26	0	0	1	0	0	-	-	0	0.31	0.0	0.02
1AU1	A	32	L	G	H	0	0	56	34.87	0	0	1	0	0	-	-	0	0.278	0.0	0.28
1AU1	A	33	K	G	H	0	0	120	38.8	0	0	1	0	0	-	-	0	0.33	0.0	0.6
1AU1	A	34	D	G	H	0	0	15	36.97	0	0	1	0	0	-	-	0	0.306	0.0	0.075
1AU1	A	35	R	U	O	0	0	173	66.35	7	0	0	1	0	-	-	0	0.7	0.583	0.865
1AU1	A	36	M	U	O	0	0	87	33.82	7	0	0	1	0	-	-	0	0.263	0.583	0.435
1AU1	A	37	N	U	O	0	0	128	28.09	7	0	0	1	0	-	-	0	0.187	0.583	0.64
1AU1	A	38	F	U	O	0	0	1	20.59	7	0	0	1	0	-	-	0	0.086	0.583	0.005
1AU1	A	39	D	U	O	0	0	110	23.09	7	0	0	1	0	-	-	0	0.119	0.583	0.55
1AU1	A	40	I	U	O	0	0	5	21.2	7	0	0	1	0	-	-	0	0.094	0.583	0.025
1AU1	A	41	P	U	O	0	0	11	19.68	7	0	0	1	0	-	-	0	0.074	0.583	0.055
1AU1	A	42	E	H	H	0	0	132	39.69	0	0	1	0	0	-	-	0	0.342	0.0	0.66
1AU1	A	43	E	H	H	0	0	41	17.16	0	0	1	0	0	-	-	0	0.04	0.0	0.205
1AU1	A	44	I	H	H	0	0	0	21.04	0	0	1	0	0	-	-	0	0.092	0.0	0.0
1AU1	A	45	K	H	H	0	0	64	25.8	0	0	1	0	0	-	-	0	0.156	0.0	0.32
1AU1	A	46	Q	H	H	0	0	114	48.13	0	0	1	0	0	-	-	0	0.456	0.0	0.57
1AU1	A	47	L	U	O	0	0	68	22.11	5	0	0	1	0	-	-	0	0.106	0.417	0.34
1AU1	A	48	Q	U	O	0	0	121	37.16	5	0	0	1	0	-	-	0	0.308	0.417	0.605
1AU1	A	49	Q	U	O	0	0	163	66.78	5	0	0	1	0	-	-	0	0.706	0.417	0.815
1AU1	A	50	F	U	O	0	0	16	27.47	5	0	0	1	0	-	-	0	0.178	0.417	0.08
1AU1	A	51	Q	U	O	0	0	125	63.24	5	0	0	1	0	-	-	0	0.658	0.417	0.625
1AU1	A	52	K	H	H	0	0	91	54.07	0	0	1	0	0	-	-	0	0.535	0.0	0.455
1AU1	A	53	E	H	H	0	0	24	41.36	0	0	1	0	0	-	-	0	0.365	0.0	0.12
1AU1	A	54	D	H	H	0	0	23	53.36	0	0	1	0	0	-	-	0	0.526	0.0	0.115
1AU1	A	55	A	H	H	0	0	0	20.11	0	0	1	0	0	-	-	0	0.079	0.0	0.0
1AU1	A	56	A	H	H	0	0	0	22.1	0	0	1	0	0	-	-	0	0.106	0.0	0.0
1AU1	A	57	L	H	H	0	0	27	22.72	0	0	1	0	0	-	-	0	0.114	0.0	0.135
1AU1	A	58	T	H	H	0	0	0	19.82	0	0	1	0	0	-	-	0	0.076	0.0	0.0
1AU1	A	59	I	H	H	0	0	0	20.41	0	0	1	0	0	-	-	0	0.083	0.0	0.0
1AU1	A	60	Y	H	H	0	0	42	20.18	0	0	1	0	0	-	-	0	0.08	0.0	0.21
1AU1	A	61	E	H	H	0	0	10	29.14	0	0	1	0	0	-	-	0	0.201	0.0	0.05
1AU1	A	62	M	H	H	0	0	0	16.2	0	0	1	0	0	-	-	0	0.027	0.0	0.0
1AU1	A	63	L	H	H	0	0	0	14.19	0	0	1	0	0	-	-	0	0.0	0.0	0.0
1AU1	A	64	Q	H	H	0	0	67	24.2	0	0	1	0	0	-	-	0	0.134	0.0	0.335
1AU1	A	65	N	H	H	0	0	22	18.15	0	0	1	0	0	-	-	0	0.053	0.0	0.11
1AU1	A	66	I	H	H	0	0	2	17.59	0	0	1	0	0	-	-	0	0.046	0.0	0.01
1AU1	A	67	F	H	H	0	0	52	22.12	0	0	1	0	0	-	-	0	0.106	0.0	0.26
1AU1	A	68	A	H	H	0	0	33	18.26	0	0	1	0	0	-	-	0	0.055	0.0	0.165
1AU1	A	69	I	H	H	0	0	0	16.94	0	0	1	0	0	-	-	0	0.037	0.0	0.0
1AU1	A	70	F	H	H	0	0	5	21.98	0	0	1	0	0	-	-	0	0.105	0.0	0.025
1AU1	A	71	R	T	O	0	0	187	30.43	4	0	0	1	0	-	-	0	0.218	0.333	0.935
1AU1	A	72	Q	S	O	0	0	66	35.49	4	0	0	1	0	-	-	0	0.286	0.333	0.33
1AU1	A	73	D	U	O	0	0	89	34.85	4	0	0	1	0	-	-	0	0.277	0.333	0.445
1AU1	A	74	S	U	O	0	0	4	33.39	4	0	0	1	0	-	-	0	0.258	0.333	0.02
1AU1	A	75	S	G	H	0	0	79	26.32	0	0	1	0	0	-	-	0	0.163	0.0	0.395
1AU1	A	76	S	G	H	0	0	56	28.78	0	0	1	0	0	-	-	0	0.196	0.0	0.28
1AU1	A	77	T	G	H	0	0	11	25.78	0	0	1	0	0	-	-	0	0.156	0.0	0.055
1AU1	A	78	G	T	O	0	0	66	38.62	3	0	0	1	0	-	-	0	0.328	0.25	0.33
1AU1	A	79	W	U	O	0	0	12	30.6	3	0	0	1	0	-	-	0	0.22	0.25	0.06
1AU1	A	80	N	U	O	0	0	87	29.41	3	0	0	1	0	-	-	0	0.204	0.25	0.435
1AU1	A	81	E	H	H	0	0	70	45.78	0	0	1	0	0	-	-	0	0.424	0.0	0.35
1AU1	A	82	T	H	H	0	0	89	33.66	0	0	1	0	0	-	-	0	0.261	0.0	0.445
1AU1	A	83	I	H	H	0	0	21	26.94	0	0	1	0	0	-	-	0	0.171	0.0	0.105
1AU1	A	84	V	H	H	0	0	4	27.05	0	0	1	0	0	-	-	0	0.173	0.0	0.02
1AU1	A	85	E	H	H	0	0	109	49.04	0	0	1	0	0	-	-	0	0.468	0.0	0.545
1AU1	A	86	N	H	H	0	0	79	40.0	0	0	1	0	0	2566	M10.004	1	0.346	0.0	0.395
1AU1	A	87	L	H	H	0	0	3	17.07	0	0	1	0	0	-	-	0	0.039	0.0	0.015
1AU1	A	88	L	H	H	0	0	22	18.11	0	0	1	0	0	-	-	0	0.053	0.0	0.11
1AU1	A	89	A	H	H	0	0	62	21.48	0	0	1	0	0	-	-	0	0.098	0.0	0.31
1AU1	A	90	N	H	H	0	0	37	21.29	0	0	1	0	0	-	-	0	0.095	0.0	0.185
1AU1	A	91	V	H	H	0	0	1	22.79	0	0	1	0	0	-	-	0	0.115	0.0	0.005
1AU1	A	92	Y	H	H	0	0	130	38.48	0	0	1	0	0	-	-	0	0.326	0.0	0.65
1AU1	A	93	H	H	H	0	0	115	41.9	0	0	1	0	0	2566	M10.004	1	0.372	0.0	0.575
1AU1	A	94	Q	H	H	0	0	2	28.16	0	0	1	0	0	-	-	0	0.187	0.0	0.01
1AU1	A	95	I	H	H	0	0	13	20.6	0	0	1	0	0	-	-	0	0.086	0.0	0.065
1AU1	A	96	N	H	H	0	0	48	35.22	0	0	1	0	0	-	-	0	0.282	0.0	0.24
1AU1	A	97	H	H	H	0	0	47	30.96	0	0	1	0	0	-	-	0	0.225	0.0	0.235
1AU1	A	98	L	H	H	0	0	0	17.09	0	0	1	0	0	-	-	0	0.039	0.0	0.0
1AU1	A	99	K	H	H	0	0	77	32.48	0	0	1	0	0	-	-	0	0.245	0.0	0.385
1AU1	A	100	T	H	H	0	0	66	32.85	0	0	1	0	0	-	-	0	0.25	0.0	0.33
1AU1	A	101	V	H	H	0	0	3	23.48	0	0	1	0	0	-	-	0	0.125	0.0	0.015
1AU1	A	102	L	H	H	0	0	9	24.78	0	0	1	0	0	-	-	0	0.142	0.0	0.045
1AU1	A	103	E	H	H	0	0	126	28.48	0	0	1	0	0	-	-	0	0.192	0.0	0.63
1AU1	A	104	E	H	H	0	0	115	42.25	0	0	1	0	0	-	-	0	0.377	0.0	0.575
1AU1	A	105	K	H	H	0	0	61	36.48	0	0	1	0	0	-	-	0	0.299	0.0	0.305
1AU1	A	106	L	H	H	0	0	35	35.59	0	0	1	0	0	-	-	0	0.287	0.0	0.175
1AU1	A	107	E	T	O	0	0	152	35.04	12	0	0	1	0	-	-	0	0.28	1.0	0.76
1AU1	A	108	K	T	O	0	0	177	48.21	12	0	0	1	0	-	-	0	0.457	1.0	0.885
1AU1	A	109	E	S	O	0	0	74	77.09	12	0	0	1	0	-	-	0	0.844	1.0	0.37
1AU1	A	110	D	S	O	0	0	163	78.16	12	0	0	1	0	-	-	0	0.859	1.0	0.815
1AU1	A	111	F	U	O	0	0	167	88.7	12	0	0	1	0	-	-	0	1.0	1.0	0.835
1AU1	A	112	T	U	O	0	0	31	87.32	12	0	0	1	0	-	-	0	0.981	1.0	0.155
1AU1	A	113	R	U	O	0	0	200	83.91	12	0	0	1	0	-	-	0	0.936	1.0	1.0
1AU1	A	114	G	U	O	0	0	12	79.69	12	0	0	1	0	-	-	0	0.879	1.0	0.06
1AU1	A	115	K	U	O	0	0	28	82.27	12	0	0	1	0	-	-	0	0.914	1.0	0.14
1AU1	A	116	L	T	O	0	0	94	78.41	12	0	0	1	0	-	-	0	0.862	1.0	0.47
1AU1	A	117	M	T	O	0	0	7	78.77	12	0	0	1	0	-	-	0	0.867	1.0	0.035
1AU1	A	118	S	T	O	0	0	0	73.31	12	0	0	1	0	-	-	0	0.793	1.0	0.0
1AU1	A	119	S	H	H	0	0	51	62.29	0	0	1	0	0	-	-	0	0.646	0.0	0.255
1AU1	A	120	L	H	H	0	0	59	39.07	0	0	1	0	0	-	-	0	0.334	0.0	0.295
1AU1	A	121	H	H	H	0	0	70	27.99	0	0	1	0	0	-	-	0	0.185	0.0	0.35
1AU1	A	122	L	H	H	0	0	0	16.0	0	0	1	0	0	-	-	0	0.024	0.0	0.0
1AU1	A	123	K	H	H	0	0	105	56.06	0	0	1	0	0	-	-	0	0.562	0.0	0.525
1AU1	A	124	R	H	H	0	0	154	60.78	0	0	1	0	0	-	-	0	0.625	0.0	0.77
1AU1	A	125	Y	H	H	0	0	0	17.35	0	0	1	0	0	-	-	0	0.042	0.0	0.0
1AU1	A	126	Y	H	H	0	0	1	19.31	0	0	1	0	0	-	-	0	0.069	0.0	0.005
1AU1	A	127	G	H	H	0	0	34	19.29	0	0	1	0	0	-	-	0	0.068	0.0	0.17
1AU1	A	128	R	H	H	0	0	86	17.76	0	0	1	0	0	-	-	0	0.048	0.0	0.43
1AU1	A	129	I	H	H	0	0	0	15.55	0	0	1	0	0	-	-	0	0.018	0.0	0.0
1AU1	A	130	L	H	H	0	0	52	19.9	0	0	1	0	0	-	-	0	0.077	0.0	0.26
1AU1	A	131	H	H	H	0	0	131	33.38	0	0	1	0	0	-	-	0	0.258	0.0	0.655
1AU1	A	132	Y	H	H	0	0	13	17.91	0	0	1	0	0	-	-	0	0.05	0.0	0.065
1AU1	A	133	L	H	H	0	0	0	20.79	0	0	1	0	0	-	-	0	0.089	0.0	0.0
1AU1	A	134	K	H	H	0	0	152	58.81	0	0	1	0	0	-	-	0	0.599	0.0	0.76
1AU1	A	135	A	H	H	0	0	67	27.45	0	0	1	0	0	-	-	0	0.178	0.0	0.335
1AU1	A	136	K	T	O	0	0	73	31.2	4	0	0	1	0	-	-	0	0.228	0.333	0.365
1AU1	A	137	E	T	O	0	0	171	51.92	4	0	0	1	0	-	-	0	0.506	0.333	0.855
1AU1	A	138	Y	T	O	0	0	56	32.63	4	0	0	1	1	-	-	0	0.247	0.333	0.28
1AU1	A	139	S	U	O	0	0	38	25.38	4	0	0	1	1	-	-	0	0.15	0.333	0.19
1AU1	A	140	H	H	H	0	0	62	35.4	0	0	1	0	1	-	-	0	0.285	0.0	0.31
1AU1	A	141	C	H	H	0	0	14	28.29	0	0	1	0	1	-	-	0	0.189	0.0	0.07
1AU1	A	142	A	H	H	0	0	0	21.61	0	0	1	0	1	-	-	0	0.1	0.0	0.0
1AU1	A	143	W	H	H	0	0	0	19.18	0	0	1	0	1	-	-	0	0.067	0.0	0.0
1AU1	A	144	T	H	H	0	0	10	22.11	0	0	1	0	1	-	-	0	0.106	0.0	0.05
1AU1	A	145	I	H	H	0	0	21	18.93	0	0	1	0	1	-	-	0	0.064	0.0	0.105
1AU1	A	146	V	H	H	0	0	0	18.77	0	0	1	0	1	-	-	0	0.061	0.0	0.0
1AU1	A	147	R	H	H	0	0	13	33.59	0	0	1	0	1	-	-	0	0.26	0.0	0.065
1AU1	A	148	V	H	H	0	0	81	17.58	0	0	1	0	1	-	-	0	0.045	0.0	0.405
1AU1	A	149	E	H	H	0	0	19	20.16	0	0	1	0	1	-	-	0	0.08	0.0	0.095
1AU1	A	150	I	H	H	0	0	0	21.3	0	0	1	0	1	-	-	0	0.095	0.0	0.0
1AU1	A	151	L	H	H	0	0	17	15.78	0	0	1	0	1	-	-	0	0.021	0.0	0.085
1AU1	A	152	R	H	H	0	0	97	27.07	0	0	1	0	1	-	-	0	0.173	0.0	0.485
1AU1	A	153	N	H	H	0	0	0	18.33	0	0	1	0	1	-	-	0	0.056	0.0	0.0
1AU1	A	154	F	H	H	0	0	0	15.63	0	0	1	0	1	-	-	0	0.019	0.0	0.0
1AU1	A	155	Y	H	H	0	0	153	19.27	0	0	1	0	1	-	-	0	0.068	0.0	0.765
1AU1	A	156	F	H	H	0	0	19	19.55	0	0	1	0	1	-	-	0	0.072	0.0	0.095
1AU1	A	157	I	H	H	0	0	0	20.42	0	0	1	0	1	-	-	0	0.084	0.0	0.0
1AU1	A	158	N	H	H	0	0	52	22.63	0	0	1	0	1	-	-	0	0.113	0.0	0.26
1AU1	A	159	R	H	H	0	0	61	27.13	0	0	1	0	1	-	-	0	0.174	0.0	0.305
1AU1	A	160	L	H	H	0	0	0	21.43	0	0	1	0	1	-	-	0	0.097	0.0	0.0
1AU1	A	161	T	H	H	0	0	0	21.67	0	0	1	0	1	-	-	0	0.1	0.0	0.0
1AU1	A	162	G	T	O	0	0	23	26.52	5	0	0	1	1	-	-	0	0.165	0.417	0.115
1AU1	A	163	Y	T	O	0	0	58	30.84	5	0	0	1	1	-	-	0	0.223	0.417	0.29
1AU1	A	164	L	U	O	0	0	0	33.23	5	0	0	1	1	-	-	0	0.256	0.417	0.0
1AU1	A	165	R	U	O	0	0	176	83.52	5	0	0	1	1	-	-	0	0.93	0.417	0.88
1AU1	A	166	N	U	O	0	0	135	85.79	5	0	0	1	1	-	-	0	0.961	0.417	0.675
1B6S	A	1	M	U	O	0	0	193	62.09	1	0	0	1	1	-	-	0	0.594	0.077	0.965
1B6S	A	2	K	E	B	1	0	91	28.74	0	1	0	0	1	-	-	0	0.236	0.0	0.455
1B6S	A	3	Q	E	B	1	0	47	25.98	0	1	0	0	1	-	-	0	0.207	0.0	0.235
1B6S	A	4	V	E	B	1	1	0	12.21	0	1	0	0	1	-	-	0	0.059	0.0	0.0
1B6S	A	5	C	E	B	1	1	2	17.67	0	1	0	0	1	-	-	0	0.117	0.0	0.01
1B6S	A	6	V	E	B	1	1	0	24.25	0	1	0	0	1	-	-	0	0.188	0.0	0.0
1B6S	A	7	L	E	B	1	1	2	23.3	0	1	0	0	1	-	-	0	0.178	0.0	0.01
1B6S	A	8	G	B	O	1	0	4	33.52	3	0	0	1	1	-	-	0	0.287	0.231	0.02
1B6S	A	9	N	U	O	0	0	113	32.8	3	0	0	1	1	-	-	0	0.28	0.231	0.565
1B6S	A	10	G	S	O	0	0	26	14.29	3	0	0	1	1	-	-	0	0.081	0.231	0.13
1B6S	A	11	Q	H	H	0	0	33	18.65	0	0	1	0	0	-	-	0	0.128	0.0	0.165
1B6S	A	12	L	H	H	0	0	15	14.28	0	0	1	0	0	-	-	0	0.081	0.0	0.075
1B6S	A	13	G	H	H	0	0	0	12.76	0	0	1	0	0	-	-	0	0.065	0.0	0.0
1B6S	A	14	R	H	H	0	0	68	15.16	0	0	1	0	0	-	-	0	0.091	0.0	0.34
1B6S	A	15	M	H	H	0	0	4	11.54	0	0	1	0	0	-	-	0	0.052	0.0	0.02
1B6S	A	16	L	H	H	0	0	4	15.34	0	0	1	0	0	-	-	0	0.093	0.0	0.02
1B6S	A	17	R	H	H	0	0	89	28.9	0	0	1	0	0	-	-	0	0.238	0.0	0.445
1B6S	A	18	Q	H	H	0	0	74	18.69	0	0	1	0	0	-	-	0	0.128	0.0	0.37
1B6S	A	19	A	H	H	0	0	17	24.47	0	0	1	0	0	-	-	0	0.19	0.0	0.085
1B6S	A	20	G	H	H	0	0	0	10.09	0	0	1	0	0	-	-	0	0.036	0.0	0.0
1B6S	A	21	E	G	H	0	0	142	20.49	0	0	1	0	0	-	-	0	0.148	0.0	0.71
1B6S	A	22	P	G	H	0	0	101	16.06	0	0	1	0	0	-	-	0	0.1	0.0	0.505
1B6S	A	23	L	G	H	0	0	69	16.48	0	0	1	0	0	-	-	0	0.105	0.0	0.345
1B6S	A	24	G	T	O	0	0	38	26.0	1	0	0	1	0	4489	M10.004	1	0.207	0.077	0.19
1B6S	A	25	I	E	B	1	0	4	13.75	0	1	0	0	0	-	-	0	0.075	0.0	0.02
1B6S	A	26	A	E	B	1	0	21	14.6	0	1	0	0	0	-	-	0	0.085	0.0	0.105
1B6S	A	27	V	E	B	1	0	8	20.83	0	1	0	0	0	-	-	0	0.151	0.0	0.04
1B6S	A	28	W	E	B	1	0	124	35.25	0	1	0	0	0	-	-	0	0.306	0.0	0.62
1B6S	A	29	P	E	B	1	0	32	31.22	0	1	0	0	0	-	-	0	0.263	0.0	0.16
1B6S	A	30	V	E	B	1	1	18	26.15	0	1	0	0	0	-	-	0	0.208	0.0	0.09
1B6S	A	31	G	U	O	0	0	7	32.32	5	0	0	1	0	4489	M10.004	1	0.275	0.385	0.035
1B6S	A	32	L	T	O	0	0	47	48.39	5	0	0	1	0	-	-	0	0.447	0.385	0.235
1B6S	A	33	D	T	O	0	0	137	50.32	5	0	0	1	0	-	-	0	0.467	0.385	0.685
1B6S	A	34	A	U	O	0	0	7	24.52	5	0	0	1	0	-	-	0	0.191	0.385	0.035
1B6S	A	35	E	U	O	0	0	109	47.79	5	0	0	1	0	-	-	0	0.44	0.385	0.545
1B6S	A	36	P	G	H	0	0	43	48.65	0	0	1	0	0	-	-	0	0.45	0.0	0.215
1B6S	A	37	A	G	H	0	0	98	45.52	0	0	1	0	0	-	-	0	0.416	0.0	0.49
1B6S	A	38	A	G	H	0	0	58	51.19	0	0	1	0	0	-	-	0	0.477	0.0	0.29
1B6S	A	39	V	S	O	0	0	8	45.44	2	0	0	1	0	-	-	0	0.415	0.154	0.04
1B6S	A	40	P	U	O	0	0	22	38.81	2	0	0	1	0	4489	M10.004	1	0.344	0.154	0.11
1B6S	A	41	F	G	H	0	0	20	42.44	0	0	1	0	0	-	-	0	0.383	0.0	0.1
1B6S	A	42	Q	G	H	0	0	109	45.86	0	0	1	0	0	4489	M10.004	1	0.42	0.0	0.545
1B6S	A	43	Q	G	H	0	0	110	39.42	0	0	1	0	0	-	-	0	0.351	0.0	0.55
1B6S	A	44	S	S	O	0	0	13	18.08	1	0	0	1	0	-	-	0	0.122	0.077	0.065
1B6S	A	45	V	E	B	1	0	37	18.24	0	1	0	0	0	-	-	0	0.124	0.0	0.185
1B6S	A	46	I	E	B	1	1	2	16.11	0	1	0	0	0	-	-	0	0.101	0.0	0.01
1B6S	A	47	T	E	B	1	0	3	21.88	0	1	0	0	0	-	-	0	0.163	0.0	0.015
1B6S	A	48	A	E	B	1	0	5	14.06	0	1	0	0	0	-	-	0	0.079	0.0	0.025
1B6S	A	49	E	S	O	0	0	23	16.2	8	0	0	1	0	-	-	0	0.102	0.615	0.115
1B6S	A	50	I	S	O	0	0	43	32.15	8	0	0	1	0	-	-	0	0.273	0.615	0.215
1B6S	A	51	E	S	O	0	0	52	57.39	8	0	0	1	0	-	-	0	0.543	0.615	0.26
1B6S	A	52	R	U	O	0	0	152	47.76	8	0	0	1	0	-	-	0	0.44	0.615	0.76
1B6S	A	53	W	U	O	0	0	63	25.46	8	0	0	1	0	-	-	0	0.201	0.615	0.315
1B6S	A	54	P	U	O	0	0	70	35.37	8	0	0	1	0	-	-	0	0.307	0.615	0.35
1B6S	A	55	E	U	O	0	0	136	32.66	8	0	0	1	0	-	-	0	0.278	0.615	0.68
1B6S	A	56	T	U	O	0	0	36	36.01	8	0	0	1	0	-	-	0	0.314	0.615	0.18
1B6S	A	57	A	H	H	0	0	65	29.09	0	0	1	0	0	-	-	0	0.24	0.0	0.325
1B6S	A	58	L	H	H	0	0	1	37.39	0	0	1	0	0	-	-	0	0.329	0.0	0.005
1B6S	A	59	T	H	H	0	0	9	27.45	0	0	1	0	0	-	-	0	0.222	0.0	0.045
1B6S	A	60	R	H	H	0	0	157	54.54	0	0	1	0	0	-	-	0	0.513	0.0	0.785
1B6S	A	61	E	H	H	0	0	63	38.43	0	0	1	0	0	-	-	0	0.34	0.0	0.315
1B6S	A	62	L	G	H	0	0	6	22.24	0	0	1	0	0	-	-	0	0.166	0.0	0.03
1B6S	A	63	A	G	H	0	0	64	28.03	0	0	1	0	0	-	-	0	0.229	0.0	0.32
1B6S	A	64	R	G	H	0	0	188	41.91	0	0	1	0	0	-	-	0	0.377	0.0	0.94
1B6S	A	65	H	U	O	0	0	22	26.51	9	0	0	1	0	-	-	0	0.212	0.692	0.11
1B6S	A	66	P	T	O	0	0	135	37.89	9	0	0	1	0	-	-	0	0.334	0.692	0.675
1B6S	A	67	A	T	O	0	0	30	37.75	9	0	0	1	0	-	-	0	0.333	0.692	0.15
1B6S	A	68	F	B	O	1	0	11	24.52	9	0	0	1	0	-	-	0	0.191	0.692	0.055
1B6S	A	69	V	T	O	0	0	15	20.02	9	0	0	1	0	-	-	0	0.143	0.692	0.075
1B6S	A	70	N	T	O	0	0	18	25.58	9	0	0	1	0	-	-	0	0.202	0.692	0.09
1B6S	A	71	R	T	O	0	0	57	26.36	9	0	0	1	0	-	-	0	0.211	0.692	0.285
1B6S	A	72	D	T	O	0	0	111	41.43	9	0	0	1	0	-	-	0	0.372	0.692	0.555
1B6S	A	73	V	T	O	0	0	14	31.78	9	0	0	1	0	-	-	0	0.269	0.692	0.07
1B6S	A	74	F	H	H	0	0	4	25.42	0	0	1	0	0	-	-	0	0.201	0.0	0.02
1B6S	A	75	P	H	H	0	0	80	33.45	0	0	1	0	0	-	-	0	0.287	0.0	0.4
1B6S	A	76	I	H	H	0	0	62	36.21	0	0	1	0	0	-	-	0	0.316	0.0	0.31
1B6S	A	77	I	H	H	0	0	2	41.33	0	0	1	0	0	-	-	0	0.371	0.0	0.01
1B6S	A	78	A	H	H	0	0	19	39.63	0	0	1	0	0	-	-	0	0.353	0.0	0.095
1B6S	A	79	D	U	O	0	0	23	47.94	1	0	0	1	0	-	-	0	0.442	0.077	0.115
1B6S	A	80	R	H	H	0	0	37	42.77	0	0	1	0	0	-	-	0	0.387	0.0	0.185
1B6S	A	81	L	H	H	0	0	20	55.57	0	0	1	0	0	-	-	0	0.524	0.0	0.1
1B6S	A	82	T	H	H	0	0	37	39.71	0	0	1	0	0	-	-	0	0.354	0.0	0.185
1B6S	A	83	Q	H	H	0	0	12	23.85	0	0	1	0	0	-	-	0	0.184	0.0	0.06
1B6S	A	84	K	H	H	0	0	4	29.95	0	0	1	0	0	-	-	0	0.249	0.0	0.02
1B6S	A	85	Q	H	H	0	0	99	50.14	0	0	1	0	0	-	-	0	0.466	0.0	0.495
1B6S	A	86	L	H	H	0	0	15	49.04	0	0	1	0	0	-	-	0	0.454	0.0	0.075
1B6S	A	87	F	H	H	0	0	1	29.28	0	0	1	0	0	-	-	0	0.242	0.0	0.005
1B6S	A	88	D	H	H	0	0	72	56.34	0	0	1	0	0	-	-	0	0.532	0.0	0.36
1B6S	A	89	K	H	H	0	0	134	44.31	0	0	1	0	0	-	-	0	0.403	0.0	0.67
1B6S	A	90	L	H	H	0	0	35	25.27	0	0	1	0	0	-	-	0	0.199	0.0	0.175
1B6S	A	91	H	T	O	0	0	163	51.08	6	0	0	1	0	-	-	0	0.476	0.462	0.815
1B6S	A	92	L	U	O	0	0	14	41.15	6	0	0	1	0	-	-	0	0.369	0.462	0.07
1B6S	A	93	P	U	O	0	0	40	27.32	6	0	0	1	0	-	-	0	0.221	0.462	0.2
1B6S	A	94	T	B	O	1	0	23	36.28	6	0	0	1	0	-	-	0	0.317	0.462	0.115
1B6S	A	95	A	U	O	0	0	2	52.24	6	0	0	1	0	-	-	0	0.488	0.462	0.01
1B6S	A	96	P	U	O	0	0	53	56.6	6	0	0	1	0	-	-	0	0.535	0.462	0.265
1B6S	A	97	W	E	B	1	0	48	40.68	0	1	0	0	0	-	-	0	0.364	0.0	0.24
1B6S	A	98	Q	E	B	1	0	44	55.68	0	1	0	0	0	4489	M10.004	1	0.525	0.0	0.22
1B6S	A	99	L	E	B	1	0	48	69.98	0	1	0	0	0	-	-	0	0.678	0.0	0.24
1B6S	A	100	L	U	O	0	0	0	71.99	3	0	0	1	0	-	-	0	0.7	0.231	0.0
1B6S	A	101	A	U	O	0	0	36	65.67	3	0	0	1	0	-	-	0	0.632	0.231	0.18
1B6S	A	102	E	U	O	0	0	118	64.38	3	0	0	1	0	-	-	0	0.618	0.231	0.59
1B6S	A	103	R	G	H	0	0	113	74.28	0	0	1	0	0	-	-	0	0.724	0.0	0.565
1B6S	A	104	S	G	H	0	0	83	75.71	0	0	1	0	0	-	-	0	0.74	0.0	0.415
1B6S	A	105	E	G	H	0	0	66	75.12	0	0	1	0	0	-	-	0	0.733	0.0	0.33
1B6S	A	106	W	H	H	0	0	15	72.54	0	0	1	0	0	-	-	0	0.706	0.0	0.075
1B6S	A	107	P	H	H	0	0	97	66.2	0	0	1	0	0	-	-	0	0.638	0.0	0.485
1B6S	A	108	A	H	H	0	0	35	70.81	0	0	1	0	0	-	-	0	0.687	0.0	0.175
1B6S	A	109	V	H	H	0	0	0	69.41	0	0	1	0	0	-	-	0	0.672	0.0	0.0
1B6S	A	110	F	H	H	0	0	29	59.71	0	0	1	0	0	-	-	0	0.568	0.0	0.145
1B6S	A	111	D	H	H	0	0	109	74.13	0	0	1	0	0	-	-	0	0.723	0.0	0.545
1B6S	A	112	R	H	H	0	0	132	66.66	0	0	1	0	0	-	-	0	0.643	0.0	0.66
1B6S	A	113	L	S	O	0	0	13	63.84	4	0	0	1	0	-	-	0	0.612	0.308	0.065
1B6S	A	114	G	U	O	0	0	31	77.28	4	0	0	1	0	-	-	0	0.756	0.308	0.155
1B6S	A	115	E	S	O	0	0	167	74.89	4	0	0	1	0	-	-	0	0.731	0.308	0.835
1B6S	A	116	L	U	O	0	0	47	71.29	4	0	0	1	0	-	-	0	0.692	0.308	0.235
1B6S	A	117	A	E	B	1	1	0	73.03	0	1	0	0	0	-	-	0	0.711	0.0	0.0
1B6S	A	118	I	E	B	1	1	18	56.06	0	1	0	0	0	-	-	0	0.529	0.0	0.09
1B6S	A	119	V	E	B	1	1	0	55.77	0	1	0	0	0	-	-	0	0.526	0.0	0.0
1B6S	A	120	K	E	B	1	1	13	60.97	0	1	0	0	0	-	-	0	0.582	0.0	0.065
1B6S	A	121	R	E	B	0	1	93	54.69	0	1	0	0	0	-	-	0	0.514	0.0	0.465
1B6S	A	122	R	S	O	0	0	68	49.23	5	0	0	1	0	-	-	0	0.456	0.385	0.34
1B6S	A	123	T	S	O	0	0	14	56.62	5	0	0	1	0	-	-	0	0.535	0.385	0.07
1B6S	A	124	G	U	O	0	0	62	77.68	5	0	0	1	0	-	-	0	0.761	0.385	0.31
1B6S	A	125	G	U	O	0	0	46	71.52	5	0	0	1	0	-	-	0	0.695	0.385	0.23
1B6S	A	130	G	U	O	0	0	55	64.24	5	0	0	1	0	-	-	0	0.617	0.385	0.275
1B6S	A	131	Q	E	B	1	0	83	61.93	0	1	0	0	0	-	-	0	0.592	0.0	0.415
1B6S	A	132	W	E	B	1	0	92	69.03	0	1	0	0	0	-	-	0	0.668	0.0	0.46
1B6S	A	133	R	E	B	1	0	157	66.36	0	1	0	0	0	-	-	0	0.639	0.0	0.785
1B6S	A	134	L	E	B	1	0	3	66.85	0	1	0	0	0	-	-	0	0.645	0.0	0.015
1B6S	A	135	R	U	O	0	0	149	73.76	4	0	0	1	0	-	-	0	0.719	0.308	0.745
1B6S	A	136	A	T	O	0	0	72	87.97	4	0	0	1	0	-	-	0	0.871	0.308	0.36
1B6S	A	137	N	T	O	0	0	139	76.55	4	0	0	1	0	-	-	0	0.749	0.308	0.695
1B6S	A	138	E	T	O	0	0	52	75.27	4	0	0	1	0	-	-	0	0.735	0.308	0.26
1B6S	A	139	T	G	H	0	0	25	76.35	0	0	1	0	0	-	-	0	0.746	0.0	0.125
1B6S	A	140	E	G	H	0	0	173	100.0	0	0	1	0	0	-	-	0	1.0	0.0	0.865
1B6S	A	141	Q	G	H	0	0	122	65.43	0	0	1	0	0	-	-	0	0.629	0.0	0.61
1B6S	A	142	L	S	O	0	0	9	65.58	8	0	0	1	0	-	-	0	0.631	0.615	0.045
1B6S	A	143	P	U	O	0	0	45	72.52	8	0	0	1	0	-	-	0	0.705	0.615	0.225
1B6S	A	144	A	S	O	0	0	62	100.0	8	0	0	1	0	-	-	0	1.0	0.615	0.31
1B6S	A	145	E	T	O	0	0	162	61.18	8	0	0	1	0	-	-	0	0.584	0.615	0.81
1B6S	A	146	C	T	O	0	0	4	48.93	8	0	0	1	0	-	-	0	0.453	0.615	0.02
1B6S	A	147	Y	T	O	0	0	46	69.71	8	0	0	1	0	-	-	0	0.675	0.615	0.23
1B6S	A	148	G	T	O	0	0	28	100.0	8	0	0	1	0	-	-	0	1.0	0.615	0.14
1B6S	A	149	E	T	O	0	0	74	56.84	8	0	0	1	0	-	-	0	0.537	0.615	0.37
1B6S	A	150	C	E	B	0	1	1	38.38	0	1	0	0	0	-	-	0	0.339	0.0	0.005
1B6S	A	151	I	E	B	1	1	0	53.77	0	1	0	0	0	-	-	0	0.504	0.0	0.0
1B6S	A	152	V	E	B	1	1	0	54.21	0	1	0	0	0	-	-	0	0.509	0.0	0.0
1B6S	A	153	E	E	B	1	1	9	49.44	0	1	0	0	0	-	-	0	0.458	0.0	0.045
1B6S	A	154	Q	E	B	0	1	66	49.72	0	1	0	0	0	-	-	0	0.461	0.0	0.33
1B6S	A	155	G	U	O	0	0	14	63.49	5	0	0	1	0	-	-	0	0.609	0.385	0.07
1B6S	A	156	I	U	O	0	0	31	41.02	5	0	0	1	0	-	-	0	0.368	0.385	0.155
1B6S	A	157	N	U	O	0	0	136	61.0	5	0	0	1	0	-	-	0	0.582	0.385	0.68
1B6S	A	158	F	U	O	0	0	75	30.27	5	0	0	1	0	-	-	0	0.253	0.385	0.375
1B6S	A	159	S	S	O	0	0	96	35.7	5	0	0	1	0	-	-	0	0.311	0.385	0.48
1B6S	A	160	G	E	B	1	0	22	23.16	0	1	0	0	0	-	-	0	0.176	0.0	0.11
1B6S	A	161	E	E	B	1	0	33	28.87	0	1	0	0	0	-	-	0	0.238	0.0	0.165
1B6S	A	162	V	E	B	1	1	2	13.78	0	1	0	0	0	-	-	0	0.076	0.0	0.01
1B6S	A	163	S	E	B	1	1	0	18.44	0	1	0	0	0	-	-	0	0.126	0.0	0.0
1B6S	A	164	L	E	B	1	0	1	26.36	0	1	0	0	0	-	-	0	0.211	0.0	0.005
1B6S	A	165	V	E	B	1	0	1	21.4	0	1	0	0	0	-	-	0	0.157	0.0	0.005
1B6S	A	166	G	E	B	1	1	0	20.62	0	1	0	0	0	-	-	0	0.149	0.0	0.0
1B6S	A	167	A	E	B	1	1	0	9.3	0	1	0	0	0	-	-	0	0.028	0.0	0.0
1B6S	A	168	R	E	B	1	1	42	24.77	0	1	0	0	0	-	-	0	0.194	0.0	0.21
1B6S	A	169	G	U	O	0	0	5	13.08	5	0	0	1	0	-	-	0	0.068	0.385	0.025
1B6S	A	170	F	T	O	0	0	105	27.06	5	0	0	1	0	-	-	0	0.218	0.385	0.525
1B6S	A	171	D	T	O	0	0	126	47.22	5	0	0	1	0	-	-	0	0.434	0.385	0.63
1B6S	A	172	G	S	O	0	0	31	23.98	5	0	0	1	0	-	-	0	0.185	0.385	0.155
1B6S	A	173	S	U	O	0	0	53	31.08	5	0	0	1	0	-	-	0	0.261	0.385	0.265
1B6S	A	174	T	E	B	1	0	56	26.15	0	1	0	0	0	-	-	0	0.208	0.0	0.28
1B6S	A	175	V	E	B	1	0	9	28.4	0	1	0	0	0	-	-	0	0.233	0.0	0.045
1B6S	A	176	F	E	B	1	0	9	36.47	0	1	0	0	0	-	-	0	0.319	0.0	0.045
1B6S	A	177	Y	U	O	0	0	2	12.15	3	0	0	1	0	-	-	0	0.058	0.231	0.01
1B6S	A	178	P	U	O	0	0	13	28.3	3	0	0	1	0	-	-	0	0.231	0.231	0.065
1B6S	A	179	L	U	O	0	0	2	14.63	3	0	0	1	0	-	-	0	0.085	0.231	0.01
1B6S	A	180	T	E	B	1	1	0	13.34	0	1	0	0	0	-	-	0	0.071	0.0	0.0
1B6S	A	181	H	E	B	1	1	41	24.4	0	1	0	0	0	-	-	0	0.19	0.0	0.205
1B6S	A	182	N	E	B	0	1	7	21.09	0	1	0	0	0	-	-	0	0.154	0.0	0.035
1B6S	A	183	L	E	B	0	1	31	18.6	0	1	0	0	0	-	-	0	0.127	0.0	0.155
1B6S	A	184	H	E	B	0	1	49	29.59	0	1	0	0	0	-	-	0	0.245	0.0	0.245
1B6S	A	185	Q	E	B	0	1	62	29.93	0	1	0	0	0	-	-	0	0.249	0.0	0.31
1B6S	A	186	D	T	O	0	0	177	40.26	2	0	0	1	0	-	-	0	0.36	0.154	0.885
1B6S	A	187	G	T	O	0	0	65	55.01	2	0	0	1	0	-	-	0	0.518	0.154	0.325
1B6S	A	188	I	E	B	1	0	63	38.9	0	1	0	0	0	-	-	0	0.345	0.0	0.315
1B6S	A	189	L	E	B	1	0	8	20.26	0	1	0	0	0	-	-	0	0.145	0.0	0.04
1B6S	A	190	R	E	B	0	0	38	29.09	0	1	0	0	0	-	-	0	0.24	0.0	0.19
1B6S	A	191	T	E	B	1	1	4	34.38	0	1	0	0	0	-	-	0	0.297	0.0	0.02
1B6S	A	192	S	E	B	1	1	0	28.03	0	1	0	0	0	-	-	0	0.229	0.0	0.0
1B6S	A	193	V	E	B	1	1	0	23.96	0	1	0	0	0	-	-	0	0.185	0.0	0.0
1B6S	A	194	A	E	B	1	1	1	16.86	0	1	0	0	0	-	-	0	0.109	0.0	0.005
1B6S	A	195	F	U	O	0	0	50	27.75	5	0	0	1	0	-	-	0	0.226	0.385	0.25
1B6S	A	196	P	S	O	0	0	37	22.28	5	0	0	1	0	-	-	0	0.167	0.385	0.185
1B6S	A	197	Q	S	O	0	0	170	46.95	5	0	0	1	0	-	-	0	0.431	0.385	0.85
1B6S	A	198	A	U	O	0	0	28	26.15	5	0	0	1	0	-	-	0	0.208	0.385	0.14
1B6S	A	199	N	U	O	0	0	83	35.35	5	0	0	1	0	-	-	0	0.307	0.385	0.415
1B6S	A	200	A	H	H	0	0	62	40.86	0	0	1	0	0	-	-	0	0.366	0.0	0.31
1B6S	A	201	Q	H	H	0	0	145	54.52	0	0	1	0	0	-	-	0	0.512	0.0	0.725
1B6S	A	202	Q	H	H	0	0	57	48.4	0	0	1	0	0	-	-	0	0.447	0.0	0.285
1B6S	A	203	Q	H	H	0	0	25	21.04	0	0	1	0	0	-	-	0	0.154	0.0	0.125
1B6S	A	204	A	H	H	0	0	42	21.56	0	0	1	0	0	-	-	0	0.159	0.0	0.21
1B6S	A	205	R	H	H	0	0	82	38.12	0	0	1	0	0	-	-	0	0.337	0.0	0.41
1B6S	A	206	A	H	H	0	0	0	36.76	0	0	1	0	0	-	-	0	0.322	0.0	0.0
1B6S	A	207	E	H	H	0	0	58	39.36	0	0	1	0	0	-	-	0	0.35	0.0	0.29
1B6S	A	208	E	H	H	0	0	122	40.68	0	0	1	0	0	-	-	0	0.364	0.0	0.61
1B6S	A	209	M	H	H	0	0	0	34.47	0	0	1	0	0	-	-	0	0.298	0.0	0.0
1B6S	A	210	L	H	H	0	0	0	18.74	0	0	1	0	0	-	-	0	0.129	0.0	0.0
1B6S	A	211	S	H	H	0	0	26	23.43	0	0	1	0	0	-	-	0	0.179	0.0	0.13
1B6S	A	212	A	H	H	0	0	30	21.74	0	0	1	0	0	-	-	0	0.161	0.0	0.15
1B6S	A	213	I	H	H	0	0	0	19.6	0	0	1	0	0	-	-	0	0.138	0.0	0.0
1B6S	A	214	M	H	H	0	0	0	21.66	0	0	1	0	0	-	-	0	0.16	0.0	0.0
1B6S	A	215	Q	H	H	0	0	131	43.0	0	0	1	0	0	-	-	0	0.389	0.0	0.655
1B6S	A	216	E	H	H	0	0	88	29.88	0	0	1	0	0	-	-	0	0.248	0.0	0.44
1B6S	A	217	L	H	H	0	0	26	30.25	0	0	1	0	0	-	-	0	0.252	0.0	0.13
1B6S	A	218	G	T	O	0	0	34	19.11	3	0	0	1	0	-	-	0	0.133	0.231	0.17
1B6S	A	219	Y	U	O	0	0	2	22.41	3	0	0	1	0	-	-	0	0.168	0.231	0.01
1B6S	A	220	V	U	O	0	0	5	11.1	3	0	0	1	0	-	-	0	0.047	0.231	0.025
1B6S	A	221	G	E	B	1	0	0	14.91	0	1	0	0	0	-	-	0	0.088	0.0	0.0
1B6S	A	222	V	E	B	1	0	0	23.78	0	1	0	0	0	-	-	0	0.183	0.0	0.0
1B6S	A	223	M	E	B	1	0	0	15.46	0	1	0	0	0	-	-	0	0.094	0.0	0.0
1B6S	A	224	A	E	B	1	1	1	20.71	0	1	0	0	0	-	-	0	0.15	0.0	0.005
1B6S	A	225	M	E	B	1	1	0	19.73	0	1	0	0	0	-	-	0	0.14	0.0	0.0
1B6S	A	226	E	E	B	1	1	18	28.5	0	1	0	0	0	-	-	0	0.234	0.0	0.09
1B6S	A	227	C	E	B	1	1	3	25.19	0	1	0	0	0	-	-	0	0.198	0.0	0.015
1B6S	A	228	F	E	B	1	1	20	23.98	0	1	0	0	0	-	-	0	0.185	0.0	0.1
1B6S	A	229	V	E	B	1	0	25	30.54	0	1	0	0	0	-	-	0	0.255	0.0	0.125
1B6S	A	230	T	U	O	0	0	10	29.01	5	0	0	1	0	-	-	0	0.239	0.385	0.05
1B6S	A	231	P	T	O	0	0	115	64.1	5	0	0	1	0	-	-	0	0.615	0.385	0.575
1B6S	A	232	Q	T	O	0	0	160	55.93	5	0	0	1	0	-	-	0	0.528	0.385	0.8
1B6S	A	233	G	U	O	0	0	31	61.58	5	0	0	1	0	-	-	0	0.588	0.385	0.155
1B6S	A	234	L	U	O	0	0	15	34.01	5	0	0	1	0	-	-	0	0.293	0.385	0.075
1B6S	A	235	L	E	B	0	1	25	29.49	0	1	0	0	0	-	-	0	0.244	0.0	0.125
1B6S	A	236	I	E	B	1	1	1	29.66	0	1	0	0	0	-	-	0	0.246	0.0	0.005
1B6S	A	237	N	E	B	0	0	13	27.01	0	1	0	0	0	-	-	0	0.218	0.0	0.065
1B6S	A	238	E	E	B	0	1	49	35.9	0	1	0	0	0	-	-	0	0.313	0.0	0.245
1B6S	A	239	L	E	B	0	1	2	25.53	0	1	0	0	0	-	-	0	0.202	0.0	0.01
1B6S	A	240	A	E	B	0	1	7	21.52	0	1	0	0	0	-	-	0	0.159	0.0	0.035
1B6S	A	241	P	S	O	0	0	2	18.58	4	0	0	1	0	-	-	0	0.127	0.308	0.01
1B6S	A	242	R	S	O	0	0	50	21.03	4	0	0	1	0	-	-	0	0.153	0.308	0.25
1B6S	A	243	V	U	O	0	0	3	17.29	4	0	0	1	0	-	-	0	0.113	0.308	0.015
1B6S	A	244	H	U	O	0	0	14	29.85	4	0	0	1	0	-	-	0	0.248	0.308	0.07
1B6S	A	245	N	G	H	0	0	9	17.88	0	0	1	0	0	-	-	0	0.12	0.0	0.045
1B6S	A	246	S	G	H	0	0	0	13.67	0	0	1	0	0	-	-	0	0.075	0.0	0.0
1B6S	A	247	G	G	H	0	0	0	11.57	0	0	1	0	0	-	-	0	0.052	0.0	0.0
1B6S	A	248	H	T	O	0	0	0	19.18	2	0	0	1	0	-	-	0	0.134	0.154	0.0
1B6S	A	249	W	T	O	0	0	3	23.14	2	0	0	1	0	-	-	0	0.176	0.154	0.015
1B6S	A	250	T	H	H	0	0	0	13.33	0	0	1	0	0	-	-	0	0.071	0.0	0.0
1B6S	A	251	Q	H	H	0	0	38	14.34	0	0	1	0	0	-	-	0	0.082	0.0	0.19
1B6S	A	252	N	H	H	0	0	56	16.07	0	0	1	0	0	-	-	0	0.1	0.0	0.28
1B6S	A	253	G	H	H	0	0	10	11.26	0	0	1	0	0	-	-	0	0.049	0.0	0.05
1B6S	A	254	A	S	O	0	0	17	14.38	4	0	0	1	0	-	-	0	0.082	0.308	0.085
1B6S	A	255	S	S	O	0	0	69	11.68	4	0	0	1	0	-	-	0	0.053	0.308	0.345
1B6S	A	256	I	S	O	0	0	11	16.16	4	0	0	1	0	-	-	0	0.101	0.308	0.055
1B6S	A	257	S	U	O	0	0	9	15.81	4	0	0	1	0	-	-	0	0.098	0.308	0.045
1B6S	A	258	Q	H	H	0	0	0	23.88	0	0	1	0	0	-	-	0	0.184	0.0	0.0
1B6S	A	259	F	H	H	0	0	1	22.67	0	0	1	0	0	-	-	0	0.171	0.0	0.005
1B6S	A	260	E	H	H	0	0	41	44.55	0	0	1	0	0	-	-	0	0.406	0.0	0.205
1B6S	A	261	L	H	H	0	0	0	21.22	0	0	1	0	0	-	-	0	0.156	0.0	0.0
1B6S	A	262	H	H	H	0	0	5	18.17	0	0	1	0	0	-	-	0	0.123	0.0	0.025
1B6S	A	263	L	H	H	0	0	0	12.53	0	0	1	0	0	-	-	0	0.062	0.0	0.0
1B6S	A	264	R	H	H	0	0	43	15.34	0	0	1	0	0	-	-	0	0.093	0.0	0.215
1B6S	A	265	A	H	H	0	0	4	12.69	0	0	1	0	0	-	-	0	0.064	0.0	0.02
1B6S	A	266	I	H	H	0	0	2	14.26	0	0	1	0	0	-	-	0	0.081	0.0	0.01
1B6S	A	267	T	T	O	0	0	7	18.39	13	0	0	1	0	-	-	0	0.125	1.0	0.035
1B6S	A	268	D	T	O	0	0	113	28.66	13	0	0	1	0	-	-	0	0.235	1.0	0.565
1B6S	A	269	L	U	O	0	0	52	19.24	13	0	0	1	0	-	-	0	0.134	1.0	0.26
1B6S	A	270	P	U	O	0	0	92	15.3	13	0	0	1	0	-	-	0	0.092	1.0	0.46
1B6S	A	271	L	U	O	0	0	30	20.55	13	0	0	1	0	-	-	0	0.148	1.0	0.15
1B6S	A	272	P	U	O	0	0	68	24.26	13	0	0	1	0	-	-	0	0.188	1.0	0.34
1B6S	A	273	Q	U	O	0	0	103	29.18	13	0	0	1	0	-	-	0	0.241	1.0	0.515
1B6S	A	274	P	U	O	0	0	9	26.74	13	0	0	1	0	-	-	0	0.215	1.0	0.045
1B6S	A	275	V	U	O	0	0	79	18.81	13	0	0	1	0	-	-	0	0.13	1.0	0.395
1B6S	A	276	V	U	O	0	0	24	18.21	13	0	0	1	0	-	-	0	0.123	1.0	0.12
1B6S	A	277	N	U	O	0	0	125	31.48	13	0	0	1	0	-	-	0	0.266	1.0	0.625
1B6S	A	278	N	S	O	0	0	56	33.32	13	0	0	1	0	-	-	0	0.285	1.0	0.28
1B6S	A	279	P	U	O	0	0	12	21.23	13	0	0	1	0	-	-	0	0.156	1.0	0.06
1B6S	A	280	S	E	B	1	1	2	15.96	0	1	0	0	0	-	-	0	0.099	0.0	0.01
1B6S	A	281	V	E	B	1	1	0	21.61	0	1	0	0	0	-	-	0	0.16	0.0	0.0
1B6S	A	282	M	E	B	1	1	0	17.24	0	1	0	0	0	-	-	0	0.113	0.0	0.0
1B6S	A	283	I	E	B	1	1	3	17.6	0	1	0	0	0	-	-	0	0.117	0.0	0.015
1B6S	A	284	N	E	B	0	1	1	15.85	0	1	0	0	0	-	-	0	0.098	0.0	0.005
1B6S	A	285	L	E	B	0	1	0	12.39	0	1	0	0	0	-	-	0	0.061	0.0	0.0
1B6S	A	286	I	E	B	0	1	9	22.85	0	1	0	0	0	-	-	0	0.173	0.0	0.045
1B6S	A	287	G	S	O	0	0	25	25.86	5	0	0	1	0	-	-	0	0.205	0.385	0.125
1B6S	A	288	S	U	O	0	0	9	19.28	5	0	0	1	0	-	-	0	0.135	0.385	0.045
1B6S	A	289	D	U	O	0	0	118	36.42	5	0	0	1	0	-	-	0	0.318	0.385	0.59
1B6S	A	290	V	U	O	0	0	43	28.32	5	0	0	1	0	-	-	0	0.232	0.385	0.215
1B6S	A	291	N	U	O	0	0	54	29.38	5	0	0	1	0	-	-	0	0.243	0.385	0.27
1B6S	A	292	Y	G	H	0	0	148	12.43	0	0	1	0	0	-	-	0	0.061	0.0	0.74
1B6S	A	293	D	G	H	0	0	65	38.97	0	0	1	0	0	-	-	0	0.346	0.0	0.325
1B6S	A	294	W	G	H	0	0	2	24.91	0	0	1	0	0	-	-	0	0.195	0.0	0.01
1B6S	A	295	L	G	H	0	0	89	11.14	0	0	1	0	0	-	-	0	0.047	0.0	0.445
1B6S	A	296	K	G	H	0	0	143	37.99	0	0	1	0	0	-	-	0	0.335	0.0	0.715
1B6S	A	297	L	S	O	0	0	30	14.48	3	0	0	1	0	-	-	0	0.083	0.231	0.15
1B6S	A	298	P	T	O	0	0	120	24.93	3	0	0	1	0	-	-	0	0.195	0.231	0.6
1B6S	A	299	L	T	O	0	0	24	14.15	3	0	0	1	0	-	-	0	0.08	0.231	0.12
1B6S	A	300	V	E	B	1	0	13	12.79	0	1	0	0	0	-	-	0	0.065	0.0	0.065
1B6S	A	301	H	E	B	1	0	67	12.15	0	1	0	0	0	-	-	0	0.058	0.0	0.335
1B6S	A	302	L	E	B	1	0	45	8.55	0	1	0	0	0	-	-	0	0.02	0.0	0.225
1B6S	A	303	H	E	B	1	0	32	18.02	0	1	0	0	0	-	-	0	0.121	0.0	0.16
1B6S	A	304	W	E	B	1	0	40	16.75	0	1	0	0	0	-	-	0	0.108	0.0	0.2
1B6S	A	305	Y	U	O	0	0	8	8.35	9	0	0	1	0	-	-	0	0.018	0.692	0.04
1B6S	A	306	D	U	O	0	0	118	34.86	9	0	0	1	0	-	-	0	0.302	0.692	0.59
1B6S	A	307	K	U	O	0	0	49	22.02	9	0	0	1	0	-	-	0	0.164	0.692	0.245
1B6S	A	308	E	U	O	0	0	155	38.1	9	0	0	1	0	-	-	0	0.336	0.692	0.775
1B6S	A	309	V	U	O	0	0	42	22.14	9	0	0	1	0	-	-	0	0.165	0.692	0.21
1B6S	A	310	R	U	O	0	0	132	40.77	9	0	0	1	0	-	-	0	0.365	0.692	0.66
1B6S	A	311	P	T	O	0	0	124	27.52	9	0	0	1	0	-	-	0	0.223	0.692	0.62
1B6S	A	312	G	T	O	0	0	62	28.21	9	0	0	1	0	-	-	0	0.23	0.692	0.31
1B6S	A	313	R	U	O	0	0	57	24.61	9	0	0	1	0	-	-	0	0.192	0.692	0.285
1B6S	A	314	K	E	B	1	0	58	24.81	0	1	0	0	0	-	-	0	0.194	0.0	0.29
1B6S	A	315	V	E	B	0	0	0	17.63	0	1	0	0	0	-	-	0	0.117	0.0	0.0
1B6S	A	316	G	E	B	1	1	0	6.71	0	1	0	0	0	-	-	0	0.0	0.0	0.0
1B6S	A	317	H	E	B	1	1	0	9.74	0	1	0	0	0	-	-	0	0.032	0.0	0.0
1B6S	A	318	L	E	B	1	1	0	11.4	0	1	0	0	0	-	-	0	0.05	0.0	0.0
1B6S	A	319	N	E	B	1	1	2	12.62	0	1	0	0	0	-	-	0	0.063	0.0	0.01
1B6S	A	320	L	E	B	1	1	1	23.51	0	1	0	0	0	-	-	0	0.18	0.0	0.005
1B6S	A	321	T	E	B	1	0	25	24.1	0	1	0	0	0	-	-	0	0.186	0.0	0.125
1B6S	A	322	D	U	O	0	0	19	26.95	3	0	0	1	0	-	-	0	0.217	0.231	0.095
1B6S	A	323	S	S	O	0	0	79	27.62	3	0	0	1	0	-	-	0	0.224	0.231	0.395
1B6S	A	324	D	U	O	0	0	68	31.57	3	0	0	1	0	-	-	0	0.266	0.231	0.34
1B6S	A	325	T	H	H	0	0	56	41.83	0	0	1	0	0	-	-	0	0.376	0.0	0.28
1B6S	A	326	S	H	H	0	0	78	40.81	0	0	1	0	0	-	-	0	0.366	0.0	0.39
1B6S	A	327	R	H	H	0	0	123	34.53	0	0	1	0	0	-	-	0	0.298	0.0	0.615
1B6S	A	328	L	H	H	0	0	0	23.8	0	0	1	0	0	-	-	0	0.183	0.0	0.0
1B6S	A	329	T	H	H	0	0	36	28.62	0	0	1	0	0	-	-	0	0.235	0.0	0.18
1B6S	A	330	A	H	H	0	0	61	23.77	0	0	1	0	0	-	-	0	0.183	0.0	0.305
1B6S	A	331	T	H	H	0	0	13	13.71	0	0	1	0	0	-	-	0	0.075	0.0	0.065
1B6S	A	332	L	H	H	0	0	0	18.48	0	0	1	0	0	-	-	0	0.126	0.0	0.0
1B6S	A	333	E	H	H	0	0	110	32.05	0	0	1	0	0	-	-	0	0.272	0.0	0.55
1B6S	A	334	A	H	H	0	0	41	21.08	0	0	1	0	0	-	-	0	0.154	0.0	0.205
1B6S	A	335	L	H	H	0	0	0	16.57	0	0	1	0	0	-	-	0	0.106	0.0	0.0
1B6S	A	336	I	G	H	0	0	42	23.34	0	0	1	0	0	-	-	0	0.178	0.0	0.21
1B6S	A	337	P	G	H	0	0	102	15.21	0	0	1	0	0	-	-	0	0.091	0.0	0.51
1B6S	A	338	L	G	H	0	0	38	23.8	0	0	1	0	0	-	-	0	0.183	0.0	0.19
1B6S	A	339	L	S	O	0	0	13	22.61	2	0	0	1	0	-	-	0	0.17	0.154	0.065
1B6S	A	340	P	U	O	0	0	45	15.34	2	0	0	1	0	-	-	0	0.093	0.154	0.225
1B6S	A	341	P	G	H	0	0	116	20.43	0	0	1	0	1	-	-	0	0.147	0.0	0.58
1B6S	A	342	E	G	H	0	0	81	40.15	0	0	1	0	1	-	-	0	0.358	0.0	0.405
1B6S	A	343	Y	G	H	0	0	7	13.02	0	0	1	0	1	-	-	0	0.068	0.0	0.035
1B6S	A	344	A	H	H	0	0	30	21.41	0	0	1	0	1	-	-	0	0.158	0.0	0.15
1B6S	A	345	S	H	H	0	0	60	27.58	0	0	1	0	1	-	-	0	0.224	0.0	0.3
1B6S	A	346	G	H	H	0	0	3	16.66	0	0	1	0	1	-	-	0	0.107	0.0	0.015
1B6S	A	347	V	H	H	0	0	1	16.94	0	0	1	0	1	-	-	0	0.11	0.0	0.005
1B6S	A	348	I	H	H	0	0	91	21.69	0	0	1	0	1	-	-	0	0.161	0.0	0.455
1B6S	A	349	W	H	H	0	0	57	32.54	0	0	1	0	1	-	-	0	0.277	0.0	0.285
1B6S	A	350	A	H	H	0	0	0	16.23	0	0	1	0	1	-	-	0	0.102	0.0	0.0
1B6S	A	351	Q	H	H	0	0	32	26.21	0	0	1	0	1	-	-	0	0.209	0.0	0.16
1B6S	A	352	S	H	H	0	0	76	35.81	0	0	1	0	1	-	-	0	0.312	0.0	0.38
1B6S	A	353	K	H	H	0	0	71	43.45	0	0	1	0	1	-	-	0	0.394	0.0	0.355
1B6S	A	354	F	T	O	0	0	19	33.84	2	0	0	1	1	-	-	0	0.291	0.154	0.095
1B6S	A	355	G	U	O	0	0	130	68.52	2	0	0	1	1	-	-	0	0.663	0.154	0.65
1BLF	A	5	N	U	O	0	0	79	73.37	1	0	0	1	1	-	-	0	0.422	0.05	0.395
1BLF	A	6	V	E	B	1	0	0	64.67	0	1	0	0	1	-	-	0	0.312	0.0	0.0
1BLF	A	7	R	E	B	1	0	56	73.02	0	1	0	0	1	-	-	0	0.417	0.0	0.28
1BLF	A	8	W	E	B	1	1	2	44.73	0	1	0	0	1	-	-	0	0.059	0.0	0.01
1BLF	A	9	C	E	B	1	0	0	53.52	0	1	0	0	1	-	-	0	0.17	0.0	0.0
1BLF	A	10	T	E	B	1	0	0	56.46	0	1	0	0	1	-	-	0	0.208	0.0	0.0
1BLF	A	11	I	S	O	0	0	22	59.9	2	0	0	1	1	-	-	0	0.251	0.1	0.11
1BLF	A	12	S	S	O	0	0	2	66.23	2	0	0	1	1	-	-	0	0.331	0.1	0.01
1BLF	A	13	Q	H	H	0	0	73	74.19	0	0	1	0	0	-	-	0	0.432	0.0	0.365
1BLF	A	14	P	H	H	0	0	27	54.26	0	0	1	0	0	-	-	0	0.18	0.0	0.135
1BLF	A	15	E	H	H	0	0	23	64.61	0	0	1	0	0	-	-	0	0.311	0.0	0.115
1BLF	A	16	W	H	H	0	0	59	73.01	0	0	1	0	0	-	-	0	0.417	0.0	0.295
1BLF	A	17	F	H	H	0	0	113	70.03	0	0	1	0	0	-	-	0	0.379	0.0	0.565
1BLF	A	18	K	H	H	0	0	6	58.78	0	0	1	0	0	-	-	0	0.237	0.0	0.03
1BLF	A	19	C	H	H	0	0	0	57.46	0	0	1	0	0	-	-	0	0.22	0.0	0.0
1BLF	A	20	R	H	H	0	0	88	82.28	0	0	1	0	0	-	-	0	0.535	0.0	0.44
1BLF	A	21	R	H	H	0	0	96	76.06	0	0	1	0	0	-	-	0	0.456	0.0	0.48
1BLF	A	22	W	H	H	0	0	0	60.95	0	0	1	0	0	-	-	0	0.264	0.0	0.0
1BLF	A	23	Q	H	H	0	0	28	77.13	0	0	1	0	0	-	-	0	0.469	0.0	0.14
1BLF	A	24	W	H	H	0	0	132	82.19	0	0	1	0	0	-	-	0	0.534	0.0	0.66
1BLF	A	25	R	H	H	0	0	77	96.54	0	0	1	0	0	-	-	0	0.715	0.0	0.385
1BLF	A	26	M	H	H	0	0	11	91.59	0	0	1	0	0	-	-	0	0.653	0.0	0.055
1BLF	A	27	K	G	H	0	0	124	102.23	0	0	1	0	0	-	-	0	0.788	0.0	0.62
1BLF	A	28	K	G	H	0	0	135	103.92	0	0	1	0	0	-	-	0	0.809	0.0	0.675
1BLF	A	29	L	G	H	0	0	60	97.57	0	0	1	0	0	-	-	0	0.728	0.0	0.3
1BLF	A	30	G	U	O	0	0	48	103.43	4	0	0	1	0	-	-	0	0.803	0.2	0.24
1BLF	A	31	A	S	O	0	0	65	97.31	4	0	0	1	0	-	-	0	0.725	0.2	0.325
1BLF	A	32	P	U	O	0	0	8	85.7	4	0	0	1	0	-	-	0	0.578	0.2	0.04
1BLF	A	33	S	U	O	0	0	63	74.03	4	0	0	1	0	-	-	0	0.43	0.2	0.315
1BLF	A	34	I	E	B	1	0	2	69.28	0	1	0	0	0	-	-	0	0.37	0.0	0.01
1BLF	A	35	T	E	B	1	0	50	65.27	0	1	0	0	0	-	-	0	0.319	0.0	0.25
1BLF	A	36	C	E	B	1	0	14	61.48	0	1	0	0	0	-	-	0	0.271	0.0	0.07
1BLF	A	37	V	E	B	1	0	22	61.18	0	1	0	0	0	-	-	0	0.267	0.0	0.11
1BLF	A	38	R	E	B	1	0	79	80.18	0	1	0	0	0	-	-	0	0.508	0.0	0.395
1BLF	A	39	R	U	O	0	0	73	71.76	3	0	0	1	0	-	-	0	0.401	0.15	0.365
1BLF	A	40	A	S	O	0	0	33	66.19	3	0	0	1	0	-	-	0	0.331	0.15	0.165
1BLF	A	41	F	S	O	0	0	82	73.77	3	0	0	1	0	-	-	0	0.427	0.15	0.41
1BLF	A	42	A	H	H	0	0	25	60.87	0	0	1	0	0	-	-	0	0.263	0.0	0.125
1BLF	A	43	L	H	H	0	0	59	63.86	0	0	1	0	0	-	-	0	0.301	0.0	0.295
1BLF	A	44	E	H	H	0	0	52	62.83	0	0	1	0	0	-	-	0	0.288	0.0	0.26
1BLF	A	45	C	H	H	0	0	0	55.78	0	0	1	0	0	-	-	0	0.199	0.0	0.0
1BLF	A	46	I	H	H	0	0	0	57.77	0	0	1	0	0	-	-	0	0.224	0.0	0.0
1BLF	A	47	R	H	H	0	0	86	83.22	0	0	1	0	0	-	-	0	0.547	0.0	0.43
1BLF	A	48	A	H	H	0	0	0	56.22	0	0	1	0	0	-	-	0	0.205	0.0	0.0
1BLF	A	49	I	H	H	0	0	0	60.22	0	0	1	0	0	-	-	0	0.255	0.0	0.0
1BLF	A	50	A	H	H	0	0	31	66.37	0	0	1	0	0	-	-	0	0.333	0.0	0.155
1BLF	A	51	E	T	O	0	0	109	77.35	6	0	0	1	0	-	-	0	0.472	0.3	0.545
1BLF	A	52	K	T	O	0	0	116	79.68	6	0	0	1	0	-	-	0	0.502	0.3	0.58
1BLF	A	53	K	S	O	0	0	114	81.27	6	0	0	1	0	-	-	0	0.522	0.3	0.57
1BLF	A	54	A	U	O	0	0	0	62.75	6	0	0	1	0	-	-	0	0.287	0.3	0.0
1BLF	A	55	D	U	O	0	0	0	60.05	6	0	0	1	0	-	-	0	0.253	0.3	0.0
1BLF	A	56	A	B	O	1	0	0	53.84	6	0	0	1	0	-	-	0	0.174	0.3	0.0
1BLF	A	57	V	E	B	1	0	9	48.11	0	1	0	0	0	-	-	0	0.102	0.0	0.045
1BLF	A	58	T	E	B	1	0	23	44.15	0	1	0	0	0	-	-	0	0.052	0.0	0.115
1BLF	A	59	L	E	B	1	0	7	44.68	0	1	0	0	0	-	-	0	0.058	0.0	0.035
1BLF	A	60	D	U	O	0	0	9	47.2	1	0	0	1	0	-	-	0	0.09	0.05	0.045
1BLF	A	61	G	H	H	0	0	0	50.56	0	0	1	0	0	-	-	0	0.133	0.0	0.0
1BLF	A	62	G	H	H	0	0	5	48.05	0	0	1	0	0	-	-	0	0.101	0.0	0.025
1BLF	A	63	M	H	H	0	0	41	54.31	0	0	1	0	0	-	-	0	0.18	0.0	0.205
1BLF	A	64	V	H	H	0	0	1	49.63	0	0	1	0	0	-	-	0	0.121	0.0	0.005
1BLF	A	65	F	H	H	0	0	25	51.74	0	0	1	0	0	-	-	0	0.148	0.0	0.125
1BLF	A	66	E	H	H	0	0	38	59.38	0	0	1	0	0	-	-	0	0.245	0.0	0.19
1BLF	A	67	A	H	H	0	0	0	51.99	0	0	1	0	0	-	-	0	0.151	0.0	0.0
1BLF	A	68	G	H	H	0	0	21	55.78	0	0	1	0	0	-	-	0	0.199	0.0	0.105
1BLF	A	69	R	S	O	0	0	111	63.06	5	0	0	1	0	-	-	0	0.291	0.25	0.555
1BLF	A	70	D	T	O	0	0	122	66.61	5	0	0	1	0	-	-	0	0.336	0.25	0.61
1BLF	A	71	P	T	O	0	0	100	60.26	5	0	0	1	0	-	-	0	0.256	0.25	0.5
1BLF	A	72	Y	T	O	0	0	53	55.32	5	0	0	1	0	-	-	0	0.193	0.25	0.265
1BLF	A	73	K	U	O	0	0	114	77.14	5	0	0	1	0	-	-	0	0.47	0.25	0.57
1BLF	A	74	L	E	B	1	0	3	58.64	0	1	0	0	0	-	-	0	0.235	0.0	0.015
1BLF	A	75	R	E	B	1	0	23	63.01	0	1	0	0	0	-	-	0	0.291	0.0	0.115
1BLF	A	76	P	E	B	1	0	0	49.35	0	1	0	0	0	-	-	0	0.117	0.0	0.0
1BLF	A	77	V	E	B	0	0	5	50.64	0	1	0	0	0	-	-	0	0.134	0.0	0.025
1BLF	A	78	A	E	B	1	1	0	50.73	0	1	0	0	0	-	-	0	0.135	0.0	0.0
1BLF	A	79	A	E	B	1	1	1	54.47	0	1	0	0	0	-	-	0	0.182	0.0	0.005
1BLF	A	80	E	E	B	0	1	0	58.68	0	1	0	0	0	-	-	0	0.236	0.0	0.0
1BLF	A	81	I	E	B	0	1	25	58.07	0	1	0	0	0	-	-	0	0.228	0.0	0.125
1BLF	A	82	Y	E	B	1	0	7	57.39	0	1	0	0	0	-	-	0	0.219	0.0	0.035
1BLF	A	83	G	E	B	1	0	28	69.21	0	1	0	0	0	-	-	0	0.369	0.0	0.14
1BLF	A	84	T	U	O	0	0	62	77.98	4	0	0	1	0	-	-	0	0.48	0.2	0.31
1BLF	A	85	K	S	O	0	0	160	96.96	4	0	0	1	0	-	-	0	0.721	0.2	0.8
1BLF	A	86	E	S	O	0	0	158	102.38	4	0	0	1	0	-	-	0	0.789	0.2	0.79
1BLF	A	87	S	S	O	0	0	62	90.08	4	0	0	1	0	-	-	0	0.634	0.2	0.31
1BLF	A	88	P	E	B	1	0	67	79.79	0	1	0	0	0	-	-	0	0.503	0.0	0.335
1BLF	A	89	Q	E	B	1	0	32	76.64	0	1	0	0	0	-	-	0	0.463	0.0	0.16
1BLF	A	90	T	S	O	0	0	26	70.31	1	0	0	1	0	-	-	0	0.383	0.05	0.13
1BLF	A	91	H	E	B	1	0	36	70.78	0	1	0	0	0	-	-	0	0.389	0.0	0.18
1BLF	A	92	Y	E	B	1	0	0	58.83	0	1	0	0	0	-	-	0	0.238	0.0	0.0
1BLF	A	93	Y	E	B	1	0	14	76.28	0	1	0	0	0	-	-	0	0.459	0.0	0.07
1BLF	A	94	A	E	B	1	1	0	72.66	0	1	0	0	0	-	-	0	0.413	0.0	0.0
1BLF	A	95	V	E	B	0	1	2	75.24	0	1	0	0	0	-	-	0	0.446	0.0	0.01
1BLF	A	96	A	E	B	0	1	0	80.67	0	1	0	0	0	-	-	0	0.514	0.0	0.0
1BLF	A	97	V	E	B	1	1	4	85.04	0	1	0	0	0	-	-	0	0.57	0.0	0.02
1BLF	A	98	V	E	B	1	1	0	87.62	0	1	0	0	0	-	-	0	0.602	0.0	0.0
1BLF	A	99	K	E	B	1	0	74	103.05	0	1	0	0	0	-	-	0	0.798	0.0	0.37
1BLF	A	100	K	S	O	0	0	114	106.86	14	0	0	1	0	-	-	0	0.846	0.7	0.57
1BLF	A	101	G	S	O	0	0	73	105.26	14	0	0	1	0	-	-	0	0.826	0.7	0.365
1BLF	A	102	S	U	O	0	0	33	107.72	14	0	0	1	0	-	-	0	0.857	0.7	0.165
1BLF	A	103	N	U	O	0	0	155	112.24	14	0	0	1	0	-	-	0	0.914	0.7	0.775
1BLF	A	104	F	U	O	0	0	2	104.62	14	0	0	1	0	-	-	0	0.818	0.7	0.01
1BLF	A	105	Q	U	O	0	0	42	104.9	14	0	0	1	0	-	-	0	0.821	0.7	0.21
1BLF	A	106	L	S	O	0	0	4	99.15	14	0	0	1	0	-	-	0	0.748	0.7	0.02
1BLF	A	107	D	T	O	0	0	62	103.83	14	0	0	1	0	-	-	0	0.808	0.7	0.31
1BLF	A	108	Q	T	O	0	0	99	99.08	14	0	0	1	0	-	-	0	0.748	0.7	0.495
1BLF	A	109	L	U	O	0	0	0	96.04	14	0	0	1	0	-	-	0	0.709	0.7	0.0
1BLF	A	110	Q	T	O	0	0	127	103.66	14	0	0	1	0	-	-	0	0.806	0.7	0.635
1BLF	A	111	G	T	O	0	0	46	98.06	14	0	0	1	0	-	-	0	0.735	0.7	0.23
1BLF	A	112	R	U	O	0	0	75	99.12	14	0	0	1	0	-	-	0	0.748	0.7	0.375
1BLF	A	113	K	U	O	0	0	72	87.18	14	0	0	1	0	-	-	0	0.597	0.7	0.36
1BLF	A	114	S	E	B	1	1	0	78.26	0	1	0	0	0	-	-	0	0.484	0.0	0.0
1BLF	A	115	C	E	B	1	1	0	75.48	0	1	0	0	0	-	-	0	0.449	0.0	0.0
1BLF	A	116	H	E	B	0	1	1	72.15	0	1	0	0	0	-	-	0	0.406	0.0	0.005
1BLF	A	117	T	S	O	0	0	0	68.79	5	0	0	1	0	-	-	0	0.364	0.25	0.0
1BLF	A	118	G	U	O	0	0	0	66.34	5	0	0	1	0	-	-	0	0.333	0.25	0.0
1BLF	A	119	L	T	O	0	0	46	61.03	5	0	0	1	0	-	-	0	0.265	0.25	0.23
1BLF	A	120	G	T	O	0	0	22	61.79	5	0	0	1	0	-	-	0	0.275	0.25	0.11
1BLF	A	121	R	U	O	0	0	38	67.43	5	0	0	1	0	-	-	0	0.347	0.25	0.19
1BLF	A	122	S	I	H	0	0	0	54.01	0	0	1	0	0	-	-	0	0.177	0.0	0.0
1BLF	A	123	A	I	H	0	0	1	54.81	0	0	1	0	0	-	-	0	0.187	0.0	0.005
1BLF	A	124	G	I	H	0	0	0	61.77	0	0	1	0	0	-	-	0	0.275	0.0	0.0
1BLF	A	125	W	I	H	0	0	19	62.22	0	0	1	0	0	-	-	0	0.281	0.0	0.095
1BLF	A	126	I	I	H	0	0	10	61.35	0	0	1	0	0	-	-	0	0.27	0.0	0.05
1BLF	A	127	I	H	H	0	0	12	60.97	0	0	1	0	0	-	-	0	0.265	0.0	0.06
1BLF	A	128	P	H	H	0	0	2	65.07	0	0	1	0	0	-	-	0	0.317	0.0	0.01
1BLF	A	129	M	H	H	0	0	0	73.66	0	0	1	0	0	-	-	0	0.425	0.0	0.0
1BLF	A	130	G	H	H	0	0	35	71.16	0	0	1	0	0	-	-	0	0.394	0.0	0.175
1BLF	A	131	I	H	H	0	0	54	69.41	0	0	1	0	0	-	-	0	0.372	0.0	0.27
1BLF	A	132	L	H	H	0	0	3	70.48	0	0	1	0	0	-	-	0	0.385	0.0	0.015
1BLF	A	133	R	H	H	0	0	45	68.44	0	0	1	0	0	-	-	0	0.359	0.0	0.225
1BLF	A	134	P	H	H	0	0	102	74.89	0	0	1	0	0	-	-	0	0.441	0.0	0.51
1BLF	A	135	Y	H	H	0	0	84	81.05	0	0	1	0	0	-	-	0	0.519	0.0	0.42
1BLF	A	136	L	H	H	0	0	6	85.33	0	0	1	0	0	-	-	0	0.573	0.0	0.03
1BLF	A	137	S	T	O	0	0	87	89.27	8	0	0	1	0	-	-	0	0.623	0.4	0.435
1BLF	A	138	W	U	O	0	0	32	72.62	8	0	0	1	0	-	-	0	0.412	0.4	0.16
1BLF	A	139	T	U	O	0	0	85	83.88	8	0	0	1	0	-	-	0	0.555	0.4	0.425
1BLF	A	140	E	T	O	0	0	56	88.92	8	0	0	1	0	-	-	0	0.619	0.4	0.28
1BLF	A	141	S	T	O	0	0	119	98.32	8	0	0	1	0	-	-	0	0.738	0.4	0.595
1BLF	A	142	L	T	O	0	0	145	97.73	8	0	0	1	0	-	-	0	0.73	0.4	0.725
1BLF	A	143	E	S	O	0	0	38	97.8	8	0	0	1	0	-	-	0	0.731	0.4	0.19
1BLF	A	144	P	U	O	0	0	59	85.02	8	0	0	1	0	-	-	0	0.569	0.4	0.295
1BLF	A	145	L	H	H	0	0	18	78.92	0	0	1	0	0	-	-	0	0.492	0.0	0.09
1BLF	A	146	Q	H	H	0	0	56	86.87	0	0	1	0	0	-	-	0	0.593	0.0	0.28
1BLF	A	147	G	H	H	0	0	6	76.53	0	0	1	0	0	-	-	0	0.462	0.0	0.03
1BLF	A	148	A	H	H	0	0	0	70.94	0	0	1	0	0	-	-	0	0.391	0.0	0.0
1BLF	A	149	V	H	H	0	0	0	71.41	0	0	1	0	0	-	-	0	0.397	0.0	0.0
1BLF	A	150	A	H	H	0	0	8	77.48	0	0	1	0	0	-	-	0	0.474	0.0	0.04
1BLF	A	151	K	T	O	0	0	124	91.05	5	0	0	1	0	-	-	0	0.646	0.25	0.62
1BLF	A	152	F	T	O	0	0	6	78.82	5	0	0	1	0	-	-	0	0.491	0.25	0.03
1BLF	A	153	F	S	O	0	0	3	85.21	5	0	0	1	0	-	-	0	0.572	0.25	0.015
1BLF	A	154	S	S	O	0	0	55	90.48	5	0	0	1	0	-	-	0	0.639	0.25	0.275
1BLF	A	155	A	S	O	0	0	2	86.45	5	0	0	1	0	-	-	0	0.588	0.25	0.01
1BLF	A	156	S	E	B	1	0	0	84.92	0	1	0	0	0	-	-	0	0.568	0.0	0.0
1BLF	A	157	C	E	B	1	0	1	78.5	0	1	0	0	0	-	-	0	0.487	0.0	0.005
1BLF	A	158	V	U	O	0	0	1	69.02	9	0	0	1	0	-	-	0	0.367	0.45	0.005
1BLF	A	159	P	T	O	0	0	0	64.99	9	0	0	1	0	-	-	0	0.316	0.45	0.0
1BLF	A	160	C	T	O	0	0	40	71.59	9	0	0	1	0	-	-	0	0.399	0.45	0.2
1BLF	A	161	I	S	O	0	0	8	84.96	9	0	0	1	0	-	-	0	0.569	0.45	0.04
1BLF	A	162	D	U	O	0	0	95	103.02	9	0	0	1	0	-	-	0	0.798	0.45	0.475
1BLF	A	163	R	T	O	0	0	107	106.72	9	0	0	1	0	-	-	0	0.844	0.45	0.535
1BLF	A	164	Q	T	O	0	0	183	104.92	9	0	0	1	0	-	-	0	0.822	0.45	0.915
1BLF	A	165	A	T	O	0	0	51	90.54	9	0	0	1	0	-	-	0	0.639	0.45	0.255
1BLF	A	166	Y	U	O	0	0	45	87.61	9	0	0	1	0	-	-	0	0.602	0.45	0.225
1BLF	A	167	P	G	H	0	0	76	88.62	0	0	1	0	0	-	-	0	0.615	0.0	0.38
1BLF	A	168	N	G	H	0	0	40	85.18	0	0	1	0	0	-	-	0	0.571	0.0	0.2
1BLF	A	169	L	G	H	0	0	2	76.19	0	0	1	0	0	-	-	0	0.458	0.0	0.01
1BLF	A	170	C	S	O	0	0	1	81.07	20	0	0	1	0	-	-	0	0.519	1.0	0.005
1BLF	A	171	Q	T	O	0	0	120	94.35	20	0	0	1	0	-	-	0	0.688	1.0	0.6
1BLF	A	172	L	T	O	0	0	25	82.37	20	0	0	1	0	-	-	0	0.536	1.0	0.125
1BLF	A	173	C	U	O	0	0	13	83.46	20	0	0	1	0	-	-	0	0.55	1.0	0.065
1BLF	A	174	K	U	O	0	0	112	100.85	20	0	0	1	0	-	-	0	0.77	1.0	0.56
1BLF	A	175	G	U	O	0	0	17	100.84	20	0	0	1	0	-	-	0	0.77	1.0	0.085
1BLF	A	176	E	U	O	0	0	162	110.08	20	0	0	1	0	-	-	0	0.887	1.0	0.81
1BLF	A	177	G	T	O	0	0	50	104.14	20	0	0	1	0	-	-	0	0.812	1.0	0.25
1BLF	A	178	E	T	O	0	0	168	109.73	20	0	0	1	0	-	-	0	0.883	1.0	0.84
1BLF	A	179	N	S	O	0	0	61	98.39	20	0	0	1	0	-	-	0	0.739	1.0	0.305
1BLF	A	180	Q	T	O	0	0	46	94.22	20	0	0	1	0	-	-	0	0.686	1.0	0.23
1BLF	A	181	C	T	O	0	0	6	80.82	20	0	0	1	0	-	-	0	0.516	1.0	0.03
1BLF	A	182	A	U	O	0	0	22	74.34	20	0	0	1	0	-	-	0	0.434	1.0	0.11
1BLF	A	183	C	S	O	0	0	39	69.12	20	0	0	1	0	-	-	0	0.368	1.0	0.195
1BLF	A	184	S	S	O	0	0	4	69.5	20	0	0	1	0	-	-	0	0.373	1.0	0.02
1BLF	A	185	S	T	O	0	0	34	78.52	20	0	0	1	0	-	-	0	0.487	1.0	0.17
1BLF	A	186	R	T	O	0	0	116	97.97	20	0	0	1	0	-	-	0	0.734	1.0	0.58
1BLF	A	187	E	S	O	0	0	1	79.79	20	0	0	1	0	-	-	0	0.503	1.0	0.005
1BLF	A	188	P	T	O	0	0	38	79.54	20	0	0	1	0	-	-	0	0.5	1.0	0.19
1BLF	A	189	Y	T	O	0	0	8	80.55	20	0	0	1	0	-	-	0	0.513	1.0	0.04
1BLF	A	190	F	U	O	0	0	37	70.67	20	0	0	1	0	-	-	0	0.388	1.0	0.185
1BLF	A	191	G	H	H	0	0	9	55.15	0	0	1	0	0	-	-	0	0.191	0.0	0.045
1BLF	A	192	Y	H	H	0	0	2	55.25	0	0	1	0	0	-	-	0	0.192	0.0	0.01
1BLF	A	193	S	H	H	0	0	14	65.75	0	0	1	0	0	-	-	0	0.325	0.0	0.07
1BLF	A	194	G	H	H	0	0	7	64.48	0	0	1	0	0	-	-	0	0.309	0.0	0.035
1BLF	A	195	A	H	H	0	0	0	67.25	0	0	1	0	0	-	-	0	0.344	0.0	0.0
1BLF	A	196	F	H	H	0	0	2	74.58	0	0	1	0	0	-	-	0	0.437	0.0	0.01
1BLF	A	197	K	H	H	0	0	66	91.92	0	0	1	0	0	-	-	0	0.657	0.0	0.33
1BLF	A	198	C	H	H	0	0	1	79.34	0	0	1	0	0	-	-	0	0.497	0.0	0.005
1BLF	A	199	L	H	H	0	0	2	85.87	0	0	1	0	0	-	-	0	0.58	0.0	0.01
1BLF	A	200	Q	H	H	0	0	79	98.78	0	0	1	0	0	-	-	0	0.744	0.0	0.395
1BLF	A	201	D	T	O	0	0	89	85.91	5	0	0	1	0	-	-	0	0.581	0.25	0.445
1BLF	A	202	G	T	O	0	0	45	91.98	5	0	0	1	0	-	-	0	0.658	0.25	0.225
1BLF	A	203	A	S	O	0	0	24	90.14	5	0	0	1	0	-	-	0	0.634	0.25	0.12
1BLF	A	204	G	U	O	0	0	6	84.88	5	0	0	1	0	-	-	0	0.568	0.25	0.03
1BLF	A	205	D	S	O	0	0	41	87.74	5	0	0	1	0	-	-	0	0.604	0.25	0.205
1BLF	A	206	V	E	B	1	1	0	74.26	0	1	0	0	0	-	-	0	0.433	0.0	0.0
1BLF	A	207	A	E	B	1	1	0	66.14	0	1	0	0	0	-	-	0	0.33	0.0	0.0
1BLF	A	208	F	E	B	1	1	2	62.71	0	1	0	0	0	-	-	0	0.287	0.0	0.01
1BLF	A	209	V	E	B	1	0	0	64.86	0	1	0	0	0	-	-	0	0.314	0.0	0.0
1BLF	A	210	K	E	B	1	0	3	64.0	0	1	0	0	0	-	-	0	0.303	0.0	0.015
1BLF	A	211	E	T	O	0	0	9	73.57	2	0	0	1	0	-	-	0	0.424	0.1	0.045
1BLF	A	212	T	T	O	0	0	44	72.18	2	0	0	1	0	-	-	0	0.407	0.1	0.22
1BLF	A	213	T	H	H	0	0	1	73.44	0	0	1	0	0	-	-	0	0.423	0.0	0.005
1BLF	A	214	V	H	H	0	0	6	75.61	0	0	1	0	0	-	-	0	0.45	0.0	0.03
1BLF	A	215	F	H	H	0	0	68	82.0	0	0	1	0	0	-	-	0	0.531	0.0	0.34
1BLF	A	216	E	H	H	0	0	54	85.6	0	0	1	0	0	-	-	0	0.577	0.0	0.27
1BLF	A	217	N	H	H	0	0	38	86.98	0	0	1	0	0	-	-	0	0.594	0.0	0.19
1BLF	A	218	L	U	O	0	0	6	81.97	3	0	0	1	0	-	-	0	0.531	0.15	0.03
1BLF	A	219	P	U	O	0	0	95	87.24	3	0	0	1	0	-	-	0	0.598	0.15	0.475
1BLF	A	220	E	S	O	0	0	137	101.38	3	0	0	1	0	-	-	0	0.777	0.15	0.685
1BLF	A	221	K	H	H	0	0	119	104.32	0	0	1	0	0	-	-	0	0.814	0.0	0.595
1BLF	A	222	A	H	H	0	0	75	107.08	0	0	1	0	0	-	-	0	0.849	0.0	0.375
1BLF	A	223	D	H	H	0	0	85	110.34	0	0	1	0	0	-	-	0	0.89	0.0	0.425
1BLF	A	224	R	H	H	0	0	35	105.77	0	0	1	0	0	-	-	0	0.832	0.0	0.175
1BLF	A	225	D	T	O	0	0	78	112.06	2	0	0	1	0	-	-	0	0.912	0.1	0.39
1BLF	A	226	Q	T	O	0	0	74	110.37	2	0	0	1	0	-	-	0	0.891	0.1	0.37
1BLF	A	227	Y	E	B	1	0	5	101.48	0	1	0	0	0	-	-	0	0.778	0.0	0.025
1BLF	A	228	E	E	B	1	0	37	103.17	0	1	0	0	0	-	-	0	0.799	0.0	0.185
1BLF	A	229	L	E	B	1	1	5	85.84	0	1	0	0	0	-	-	0	0.58	0.0	0.025
1BLF	A	230	L	U	O	0	0	0	84.29	18	0	0	1	0	-	-	0	0.56	0.9	0.0
1BLF	A	231	C	U	O	0	0	11	81.65	18	0	0	1	0	-	-	0	0.527	0.9	0.055
1BLF	A	232	L	T	O	0	0	78	89.56	18	0	0	1	0	-	-	0	0.627	0.9	0.39
1BLF	A	233	N	T	O	0	0	119	98.86	18	0	0	1	0	-	-	0	0.745	0.9	0.595
1BLF	A	234	N	S	O	0	0	45	97.22	18	0	0	1	0	-	-	0	0.724	0.9	0.225
1BLF	A	235	S	U	O	0	0	30	91.36	18	0	0	1	0	-	-	0	0.65	0.9	0.15
1BLF	A	236	R	U	O	0	0	41	81.84	18	0	0	1	0	-	-	0	0.529	0.9	0.205
1BLF	A	237	A	B	O	1	0	14	82.42	18	0	0	1	0	-	-	0	0.536	0.9	0.07
1BLF	A	238	P	U	O	0	0	71	87.83	18	0	0	1	0	-	-	0	0.605	0.9	0.355
1BLF	A	239	V	T	O	0	0	8	89.2	18	0	0	1	0	-	-	0	0.622	0.9	0.04
1BLF	A	240	D	T	O	0	0	87	94.15	18	0	0	1	0	-	-	0	0.685	0.9	0.435
1BLF	A	241	A	U	O	0	0	31	85.63	18	0	0	1	0	-	-	0	0.577	0.9	0.155
1BLF	A	242	F	T	O	0	0	47	80.11	18	0	0	1	0	-	-	0	0.507	0.9	0.235
1BLF	A	243	K	T	O	0	0	138	98.26	18	0	0	1	0	-	-	0	0.737	0.9	0.69
1BLF	A	244	E	T	O	0	0	180	102.52	18	0	0	1	0	-	-	0	0.791	0.9	0.9
1BLF	A	245	C	S	O	0	0	3	83.8	18	0	0	1	0	-	-	0	0.554	0.9	0.015
1BLF	A	246	H	U	O	0	0	49	81.53	18	0	0	1	0	-	-	0	0.525	0.9	0.245
1BLF	A	247	L	S	O	0	0	15	74.58	18	0	0	1	0	-	-	0	0.437	0.9	0.075
1BLF	A	248	A	E	B	1	0	28	64.32	0	1	0	0	0	-	-	0	0.307	0.0	0.14
1BLF	A	249	Q	E	B	1	0	96	71.13	0	1	0	0	0	-	-	0	0.393	0.0	0.48
1BLF	A	250	V	E	B	1	0	0	57.76	0	1	0	0	0	-	-	0	0.224	0.0	0.0
1BLF	A	251	P	E	B	1	0	22	50.52	0	1	0	0	0	-	-	0	0.132	0.0	0.11
1BLF	A	252	S	U	O	0	0	0	50.76	2	0	0	1	0	-	-	0	0.135	0.1	0.0
1BLF	A	253	H	U	O	0	0	16	48.77	2	0	0	1	0	-	-	0	0.11	0.1	0.08
1BLF	A	254	A	E	B	1	1	0	48.98	0	1	0	0	0	-	-	0	0.113	0.0	0.0
1BLF	A	255	V	E	B	1	1	0	49.85	0	1	0	0	0	-	-	0	0.124	0.0	0.0
1BLF	A	256	V	E	B	1	1	1	50.98	0	1	0	0	0	-	-	0	0.138	0.0	0.005
1BLF	A	257	A	E	B	0	1	0	46.19	0	1	0	0	0	-	-	0	0.077	0.0	0.0
1BLF	A	258	R	E	B	0	1	14	57.59	0	1	0	0	0	-	-	0	0.222	0.0	0.07
1BLF	A	259	S	S	O	0	0	61	70.84	5	0	0	1	0	-	-	0	0.39	0.25	0.305
1BLF	A	260	V	S	O	0	0	109	80.17	5	0	0	1	0	-	-	0	0.508	0.25	0.545
1BLF	A	261	D	S	O	0	0	128	92.22	5	0	0	1	0	-	-	0	0.661	0.25	0.64
1BLF	A	262	G	U	O	0	0	2	79.87	5	0	0	1	0	-	-	0	0.504	0.25	0.01
1BLF	A	263	K	U	O	0	0	59	84.01	5	0	0	1	0	-	-	0	0.557	0.25	0.295
1BLF	A	264	E	H	H	0	0	45	88.63	0	0	1	0	0	-	-	0	0.615	0.0	0.225
1BLF	A	265	D	H	H	0	0	107	90.76	0	0	1	0	0	-	-	0	0.642	0.0	0.535
1BLF	A	266	L	H	H	0	0	63	70.11	0	0	1	0	0	-	-	0	0.381	0.0	0.315
1BLF	A	267	I	H	H	0	0	0	58.87	0	0	1	0	0	-	-	0	0.238	0.0	0.0
1BLF	A	268	W	H	H	0	0	51	57.86	0	0	1	0	0	-	-	0	0.225	0.0	0.255
1BLF	A	269	K	H	H	0	0	73	77.36	0	0	1	0	0	-	-	0	0.472	0.0	0.365
1BLF	A	270	L	H	H	0	0	2	67.31	0	0	1	0	0	-	-	0	0.345	0.0	0.01
1BLF	A	271	L	H	H	0	0	0	65.08	0	0	1	0	0	-	-	0	0.317	0.0	0.0
1BLF	A	272	S	H	H	0	0	23	74.3	0	0	1	0	0	-	-	0	0.434	0.0	0.115
1BLF	A	273	K	H	H	0	0	80	87.42	0	0	1	0	0	-	-	0	0.6	0.0	0.4
1BLF	A	274	A	H	H	0	0	0	74.58	0	0	1	0	0	-	-	0	0.437	0.0	0.0
1BLF	A	275	Q	H	H	0	0	44	79.86	0	0	1	0	0	-	-	0	0.504	0.0	0.22
1BLF	A	276	E	H	H	0	0	104	92.35	0	0	1	0	0	-	-	0	0.662	0.0	0.52
1BLF	A	277	K	H	H	0	0	86	90.11	0	0	1	0	0	-	-	0	0.634	0.0	0.43
1BLF	A	278	F	S	O	0	0	9	79.68	20	0	0	1	0	-	-	0	0.502	1.0	0.045
1BLF	A	279	G	S	O	0	0	6	84.18	20	0	0	1	0	-	-	0	0.559	1.0	0.03
1BLF	A	280	K	T	O	0	0	80	104.39	20	0	0	1	0	-	-	0	0.815	1.0	0.4
1BLF	A	281	N	T	O	0	0	145	110.6	20	0	0	1	0	-	-	0	0.894	1.0	0.725
1BLF	A	282	K	U	O	0	0	96	108.2	20	0	0	1	0	-	-	0	0.863	1.0	0.48
1BLF	A	283	S	U	O	0	0	34	108.59	20	0	0	1	0	-	-	0	0.868	1.0	0.17
1BLF	A	284	R	S	O	0	0	200	109.41	20	0	0	1	0	-	-	0	0.878	1.0	1.0
1BLF	A	285	S	S	O	0	0	86	102.68	20	0	0	1	0	-	-	0	0.793	1.0	0.43
1BLF	A	286	F	U	O	0	0	7	90.83	20	0	0	1	0	-	-	0	0.643	1.0	0.035
1BLF	A	287	Q	U	O	0	0	123	94.5	20	0	0	1	0	-	-	0	0.69	1.0	0.615
1BLF	A	288	L	T	O	0	0	0	73.07	20	0	0	1	0	-	-	0	0.418	1.0	0.0
1BLF	A	289	F	T	O	0	0	10	70.85	20	0	0	1	0	-	-	0	0.39	1.0	0.05
1BLF	A	290	G	U	O	0	0	14	73.22	20	0	0	1	0	-	-	0	0.42	1.0	0.07
1BLF	A	291	S	U	O	0	0	13	76.3	20	0	0	1	0	-	-	0	0.459	1.0	0.065
1BLF	A	292	P	U	O	0	0	39	78.61	20	0	0	1	0	-	-	0	0.488	1.0	0.195
1BLF	A	293	P	T	O	0	0	112	75.1	20	0	0	1	0	-	-	0	0.444	1.0	0.56
1BLF	A	294	G	T	O	0	0	53	82.64	20	0	0	1	0	-	-	0	0.539	1.0	0.265
1BLF	A	295	Q	S	O	0	0	75	90.54	20	0	0	1	0	-	-	0	0.639	1.0	0.375
1BLF	A	296	R	U	O	0	0	82	79.47	20	0	0	1	0	-	-	0	0.499	1.0	0.41
1BLF	A	297	D	U	O	0	0	30	54.25	20	0	0	1	0	-	-	0	0.18	1.0	0.15
1BLF	A	298	L	U	O	0	0	4	61.52	20	0	0	1	0	-	-	0	0.272	1.0	0.02
1BLF	A	299	L	S	O	0	0	9	54.11	20	0	0	1	0	-	-	0	0.178	1.0	0.045
1BLF	A	300	F	S	O	0	0	4	56.95	20	0	0	1	0	-	-	0	0.214	1.0	0.02
1BLF	A	301	K	U	O	0	0	6	62.45	20	0	0	1	0	-	-	0	0.283	1.0	0.03
1BLF	A	302	D	T	O	0	0	13	63.28	20	0	0	1	0	-	-	0	0.294	1.0	0.065
1BLF	A	303	S	T	O	0	0	75	80.95	20	0	0	1	0	-	-	0	0.518	1.0	0.375
1BLF	A	304	A	U	O	0	0	0	74.37	20	0	0	1	0	-	-	0	0.434	1.0	0.0
1BLF	A	305	L	U	O	0	0	35	72.45	20	0	0	1	0	-	-	0	0.41	1.0	0.175
1BLF	A	306	G	E	B	1	0	2	62.34	0	1	0	0	0	-	-	0	0.282	0.0	0.01
1BLF	A	307	F	E	B	1	0	8	60.35	0	1	0	0	0	-	-	0	0.257	0.0	0.04
1BLF	A	308	L	E	B	1	0	48	58.66	0	1	0	0	0	-	-	0	0.235	0.0	0.24
1BLF	A	309	R	E	B	1	0	125	71.05	0	1	0	0	0	-	-	0	0.392	0.0	0.625
1BLF	A	310	I	U	O	0	0	4	57.46	6	0	0	1	0	-	-	0	0.22	0.3	0.02
1BLF	A	311	P	U	O	0	0	25	59.09	6	0	0	1	0	-	-	0	0.241	0.3	0.125
1BLF	A	312	S	T	O	0	0	80	64.32	6	0	0	1	0	-	-	0	0.307	0.3	0.4
1BLF	A	313	K	T	O	0	0	89	76.81	6	0	0	1	0	-	-	0	0.465	0.3	0.445
1BLF	A	314	V	U	O	0	0	0	61.26	6	0	0	1	0	-	-	0	0.268	0.3	0.0
1BLF	A	315	D	U	O	0	0	48	62.63	6	0	0	1	0	-	-	0	0.286	0.3	0.24
1BLF	A	316	S	H	H	0	0	12	62.66	0	0	1	0	0	-	-	0	0.286	0.0	0.06
1BLF	A	317	A	H	H	0	0	17	55.19	0	0	1	0	0	-	-	0	0.191	0.0	0.085
1BLF	A	318	L	H	H	0	0	11	52.49	0	0	1	0	0	-	-	0	0.157	0.0	0.055
1BLF	A	319	Y	H	H	0	0	25	60.7	0	0	1	0	0	-	-	0	0.261	0.0	0.125
1BLF	A	320	L	H	H	0	0	8	54.14	0	0	1	0	0	-	-	0	0.178	0.0	0.04
1BLF	A	321	G	H	H	0	0	24	67.8	0	0	1	0	0	-	-	0	0.351	0.0	0.12
1BLF	A	322	S	H	H	0	0	30	73.07	0	0	1	0	0	-	-	0	0.418	0.0	0.15
1BLF	A	323	R	H	H	0	0	193	91.99	0	0	1	0	0	-	-	0	0.658	0.0	0.965
1BLF	A	324	Y	H	H	0	0	13	69.21	0	0	1	0	0	-	-	0	0.369	0.0	0.065
1BLF	A	325	L	H	H	0	0	8	63.56	0	0	1	0	0	-	-	0	0.298	0.0	0.04
1BLF	A	326	T	H	H	0	0	37	67.89	0	0	1	0	0	-	-	0	0.352	0.0	0.185
1BLF	A	327	T	H	H	0	0	54	69.66	0	0	1	0	0	-	-	0	0.375	0.0	0.27
1BLF	A	328	L	H	H	0	0	9	69.82	0	0	1	0	0	-	-	0	0.377	0.0	0.045
1BLF	A	329	K	H	H	0	0	72	80.83	0	0	1	0	0	-	-	0	0.516	0.0	0.36
1BLF	A	330	N	H	H	0	0	29	68.48	0	0	1	0	0	-	-	0	0.36	0.0	0.145
1BLF	A	331	L	H	H	0	0	22	68.65	0	0	1	0	0	-	-	0	0.362	0.0	0.11
1BLF	A	332	R	H	H	0	0	130	87.93	0	0	1	0	0	-	-	0	0.606	0.0	0.65
1BLF	A	333	E	S	O	0	0	46	80.85	2	0	0	1	0	-	-	0	0.517	0.1	0.23
1BLF	A	334	T	U	O	0	0	42	68.92	2	0	0	1	0	-	-	0	0.365	0.1	0.21
1BLF	A	335	A	H	H	0	0	50	67.43	0	0	1	0	0	-	-	0	0.347	0.0	0.25
1BLF	A	336	E	H	H	0	0	116	81.51	0	0	1	0	0	-	-	0	0.525	0.0	0.58
1BLF	A	337	E	H	H	0	0	91	76.88	0	0	1	0	0	-	-	0	0.466	0.0	0.455
1BLF	A	338	V	H	H	0	0	22	67.4	0	0	1	0	0	-	-	0	0.346	0.0	0.11
1BLF	A	339	K	H	H	0	0	129	81.44	0	0	1	0	0	-	-	0	0.524	0.0	0.645
1BLF	A	340	A	H	H	0	0	39	67.91	0	0	1	0	0	-	-	0	0.353	0.0	0.195
1BLF	A	341	R	H	H	0	0	37	74.07	0	0	1	0	0	-	-	0	0.431	0.0	0.185
1BLF	A	342	Y	H	H	0	0	114	85.26	0	0	1	0	0	-	-	0	0.572	0.0	0.57
1BLF	A	343	T	H	H	0	0	86	68.72	0	0	1	0	0	-	-	0	0.363	0.0	0.43
1BLF	A	344	R	S	O	0	0	78	74.35	1	0	0	1	0	-	-	0	0.434	0.05	0.39
1BLF	A	345	V	E	B	1	0	1	60.43	0	1	0	0	0	-	-	0	0.258	0.0	0.005
1BLF	A	346	V	E	B	1	0	6	50.44	0	1	0	0	0	-	-	0	0.131	0.0	0.03
1BLF	A	347	W	E	B	1	1	2	46.77	0	1	0	0	0	-	-	0	0.085	0.0	0.01
1BLF	A	348	C	E	B	1	0	0	47.53	0	1	0	0	0	-	-	0	0.094	0.0	0.0
1BLF	A	349	A	E	B	1	0	0	42.8	0	1	0	0	0	-	-	0	0.034	0.0	0.0
1BLF	A	350	V	E	B	1	0	9	43.73	0	1	0	0	0	-	-	0	0.046	0.0	0.045
1BLF	A	351	G	S	O	0	0	4	47.38	1	0	0	1	0	-	-	0	0.092	0.05	0.02
1BLF	A	352	P	H	H	0	0	56	49.63	0	0	1	0	0	-	-	0	0.121	0.0	0.28
1BLF	A	353	E	H	H	0	0	64	56.94	0	0	1	0	0	-	-	0	0.214	0.0	0.32
1BLF	A	354	E	H	H	0	0	31	56.23	0	0	1	0	0	-	-	0	0.205	0.0	0.155
1BLF	A	355	Q	H	H	0	0	59	70.53	0	0	1	0	0	-	-	0	0.386	0.0	0.295
1BLF	A	356	K	H	H	0	0	142	76.51	0	0	1	0	0	-	-	0	0.462	0.0	0.71
1BLF	A	357	K	H	H	0	0	10	55.51	0	0	1	0	0	-	-	0	0.196	0.0	0.05
1BLF	A	358	C	H	H	0	0	0	55.89	0	0	1	0	0	-	-	0	0.2	0.0	0.0
1BLF	A	359	Q	H	H	0	0	104	74.9	0	0	1	0	0	-	-	0	0.441	0.0	0.52
1BLF	A	360	Q	H	H	0	0	106	71.92	0	0	1	0	0	-	-	0	0.403	0.0	0.53
1BLF	A	361	W	H	H	0	0	0	48.67	0	0	1	0	0	-	-	0	0.109	0.0	0.0
1BLF	A	362	S	H	H	0	0	17	62.72	0	0	1	0	0	-	-	0	0.287	0.0	0.085
1BLF	A	363	Q	H	H	0	0	137	82.64	0	0	1	0	0	-	-	0	0.539	0.0	0.685
1BLF	A	364	Q	H	H	0	0	67	76.35	0	0	1	0	0	-	-	0	0.46	0.0	0.335
1BLF	A	365	S	T	O	0	0	11	68.82	4	0	0	1	0	-	-	0	0.364	0.2	0.055
1BLF	A	366	G	T	O	0	0	54	76.6	4	0	0	1	0	-	-	0	0.463	0.2	0.27
1BLF	A	367	Q	S	O	0	0	127	86.4	4	0	0	1	0	-	-	0	0.587	0.2	0.635
1BLF	A	368	N	S	O	0	0	82	73.84	4	0	0	1	0	-	-	0	0.428	0.2	0.41
1BLF	A	369	V	E	B	1	0	1	54.36	0	1	0	0	0	-	-	0	0.181	0.0	0.005
1BLF	A	370	T	E	B	1	0	38	49.74	0	1	0	0	0	-	-	0	0.122	0.0	0.19
1BLF	A	371	C	E	B	1	0	31	52.25	0	1	0	0	0	-	-	0	0.154	0.0	0.155
1BLF	A	372	A	E	B	1	0	18	44.64	0	1	0	0	0	-	-	0	0.058	0.0	0.09
1BLF	A	373	T	E	B	1	0	51	54.19	0	1	0	0	0	-	-	0	0.179	0.0	0.255
1BLF	A	374	A	E	B	1	0	13	53.05	0	1	0	0	0	-	-	0	0.164	0.0	0.065
1BLF	A	375	S	S	O	0	0	59	57.22	2	0	0	1	0	-	-	0	0.217	0.1	0.295
1BLF	A	376	T	S	O	0	0	29	51.7	2	0	0	1	0	-	-	0	0.147	0.1	0.145
1BLF	A	377	T	H	H	0	0	9	49.12	0	0	1	0	0	-	-	0	0.115	0.0	0.045
1BLF	A	378	D	H	H	0	0	42	54.74	0	0	1	0	0	-	-	0	0.186	0.0	0.21
1BLF	A	379	D	H	H	0	0	56	59.19	0	0	1	0	0	-	-	0	0.242	0.0	0.28
1BLF	A	380	C	H	H	0	0	0	48.8	0	0	1	0	0	-	-	0	0.11	0.0	0.0
1BLF	A	381	I	H	H	0	0	0	46.58	0	0	1	0	0	-	-	0	0.082	0.0	0.0
1BLF	A	382	V	H	H	0	0	11	45.94	0	0	1	0	0	-	-	0	0.074	0.0	0.055
1BLF	A	383	L	H	H	0	0	32	48.26	0	0	1	0	0	-	-	0	0.104	0.0	0.16
1BLF	A	384	V	H	H	0	0	0	47.59	0	0	1	0	0	-	-	0	0.095	0.0	0.0
1BLF	A	385	L	H	H	0	0	25	50.45	0	0	1	0	0	-	-	0	0.131	0.0	0.125
1BLF	A	386	K	H	H	0	0	38	57.21	0	0	1	0	0	-	-	0	0.217	0.0	0.19
1BLF	A	387	G	T	O	0	0	15	62.13	4	0	0	1	0	-	-	0	0.279	0.2	0.075
1BLF	A	388	E	S	O	0	0	115	74.65	4	0	0	1	0	-	-	0	0.438	0.2	0.575
1BLF	A	389	A	U	O	0	0	0	55.51	4	0	0	1	0	-	-	0	0.196	0.2	0.0
1BLF	A	390	D	U	O	0	0	1	57.53	4	0	0	1	0	-	-	0	0.221	0.2	0.005
1BLF	A	391	A	E	B	1	1	0	54.22	0	1	0	0	0	-	-	0	0.179	0.0	0.0
1BLF	A	392	L	E	B	0	1	5	49.83	0	1	0	0	0	-	-	0	0.124	0.0	0.025
1BLF	A	393	N	E	B	0	1	20	47.06	0	1	0	0	0	-	-	0	0.088	0.0	0.1
1BLF	A	394	L	E	B	0	1	4	44.29	0	1	0	0	0	-	-	0	0.053	0.0	0.02
1BLF	A	395	D	U	O	0	0	4	40.08	1	0	0	1	0	-	-	0	0.0	0.05	0.02
1BLF	A	396	G	H	H	0	0	0	43.55	0	0	1	0	0	-	-	0	0.044	0.0	0.0
1BLF	A	397	G	H	H	0	0	0	43.04	0	0	1	0	0	-	-	0	0.038	0.0	0.0
1BLF	A	398	Y	H	H	0	0	14	49.65	0	0	1	0	0	-	-	0	0.121	0.0	0.07
1BLF	A	399	I	H	H	0	0	2	48.54	0	0	1	0	0	-	-	0	0.107	0.0	0.01
1BLF	A	400	Y	H	H	0	0	18	52.05	0	0	1	0	0	-	-	0	0.152	0.0	0.09
1BLF	A	401	T	H	H	0	0	3	47.57	0	0	1	0	0	-	-	0	0.095	0.0	0.015
1BLF	A	402	A	H	H	0	0	1	52.6	0	0	1	0	0	-	-	0	0.159	0.0	0.005
1BLF	A	403	G	H	H	0	0	10	55.51	0	0	1	0	0	-	-	0	0.196	0.0	0.05
1BLF	A	404	K	T	O	0	0	86	59.98	4	0	0	1	0	-	-	0	0.252	0.2	0.43
1BLF	A	405	C	T	O	0	0	15	57.69	4	0	0	1	0	-	-	0	0.223	0.2	0.075
1BLF	A	406	G	T	O	0	0	43	54.06	4	0	0	1	0	-	-	0	0.177	0.2	0.215
1BLF	A	407	L	U	O	0	0	6	52.95	4	0	0	1	0	-	-	0	0.163	0.2	0.03
1BLF	A	408	V	E	B	1	0	32	45.57	0	1	0	0	0	-	-	0	0.07	0.0	0.16
1BLF	A	409	P	E	B	1	0	9	49.39	0	1	0	0	0	-	-	0	0.118	0.0	0.045
1BLF	A	410	V	E	B	0	0	12	48.66	0	1	0	0	0	-	-	0	0.109	0.0	0.06
1BLF	A	411	L	E	B	1	1	0	49.75	0	1	0	0	0	-	-	0	0.123	0.0	0.0
1BLF	A	412	A	E	B	1	1	0	50.43	0	1	0	0	0	-	-	0	0.131	0.0	0.0
1BLF	A	413	E	E	B	0	1	8	58.21	0	1	0	0	0	-	-	0	0.23	0.0	0.04
1BLF	A	414	N	E	B	0	1	1	69.0	0	1	0	0	0	-	-	0	0.366	0.0	0.005
1BLF	A	415	R	U	O	0	0	57	98.64	18	0	0	1	0	2270	S60.001	1	0.742	0.9	0.285
1BLF	A	416	K	U	O	0	0	139	106.9	18	0	0	1	0	-	-	0	0.847	0.9	0.695
1BLF	A	417	S	U	O	0	0	29	107.76	18	0	0	1	0	-	-	0	0.858	0.9	0.145
1BLF	A	418	S	S	O	0	0	108	108.4	18	0	0	1	0	-	-	0	0.866	0.9	0.54
1BLF	A	419	K	S	O	0	0	143	112.13	18	0	0	1	0	-	-	0	0.913	0.9	0.715
1BLF	A	420	H	U	O	0	0	82	117.22	18	0	0	1	0	-	-	0	0.977	0.9	0.41
1BLF	A	421	S	S	O	0	0	118	118.97	18	0	0	1	0	-	-	0	1.0	0.9	0.59
1BLF	A	422	S	S	O	0	0	96	119.0	18	0	0	1	0	-	-	0	1.0	0.9	0.48
1BLF	A	423	L	S	O	0	0	63	107.35	18	0	0	1	0	-	-	0	0.852	0.9	0.315
1BLF	A	424	D	U	O	0	0	90	94.99	18	0	0	1	0	-	-	0	0.696	0.9	0.45
1BLF	A	425	C	T	O	0	0	6	71.54	18	0	0	1	0	-	-	0	0.399	0.9	0.03
1BLF	A	426	V	T	O	0	0	23	74.88	18	0	0	1	0	-	-	0	0.441	0.9	0.115
1BLF	A	427	L	T	O	0	0	110	86.11	18	0	0	1	0	-	-	0	0.583	0.9	0.55
1BLF	A	428	R	S	O	0	0	16	97.83	18	0	0	1	0	-	-	0	0.732	0.9	0.08
1BLF	A	429	P	U	O	0	0	85	86.37	18	0	0	1	0	-	-	0	0.587	0.9	0.425
1BLF	A	430	T	U	O	0	0	53	77.18	18	0	0	1	0	-	-	0	0.47	0.9	0.265
1BLF	A	431	E	U	O	0	0	77	84.0	18	0	0	1	0	-	-	0	0.557	0.9	0.385
1BLF	A	432	G	U	O	0	0	8	65.61	18	0	0	1	0	-	-	0	0.323	0.9	0.04
1BLF	A	433	Y	E	B	1	0	6	50.77	0	1	0	0	0	-	-	0	0.135	0.0	0.03
1BLF	A	434	L	E	B	1	0	25	53.74	0	1	0	0	0	-	-	0	0.173	0.0	0.125
1BLF	A	435	A	E	B	1	1	2	48.89	0	1	0	0	0	-	-	0	0.112	0.0	0.01
1BLF	A	436	V	E	B	0	1	3	42.69	0	1	0	0	0	-	-	0	0.033	0.0	0.015
1BLF	A	437	A	E	B	0	1	1	48.19	0	1	0	0	0	-	-	0	0.103	0.0	0.005
1BLF	A	438	V	E	B	1	1	0	51.6	0	1	0	0	0	-	-	0	0.146	0.0	0.0
1BLF	A	439	V	E	B	1	0	0	53.98	0	1	0	0	0	-	-	0	0.176	0.0	0.0
1BLF	A	440	K	E	B	1	0	34	57.56	0	1	0	0	0	2270	S60.001	1	0.221	0.0	0.17
1BLF	A	441	K	T	O	0	0	67	70.36	8	0	0	1	0	-	-	0	0.384	0.4	0.335
1BLF	A	442	A	T	O	0	0	81	65.71	8	0	0	1	0	-	-	0	0.325	0.4	0.405
1BLF	A	443	N	S	O	0	0	80	79.58	8	0	0	1	0	-	-	0	0.501	0.4	0.4
1BLF	A	444	E	T	O	0	0	120	76.43	8	0	0	1	0	-	-	0	0.461	0.4	0.6
1BLF	A	445	G	T	O	0	0	59	80.22	8	0	0	1	0	-	-	0	0.509	0.4	0.295
1BLF	A	446	L	U	O	0	0	14	78.83	8	0	0	1	0	-	-	0	0.491	0.4	0.07
1BLF	A	447	T	U	O	0	0	28	73.56	8	0	0	1	0	-	-	0	0.424	0.4	0.14
1BLF	A	448	W	S	O	0	0	13	66.22	8	0	0	1	0	-	-	0	0.331	0.4	0.065
1BLF	A	449	N	G	H	0	0	123	71.27	0	0	1	0	0	-	-	0	0.395	0.0	0.615
1BLF	A	450	S	G	H	0	0	40	65.2	0	0	1	0	0	-	-	0	0.318	0.0	0.2
1BLF	A	451	L	G	H	0	0	1	63.33	0	0	1	0	0	-	-	0	0.295	0.0	0.005
1BLF	A	452	K	T	O	0	0	122	72.76	3	0	0	1	0	-	-	0	0.414	0.15	0.61
1BLF	A	453	D	T	O	0	0	99	79.19	3	0	0	1	0	-	-	0	0.496	0.15	0.495
1BLF	A	454	K	S	O	0	0	55	64.67	3	0	0	1	0	-	-	0	0.312	0.15	0.275
1BLF	A	455	K	E	B	1	0	58	62.24	0	1	0	0	0	-	-	0	0.281	0.0	0.29
1BLF	A	456	S	E	B	1	1	0	50.79	0	1	0	0	0	-	-	0	0.136	0.0	0.0
1BLF	A	457	C	E	B	1	1	1	50.04	0	1	0	0	0	-	-	0	0.126	0.0	0.005
1BLF	A	458	H	E	B	0	1	0	43.64	0	1	0	0	0	-	-	0	0.045	0.0	0.0
1BLF	A	459	T	S	O	0	0	1	46.39	5	0	0	1	0	-	-	0	0.08	0.25	0.005
1BLF	A	460	A	U	O	0	0	0	51.88	5	0	0	1	0	-	-	0	0.15	0.25	0.0
1BLF	A	461	V	T	O	0	0	26	50.93	5	0	0	1	0	-	-	0	0.137	0.25	0.13
1BLF	A	462	D	T	O	0	0	34	50.5	5	0	0	1	0	-	-	0	0.132	0.25	0.17
1BLF	A	463	R	U	O	0	0	21	52.42	5	0	0	1	0	-	-	0	0.156	0.25	0.105
1BLF	A	464	T	I	H	0	0	1	47.07	0	0	1	0	0	-	-	0	0.089	0.0	0.005
1BLF	A	465	A	I	H	0	0	3	49.37	0	0	1	0	0	-	-	0	0.118	0.0	0.015
1BLF	A	466	G	I	H	0	0	0	44.09	0	0	1	0	0	-	-	0	0.051	0.0	0.0
1BLF	A	467	W	I	H	0	0	10	49.37	0	0	1	0	0	-	-	0	0.118	0.0	0.05
1BLF	A	468	N	I	H	0	0	8	50.82	0	0	1	0	0	-	-	0	0.136	0.0	0.04
1BLF	A	469	I	H	H	0	0	19	49.73	0	0	1	0	0	-	-	0	0.122	0.0	0.095
1BLF	A	470	P	H	H	0	0	0	51.55	0	0	1	0	0	-	-	0	0.145	0.0	0.0
1BLF	A	471	M	H	H	0	0	0	55.64	0	0	1	0	0	-	-	0	0.197	0.0	0.0
1BLF	A	472	G	H	H	0	0	12	51.37	0	0	1	0	0	-	-	0	0.143	0.0	0.06
1BLF	A	473	L	H	H	0	0	44	53.17	0	0	1	0	0	-	-	0	0.166	0.0	0.22
1BLF	A	474	I	H	H	0	0	6	52.46	0	0	1	0	0	-	-	0	0.157	0.0	0.03
1BLF	A	475	V	H	H	0	0	13	54.39	0	0	1	0	0	-	-	0	0.181	0.0	0.065
1BLF	A	476	N	H	H	0	0	120	64.41	0	0	1	0	0	-	-	0	0.308	0.0	0.6
1BLF	A	477	Q	H	H	0	0	120	77.64	0	0	1	0	0	-	-	0	0.476	0.0	0.6
1BLF	A	478	T	H	H	0	0	64	71.4	0	0	1	0	0	-	-	0	0.397	0.0	0.32
1BLF	A	479	G	T	O	0	0	68	69.67	4	0	0	1	0	-	-	0	0.375	0.2	0.34
1BLF	A	480	S	U	O	0	0	55	67.62	4	0	0	1	0	-	-	0	0.349	0.2	0.275
1BLF	A	481	C	S	O	0	0	61	68.28	4	0	0	1	0	-	-	0	0.357	0.2	0.305
1BLF	A	482	A	U	O	0	0	34	73.87	4	0	0	1	0	-	-	0	0.428	0.2	0.17
1BLF	A	483	F	G	H	0	0	31	77.11	0	0	1	0	0	-	-	0	0.469	0.0	0.155
1BLF	A	484	D	G	H	0	0	57	77.08	0	0	1	0	0	-	-	0	0.469	0.0	0.285
1BLF	A	485	E	G	H	0	0	112	74.61	0	0	1	0	0	-	-	0	0.438	0.0	0.56
1BLF	A	486	F	T	O	0	0	26	67.0	3	0	0	1	0	-	-	0	0.341	0.15	0.13
1BLF	A	487	F	S	O	0	0	2	71.83	3	0	0	1	0	-	-	0	0.402	0.15	0.01
1BLF	A	488	S	S	O	0	0	40	68.15	3	0	0	1	0	-	-	0	0.356	0.15	0.2
1BLF	A	489	Q	E	B	1	0	83	65.44	0	1	0	0	0	-	-	0	0.321	0.0	0.415
1BLF	A	490	S	E	B	1	0	1	48.32	0	1	0	0	0	-	-	0	0.104	0.0	0.005
1BLF	A	491	C	E	B	1	0	1	45.21	0	1	0	0	0	-	-	0	0.065	0.0	0.005
1BLF	A	492	A	U	O	0	0	0	43.2	20	0	0	1	0	-	-	0	0.04	1.0	0.0
1BLF	A	493	P	T	O	0	0	0	43.17	20	0	0	1	0	-	-	0	0.039	1.0	0.0
1BLF	A	494	G	T	O	0	0	43	56.98	20	0	0	1	0	-	-	0	0.214	1.0	0.215
1BLF	A	495	A	S	O	0	0	25	63.48	20	0	0	1	0	-	-	0	0.297	1.0	0.125
1BLF	A	496	D	U	O	0	0	96	79.62	20	0	0	1	0	-	-	0	0.501	1.0	0.48
1BLF	A	497	P	T	O	0	0	69	70.98	20	0	0	1	0	-	-	0	0.392	1.0	0.345
1BLF	A	498	K	T	O	0	0	191	88.24	20	0	0	1	0	-	-	0	0.61	1.0	0.955
1BLF	A	499	S	S	O	0	0	33	73.38	20	0	0	1	0	-	-	0	0.422	1.0	0.165
1BLF	A	500	R	T	O	0	0	114	82.26	20	0	0	1	0	-	-	0	0.534	1.0	0.57
1BLF	A	501	L	T	O	0	0	9	58.75	20	0	0	1	0	-	-	0	0.237	1.0	0.045
1BLF	A	502	C	S	O	0	0	7	54.39	20	0	0	1	0	-	-	0	0.181	1.0	0.035
1BLF	A	503	A	T	O	0	0	49	53.29	20	0	0	1	0	-	-	0	0.167	1.0	0.245
1BLF	A	504	L	T	O	0	0	16	49.89	20	0	0	1	0	-	-	0	0.124	1.0	0.08
1BLF	A	505	C	U	O	0	0	10	50.51	20	0	0	1	0	-	-	0	0.132	1.0	0.05
1BLF	A	506	A	U	O	0	0	23	59.54	20	0	0	1	0	-	-	0	0.247	1.0	0.115
1BLF	A	507	G	U	O	0	0	0	64.52	20	0	0	1	0	-	-	0	0.31	1.0	0.0
1BLF	A	508	D	S	O	0	0	30	75.41	20	0	0	1	0	-	-	0	0.448	1.0	0.15
1BLF	A	509	D	S	O	0	0	164	96.73	20	0	0	1	0	-	-	0	0.718	1.0	0.82
1BLF	A	510	Q	S	O	0	0	151	99.5	20	0	0	1	0	-	-	0	0.753	1.0	0.755
1BLF	A	511	G	U	O	0	0	16	76.52	20	0	0	1	0	-	-	0	0.462	1.0	0.08
1BLF	A	512	L	U	O	0	0	84	75.08	20	0	0	1	0	-	-	0	0.443	1.0	0.42
1BLF	A	513	D	S	O	0	0	85	76.85	20	0	0	1	0	-	-	0	0.466	1.0	0.425
1BLF	A	514	K	T	O	0	0	123	72.78	20	0	0	1	0	-	-	0	0.414	1.0	0.615
1BLF	A	515	C	T	O	0	0	5	56.67	20	0	0	1	0	-	-	0	0.21	1.0	0.025
1BLF	A	516	V	U	O	0	0	22	53.51	20	0	0	1	0	-	-	0	0.17	1.0	0.11
1BLF	A	517	P	S	O	0	0	17	49.96	20	0	0	1	0	-	-	0	0.125	1.0	0.085
1BLF	A	518	N	S	O	0	0	3	50.47	20	0	0	1	0	-	-	0	0.132	1.0	0.015
1BLF	A	519	S	T	O	0	0	29	59.03	20	0	0	1	0	-	-	0	0.24	1.0	0.145
1BLF	A	520	K	T	O	0	0	49	70.4	20	0	0	1	0	-	-	0	0.384	1.0	0.245
1BLF	A	521	E	S	O	0	0	3	57.62	20	0	0	1	0	-	-	0	0.222	1.0	0.015
1BLF	A	522	K	T	O	0	0	62	68.79	20	0	0	1	0	-	-	0	0.364	1.0	0.31
1BLF	A	523	Y	T	O	0	0	13	57.56	20	0	0	1	0	-	-	0	0.221	1.0	0.065
1BLF	A	524	Y	U	O	0	0	36	45.27	20	0	0	1	0	-	-	0	0.066	1.0	0.18
1BLF	A	525	G	H	H	0	0	6	44.9	0	0	1	0	0	-	-	0	0.061	0.0	0.03
1BLF	A	526	Y	H	H	0	0	4	44.63	0	0	1	0	0	-	-	0	0.058	0.0	0.02
1BLF	A	527	T	H	H	0	0	30	47.76	0	0	1	0	0	-	-	0	0.097	0.0	0.15
1BLF	A	528	G	H	H	0	0	2	41.6	0	0	1	0	0	-	-	0	0.019	0.0	0.01
1BLF	A	529	A	H	H	0	0	0	49.82	0	0	1	0	0	-	-	0	0.123	0.0	0.0
1BLF	A	530	F	H	H	0	0	0	55.77	0	0	1	0	0	-	-	0	0.199	0.0	0.0
1BLF	A	531	R	H	H	0	0	58	64.44	0	0	1	0	0	-	-	0	0.309	0.0	0.29
1BLF	A	532	C	H	H	0	0	0	51.14	0	0	1	0	0	-	-	0	0.14	0.0	0.0
1BLF	A	533	L	H	H	0	0	2	51.44	0	0	1	0	0	-	-	0	0.144	0.0	0.01
1BLF	A	534	A	H	H	0	0	11	54.73	0	0	1	0	0	-	-	0	0.186	0.0	0.055
1BLF	A	535	E	T	O	0	0	62	54.73	5	0	0	1	0	-	-	0	0.186	0.25	0.31
1BLF	A	536	D	T	O	0	0	90	59.3	5	0	0	1	0	-	-	0	0.244	0.25	0.45
1BLF	A	537	V	S	O	0	0	32	57.33	5	0	0	1	0	-	-	0	0.219	0.25	0.16
1BLF	A	538	G	S	O	0	0	3	59.8	5	0	0	1	0	-	-	0	0.25	0.25	0.015
1BLF	A	539	D	S	O	0	0	50	61.46	5	0	0	1	0	-	-	0	0.271	0.25	0.25
1BLF	A	540	V	E	B	0	1	0	59.73	0	1	0	0	0	-	-	0	0.249	0.0	0.0
1BLF	A	541	A	E	B	1	1	0	55.28	0	1	0	0	0	-	-	0	0.193	0.0	0.0
1BLF	A	542	F	E	B	1	1	1	47.76	0	1	0	0	0	-	-	0	0.097	0.0	0.005
1BLF	A	543	V	E	B	1	0	0	42.95	0	1	0	0	0	-	-	0	0.036	0.0	0.0
1BLF	A	544	K	E	B	1	0	8	43.25	0	1	0	0	0	-	-	0	0.04	0.0	0.04
1BLF	A	545	N	H	H	0	0	36	48.77	0	0	1	0	0	-	-	0	0.11	0.0	0.18
1BLF	A	546	D	H	H	0	0	19	50.85	0	0	1	0	0	-	-	0	0.136	0.0	0.095
1BLF	A	547	T	H	H	0	0	3	56.0	0	0	1	0	0	-	-	0	0.202	0.0	0.015
1BLF	A	548	V	H	H	0	0	2	56.51	0	0	1	0	0	-	-	0	0.208	0.0	0.01
1BLF	A	549	W	H	H	0	0	88	60.9	0	0	1	0	0	-	-	0	0.264	0.0	0.44
1BLF	A	550	E	H	H	0	0	61	66.7	0	0	1	0	0	-	-	0	0.337	0.0	0.305
1BLF	A	551	N	T	O	0	0	2	61.32	15	0	0	1	0	-	-	0	0.269	0.75	0.01
1BLF	A	552	T	S	O	0	0	0	56.48	15	0	0	1	0	-	-	0	0.208	0.75	0.0
1BLF	A	553	N	T	O	0	0	72	70.42	15	0	0	1	0	-	-	0	0.384	0.75	0.36
1BLF	A	554	G	T	O	0	0	62	76.44	15	0	0	1	0	-	-	0	0.461	0.75	0.31
1BLF	A	555	E	S	O	0	0	127	74.52	15	0	0	1	0	-	-	0	0.436	0.75	0.635
1BLF	A	556	S	U	O	0	0	1	76.03	15	0	0	1	0	-	-	0	0.456	0.75	0.005
1BLF	A	557	T	U	O	0	0	115	81.89	15	0	0	1	0	-	-	0	0.53	0.75	0.575
1BLF	A	558	A	S	O	0	0	20	77.01	15	0	0	1	0	-	-	0	0.468	0.75	0.1
1BLF	A	559	D	T	O	0	0	140	83.99	15	0	0	1	0	-	-	0	0.556	0.75	0.7
1BLF	A	560	W	T	O	0	0	43	67.27	15	0	0	1	0	-	-	0	0.345	0.75	0.215
1BLF	A	561	A	T	O	0	0	0	68.16	15	0	0	1	0	-	-	0	0.356	0.75	0.0
1BLF	A	562	K	T	O	0	0	107	88.42	15	0	0	1	0	-	-	0	0.613	0.75	0.535
1BLF	A	563	N	T	O	0	0	132	85.77	15	0	0	1	0	-	-	0	0.579	0.75	0.66
1BLF	A	564	L	U	O	0	0	22	76.68	15	0	0	1	0	-	-	0	0.464	0.75	0.11
1BLF	A	565	N	U	O	0	0	97	87.05	15	0	0	1	0	-	-	0	0.595	0.75	0.485
1BLF	A	566	R	G	H	0	0	42	74.28	0	0	1	0	0	-	-	0	0.433	0.0	0.21
1BLF	A	567	E	G	H	0	0	122	80.34	0	0	1	0	0	-	-	0	0.51	0.0	0.61
1BLF	A	568	D	G	H	0	0	80	71.68	0	0	1	0	0	-	-	0	0.4	0.0	0.4
1BLF	A	569	F	E	B	1	0	0	61.27	0	1	0	0	0	-	-	0	0.268	0.0	0.0
1BLF	A	570	R	E	B	1	1	25	69.92	0	1	0	0	0	-	-	0	0.378	0.0	0.125
1BLF	A	571	L	E	B	1	1	3	44.93	0	1	0	0	0	-	-	0	0.061	0.0	0.015
1BLF	A	572	L	E	B	0	1	1	53.64	0	1	0	0	0	-	-	0	0.172	0.0	0.005
1BLF	A	573	C	U	O	0	0	3	56.32	5	0	0	1	0	-	-	0	0.206	0.25	0.015
1BLF	A	574	L	T	O	0	0	76	60.66	5	0	0	1	0	-	-	0	0.261	0.25	0.38
1BLF	A	575	D	T	O	0	0	116	70.57	5	0	0	1	0	-	-	0	0.386	0.25	0.58
1BLF	A	576	G	S	O	0	0	18	62.27	5	0	0	1	0	-	-	0	0.281	0.25	0.09
1BLF	A	577	T	U	O	0	0	54	54.28	5	0	0	1	0	-	-	0	0.18	0.25	0.27
1BLF	A	578	R	E	B	1	0	55	66.74	0	1	0	0	0	-	-	0	0.338	0.0	0.275
1BLF	A	579	K	E	B	1	0	54	66.03	0	1	0	0	0	-	-	0	0.329	0.0	0.27
1BLF	A	580	P	E	B	1	0	39	60.81	0	1	0	0	0	-	-	0	0.263	0.0	0.195
1BLF	A	581	V	T	O	0	0	6	63.8	9	0	0	1	0	-	-	0	0.301	0.45	0.03
1BLF	A	582	T	T	O	0	0	94	71.19	9	0	0	1	0	-	-	0	0.394	0.45	0.47
1BLF	A	583	E	U	O	0	0	76	85.53	9	0	0	1	0	-	-	0	0.576	0.45	0.38
1BLF	A	584	A	U	O	0	0	6	71.01	9	0	0	1	0	-	-	0	0.392	0.45	0.03
1BLF	A	585	Q	S	O	0	0	149	80.63	9	0	0	1	0	-	-	0	0.514	0.45	0.745
1BLF	A	586	S	S	O	0	0	71	66.56	9	0	0	1	0	-	-	0	0.336	0.45	0.355
1BLF	A	587	C	S	O	0	0	3	57.1	9	0	0	1	0	-	-	0	0.216	0.45	0.015
1BLF	A	588	H	U	O	0	0	47	56.81	9	0	0	1	0	-	-	0	0.212	0.45	0.235
1BLF	A	589	L	S	O	0	0	17	52.54	9	0	0	1	0	-	-	0	0.158	0.45	0.085
1BLF	A	590	A	E	B	1	0	28	50.62	0	1	0	0	0	-	-	0	0.134	0.0	0.14
1BLF	A	591	V	E	B	1	0	80	52.09	0	1	0	0	0	-	-	0	0.152	0.0	0.4
1BLF	A	592	A	E	B	1	0	2	49.22	0	1	0	0	0	-	-	0	0.116	0.0	0.01
1BLF	A	593	P	U	O	0	0	23	46.68	3	0	0	1	0	-	-	0	0.084	0.15	0.115
1BLF	A	594	N	U	O	0	0	6	52.06	3	0	0	1	0	-	-	0	0.152	0.15	0.03
1BLF	A	595	H	U	O	0	0	11	44.98	3	0	0	1	0	-	-	0	0.062	0.15	0.055
1BLF	A	596	A	E	B	1	1	0	49.83	0	1	0	0	0	-	-	0	0.124	0.0	0.0
1BLF	A	597	V	E	B	1	1	0	48.67	0	1	0	0	0	-	-	0	0.109	0.0	0.0
1BLF	A	598	V	E	B	1	1	2	50.28	0	1	0	0	0	-	-	0	0.129	0.0	0.01
1BLF	A	599	S	E	B	1	1	0	61.87	0	1	0	0	0	-	-	0	0.276	0.0	0.0
1BLF	A	600	R	U	O	0	0	29	83.45	4	0	0	1	0	-	-	0	0.55	0.2	0.145
1BLF	A	601	S	T	O	0	0	85	70.39	4	0	0	1	0	-	-	0	0.384	0.2	0.425
1BLF	A	602	D	T	O	0	0	115	70.58	4	0	0	1	0	-	-	0	0.386	0.2	0.575
1BLF	A	603	R	T	O	0	0	16	61.95	4	0	0	1	0	-	-	0	0.277	0.2	0.08
1BLF	A	604	A	H	H	0	0	16	56.0	0	0	1	0	0	-	-	0	0.202	0.0	0.08
1BLF	A	605	A	H	H	0	0	78	60.61	0	0	1	0	0	-	-	0	0.26	0.0	0.39
1BLF	A	606	H	H	H	0	0	40	63.88	0	0	1	0	0	-	-	0	0.302	0.0	0.2
1BLF	A	607	V	H	H	0	0	0	62.71	0	0	1	0	0	-	-	0	0.287	0.0	0.0
1BLF	A	608	K	H	H	0	0	63	74.27	0	0	1	0	0	-	-	0	0.433	0.0	0.315
1BLF	A	609	Q	H	H	0	0	117	75.88	0	0	1	0	0	-	-	0	0.454	0.0	0.585
1BLF	A	610	V	H	H	0	0	17	58.05	0	0	1	0	0	-	-	0	0.228	0.0	0.085
1BLF	A	611	L	H	H	0	0	2	59.21	0	0	1	0	0	-	-	0	0.242	0.0	0.01
1BLF	A	612	L	H	H	0	0	42	66.84	0	0	1	0	0	-	-	0	0.339	0.0	0.21
1BLF	A	613	H	H	H	0	0	103	79.8	0	0	1	0	0	-	-	0	0.503	0.0	0.515
1BLF	A	614	Q	H	H	0	0	1	67.42	0	0	1	0	0	-	-	0	0.346	0.0	0.005
1BLF	A	615	Q	H	H	0	0	19	65.88	0	0	1	0	0	-	-	0	0.327	0.0	0.095
1BLF	A	616	A	H	H	0	0	60	66.24	0	0	1	0	0	-	-	0	0.331	0.0	0.3
1BLF	A	617	L	H	H	0	0	37	70.9	0	0	1	0	0	-	-	0	0.391	0.0	0.185
1BLF	A	618	F	H	H	0	0	1	68.97	0	0	1	0	0	-	-	0	0.366	0.0	0.005
1BLF	A	619	G	S	O	0	0	2	74.28	20	0	0	1	0	-	-	0	0.433	1.0	0.01
1BLF	A	620	K	T	O	0	0	106	99.19	20	0	0	1	0	-	-	0	0.749	1.0	0.53
1BLF	A	621	N	T	O	0	0	164	108.07	20	0	0	1	0	-	-	0	0.862	1.0	0.82
1BLF	A	622	G	U	O	0	0	8	96.65	20	0	0	1	0	-	-	0	0.717	1.0	0.04
1BLF	A	623	K	S	O	0	0	153	101.99	20	0	0	1	0	-	-	0	0.784	1.0	0.765
1BLF	A	624	N	S	O	0	0	19	89.77	20	0	0	1	0	-	-	0	0.63	1.0	0.095
1BLF	A	625	C	T	O	0	0	19	82.3	20	0	0	1	0	-	-	0	0.535	1.0	0.095
1BLF	A	626	P	T	O	0	0	116	93.66	20	0	0	1	0	-	-	0	0.679	1.0	0.58
1BLF	A	627	D	T	O	0	0	135	105.28	20	0	0	1	0	-	-	0	0.826	1.0	0.675
1BLF	A	628	K	T	O	0	0	114	100.15	20	0	0	1	0	-	-	0	0.761	1.0	0.57
1BLF	A	629	F	U	O	0	0	16	84.11	20	0	0	1	0	-	-	0	0.558	1.0	0.08
1BLF	A	630	C	U	O	0	0	22	71.1	20	0	0	1	0	-	-	0	0.393	1.0	0.11
1BLF	A	631	L	T	O	0	0	0	63.33	20	0	0	1	0	-	-	0	0.295	1.0	0.0
1BLF	A	632	F	T	O	0	0	5	66.1	20	0	0	1	0	-	-	0	0.33	1.0	0.025
1BLF	A	633	K	U	O	0	0	116	86.01	20	0	0	1	0	-	-	0	0.582	1.0	0.58
1BLF	A	634	S	S	O	0	0	15	79.0	20	0	0	1	0	-	-	0	0.493	1.0	0.075
1BLF	A	635	E	S	O	0	0	135	98.28	20	0	0	1	0	-	-	0	0.737	1.0	0.675
1BLF	A	636	T	S	O	0	0	51	80.43	20	0	0	1	0	-	-	0	0.511	1.0	0.255
1BLF	A	637	K	S	O	0	0	77	74.94	20	0	0	1	0	-	-	0	0.442	1.0	0.385
1BLF	A	638	N	U	O	0	0	32	46.25	20	0	0	1	0	-	-	0	0.078	1.0	0.16
1BLF	A	639	L	U	O	0	0	12	45.11	20	0	0	1	0	-	-	0	0.064	1.0	0.06
1BLF	A	640	L	S	O	0	0	6	43.09	20	0	0	1	0	-	-	0	0.038	1.0	0.03
1BLF	A	641	F	S	O	0	0	3	50.43	20	0	0	1	0	-	-	0	0.131	1.0	0.015
1BLF	A	642	N	U	O	0	0	7	48.22	20	0	0	1	0	-	-	0	0.103	1.0	0.035
1BLF	A	643	D	T	O	0	0	21	50.49	20	0	0	1	0	-	-	0	0.132	1.0	0.105
1BLF	A	644	N	T	O	0	0	32	60.5	20	0	0	1	0	-	-	0	0.259	1.0	0.16
1BLF	A	645	T	U	O	0	0	4	57.02	20	0	0	1	0	-	-	0	0.215	1.0	0.02
1BLF	A	646	E	U	O	0	0	45	73.77	20	0	0	1	0	-	-	0	0.427	1.0	0.225
1BLF	A	647	C	E	B	1	0	8	60.97	0	1	0	0	0	-	-	0	0.265	0.0	0.04
1BLF	A	648	L	E	B	1	0	0	56.63	0	1	0	0	0	-	-	0	0.21	0.0	0.0
1BLF	A	649	A	E	B	1	0	1	61.62	0	1	0	0	0	-	-	0	0.273	0.0	0.005
1BLF	A	650	K	E	B	1	0	97	78.06	0	1	0	0	0	-	-	0	0.481	0.0	0.485
1BLF	A	651	L	U	O	0	0	39	83.37	6	0	0	1	0	-	-	0	0.549	0.3	0.195
1BLF	A	652	G	U	O	0	0	59	97.52	6	0	0	1	0	-	-	0	0.728	0.3	0.295
1BLF	A	653	G	S	O	0	0	77	101.6	6	0	0	1	0	-	-	0	0.78	0.3	0.385
1BLF	A	654	R	S	O	0	0	200	108.42	6	0	0	1	0	-	-	0	0.866	0.3	1.0
1BLF	A	655	P	U	O	0	0	31	90.71	6	0	0	1	0	-	-	0	0.642	0.3	0.155
1BLF	A	656	T	U	O	0	0	45	78.84	6	0	0	1	0	-	-	0	0.491	0.3	0.225
1BLF	A	657	Y	H	H	0	0	29	66.66	0	0	1	0	0	-	-	0	0.337	0.0	0.145
1BLF	A	658	E	H	H	0	0	98	75.85	0	0	1	0	0	-	-	0	0.453	0.0	0.49
1BLF	A	659	E	H	H	0	0	114	74.88	0	0	1	0	0	-	-	0	0.441	0.0	0.57
1BLF	A	660	Y	H	H	0	0	35	56.14	0	0	1	0	0	-	-	0	0.203	0.0	0.175
1BLF	A	661	L	H	H	0	0	9	52.29	0	0	1	0	0	-	-	0	0.155	0.0	0.045
1BLF	A	662	G	U	O	0	0	11	65.03	1	0	0	1	0	-	-	0	0.316	0.05	0.055
1BLF	A	663	T	H	H	0	0	104	70.0	0	0	1	0	0	-	-	0	0.379	0.0	0.52
1BLF	A	664	E	H	H	0	0	132	78.28	0	0	1	0	0	-	-	0	0.484	0.0	0.66
1BLF	A	665	Y	H	H	0	0	17	56.49	0	0	1	0	0	-	-	0	0.208	0.0	0.085
1BLF	A	666	V	H	H	0	0	20	56.41	0	0	1	0	0	-	-	0	0.207	0.0	0.1
1BLF	A	667	T	H	H	0	0	72	61.22	0	0	1	0	0	-	-	0	0.268	0.0	0.36
1BLF	A	668	A	H	H	0	0	47	56.76	0	0	1	0	0	-	-	0	0.211	0.0	0.235
1BLF	A	669	I	H	H	0	0	1	52.82	0	0	1	0	0	-	-	0	0.161	0.0	0.005
1BLF	A	670	A	H	H	0	0	35	60.28	0	0	1	0	0	-	-	0	0.256	0.0	0.175
1BLF	A	671	N	H	H	0	0	93	68.53	0	0	1	0	0	-	-	0	0.36	0.0	0.465
1BLF	A	672	L	H	H	0	0	8	55.07	0	0	1	0	0	-	-	0	0.19	0.0	0.04
1BLF	A	673	K	T	O	0	0	34	72.4	6	0	0	1	0	-	-	0	0.41	0.3	0.17
1BLF	A	674	K	T	O	0	0	163	83.17	6	0	0	1	0	-	-	0	0.546	0.3	0.815
1BLF	A	675	C	S	O	0	0	31	72.08	6	0	0	1	0	-	-	0	0.405	0.3	0.155
1BLF	A	676	S	S	O	0	0	72	89.07	6	0	0	1	1	-	-	0	0.621	0.3	0.36
1BLF	A	677	T	U	O	0	0	110	94.67	6	0	0	1	1	-	-	0	0.692	0.3	0.55
1BLF	A	678	S	U	O	0	0	31	77.51	6	0	0	1	1	-	-	0	0.474	0.3	0.155
1BLF	A	679	P	H	H	0	0	59	69.6	0	0	1	0	1	-	-	0	0.374	0.0	0.295
1BLF	A	680	L	H	H	0	0	10	59.21	0	0	1	0	1	-	-	0	0.242	0.0	0.05
1BLF	A	681	L	H	H	0	0	33	69.14	0	0	1	0	1	-	-	0	0.368	0.0	0.165
1BLF	A	682	E	H	H	0	0	90	81.19	0	0	1	0	1	-	-	0	0.521	0.0	0.45
1BLF	A	683	A	H	H	0	0	0	62.77	0	0	1	0	1	-	-	0	0.288	0.0	0.0
1BLF	A	684	C	H	H	0	0	1	60.58	0	0	1	0	1	-	-	0	0.26	0.0	0.005
1BLF	A	685	A	H	H	0	0	62	65.34	0	0	1	0	1	-	-	0	0.32	0.0	0.31
1BLF	A	686	F	H	H	0	0	42	71.72	0	0	1	0	1	-	-	0	0.401	0.0	0.21
1BLF	A	687	L	H	H	0	0	63	78.25	0	0	1	0	1	-	-	0	0.484	0.0	0.315
1BLF	A	688	T	T	O	0	0	98	90.63	2	0	0	1	1	-	-	0	0.641	0.1	0.49
1BLF	A	689	R	U	O	0	0	181	107.46	2	0	0	1	1	-	-	0	0.854	0.1	0.905
1BMO	A	54	P	U	O	0	0	137	53.38	10	0	0	1	1	-	-	0	0.828	0.833	0.685
1BMO	A	55	C	U	O	0	0	28	55.86	10	0	0	1	1	-	-	0	0.871	0.833	0.14
1BMO	A	56	Q	T	O	0	0	183	63.2	10	0	0	1	1	-	-	0	1.0	0.833	0.915
1BMO	A	57	N	T	O	0	0	159	62.16	10	0	0	1	1	-	-	0	0.982	0.833	0.795
1BMO	A	58	H	U	O	0	0	82	51.54	10	0	0	1	1	-	-	0	0.796	0.833	0.41
1BMO	A	59	H	U	O	0	0	179	42.81	10	0	0	1	1	-	-	0	0.643	0.833	0.895
1BMO	A	60	C	U	O	0	0	18	41.62	10	0	0	1	1	-	-	0	0.622	0.833	0.09
1BMO	A	61	K	U	O	0	0	119	37.36	10	0	0	1	1	-	-	0	0.547	0.833	0.595
1BMO	A	62	H	T	O	0	0	107	49.31	10	0	0	1	1	-	-	0	0.757	0.833	0.535
1BMO	A	63	G	T	O	0	0	9	39.26	10	0	0	1	1	-	-	0	0.581	0.833	0.045
1BMO	A	64	K	E	B	1	0	60	34.93	0	1	0	0	1	-	-	0	0.505	0.0	0.3
1BMO	A	65	V	E	B	1	0	44	38.36	0	1	0	0	1	-	-	0	0.565	0.0	0.22
1BMO	A	66	C	E	B	1	0	25	45.0	0	1	0	0	1	-	-	0	0.681	0.0	0.125
1BMO	A	67	E	E	B	1	0	114	43.34	0	1	0	0	1	-	-	0	0.652	0.0	0.57
1BMO	A	68	L	E	B	1	0	64	49.18	0	1	0	0	1	-	-	0	0.754	0.0	0.32
1BMO	A	69	D	U	O	0	0	43	51.68	5	0	0	1	1	-	-	0	0.798	0.417	0.215
1BMO	A	70	E	T	O	0	0	179	44.89	5	0	0	1	1	-	-	0	0.679	0.417	0.895
1BMO	A	71	N	T	O	0	0	119	50.37	5	0	0	1	0	-	-	0	0.775	0.417	0.595
1BMO	A	72	N	S	O	0	0	113	54.83	5	0	0	1	0	-	-	0	0.853	0.417	0.565
1BMO	A	73	T	U	O	0	0	67	54.26	5	0	0	1	0	-	-	0	0.843	0.417	0.335
1BMO	A	74	P	E	B	1	0	45	53.04	0	1	0	0	0	-	-	0	0.822	0.0	0.225
1BMO	A	75	M	E	B	1	0	94	51.35	0	1	0	0	0	-	-	0	0.792	0.0	0.47
1BMO	A	76	C	E	B	1	0	52	42.16	0	1	0	0	0	-	-	0	0.631	0.0	0.26
1BMO	A	77	V	E	B	1	0	50	37.45	0	1	0	0	0	-	-	0	0.549	0.0	0.25
1BMO	A	78	C	E	B	1	0	51	29.42	0	1	0	0	0	-	-	0	0.408	0.0	0.255
1BMO	A	79	Q	U	O	0	0	34	24.54	2	0	0	1	0	-	-	0	0.323	0.167	0.17
1BMO	A	80	D	U	O	0	0	93	24.68	2	0	0	1	0	-	-	0	0.325	0.167	0.465
1BMO	A	81	P	G	H	0	0	49	24.01	0	0	1	0	0	-	-	0	0.313	0.0	0.245
1BMO	A	82	T	G	H	0	0	115	28.0	0	0	1	0	0	-	-	0	0.383	0.0	0.575
1BMO	A	83	S	G	H	0	0	71	30.11	0	0	1	0	0	-	-	0	0.42	0.0	0.355
1BMO	A	84	C	S	O	0	0	9	29.87	6	0	0	1	0	-	-	0	0.416	0.5	0.045
1BMO	A	85	P	U	O	0	0	105	32.86	6	0	0	1	0	-	-	0	0.468	0.5	0.525
1BMO	A	86	A	U	O	0	0	78	33.02	6	0	0	1	0	-	-	0	0.471	0.5	0.39
1BMO	A	87	P	U	O	0	0	33	34.33	6	0	0	1	0	2450	M10.005	1	0.494	0.5	0.165
1BMO	A	88	I	S	O	0	0	135	37.1	6	0	0	1	0	-	-	0	0.543	0.5	0.675
1BMO	A	89	G	S	O	0	0	26	38.25	6	0	0	1	0	-	-	0	0.563	0.5	0.13
1BMO	A	90	E	G	H	0	0	116	41.73	0	0	1	0	0	-	-	0	0.624	0.0	0.58
1BMO	A	91	F	G	H	0	0	134	41.44	0	0	1	0	0	-	-	0	0.619	0.0	0.67
1BMO	A	92	E	G	H	0	0	74	39.61	0	0	1	0	0	-	-	0	0.587	0.0	0.37
1BMO	A	93	K	U	O	0	0	29	29.85	1	0	0	1	0	-	-	0	0.416	0.083	0.145
1BMO	A	94	V	E	B	1	1	3	24.64	0	1	0	0	0	-	-	0	0.324	0.0	0.015
1BMO	A	95	C	E	B	1	1	0	22.86	0	1	0	0	0	-	-	0	0.293	0.0	0.0
1BMO	A	96	S	E	B	0	1	1	20.66	0	1	0	0	0	-	-	0	0.255	0.0	0.005
1BMO	A	97	N	T	O	0	0	61	22.25	4	0	0	1	0	-	-	0	0.283	0.333	0.305
1BMO	A	98	D	T	O	0	0	94	28.08	4	0	0	1	0	-	-	0	0.385	0.333	0.47
1BMO	A	99	N	S	O	0	0	104	28.69	4	0	0	1	0	-	-	0	0.395	0.333	0.52
1BMO	A	100	K	U	O	0	0	133	24.63	4	0	0	1	0	-	-	0	0.324	0.333	0.665
1BMO	A	101	T	E	B	1	0	75	22.65	0	1	0	0	0	-	-	0	0.29	0.0	0.375
1BMO	A	102	F	E	B	1	0	38	23.39	0	1	0	0	0	-	-	0	0.303	0.0	0.19
1BMO	A	103	D	S	O	0	0	79	30.67	2	0	0	1	0	-	-	0	0.43	0.167	0.395
1BMO	A	104	S	U	O	0	0	13	28.6	2	0	0	1	0	-	-	0	0.394	0.167	0.065
1BMO	A	105	S	H	H	0	0	52	29.11	0	0	1	0	0	-	-	0	0.403	0.0	0.26
1BMO	A	106	C	H	H	0	0	33	29.93	0	0	1	0	0	-	-	0	0.417	0.0	0.165
1BMO	A	107	H	H	H	0	0	24	35.34	0	0	1	0	0	-	-	0	0.512	0.0	0.12
1BMO	A	108	F	H	H	0	0	0	19.0	0	0	1	0	0	-	-	0	0.226	0.0	0.0
1BMO	A	109	F	H	H	0	0	23	22.59	0	0	1	0	0	-	-	0	0.289	0.0	0.115
1BMO	A	110	A	H	H	0	0	1	23.54	0	0	1	0	0	-	-	0	0.305	0.0	0.005
1BMO	A	111	T	H	H	0	0	54	22.28	0	0	1	0	0	-	-	0	0.283	0.0	0.27
1BMO	A	112	K	H	H	0	0	45	21.53	0	0	1	0	0	-	-	0	0.27	0.0	0.225
1BMO	A	113	C	H	H	0	0	11	21.0	0	0	1	0	0	-	-	0	0.261	0.0	0.055
1BMO	A	114	T	T	O	0	0	100	18.16	5	0	0	1	0	-	-	0	0.211	0.417	0.5
1BMO	A	115	L	T	O	0	0	35	14.59	5	0	0	1	0	-	-	0	0.148	0.417	0.175
1BMO	A	116	E	T	O	0	0	139	32.72	5	0	0	1	0	-	-	0	0.466	0.417	0.695
1BMO	A	117	G	T	O	0	0	63	29.32	5	0	0	1	0	-	-	0	0.406	0.417	0.315
1BMO	A	118	T	U	O	0	0	60	32.58	5	0	0	1	0	-	-	0	0.464	0.417	0.3
1BMO	A	119	K	H	H	0	0	156	31.72	0	0	1	0	0	-	-	0	0.448	0.0	0.78
1BMO	A	120	K	H	H	0	0	156	32.56	0	0	1	0	0	-	-	0	0.463	0.0	0.78
1BMO	A	121	G	H	H	0	0	4	32.37	0	0	1	0	0	-	-	0	0.46	0.0	0.02
1BMO	A	122	H	H	H	0	0	115	34.01	0	0	1	0	0	-	-	0	0.489	0.0	0.575
1BMO	A	123	K	H	H	0	0	125	27.06	0	0	1	0	0	-	-	0	0.367	0.0	0.625
1BMO	A	124	L	U	O	0	0	11	22.35	2	0	0	1	0	-	-	0	0.284	0.167	0.055
1BMO	A	125	H	U	O	0	0	15	18.82	2	0	0	1	0	-	-	0	0.222	0.167	0.075
1BMO	A	126	L	E	B	1	0	13	17.14	0	1	0	0	0	-	-	0	0.193	0.0	0.065
1BMO	A	127	D	E	B	0	0	34	15.47	0	1	0	0	0	-	-	0	0.164	0.0	0.17
1BMO	A	128	Y	E	B	1	0	7	15.92	0	1	0	0	0	-	-	0	0.172	0.0	0.035
1BMO	A	129	I	E	B	1	0	80	18.47	0	1	0	0	0	-	-	0	0.216	0.0	0.4
1BMO	A	130	G	S	O	0	0	11	22.92	10	0	0	1	0	-	-	0	0.294	0.833	0.055
1BMO	A	131	P	S	O	0	0	38	26.41	10	0	0	1	0	-	-	0	0.355	0.833	0.19
1BMO	A	132	C	U	O	0	0	33	28.61	10	0	0	1	0	-	-	0	0.394	0.833	0.165
1BMO	A	133	K	U	O	0	0	75	29.61	10	0	0	1	0	-	-	0	0.412	0.833	0.375
1BMO	A	134	Y	U	O	0	0	181	34.7	10	0	0	1	0	-	-	0	0.501	0.833	0.905
1BMO	A	135	I	U	O	0	0	63	34.14	10	0	0	1	0	-	-	0	0.491	0.833	0.315
1BMO	A	136	P	U	O	0	0	51	33.09	10	0	0	1	0	-	-	0	0.472	0.833	0.255
1BMO	A	137	P	U	O	0	0	90	31.84	10	0	0	1	0	-	-	0	0.451	0.833	0.45
1BMO	A	138	C	U	O	0	0	20	29.52	10	0	0	1	0	-	-	0	0.41	0.833	0.1
1BMO	A	139	L	U	O	0	0	99	28.98	10	0	0	1	0	-	-	0	0.4	0.833	0.495
1BMO	A	140	D	H	H	0	0	121	32.55	0	0	1	0	0	-	-	0	0.463	0.0	0.605
1BMO	A	141	S	H	H	0	0	77	27.88	0	0	1	0	0	-	-	0	0.381	0.0	0.385
1BMO	A	142	E	H	H	0	0	36	22.26	0	0	1	0	0	-	-	0	0.283	0.0	0.18
1BMO	A	143	L	H	H	0	0	25	21.87	0	0	1	0	0	-	-	0	0.276	0.0	0.125
1BMO	A	144	T	H	H	0	0	112	26.36	0	0	1	0	0	-	-	0	0.355	0.0	0.56
1BMO	A	145	E	H	H	0	0	38	32.69	0	0	1	0	0	-	-	0	0.465	0.0	0.19
1BMO	A	146	F	H	H	0	0	0	25.21	0	0	1	0	0	-	-	0	0.334	0.0	0.0
1BMO	A	147	P	H	H	0	0	23	28.95	0	0	1	0	0	-	-	0	0.4	0.0	0.115
1BMO	A	148	L	H	H	0	0	28	28.13	0	0	1	0	0	-	-	0	0.386	0.0	0.14
1BMO	A	149	R	H	H	0	0	39	27.14	0	0	1	0	0	2450	M10.005	1	0.368	0.0	0.195
1BMO	A	150	M	H	H	0	0	0	25.4	0	0	1	0	0	-	-	0	0.338	0.0	0.0
1BMO	A	151	R	H	H	0	0	21	22.98	0	0	1	0	0	-	-	0	0.295	0.0	0.105
1BMO	A	152	D	H	H	0	0	14	23.97	0	0	1	0	0	-	-	0	0.313	0.0	0.07
1BMO	A	153	W	H	H	0	0	51	18.87	0	0	1	0	0	-	-	0	0.223	0.0	0.255
1BMO	A	154	L	H	H	0	0	1	19.88	0	0	1	0	0	-	-	0	0.241	0.0	0.005
1BMO	A	155	K	H	H	0	0	0	11.27	0	0	1	0	0	-	-	0	0.09	0.0	0.0
1BMO	A	156	N	H	H	0	0	24	15.57	0	0	1	0	0	-	-	0	0.166	0.0	0.12
1BMO	A	157	V	H	H	0	0	37	11.36	0	0	1	0	0	-	-	0	0.092	0.0	0.185
1BMO	A	158	L	H	H	0	0	1	14.21	0	0	1	0	0	-	-	0	0.142	0.0	0.005
1BMO	A	159	V	H	H	0	0	2	17.28	0	0	1	0	0	-	-	0	0.196	0.0	0.01
1BMO	A	160	T	H	H	0	0	73	21.23	0	0	1	0	0	-	-	0	0.265	0.0	0.365
1BMO	A	161	L	H	H	0	0	25	20.57	0	0	1	0	0	-	-	0	0.253	0.0	0.125
1BMO	A	162	Y	H	H	0	0	40	17.78	0	0	1	0	0	-	-	0	0.204	0.0	0.2
1BMO	A	163	E	H	H	0	0	110	31.6	0	0	1	0	0	-	-	0	0.446	0.0	0.55
1BMO	A	164	R	H	H	0	0	163	34.38	0	0	1	0	0	-	-	0	0.495	0.0	0.815
1BMO	A	165	D	U	O	0	0	15	31.84	8	0	0	1	0	-	-	0	0.451	0.667	0.075
1BMO	A	166	E	S	O	0	0	137	33.33	8	0	0	1	0	-	-	0	0.477	0.667	0.685
1BMO	A	167	D	T	O	0	0	148	41.91	8	0	0	1	0	-	-	0	0.627	0.667	0.74
1BMO	A	168	N	T	O	0	0	71	33.52	8	0	0	1	0	-	-	0	0.48	0.667	0.355
1BMO	A	169	N	S	O	0	0	102	28.64	8	0	0	1	0	-	-	0	0.395	0.667	0.51
1BMO	A	170	L	S	O	0	0	55	23.58	8	0	0	1	0	-	-	0	0.306	0.667	0.275
1BMO	A	171	L	S	O	0	0	0	24.15	8	0	0	1	0	-	-	0	0.316	0.667	0.0
1BMO	A	172	T	U	O	0	0	72	27.05	8	0	0	1	0	-	-	0	0.367	0.667	0.36
1BMO	A	173	E	H	H	0	0	135	33.24	0	0	1	0	0	-	-	0	0.475	0.0	0.675
1BMO	A	174	K	H	H	0	0	126	31.1	0	0	1	0	0	-	-	0	0.438	0.0	0.63
1BMO	A	175	Q	H	H	0	0	20	17.96	0	0	1	0	0	-	-	0	0.207	0.0	0.1
1BMO	A	176	K	H	H	0	0	44	20.17	0	0	1	0	0	-	-	0	0.246	0.0	0.22
1BMO	A	177	L	H	H	0	0	81	8.93	0	0	1	0	0	-	-	0	0.049	0.0	0.405
1BMO	A	178	R	H	H	0	0	81	15.49	0	0	1	0	0	-	-	0	0.164	0.0	0.405
1BMO	A	179	V	H	H	0	0	0	14.68	0	0	1	0	0	-	-	0	0.15	0.0	0.0
1BMO	A	180	K	H	H	0	0	70	12.96	0	0	1	0	0	-	-	0	0.12	0.0	0.35
1BMO	A	181	K	H	H	0	0	135	17.75	0	0	1	0	0	-	-	0	0.204	0.0	0.675
1BMO	A	182	I	H	H	0	0	13	16.83	0	0	1	0	0	-	-	0	0.188	0.0	0.065
1BMO	A	183	H	H	H	0	0	41	26.5	0	0	1	0	0	-	-	0	0.357	0.0	0.205
1BMO	A	184	E	T	O	0	0	100	26.04	12	0	0	1	0	-	-	0	0.349	1.0	0.5
1BMO	A	185	N	U	O	0	0	60	25.8	12	0	0	1	0	-	-	0	0.345	1.0	0.3
1BMO	A	186	E	T	O	0	0	175	27.18	12	0	0	1	0	-	-	0	0.369	1.0	0.875
1BMO	A	187	K	T	O	0	0	134	30.56	12	0	0	1	0	-	-	0	0.428	1.0	0.67
1BMO	A	188	R	S	O	0	0	54	15.83	12	0	0	1	0	-	-	0	0.17	1.0	0.27
1BMO	A	189	L	U	O	0	0	31	21.87	12	0	0	1	0	-	-	0	0.276	1.0	0.155
1BMO	A	190	E	U	O	0	0	153	26.57	12	0	0	1	0	-	-	0	0.358	1.0	0.765
1BMO	A	191	A	U	O	0	0	65	27.63	12	0	0	1	0	-	-	0	0.377	1.0	0.325
1BMO	A	192	G	S	O	0	0	43	30.93	12	0	0	1	0	-	-	0	0.435	1.0	0.215
1BMO	A	193	D	U	O	0	0	148	30.69	12	0	0	1	0	-	-	0	0.43	1.0	0.74
1BMO	A	194	H	U	O	0	0	31	31.69	12	0	0	1	0	-	-	0	0.448	1.0	0.155
1BMO	A	195	P	U	O	0	0	60	30.9	12	0	0	1	0	-	-	0	0.434	1.0	0.3
1BMO	A	196	V	H	H	0	0	50	31.16	0	0	1	0	0	-	-	0	0.439	0.0	0.25
1BMO	A	197	E	H	H	0	0	146	40.58	0	0	1	0	0	2450	M10.008&M10.013&M10.004&M10.005&M10.003	1	0.604	0.0	0.73
1BMO	A	198	L	H	H	0	0	65	24.05	0	0	1	0	0	-	-	0	0.314	0.0	0.325
1BMO	A	199	L	H	H	0	0	5	29.01	0	0	1	0	0	-	-	0	0.401	0.0	0.025
1BMO	A	200	A	H	H	0	0	33	28.4	0	0	1	0	0	-	-	0	0.39	0.0	0.165
1BMO	A	201	R	H	H	0	0	115	28.53	0	0	1	0	0	-	-	0	0.393	0.0	0.575
1BMO	A	202	D	H	H	0	0	15	26.97	0	0	1	0	0	-	-	0	0.365	0.0	0.075
1BMO	A	203	F	H	H	0	0	26	22.29	0	0	1	0	0	-	-	0	0.283	0.0	0.13
1BMO	A	204	E	H	H	0	0	120	39.71	0	0	1	0	0	-	-	0	0.588	0.0	0.6
1BMO	A	205	K	H	H	0	0	142	26.32	0	0	1	0	0	-	-	0	0.354	0.0	0.71
1BMO	A	206	N	T	O	0	0	24	22.1	2	0	0	1	0	-	-	0	0.28	0.167	0.12
1BMO	A	207	Y	T	O	0	0	42	15.16	2	0	0	1	0	-	-	0	0.158	0.167	0.21
1BMO	A	208	N	H	H	0	0	131	18.55	0	0	1	0	0	-	-	0	0.218	0.0	0.655
1BMO	A	209	M	H	H	0	0	7	17.29	0	0	1	0	0	-	-	0	0.196	0.0	0.035
1BMO	A	210	Y	H	H	0	0	3	14.85	0	0	1	0	0	-	-	0	0.153	0.0	0.015
1BMO	A	211	I	H	H	0	0	16	12.66	0	0	1	0	0	-	-	0	0.115	0.0	0.08
1BMO	A	212	F	H	H	0	0	10	9.54	0	0	1	0	0	-	-	0	0.06	0.0	0.05
1BMO	A	213	P	H	H	0	0	1	10.88	0	0	1	0	0	-	-	0	0.083	0.0	0.005
1BMO	A	214	V	H	H	0	0	0	7.56	0	0	1	0	0	-	-	0	0.025	0.0	0.0
1BMO	A	215	H	H	H	0	0	0	11.58	0	0	1	0	0	-	-	0	0.096	0.0	0.0
1BMO	A	216	W	H	H	0	0	11	15.54	0	0	1	0	0	-	-	0	0.165	0.0	0.055
1BMO	A	217	Q	H	H	0	0	14	18.53	0	0	1	0	0	-	-	0	0.217	0.0	0.07
1BMO	A	218	F	H	H	0	0	2	14.95	0	0	1	0	0	-	-	0	0.155	0.0	0.01
1BMO	A	219	G	H	H	0	0	12	16.53	0	0	1	0	0	-	-	0	0.182	0.0	0.06
1BMO	A	220	Q	H	H	0	0	82	19.49	0	0	1	0	0	-	-	0	0.234	0.0	0.41
1BMO	A	221	L	H	H	0	0	12	18.8	0	0	1	0	0	-	-	0	0.222	0.0	0.06
1BMO	A	222	D	U	O	0	0	10	24.58	7	0	0	1	0	-	-	0	0.323	0.583	0.05
1BMO	A	223	Q	U	O	0	0	88	31.58	7	0	0	1	0	-	-	0	0.446	0.583	0.44
1BMO	A	224	H	S	O	0	0	71	37.11	7	0	0	1	0	-	-	0	0.543	0.583	0.355
1BMO	A	225	P	S	O	0	0	59	30.01	7	0	0	1	0	-	-	0	0.419	0.583	0.295
1BMO	A	226	I	U	O	0	0	109	25.88	7	0	0	1	0	-	-	0	0.346	0.583	0.545
1BMO	A	227	D	S	O	0	0	75	18.08	7	0	0	1	0	-	-	0	0.21	0.583	0.375
1BMO	A	228	G	S	O	0	0	27	12.82	7	0	0	1	0	-	-	0	0.117	0.583	0.135
1BMO	A	229	Y	E	B	1	0	102	6.98	0	1	0	0	0	-	-	0	0.015	0.0	0.51
1BMO	A	230	L	E	B	1	0	0	6.12	0	1	0	0	0	-	-	0	0.0	0.0	0.0
1BMO	A	231	S	U	O	0	0	10	7.28	5	0	0	1	0	-	-	0	0.02	0.417	0.05
1BMO	A	232	H	T	O	0	0	41	9.04	5	0	0	1	0	-	-	0	0.051	0.417	0.205
1BMO	A	233	T	T	O	0	0	6	12.52	5	0	0	1	0	-	-	0	0.112	0.417	0.03
1BMO	A	234	E	T	O	0	0	8	11.94	5	0	0	1	0	-	-	0	0.102	0.417	0.04
1BMO	A	235	L	T	O	0	0	7	10.75	5	0	0	1	0	-	-	0	0.081	0.417	0.035
1BMO	A	236	A	G	H	0	0	1	9.88	0	0	1	0	0	-	-	0	0.066	0.0	0.005
1BMO	A	237	P	G	H	0	0	62	9.08	0	0	1	0	0	2450	M10.013&M10.005&M10.008&M10.003	1	0.052	0.0	0.31
1BMO	A	238	L	G	H	0	0	1	7.5	0	0	1	0	0	-	-	0	0.024	0.0	0.005
1BMO	A	239	R	G	H	0	0	13	8.88	0	0	1	0	0	-	-	0	0.048	0.0	0.065
1BMO	A	240	A	S	O	0	0	28	14.92	6	0	0	1	0	-	-	0	0.154	0.5	0.14
1BMO	A	241	P	T	O	0	0	96	19.01	6	0	0	1	0	-	-	0	0.226	0.5	0.48
1BMO	A	242	L	T	O	0	0	145	20.69	6	0	0	1	0	-	-	0	0.255	0.5	0.725
1BMO	A	243	I	S	O	0	0	5	21.62	6	0	0	1	0	-	-	0	0.272	0.5	0.025
1BMO	A	244	P	T	O	0	0	35	21.67	6	0	0	1	0	-	-	0	0.272	0.5	0.175
1BMO	A	245	M	T	O	0	0	43	22.4	6	0	0	1	0	-	-	0	0.285	0.5	0.215
1BMO	A	246	E	G	H	0	0	36	24.95	0	0	1	0	0	-	-	0	0.33	0.0	0.18
1BMO	A	247	H	G	H	0	0	39	20.06	0	0	1	0	0	-	-	0	0.244	0.0	0.195
1BMO	A	248	C	G	H	0	0	0	19.93	0	0	1	0	0	-	-	0	0.242	0.0	0.0
1BMO	A	249	T	H	H	0	0	0	15.53	0	0	1	0	0	-	-	0	0.165	0.0	0.0
1BMO	A	250	T	H	H	0	0	39	16.95	0	0	1	0	0	-	-	0	0.19	0.0	0.195
1BMO	A	251	R	H	H	0	0	81	24.07	0	0	1	0	0	-	-	0	0.314	0.0	0.405
1BMO	A	252	F	H	H	0	0	6	18.22	0	0	1	0	0	-	-	0	0.212	0.0	0.03
1BMO	A	253	F	H	H	0	0	8	7.55	0	0	1	0	0	-	-	0	0.025	0.0	0.04
1BMO	A	254	E	H	H	0	0	115	23.56	0	0	1	0	0	-	-	0	0.306	0.0	0.575
1BMO	A	255	T	H	H	0	0	82	20.64	0	0	1	0	0	-	-	0	0.254	0.0	0.41
1BMO	A	256	C	H	H	0	0	2	18.45	0	0	1	0	0	-	-	0	0.216	0.0	0.01
1BMO	A	257	D	U	O	0	0	10	19.69	7	0	0	1	0	-	-	0	0.238	0.583	0.05
1BMO	A	258	L	T	O	0	0	137	11.09	7	0	0	1	0	-	-	0	0.087	0.583	0.685
1BMO	A	259	D	T	O	0	0	110	15.89	7	0	0	1	0	-	-	0	0.171	0.583	0.55
1BMO	A	260	N	U	O	0	0	93	19.04	7	0	0	1	0	-	-	0	0.226	0.583	0.465
1BMO	A	261	D	S	O	0	0	63	20.45	7	0	0	1	0	-	-	0	0.251	0.583	0.315
1BMO	A	262	K	S	O	0	0	120	24.12	7	0	0	1	0	-	-	0	0.315	0.583	0.6
1BMO	A	263	Y	U	O	0	0	78	20.47	7	0	0	1	0	-	-	0	0.251	0.583	0.39
1BMO	A	264	I	E	B	1	0	4	17.12	0	1	0	0	0	-	-	0	0.193	0.0	0.02
1BMO	A	265	A	E	B	1	0	12	15.47	0	1	0	0	0	-	-	0	0.164	0.0	0.06
1BMO	A	266	L	H	H	0	0	23	9.99	0	0	1	0	0	-	-	0	0.068	0.0	0.115
1BMO	A	267	D	H	H	0	0	97	21.79	0	0	1	0	0	-	-	0	0.275	0.0	0.485
1BMO	A	268	E	H	H	0	0	11	17.02	0	0	1	0	0	-	-	0	0.191	0.0	0.055
1BMO	A	269	W	H	H	0	0	0	12.36	0	0	1	0	0	-	-	0	0.109	0.0	0.0
1BMO	A	270	A	H	H	0	0	0	14.39	0	0	1	0	0	-	-	0	0.145	0.0	0.0
1BMO	A	271	G	H	H	0	0	45	15.64	0	0	1	0	0	-	-	0	0.167	0.0	0.225
1BMO	A	272	C	H	H	0	0	30	15.44	0	0	1	0	0	-	-	0	0.163	0.0	0.15
1BMO	A	273	F	T	O	0	0	0	11.55	4	0	0	1	0	-	-	0	0.095	0.333	0.0
1BMO	A	274	G	T	O	0	0	33	13.84	4	0	0	1	0	-	-	0	0.135	0.333	0.165
1BMO	A	275	I	U	O	0	0	3	14.77	4	0	0	1	0	-	-	0	0.152	0.333	0.015
1BMO	A	276	K	U	O	0	0	127	27.91	4	0	0	1	0	-	-	0	0.382	0.333	0.635
1BMO	A	277	Q	G	H	0	0	169	26.74	0	0	1	0	1	-	-	0	0.361	0.0	0.845
1BMO	A	278	K	G	H	0	0	180	40.39	0	0	1	0	1	-	-	0	0.6	0.0	0.9
1BMO	A	279	D	G	H	0	0	59	34.1	0	0	1	0	1	-	-	0	0.49	0.0	0.295
1BMO	A	280	I	U	O	0	0	38	31.26	2	0	0	1	1	-	-	0	0.44	0.167	0.19
1BMO	A	281	D	U	O	0	0	67	35.15	2	0	0	1	1	-	-	0	0.509	0.167	0.335
1BMO	A	282	K	G	H	0	0	173	32.68	0	0	1	0	1	-	-	0	0.465	0.0	0.865
1BMO	A	283	D	G	H	0	0	110	43.27	0	0	1	0	1	-	-	0	0.651	0.0	0.55
1BMO	A	284	L	G	H	0	0	14	29.97	0	0	1	0	1	-	-	0	0.418	0.0	0.07
1BMO	A	285	V	T	O	0	0	23	31.18	2	0	0	1	1	-	-	0	0.439	0.167	0.115
1BMO	A	286	I	U	O	0	0	152	35.28	2	0	0	1	1	-	-	0	0.511	0.167	0.76
1BUU	A	73	A	U	O	0	0	107	96.02	1	0	0	1	1	-	-	0	1.0	0.05	0.535
1BUU	A	74	I	H	H	0	0	139	95.79	0	0	1	0	1	-	-	0	0.997	0.0	0.695
1BUU	A	75	E	H	H	0	0	148	95.61	0	0	1	0	1	-	-	0	0.995	0.0	0.74
1BUU	A	76	V	H	H	0	0	78	90.79	0	0	1	0	1	-	-	0	0.936	0.0	0.39
1BUU	A	77	K	H	H	0	0	145	87.7	0	0	1	0	1	-	-	0	0.898	0.0	0.725
1BUU	A	78	L	H	H	0	0	105	81.02	0	0	1	0	1	-	-	0	0.817	0.0	0.525
1BUU	A	79	A	H	H	0	0	43	74.32	0	0	1	0	1	-	-	0	0.735	0.0	0.215
1BUU	A	80	N	H	H	0	0	107	70.51	0	0	1	0	1	2588	M10.003&M10.014&M10.004	1	0.688	0.0	0.535
1BUU	A	81	M	H	H	0	0	116	65.96	0	0	1	0	1	-	-	0	0.633	0.0	0.58
1BUU	A	82	E	H	H	0	0	124	59.54	0	0	1	0	1	-	-	0	0.555	0.0	0.62
1BUU	A	83	A	H	H	0	0	50	47.81	0	0	1	0	1	-	-	0	0.411	0.0	0.25
1BUU	A	84	E	H	H	0	0	113	46.63	0	0	1	0	1	-	-	0	0.397	0.0	0.565
1BUU	A	85	I	H	H	0	0	91	35.71	0	0	1	0	1	-	-	0	0.264	0.0	0.455
1BUU	A	86	N	H	H	0	0	76	33.63	0	0	1	0	1	-	-	0	0.238	0.0	0.38
1BUU	A	87	T	H	H	0	0	61	27.82	0	0	1	0	1	-	-	0	0.167	0.0	0.305
1BUU	A	88	L	H	H	0	0	102	25.58	0	0	1	0	1	-	-	0	0.14	0.0	0.51
1BUU	A	89	K	H	H	0	0	116	28.75	0	0	1	0	1	-	-	0	0.179	0.0	0.58
1BUU	A	90	S	H	H	0	0	74	19.14	0	0	1	0	1	-	-	0	0.061	0.0	0.37
1BUU	A	91	K	H	H	0	0	132	20.28	0	0	1	0	1	-	-	0	0.075	0.0	0.66
1BUU	A	92	L	H	H	0	0	101	18.86	0	0	1	0	1	-	-	0	0.058	0.0	0.505
1BUU	A	93	E	H	H	0	0	116	23.49	0	0	1	0	1	-	-	0	0.114	0.0	0.58
1BUU	A	94	L	H	H	0	0	113	16.04	0	0	1	0	1	-	-	0	0.023	0.0	0.565
1BUU	A	95	T	H	H	0	0	84	14.21	0	0	1	0	1	-	-	0	0.001	0.0	0.42
1BUU	A	96	N	H	H	0	0	94	15.04	0	0	1	0	1	-	-	0	0.011	0.0	0.47
1BUU	A	97	K	H	H	0	0	148	23.67	0	0	1	0	1	-	-	0	0.116	0.0	0.74
1BUU	A	98	L	H	H	0	0	106	15.54	0	0	1	0	1	-	-	0	0.017	0.0	0.53
1BUU	A	99	H	H	H	0	0	98	24.19	0	0	1	0	1	-	-	0	0.123	0.0	0.49
1BUU	A	100	A	H	H	0	0	14	17.2	0	0	1	0	1	-	-	0	0.037	0.0	0.07
1BUU	A	101	F	H	H	0	0	156	15.37	0	0	1	0	1	-	-	0	0.015	0.0	0.78
1BUU	A	102	S	H	H	0	0	83	19.06	0	0	1	0	1	-	-	0	0.06	0.0	0.415
1BUU	A	103	M	T	O	0	0	58	23.85	8	0	0	1	1	-	-	0	0.119	0.4	0.29
1BUU	A	104	G	T	O	0	0	33	19.51	8	0	0	1	1	-	-	0	0.066	0.4	0.165
1BUU	A	105	K	U	O	0	0	44	19.42	8	0	0	1	0	-	-	0	0.065	0.4	0.22
1BUU	A	106	K	U	O	0	0	132	22.91	8	0	0	1	0	-	-	0	0.107	0.4	0.66
1BUU	A	107	S	T	O	0	0	124	24.1	8	0	0	1	0	-	-	0	0.122	0.4	0.62
1BUU	A	108	G	T	O	0	0	59	26.63	8	0	0	1	0	-	-	0	0.153	0.4	0.295
1BUU	A	109	K	S	O	0	0	83	27.39	8	0	0	1	0	-	-	0	0.162	0.4	0.415
1BUU	A	110	K	U	O	0	0	39	28.64	8	0	0	1	0	-	-	0	0.177	0.4	0.195
1BUU	A	111	F	E	B	1	0	22	20.0	0	1	0	0	0	-	-	0	0.072	0.0	0.11
1BUU	A	112	F	E	B	1	0	13	22.0	0	1	0	0	0	-	-	0	0.096	0.0	0.065
1BUU	A	113	V	E	B	1	0	40	17.36	0	1	0	0	0	-	-	0	0.039	0.0	0.2
1BUU	A	114	T	E	B	1	0	26	17.48	0	1	0	0	0	-	-	0	0.041	0.0	0.13
1BUU	A	115	N	E	B	0	0	87	18.24	0	1	0	0	0	-	-	0	0.05	0.0	0.435
1BUU	A	116	H	E	B	0	0	102	21.7	0	1	0	0	0	-	-	0	0.092	0.0	0.51
1BUU	A	117	E	E	B	0	0	98	23.26	0	1	0	0	0	-	-	0	0.111	0.0	0.49
1BUU	A	118	R	E	B	1	0	106	31.9	0	1	0	0	0	-	-	0	0.217	0.0	0.53
1BUU	A	119	M	E	B	1	0	10	22.0	0	1	0	0	0	-	-	0	0.096	0.0	0.05
1BUU	A	120	P	U	O	0	0	21	19.83	1	0	0	1	0	-	-	0	0.07	0.05	0.105
1BUU	A	121	F	H	H	0	0	3	17.46	0	0	1	0	0	-	-	0	0.041	0.0	0.015
1BUU	A	122	S	H	H	0	0	70	19.13	0	0	1	0	0	-	-	0	0.061	0.0	0.35
1BUU	A	123	K	H	H	0	0	124	24.37	0	0	1	0	0	-	-	0	0.125	0.0	0.62
1BUU	A	124	V	H	H	0	0	0	15.43	0	0	1	0	0	-	-	0	0.016	0.0	0.0
1BUU	A	125	K	H	H	0	0	85	21.8	0	0	1	0	0	-	-	0	0.094	0.0	0.425
1BUU	A	126	A	H	H	0	0	62	16.94	0	0	1	0	0	-	-	0	0.034	0.0	0.31
1BUU	A	127	L	H	H	0	0	41	17.58	0	0	1	0	0	-	-	0	0.042	0.0	0.205
1BUU	A	128	C	H	H	0	0	1	15.84	0	0	1	0	0	-	-	0	0.021	0.0	0.005
1BUU	A	129	S	H	H	0	0	67	18.6	0	0	1	0	0	-	-	0	0.055	0.0	0.335
1BUU	A	130	E	H	H	0	0	153	26.86	0	0	1	0	0	-	-	0	0.155	0.0	0.765
1BUU	A	131	L	T	O	0	0	93	16.57	3	0	0	1	0	-	-	0	0.03	0.15	0.465
1BUU	A	132	R	T	O	0	0	200	19.09	3	0	0	1	0	-	-	0	0.061	0.15	1.0
1BUU	A	133	G	S	O	0	0	21	15.16	3	0	0	1	0	-	-	0	0.013	0.15	0.105
1BUU	A	134	T	E	B	1	0	35	16.54	0	1	0	0	0	-	-	0	0.029	0.0	0.175
1BUU	A	135	V	E	B	1	0	1	14.13	0	1	0	0	0	-	-	0	0.0	0.0	0.005
1BUU	A	136	A	U	O	0	0	0	16.64	5	0	0	1	0	-	-	0	0.031	0.25	0.0
1BUU	A	137	I	U	O	0	0	0	24.1	5	0	0	1	0	-	-	0	0.122	0.25	0.0
1BUU	A	138	P	U	O	0	0	0	22.62	5	0	0	1	0	-	-	0	0.104	0.25	0.0
1BUU	A	139	R	U	O	0	0	81	31.35	5	0	0	1	0	-	-	0	0.21	0.25	0.405
1BUU	A	140	N	S	O	0	0	62	27.9	5	0	0	1	0	-	-	0	0.168	0.25	0.31
1BUU	A	141	A	H	H	0	0	68	28.43	0	0	1	0	0	-	-	0	0.175	0.0	0.34
1BUU	A	142	E	H	H	0	0	100	36.37	0	0	1	0	0	-	-	0	0.272	0.0	0.5
1BUU	A	143	E	H	H	0	0	30	24.06	0	0	1	0	0	-	-	0	0.121	0.0	0.15
1BUU	A	144	N	H	H	0	0	8	25.3	0	0	1	0	0	-	-	0	0.136	0.0	0.04
1BUU	A	145	K	H	H	0	0	117	33.17	0	0	1	0	0	-	-	0	0.233	0.0	0.585
1BUU	A	146	A	H	H	0	0	31	26.79	0	0	1	0	0	-	-	0	0.155	0.0	0.155
1BUU	A	147	I	H	H	0	0	0	28.2	0	0	1	0	0	-	-	0	0.172	0.0	0.0
1BUU	A	148	Q	H	H	0	0	45	39.0	0	0	1	0	0	-	-	0	0.304	0.0	0.225
1BUU	A	149	E	H	H	0	0	111	38.0	0	0	1	0	0	-	-	0	0.291	0.0	0.555
1BUU	A	150	V	H	H	0	0	42	30.14	0	0	1	0	0	-	-	0	0.196	0.0	0.21
1BUU	A	151	A	H	H	0	0	1	32.89	0	0	1	0	0	-	-	0	0.229	0.0	0.005
1BUU	A	152	K	U	O	0	0	157	41.39	3	0	0	1	0	-	-	0	0.333	0.15	0.785
1BUU	A	153	T	S	O	0	0	59	34.52	3	0	0	1	0	-	-	0	0.249	0.15	0.295
1BUU	A	154	S	U	O	0	0	22	24.02	3	0	0	1	0	-	-	0	0.121	0.15	0.11
1BUU	A	155	A	E	B	1	1	0	19.6	0	1	0	0	0	-	-	0	0.067	0.0	0.0
1BUU	A	156	F	E	B	1	0	0	16.95	0	1	0	0	0	-	-	0	0.034	0.0	0.0
1BUU	A	157	L	U	O	0	0	0	18.14	2	0	0	1	0	-	-	0	0.049	0.1	0.0
1BUU	A	158	G	S	O	0	0	0	16.36	2	0	0	1	0	-	-	0	0.027	0.1	0.0
1BUU	A	159	I	E	B	1	0	0	20.65	0	1	0	0	0	-	-	0	0.08	0.0	0.0
1BUU	A	160	T	E	B	1	0	11	16.37	0	1	0	0	0	-	-	0	0.027	0.0	0.055
1BUU	A	161	D	U	O	0	0	1	15.39	8	0	0	1	0	-	-	0	0.015	0.4	0.005
1BUU	A	162	E	S	O	0	0	95	24.09	8	0	0	1	0	-	-	0	0.122	0.4	0.475
1BUU	A	163	V	S	O	0	0	133	20.7	8	0	0	1	0	-	-	0	0.08	0.4	0.665
1BUU	A	164	T	S	O	0	0	78	19.5	8	0	0	1	0	-	-	0	0.066	0.4	0.39
1BUU	A	165	E	T	O	0	0	57	14.92	8	0	0	1	0	-	-	0	0.01	0.4	0.285
1BUU	A	166	G	T	O	0	0	5	19.15	8	0	0	1	0	-	-	0	0.061	0.4	0.025
1BUU	A	167	Q	U	O	0	0	85	25.39	8	0	0	1	0	-	-	0	0.138	0.4	0.425
1BUU	A	168	F	U	O	0	0	0	17.93	8	0	0	1	0	-	-	0	0.046	0.4	0.0
1BUU	A	169	M	E	B	1	1	68	21.3	0	1	0	0	0	-	-	0	0.088	0.0	0.34
1BUU	A	170	Y	E	B	1	0	11	20.5	0	1	0	0	0	-	-	0	0.078	0.0	0.055
1BUU	A	171	V	T	O	0	0	52	27.02	20	0	0	1	0	-	-	0	0.157	1.0	0.26
1BUU	A	172	T	T	O	0	0	95	32.54	20	0	0	1	0	-	-	0	0.225	1.0	0.475
1BUU	A	173	G	S	O	0	0	45	31.48	20	0	0	1	0	-	-	0	0.212	1.0	0.225
1BUU	A	174	G	S	O	0	0	31	29.58	20	0	0	1	0	-	-	0	0.189	1.0	0.155
1BUU	A	175	R	B	O	1	0	103	31.18	20	0	0	1	0	-	-	0	0.208	1.0	0.515
1BUU	A	176	L	U	O	0	0	31	27.4	20	0	0	1	0	-	-	0	0.162	1.0	0.155
1BUU	A	177	T	S	O	0	0	112	29.25	20	0	0	1	0	-	-	0	0.185	1.0	0.56
1BUU	A	178	Y	U	O	0	0	50	24.9	20	0	0	1	0	-	-	0	0.132	1.0	0.25
1BUU	A	179	S	U	O	0	0	54	25.63	20	0	0	1	0	-	-	0	0.14	1.0	0.27
1BUU	A	180	N	U	O	0	0	52	28.38	20	0	0	1	0	-	-	0	0.174	1.0	0.26
1BUU	A	181	W	B	O	1	0	23	23.88	20	0	0	1	0	-	-	0	0.119	1.0	0.115
1BUU	A	182	K	S	O	0	0	117	44.16	20	0	0	1	0	-	-	0	0.367	1.0	0.585
1BUU	A	183	K	S	O	0	0	182	46.05	20	0	0	1	0	-	-	0	0.39	1.0	0.91
1BUU	A	184	D	S	O	0	0	108	39.57	20	0	0	1	0	-	-	0	0.311	1.0	0.54
1BUU	A	185	E	S	O	0	0	52	25.97	20	0	0	1	0	-	-	0	0.145	1.0	0.26
1BUU	A	186	P	U	O	0	0	17	21.77	20	0	0	1	0	-	-	0	0.093	1.0	0.085
1BUU	A	187	N	U	O	0	0	72	20.82	20	0	0	1	0	-	-	0	0.082	1.0	0.36
1BUU	A	188	D	U	O	0	0	19	19.3	20	0	0	1	0	-	-	0	0.063	1.0	0.095
1BUU	A	189	H	T	O	0	0	166	23.6	20	0	0	1	0	-	-	0	0.116	1.0	0.83
1BUU	A	190	G	T	O	0	0	71	21.04	20	0	0	1	0	-	-	0	0.084	1.0	0.355
1BUU	A	191	S	S	O	0	0	72	22.94	20	0	0	1	0	-	-	0	0.108	1.0	0.36
1BUU	A	192	G	U	O	0	0	37	21.89	20	0	0	1	0	-	-	0	0.095	1.0	0.185
1BUU	A	193	E	U	O	0	0	56	21.82	20	0	0	1	0	-	-	0	0.094	1.0	0.28
1BUU	A	194	D	U	O	0	0	33	17.32	20	0	0	1	0	-	-	0	0.039	1.0	0.165
1BUU	A	195	C	E	B	0	1	0	16.73	0	1	0	0	0	-	-	0	0.032	0.0	0.0
1BUU	A	196	V	E	B	0	1	0	17.52	0	1	0	0	0	-	-	0	0.041	0.0	0.0
1BUU	A	197	T	E	B	1	1	3	22.21	0	1	0	0	0	-	-	0	0.099	0.0	0.015
1BUU	A	198	I	E	B	1	1	2	26.33	0	1	0	0	0	-	-	0	0.149	0.0	0.01
1BUU	A	199	V	U	O	0	0	29	36.3	5	0	0	1	0	-	-	0	0.271	0.25	0.145
1BUU	A	200	D	T	O	0	0	122	46.26	5	0	0	1	0	-	-	0	0.392	0.25	0.61
1BUU	A	201	N	T	O	0	0	91	42.98	5	0	0	1	0	-	-	0	0.352	0.25	0.455
1BUU	A	202	G	S	O	0	0	1	32.91	5	0	0	1	0	-	-	0	0.229	0.25	0.005
1BUU	A	203	L	U	O	0	0	60	28.87	5	0	0	1	0	-	-	0	0.18	0.25	0.3
1BUU	A	204	W	E	B	1	1	0	23.62	0	1	0	0	0	-	-	0	0.116	0.0	0.0
1BUU	A	205	N	E	B	0	1	25	30.12	0	1	0	0	0	-	-	0	0.195	0.0	0.125
1BUU	A	206	D	E	B	0	1	28	20.95	0	1	0	0	0	-	-	0	0.083	0.0	0.14
1BUU	A	207	I	E	B	0	1	50	22.44	0	1	0	0	0	-	-	0	0.101	0.0	0.25
1BUU	A	208	S	U	O	0	0	46	18.55	5	0	0	1	0	-	-	0	0.054	0.25	0.23
1BUU	A	209	C	T	O	0	0	15	18.77	5	0	0	1	0	-	-	0	0.057	0.25	0.075
1BUU	A	210	Q	T	O	0	0	143	28.58	5	0	0	1	0	-	-	0	0.176	0.25	0.715
1BUU	A	211	A	S	O	0	0	33	21.77	5	0	0	1	1	-	-	0	0.093	0.25	0.165
1BUU	A	212	S	U	O	0	0	60	21.76	5	0	0	1	1	-	-	0	0.093	0.25	0.3
1BUU	A	213	H	E	B	1	0	25	21.09	0	1	0	0	1	-	-	0	0.085	0.0	0.125
1BUU	A	214	T	E	B	1	1	1	19.83	0	1	0	0	1	-	-	0	0.07	0.0	0.005
1BUU	A	215	A	E	B	0	0	2	17.98	0	1	0	0	1	-	-	0	0.047	0.0	0.01
1BUU	A	216	V	E	B	1	0	0	16.47	0	1	0	0	1	-	-	0	0.029	0.0	0.0
1BUU	A	217	C	E	B	1	1	6	16.11	0	1	0	0	1	-	-	0	0.024	0.0	0.03
1BUU	A	218	E	E	B	1	1	18	17.48	0	1	0	0	1	-	-	0	0.041	0.0	0.09
1BUU	A	219	F	E	B	1	0	35	16.39	0	1	0	0	1	-	-	0	0.028	0.0	0.175
1BUU	A	220	P	U	O	0	0	100	19.32	2	0	0	1	1	-	-	0	0.063	0.1	0.5
1BUU	A	221	A	U	O	0	0	92	22.37	2	0	0	1	1	-	-	0	0.101	0.1	0.46
1C0B	A	1	K	U	O	0	0	125	90.12	3	0	0	1	1	-	-	0	0.87	0.3	0.625
1C0B	A	2	E	U	O	0	0	164	97.83	3	0	0	1	1	-	-	0	0.979	0.3	0.82
1C0B	A	3	T	S	O	0	0	107	93.59	3	0	0	1	1	-	-	0	0.919	0.3	0.535
1C0B	A	4	A	H	H	0	0	33	75.9	0	0	1	0	1	-	-	0	0.671	0.0	0.165
1C0B	A	5	A	H	H	0	0	27	54.63	0	0	1	0	1	-	-	0	0.372	0.0	0.135
1C0B	A	6	A	H	H	0	0	48	52.38	0	0	1	0	1	-	-	0	0.341	0.0	0.24
1C0B	A	7	K	H	H	0	0	75	43.29	0	0	1	0	1	-	-	0	0.213	0.0	0.375
1C0B	A	8	F	H	H	0	0	5	39.52	0	0	1	0	1	-	-	0	0.16	0.0	0.025
1C0B	A	9	E	H	H	0	0	111	56.14	0	0	1	0	1	-	-	0	0.393	0.0	0.555
1C0B	A	10	R	H	H	0	0	123	53.86	0	0	1	0	1	-	-	0	0.361	0.0	0.615
1C0B	A	11	Q	H	H	0	0	27	57.68	0	0	1	0	1	-	-	0	0.415	0.0	0.135
1C0B	A	12	H	H	H	0	0	17	28.1	0	0	1	0	1	-	-	0	0.0	0.0	0.085
1C0B	A	13	M	B	O	1	0	10	45.0	10	0	0	1	1	-	-	0	0.237	1.0	0.05
1C0B	A	14	D	U	O	0	0	16	48.12	10	0	0	1	1	2776	A01.042	1	0.281	1.0	0.08
1C0B	A	15	S	T	O	0	0	58	71.06	10	0	0	1	1	-	-	0	0.603	1.0	0.29
1C0B	A	16	S	T	O	0	0	105	69.45	10	0	0	1	0	-	-	0	0.58	1.0	0.525
1C0B	A	17	T	S	O	0	0	54	71.28	10	0	0	1	0	-	-	0	0.606	1.0	0.27
1C0B	A	18	S	S	O	0	0	103	65.37	10	0	0	1	0	-	-	0	0.523	1.0	0.515
1C0B	A	19	A	U	O	0	0	37	58.05	10	0	0	1	0	-	-	0	0.42	1.0	0.185
1C0B	A	20	A	U	O	0	0	9	68.23	10	0	0	1	0	-	-	0	0.563	1.0	0.045
1C0B	A	21	S	U	O	0	0	126	86.3	10	0	0	1	0	-	-	0	0.817	1.0	0.63
1C0B	A	22	S	S	O	0	0	55	86.29	10	0	0	1	0	-	-	0	0.817	1.0	0.275
1C0B	A	23	S	H	H	0	0	52	75.61	0	0	1	0	0	-	-	0	0.667	0.0	0.26
1C0B	A	24	N	H	H	0	0	104	78.96	0	0	1	0	0	-	-	0	0.714	0.0	0.52
1C0B	A	25	Y	H	H	0	0	20	43.26	0	0	1	0	0	-	-	0	0.213	0.0	0.1
1C0B	A	26	C	H	H	0	0	0	39.1	0	0	1	0	0	-	-	0	0.154	0.0	0.0
1C0B	A	27	N	H	H	0	0	52	53.85	0	0	1	0	0	-	-	0	0.361	0.0	0.26
1C0B	A	28	Q	H	H	0	0	98	62.88	0	0	1	0	0	-	-	0	0.488	0.0	0.49
1C0B	A	29	M	H	H	0	0	9	43.95	0	0	1	0	0	-	-	0	0.222	0.0	0.045
1C0B	A	30	M	H	H	0	0	0	39.94	0	0	1	0	0	-	-	0	0.166	0.0	0.0
1C0B	A	31	K	H	H	0	0	147	67.4	0	0	1	0	0	-	-	0	0.552	0.0	0.735
1C0B	A	32	S	H	H	0	0	70	56.72	0	0	1	0	0	-	-	0	0.402	0.0	0.35
1C0B	A	33	R	T	O	0	0	58	44.92	10	0	0	1	0	-	-	0	0.236	1.0	0.29
1C0B	A	34	N	T	O	0	0	97	69.64	10	0	0	1	0	-	-	0	0.583	1.0	0.485
1C0B	A	35	L	U	O	0	0	12	52.74	10	0	0	1	0	-	-	0	0.346	1.0	0.06
1C0B	A	36	T	S	O	0	0	34	80.57	10	0	0	1	0	-	-	0	0.736	1.0	0.17
1C0B	A	37	K	S	O	0	0	126	87.91	10	0	0	1	0	-	-	0	0.839	1.0	0.63
1C0B	A	38	D	S	O	0	0	161	86.33	10	0	0	1	0	-	-	0	0.817	1.0	0.805
1C0B	A	39	R	S	O	0	0	200	84.06	10	0	0	1	0	-	-	0	0.785	1.0	1.0
1C0B	A	40	C	U	O	0	0	14	78.47	10	0	0	1	0	-	-	0	0.707	1.0	0.07
1C0B	A	41	K	U	O	0	0	58	58.44	10	0	0	1	0	-	-	0	0.426	1.0	0.29
1C0B	A	42	P	S	O	0	0	85	63.41	10	0	0	1	0	-	-	0	0.496	1.0	0.425
1C0B	A	43	V	E	B	0	1	68	49.71	0	1	0	0	0	-	-	0	0.303	0.0	0.34
1C0B	A	44	N	E	B	0	1	2	34.51	0	1	0	0	0	-	-	0	0.09	0.0	0.01
1C0B	A	45	T	E	B	0	1	13	38.3	0	1	0	0	0	-	-	0	0.143	0.0	0.065
1C0B	A	46	F	E	B	0	1	0	34.61	0	1	0	0	0	2776	A01.042	1	0.091	0.0	0.0
1C0B	A	47	V	E	B	1	1	0	31.63	0	1	0	0	0	-	-	0	0.05	0.0	0.0
1C0B	A	48	H	U	O	0	0	7	41.0	3	0	0	1	0	-	-	0	0.181	0.3	0.035
1C0B	A	49	E	S	O	0	0	38	69.34	3	0	0	1	0	-	-	0	0.579	0.3	0.19
1C0B	A	50	S	U	O	0	0	50	63.23	3	0	0	1	0	-	-	0	0.493	0.3	0.25
1C0B	A	51	L	H	H	0	0	86	54.58	0	0	1	0	0	-	-	0	0.372	0.0	0.43
1C0B	A	52	A	H	H	0	0	51	51.69	0	0	1	0	0	-	-	0	0.331	0.0	0.255
1C0B	A	53	D	H	H	0	0	79	52.5	0	0	1	0	0	-	-	0	0.342	0.0	0.395
1C0B	A	54	V	H	H	0	0	1	37.08	0	0	1	0	0	-	-	0	0.126	0.0	0.005
1C0B	A	55	Q	H	H	0	0	69	62.64	0	0	1	0	0	-	-	0	0.485	0.0	0.345
1C0B	A	56	A	H	H	0	0	41	41.55	0	0	1	0	0	-	-	0	0.189	0.0	0.205
1C0B	A	57	V	G	H	0	0	0	39.63	0	0	1	0	0	-	-	0	0.162	0.0	0.0
1C0B	A	58	C	G	H	0	0	4	39.62	0	0	1	0	0	-	-	0	0.162	0.0	0.02
1C0B	A	59	S	G	H	0	0	93	37.11	0	0	1	0	0	-	-	0	0.126	0.0	0.465
1C0B	A	60	Q	S	O	0	0	43	44.8	1	0	0	1	0	-	-	0	0.234	0.1	0.215
1C0B	A	61	K	E	B	1	0	86	49.79	0	1	0	0	0	-	-	0	0.304	0.0	0.43
1C0B	A	62	N	E	B	1	0	91	57.25	0	1	0	0	0	-	-	0	0.409	0.0	0.455
1C0B	A	63	V	E	B	1	0	40	52.19	0	1	0	0	0	-	-	0	0.338	0.0	0.2
1C0B	A	64	A	U	O	0	0	43	58.76	8	0	0	1	0	-	-	0	0.43	0.8	0.215
1C0B	A	65	C	U	O	0	0	15	70.4	8	0	0	1	0	-	-	0	0.594	0.8	0.075
1C0B	A	66	K	S	O	0	0	163	80.09	8	0	0	1	0	-	-	0	0.73	0.8	0.815
1C0B	A	67	N	S	O	0	0	116	85.74	8	0	0	1	0	-	-	0	0.809	0.8	0.58
1C0B	A	68	G	S	O	0	0	66	93.69	8	0	0	1	0	-	-	0	0.92	0.8	0.33
1C0B	A	69	Q	U	O	0	0	113	94.67	8	0	0	1	0	-	-	0	0.934	0.8	0.565
1C0B	A	70	T	S	O	0	0	67	99.36	8	0	0	1	0	-	-	0	1.0	0.8	0.335
1C0B	A	71	N	S	O	0	0	61	74.33	8	0	0	1	0	-	-	0	0.649	0.8	0.305
1C0B	A	72	C	E	B	1	1	0	56.8	0	1	0	0	0	-	-	0	0.403	0.0	0.0
1C0B	A	73	Y	E	B	1	1	46	43.67	0	1	0	0	0	2776	A01.042	1	0.218	0.0	0.23
1C0B	A	74	Q	E	B	1	1	35	46.61	0	1	0	0	0	-	-	0	0.26	0.0	0.175
1C0B	A	75	S	U	O	0	0	0	38.22	4	0	0	1	0	-	-	0	0.142	0.4	0.0
1C0B	A	76	Y	S	O	0	0	142	57.54	4	0	0	1	0	-	-	0	0.413	0.4	0.71
1C0B	A	77	S	S	O	0	0	85	71.02	4	0	0	1	0	-	-	0	0.602	0.4	0.425
1C0B	A	78	T	U	O	0	0	76	61.96	4	0	0	1	0	2776	A01.042	1	0.475	0.4	0.38
1C0B	A	79	M	E	B	0	1	22	57.95	0	1	0	0	0	-	-	0	0.419	0.0	0.11
1C0B	A	80	S	E	B	0	1	19	50.1	0	1	0	0	0	-	-	0	0.309	0.0	0.095
1C0B	A	81	I	E	B	1	1	0	41.37	0	1	0	0	0	-	-	0	0.186	0.0	0.0
1C0B	A	82	T	E	B	1	1	0	37.16	0	1	0	0	0	-	-	0	0.127	0.0	0.0
1C0B	A	83	D	E	B	1	1	26	55.28	0	1	0	0	0	-	-	0	0.381	0.0	0.13
1C0B	A	84	C	E	B	1	1	0	36.52	0	1	0	0	0	-	-	0	0.118	0.0	0.0
1C0B	A	85	R	E	B	1	1	108	70.68	0	1	0	0	0	-	-	0	0.598	0.0	0.54
1C0B	A	86	E	E	B	0	1	57	63.47	0	1	0	0	0	-	-	0	0.496	0.0	0.285
1C0B	A	87	T	U	O	0	0	51	70.19	10	0	0	1	0	-	-	0	0.591	1.0	0.255
1C0B	A	88	G	S	O	0	0	24	94.96	10	0	0	1	0	-	-	0	0.938	1.0	0.12
1C0B	A	89	S	U	O	0	0	117	96.64	10	0	0	1	0	-	-	0	0.962	1.0	0.585
1C0B	A	90	S	S	O	0	0	77	94.52	10	0	0	1	0	-	-	0	0.932	1.0	0.385
1C0B	A	91	K	S	O	0	0	198	87.35	10	0	0	1	0	2776	A01.042	1	0.831	1.0	0.99
1C0B	A	92	Y	S	O	0	0	195	95.85	10	0	0	1	0	-	-	0	0.951	1.0	0.975
1C0B	A	93	P	S	O	0	0	126	93.32	10	0	0	1	0	-	-	0	0.915	1.0	0.63
1C0B	A	94	N	U	O	0	0	69	91.48	10	0	0	1	0	-	-	0	0.889	1.0	0.345
1C0B	A	95	C	U	O	0	0	30	75.64	10	0	0	1	0	-	-	0	0.667	1.0	0.15
1C0B	A	96	A	U	O	0	0	36	42.83	10	0	0	1	0	2776	A01.042	1	0.207	1.0	0.18
1C0B	A	97	Y	E	B	1	0	3	38.79	0	1	0	0	0	-	-	0	0.15	0.0	0.015
1C0B	A	98	K	E	B	1	0	97	66.12	0	1	0	0	0	-	-	0	0.534	0.0	0.485
1C0B	A	99	T	E	B	1	0	27	48.96	0	1	0	0	0	-	-	0	0.293	0.0	0.135
1C0B	A	100	T	E	B	1	0	69	66.43	0	1	0	0	0	-	-	0	0.538	0.0	0.345
1C0B	A	101	Q	E	B	1	0	75	75.33	0	1	0	0	0	-	-	0	0.663	0.0	0.375
1C0B	A	102	A	E	B	1	0	15	57.66	0	1	0	0	0	-	-	0	0.415	0.0	0.075
1C0B	A	103	N	E	B	1	0	117	75.78	0	1	0	0	0	-	-	0	0.669	0.0	0.585
1C0B	A	104	K	E	B	1	0	44	63.22	0	1	0	0	0	-	-	0	0.493	0.0	0.22
1C0B	A	105	H	U	O	0	0	36	62.66	2	0	0	1	0	-	-	0	0.485	0.2	0.18
1C0B	A	106	I	U	O	0	0	0	38.02	2	0	0	1	0	-	-	0	0.139	0.2	0.0
1C0B	A	107	I	E	B	1	0	23	37.58	0	1	0	0	0	-	-	0	0.133	0.0	0.115
1C0B	A	108	V	E	B	1	1	0	36.73	0	1	0	0	0	-	-	0	0.121	0.0	0.0
1C0B	A	109	A	E	B	1	1	8	36.67	0	1	0	0	0	-	-	0	0.12	0.0	0.04
1C0B	A	110	C	E	B	0	1	3	50.58	0	1	0	0	0	-	-	0	0.315	0.0	0.015
1C0B	A	111	E	E	B	0	1	93	73.94	0	1	0	0	0	-	-	0	0.643	0.0	0.465
1C0B	A	112	G	T	O	0	0	32	85.04	4	0	0	1	0	-	-	0	0.799	0.4	0.16
1C0B	A	113	N	T	O	0	0	97	92.9	4	0	0	1	0	-	-	0	0.909	0.4	0.485
1C0B	A	114	P	T	O	0	0	101	90.63	4	0	0	1	1	-	-	0	0.877	0.4	0.505
1C0B	A	115	Y	T	O	0	0	151	88.19	4	0	0	1	1	-	-	0	0.843	0.4	0.755
1C0B	A	116	V	E	B	1	0	15	58.27	0	1	0	0	1	-	-	0	0.423	0.0	0.075
1C0B	A	117	P	E	B	1	0	6	41.67	0	1	0	0	1	-	-	0	0.19	0.0	0.03
1C0B	A	118	V	E	B	0	0	17	52.42	0	1	0	0	1	-	-	0	0.341	0.0	0.085
1C0B	A	119	H	E	B	1	0	55	54.8	0	1	0	0	1	-	-	0	0.375	0.0	0.275
1C0B	A	120	F	E	B	1	0	20	51.13	0	1	0	0	1	-	-	0	0.323	0.0	0.1
1C0B	A	121	D	U	O	0	0	15	78.55	4	0	0	1	1	-	-	0	0.708	0.4	0.075
1C0B	A	122	A	U	O	0	0	15	60.25	4	0	0	1	1	-	-	0	0.451	0.4	0.075
1C0B	A	123	S	U	O	0	0	26	81.38	4	0	0	1	1	-	-	0	0.748	0.4	0.13
1C0B	A	124	V	U	O	0	0	98	89.88	4	0	0	1	1	-	-	0	0.867	0.4	0.49
1C1Z	A	1	G	U	O	0	0	130	53.41	3	0	0	1	1	-	-	0	0.273	0.15	0.65
1C1Z	A	2	R	U	O	0	0	163	54.63	3	0	0	1	1	-	-	0	0.282	0.15	0.815
1C1Z	A	3	T	U	O	0	0	56	30.02	3	0	0	1	1	-	-	0	0.102	0.15	0.28
1C1Z	A	4	C	E	B	1	0	0	18.18	0	1	0	0	1	-	-	0	0.016	0.0	0.0
1C1Z	A	5	P	E	B	1	0	70	15.97	0	1	0	0	1	-	-	0	0.0	0.0	0.35
1C1Z	A	6	K	S	O	0	0	120	27.2	7	0	0	1	1	-	-	0	0.082	0.35	0.6
1C1Z	A	7	P	U	O	0	0	9	23.97	7	0	0	1	1	-	-	0	0.058	0.35	0.045
1C1Z	A	8	D	U	O	0	0	122	43.29	7	0	0	1	0	-	-	0	0.199	0.35	0.61
1C1Z	A	9	D	U	O	0	0	132	58.3	7	0	0	1	0	-	-	0	0.308	0.35	0.66
1C1Z	A	10	L	U	O	0	0	28	35.21	7	0	0	1	0	-	-	0	0.14	0.35	0.14
1C1Z	A	11	P	T	O	0	0	90	32.01	7	0	0	1	0	-	-	0	0.117	0.35	0.45
1C1Z	A	12	F	T	O	0	0	84	41.29	7	0	0	1	0	-	-	0	0.184	0.35	0.42
1C1Z	A	13	S	E	B	1	0	7	39.62	0	1	0	0	0	-	-	0	0.172	0.0	0.035
1C1Z	A	14	T	E	B	1	0	64	37.82	0	1	0	0	0	-	-	0	0.159	0.0	0.32
1C1Z	A	15	V	E	B	1	0	16	24.91	0	1	0	0	0	-	-	0	0.065	0.0	0.08
1C1Z	A	16	V	E	B	1	0	77	17.49	0	1	0	0	0	-	-	0	0.011	0.0	0.385
1C1Z	A	17	P	S	O	0	0	61	20.43	4	0	0	1	0	-	-	0	0.032	0.2	0.305
1C1Z	A	18	L	U	O	0	0	91	23.17	4	0	0	1	0	-	-	0	0.052	0.2	0.455
1C1Z	A	19	K	U	O	0	0	91	23.25	4	0	0	1	0	-	-	0	0.053	0.2	0.455
1C1Z	A	20	T	S	O	0	0	98	24.99	4	0	0	1	0	-	-	0	0.066	0.2	0.49
1C1Z	A	21	F	E	B	1	0	110	19.54	0	1	0	0	0	-	-	0	0.026	0.0	0.55
1C1Z	A	22	Y	E	B	1	0	0	22.65	0	1	0	0	0	-	-	0	0.049	0.0	0.0
1C1Z	A	23	E	U	O	0	0	90	31.35	4	0	0	1	0	-	-	0	0.112	0.2	0.45
1C1Z	A	24	P	T	O	0	0	41	22.02	4	0	0	1	0	-	-	0	0.044	0.2	0.205
1C1Z	A	25	G	T	O	0	0	51	23.78	4	0	0	1	0	-	-	0	0.057	0.2	0.255
1C1Z	A	26	E	U	O	0	0	54	25.69	4	0	0	1	0	-	-	0	0.071	0.2	0.27
1C1Z	A	27	E	E	B	0	1	84	36.51	0	1	0	0	0	-	-	0	0.15	0.0	0.42
1C1Z	A	28	I	E	B	0	1	1	21.06	0	1	0	0	0	-	-	0	0.037	0.0	0.005
1C1Z	A	29	T	E	B	1	1	23	22.42	0	1	0	0	0	-	-	0	0.047	0.0	0.115
1C1Z	A	30	Y	E	B	1	0	6	24.46	0	1	0	0	0	-	-	0	0.062	0.0	0.03
1C1Z	A	31	S	E	B	1	0	28	30.34	0	1	0	0	0	-	-	0	0.105	0.0	0.14
1C1Z	A	32	C	E	B	1	0	27	32.45	0	1	0	0	0	-	-	0	0.12	0.0	0.135
1C1Z	A	33	K	U	O	0	0	91	30.61	3	0	0	1	0	-	-	0	0.107	0.15	0.455
1C1Z	A	34	P	T	O	0	0	79	41.14	3	0	0	1	0	-	-	0	0.183	0.15	0.395
1C1Z	A	35	G	T	O	0	0	3	47.57	3	0	0	1	0	-	-	0	0.23	0.15	0.015
1C1Z	A	36	Y	E	B	1	0	42	35.6	0	1	0	0	0	-	-	0	0.143	0.0	0.21
1C1Z	A	37	V	E	B	1	0	59	55.64	0	1	0	0	0	-	-	0	0.289	0.0	0.295
1C1Z	A	38	S	E	B	1	0	29	74.5	0	1	0	0	0	-	-	0	0.426	0.0	0.145
1C1Z	A	39	R	S	O	0	0	200	113.01	5	0	0	1	0	-	-	0	0.707	0.25	1.0
1C1Z	A	40	G	S	O	0	0	53	91.39	5	0	0	1	0	-	-	0	0.549	0.25	0.265
1C1Z	A	41	G	S	O	0	0	55	90.72	5	0	0	1	0	-	-	0	0.544	0.25	0.275
1C1Z	A	42	M	U	O	0	0	103	76.07	5	0	0	1	0	-	-	0	0.438	0.25	0.515
1C1Z	A	43	R	U	O	0	0	44	60.75	5	0	0	1	0	-	-	0	0.326	0.25	0.22
1C1Z	A	44	K	E	B	1	0	112	42.78	0	1	0	0	0	-	-	0	0.195	0.0	0.56
1C1Z	A	45	F	E	B	1	0	29	28.37	0	1	0	0	0	-	-	0	0.09	0.0	0.145
1C1Z	A	46	I	E	B	1	0	93	27.44	0	1	0	0	0	-	-	0	0.084	0.0	0.465
1C1Z	A	47	C	U	O	0	0	2	23.13	13	0	0	1	0	-	-	0	0.052	0.65	0.01
1C1Z	A	48	P	U	O	0	0	34	23.47	13	0	0	1	0	-	-	0	0.055	0.65	0.17
1C1Z	A	49	L	T	O	0	0	141	18.78	13	0	0	1	0	-	-	0	0.02	0.65	0.705
1C1Z	A	50	T	T	O	0	0	68	26.98	13	0	0	1	0	-	-	0	0.08	0.65	0.34
1C1Z	A	51	G	S	O	0	0	7	31.08	13	0	0	1	0	-	-	0	0.11	0.65	0.035
1C1Z	A	52	L	U	O	0	0	115	27.74	13	0	0	1	0	-	-	0	0.086	0.65	0.575
1C1Z	A	53	W	U	O	0	0	42	32.18	13	0	0	1	0	-	-	0	0.118	0.65	0.21
1C1Z	A	54	P	U	O	0	0	61	38.4	13	0	0	1	0	-	-	0	0.163	0.65	0.305
1C1Z	A	55	I	U	O	0	0	148	67.69	13	0	0	1	0	-	-	0	0.377	0.65	0.74
1C1Z	A	56	N	U	O	0	0	41	58.66	13	0	0	1	0	-	-	0	0.311	0.65	0.205
1C1Z	A	57	T	U	O	0	0	77	56.82	13	0	0	1	0	-	-	0	0.297	0.65	0.385
1C1Z	A	58	L	U	O	0	0	12	35.26	13	0	0	1	0	-	-	0	0.14	0.65	0.06
1C1Z	A	59	K	U	O	0	0	138	68.78	13	0	0	1	0	-	-	0	0.385	0.65	0.69
1C1Z	A	60	C	E	B	1	0	11	44.44	0	1	0	0	0	-	-	0	0.207	0.0	0.055
1C1Z	A	61	T	E	B	1	0	78	54.81	0	1	0	0	0	-	-	0	0.283	0.0	0.39
1C1Z	A	62	P	E	B	1	0	25	48.19	0	1	0	0	0	-	-	0	0.235	0.0	0.125
1C1Z	A	63	R	U	O	0	0	103	56.87	11	0	0	1	0	-	-	0	0.298	0.55	0.515
1C1Z	A	64	V	U	O	0	0	97	46.43	11	0	0	1	0	-	-	0	0.222	0.55	0.485
1C1Z	A	65	C	U	O	0	0	6	32.64	11	0	0	1	0	-	-	0	0.121	0.55	0.03
1C1Z	A	66	P	U	O	0	0	81	32.0	11	0	0	1	0	-	-	0	0.117	0.55	0.405
1C1Z	A	67	F	U	O	0	0	138	31.19	11	0	0	1	0	-	-	0	0.111	0.55	0.69
1C1Z	A	68	A	U	O	0	0	5	26.7	11	0	0	1	0	-	-	0	0.078	0.55	0.025
1C1Z	A	69	G	U	O	0	0	16	33.0	11	0	0	1	0	-	-	0	0.124	0.55	0.08
1C1Z	A	70	I	U	O	0	0	136	27.08	11	0	0	1	0	-	-	0	0.081	0.55	0.68
1C1Z	A	71	L	B	O	1	0	18	17.8	11	0	0	1	0	-	-	0	0.013	0.55	0.09
1C1Z	A	72	E	T	O	0	0	164	34.77	11	0	0	1	0	-	-	0	0.137	0.55	0.82
1C1Z	A	73	N	T	O	0	0	78	19.99	11	0	0	1	0	-	-	0	0.029	0.55	0.39
1C1Z	A	74	G	E	B	1	1	21	19.96	0	1	0	0	0	-	-	0	0.029	0.0	0.105
1C1Z	A	75	A	E	B	0	1	46	31.07	0	1	0	0	0	-	-	0	0.11	0.0	0.23
1C1Z	A	76	V	E	B	0	1	21	33.82	0	1	0	0	0	-	-	0	0.13	0.0	0.105
1C1Z	A	77	R	E	B	0	1	200	66.94	0	1	0	0	0	-	-	0	0.371	0.0	1.0
1C1Z	A	78	Y	U	O	0	0	115	35.12	8	0	0	1	0	-	-	0	0.139	0.4	0.575
1C1Z	A	79	T	S	O	0	0	108	32.74	8	0	0	1	0	-	-	0	0.122	0.4	0.54
1C1Z	A	80	T	U	O	0	0	56	37.08	8	0	0	1	0	-	-	0	0.154	0.4	0.28
1C1Z	A	81	F	S	O	0	0	26	39.46	8	0	0	1	0	-	-	0	0.171	0.4	0.13
1C1Z	A	82	E	S	O	0	0	59	49.65	8	0	0	1	0	-	-	0	0.245	0.4	0.295
1C1Z	A	83	Y	T	O	0	0	49	42.66	8	0	0	1	0	-	-	0	0.194	0.4	0.245
1C1Z	A	84	P	T	O	0	0	65	34.69	8	0	0	1	0	-	-	0	0.136	0.4	0.325
1C1Z	A	85	N	U	O	0	0	45	50.11	8	0	0	1	0	-	-	0	0.249	0.4	0.225
1C1Z	A	86	T	E	B	0	1	72	43.33	0	1	0	0	0	-	-	0	0.199	0.0	0.36
1C1Z	A	87	I	E	B	0	1	0	25.19	0	1	0	0	0	-	-	0	0.067	0.0	0.0
1C1Z	A	88	S	E	B	1	1	39	33.04	0	1	0	0	0	-	-	0	0.124	0.0	0.195
1C1Z	A	89	F	E	B	1	0	15	31.77	0	1	0	0	0	-	-	0	0.115	0.0	0.075
1C1Z	A	90	S	E	B	1	0	60	38.74	0	1	0	0	0	-	-	0	0.166	0.0	0.3
1C1Z	A	91	C	E	B	1	0	30	39.92	0	1	0	0	0	-	-	0	0.174	0.0	0.15
1C1Z	A	92	N	U	O	0	0	81	43.73	3	0	0	1	0	-	-	0	0.202	0.15	0.405
1C1Z	A	93	T	T	O	0	0	109	47.06	3	0	0	1	0	-	-	0	0.226	0.15	0.545
1C1Z	A	94	G	T	O	0	0	21	50.02	3	0	0	1	0	-	-	0	0.248	0.15	0.105
1C1Z	A	95	F	E	B	1	0	54	33.8	0	1	0	0	0	-	-	0	0.13	0.0	0.27
1C1Z	A	96	Y	E	B	1	0	112	30.85	0	1	0	0	0	-	-	0	0.108	0.0	0.56
1C1Z	A	97	L	E	B	1	0	43	30.24	0	1	0	0	0	-	-	0	0.104	0.0	0.215
1C1Z	A	98	N	E	B	1	0	93	30.08	0	1	0	0	0	-	-	0	0.103	0.0	0.465
1C1Z	A	99	G	S	O	0	0	41	20.32	3	0	0	1	0	-	-	0	0.032	0.15	0.205
1C1Z	A	100	A	U	O	0	0	35	19.12	3	0	0	1	0	-	-	0	0.023	0.15	0.175
1C1Z	A	101	D	S	O	0	0	111	43.64	3	0	0	1	0	-	-	0	0.202	0.15	0.555
1C1Z	A	102	S	E	B	1	0	35	34.52	0	1	0	0	0	-	-	0	0.135	0.0	0.175
1C1Z	A	103	A	E	B	1	0	1	30.53	0	1	0	0	0	-	-	0	0.106	0.0	0.005
1C1Z	A	104	K	E	B	1	1	116	48.2	0	1	0	0	0	-	-	0	0.235	0.0	0.58
1C1Z	A	105	C	E	B	0	1	1	39.82	0	1	0	0	0	-	-	0	0.174	0.0	0.005
1C1Z	A	106	T	U	O	0	0	34	43.76	5	0	0	1	0	-	-	0	0.202	0.25	0.17
1C1Z	A	107	E	T	O	0	0	105	52.27	5	0	0	1	0	-	-	0	0.264	0.25	0.525
1C1Z	A	108	E	T	O	0	0	121	56.96	5	0	0	1	0	-	-	0	0.298	0.25	0.605
1C1Z	A	109	G	S	O	0	0	19	43.64	5	0	0	1	0	-	-	0	0.202	0.25	0.095
1C1Z	A	110	K	S	O	0	0	113	65.09	5	0	0	1	0	-	-	0	0.358	0.25	0.565
1C1Z	A	111	W	E	B	1	0	26	26.18	0	1	0	0	0	-	-	0	0.074	0.0	0.13
1C1Z	A	112	S	E	B	1	0	64	32.06	0	1	0	0	0	-	-	0	0.117	0.0	0.32
1C1Z	A	113	P	S	O	0	0	67	25.48	4	0	0	1	0	-	-	0	0.069	0.2	0.335
1C1Z	A	114	E	U	O	0	0	172	55.55	4	0	0	1	0	-	-	0	0.288	0.2	0.86
1C1Z	A	115	L	U	O	0	0	70	23.08	4	0	0	1	0	-	-	0	0.052	0.2	0.35
1C1Z	A	116	P	U	O	0	0	12	20.24	4	0	0	1	0	-	-	0	0.031	0.2	0.06
[truncated: 67,286 more rows]

## Sheet: AlphaFoldSet (CutDB, PDB+Afold)
structure	chain	AA	num_AA	is_cut	MEROPS_CODE	SUBSTRATE_name	init_SS_type	bp1	bp2	ACC	AF_score	len_loop	is_terminus	ACC_N_chain	AF_score_N_chain	len_loop_N_chain	SS_B	SS_H	SS_O	SS_type	ACC_N_com
AF-P02461-F1	A	M	1	0	-	2397	U	0	0	116	35.98	4	1	0.58	0.112	0.2	0	0	1	O	0.58
AF-P02461-F1	A	M	2	0	-	2397	U	0	0	130	37.23	4	1	0.65	0.13	0.2	0	0	1	O	0.65
AF-P02461-F1	A	S	3	0	-	2397	S	0	0	33	45.35	4	1	0.165	0.245	0.2	0	0	1	O	0.165
AF-P02461-F1	A	F	4	0	-	2397	S	0	0	185	48.52	4	1	0.925	0.289	0.2	0	0	1	O	0.925
AF-P02461-F1	A	V	5	0	-	2397	H	0	0	120	54.67	0	1	0.6	0.376	0	0	1	0	H	0.6
AF-P02461-F1	A	Q	6	0	-	2397	H	0	0	133	49.36	0	1	0.665	0.301	0	0	1	0	H	0.665
AF-P02461-F1	A	K	7	0	-	2397	H	0	0	131	49.07	0	1	0.655	0.297	0	0	1	0	H	0.655
AF-P02461-F1	A	G	8	0	-	2397	H	0	0	32	51.46	0	1	0.16	0.331	0	0	1	0	H	0.16
AF-P02461-F1	A	S	9	0	-	2397	H	0	0	65	54.39	0	1	0.325	0.373	0	0	1	0	H	0.325
AF-P02461-F1	A	W	10	0	-	2397	H	0	0	183	50.86	0	1	0.915	0.323	0	0	1	0	H	0.915
AF-P02461-F1	A	L	11	0	-	2397	H	0	0	110	52.48	0	1	0.55	0.345	0	0	1	0	H	0.55
AF-P02461-F1	A	L	12	0	-	2397	H	0	0	114	52.64	0	1	0.57	0.348	0	0	1	0	H	0.57
AF-P02461-F1	A	L	13	0	-	2397	H	0	0	85	55.08	0	1	0.425	0.382	0	0	1	0	H	0.425
AF-P02461-F1	A	A	14	0	-	2397	H	0	0	59	58.05	0	1	0.295	0.424	0	0	1	0	H	0.295
AF-P02461-F1	A	L	15	0	-	2397	H	0	0	109	55.11	0	1	0.545	0.383	0	0	1	0	H	0.545
AF-P02461-F1	A	L	16	0	-	2397	H	0	0	79	50.87	0	1	0.395	0.323	0	0	1	0	H	0.395
AF-P02461-F1	A	H	17	0	-	2397	H	0	0	108	46.66	0	1	0.54	0.263	0	0	1	0	H	0.54
AF-P02461-F1	A	P	18	0	-	2397	H	0	0	62	48.53	0	1	0.31	0.29	0	0	1	0	H	0.31
AF-P02461-F1	A	T	19	0	-	2397	H	0	0	79	47.69	0	1	0.395	0.278	0	0	1	0	H	0.395
AF-P02461-F1	A	I	20	0	-	2397	H	0	0	86	46.84	0	1	0.43	0.266	0	0	1	0	H	0.43
AF-P02461-F1	A	I	21	0	-	2397	H	0	0	96	44.89	0	1	0.48	0.238	0	0	1	0	H	0.48
AF-P02461-F1	A	L	22	0	-	2397	H	0	0	115	42.24	0	1	0.575	0.2	0	0	1	0	H	0.575
AF-P02461-F1	A	A	23	0	-	2397	T	0	0	70	44.09	9	1	0.35	0.227	0.45	0	0	1	O	0.35
AF-P02461-F1	A	Q	24	0	-	2397	T	0	0	165	37.11	9	1	0.825	0.128	0.45	0	0	1	O	0.825
AF-P02461-F1	A	Q	25	0	-	2397	U	0	0	130	37.72	9	0	0.65	0.136	0.45	0	0	1	O	0.65
AF-P02461-F1	A	E	26	0	-	2397	U	0	0	168	42.44	9	0	0.84	0.203	0.45	0	0	1	O	0.84
AF-P02461-F1	A	A	27	0	-	2397	U	0	0	71	44.77	9	0	0.355	0.236	0.45	0	0	1	O	0.355
AF-P02461-F1	A	V	28	0	-	2397	U	0	0	82	49.41	9	0	0.41	0.302	0.45	0	0	1	O	0.41
AF-P02461-F1	A	E	29	0	-	2397	T	0	0	200	52.97	9	0	1	0.352	0.45	0	0	1	O	1
AF-P02461-F1	A	G	30	0	-	2397	T	0	0	14	63.2	9	0	0.07	0.497	0.45	0	0	1	O	0.07
AF-P02461-F1	A	G	31	0	-	2397	U	0	0	28	73.55	9	0	0.14	0.644	0.45	0	0	1	O	0.14
AF-P02461-F1	A	C	32	0	-	2397	E	1	0	7	89.06	0	0	0.035	0.863	0	1	0	0	B	0.035
AF-P02461-F1	A	S	33	0	-	2397	E	1	0	82	89.39	0	0	0.41	0.868	0	1	0	0	B	0.41
AF-P02461-F1	A	H	34	0	-	2397	E	1	0	38	86.72	0	0	0.19	0.83	0	1	0	0	B	0.19
AF-P02461-F1	A	L	35	0	-	2397	T	0	0	145	86.15	2	0	0.725	0.822	0.1	0	0	1	O	0.725
AF-P02461-F1	A	G	36	0	-	2397	T	0	0	76	84.14	2	0	0.38	0.794	0.1	0	0	1	O	0.38
AF-P02461-F1	A	Q	37	0	-	2397	E	1	0	123	85.09	0	0	0.615	0.807	0	1	0	0	B	0.615
AF-P02461-F1	A	S	38	0	-	2397	E	1	0	105	89.14	0	0	0.525	0.865	0	1	0	0	B	0.525
AF-P02461-F1	A	Y	39	0	-	2397	E	1	0	38	89.83	0	0	0.19	0.874	0	1	0	0	B	0.19
AF-P02461-F1	A	A	40	0	-	2397	U	0	0	43	88.9	4	0	0.215	0.861	0.2	0	0	1	O	0.215
AF-P02461-F1	A	D	41	0	-	2397	T	0	0	57	87.39	4	0	0.285	0.84	0.2	0	0	1	O	0.285
AF-P02461-F1	A	R	42	0	-	2397	T	0	0	188	87.94	4	0	0.94	0.848	0.2	0	0	1	O	0.94
AF-P02461-F1	A	D	43	0	-	2397	U	0	0	74	87.51	4	0	0.37	0.841	0.2	0	0	1	O	0.37
AF-P02461-F1	A	V	44	0	-	2397	E	1	0	68	90.84	0	0	0.34	0.889	0	1	0	0	B	0.34
AF-P02461-F1	A	W	45	0	-	2397	E	1	0	25	92.28	0	0	0.125	0.909	0	1	0	0	B	0.125
AF-P02461-F1	A	K	46	0	-	2397	U	0	0	76	89.11	5	0	0.38	0.864	0.25	0	0	1	O	0.38
AF-P02461-F1	A	P	47	0	-	2397	S	0	0	39	86.72	5	0	0.195	0.83	0.25	0	0	1	O	0.195
AF-P02461-F1	A	E	48	0	-	2397	S	0	0	126	87.72	5	0	0.63	0.844	0.25	0	0	1	O	0.63
AF-P02461-F1	A	P	49	0	-	2397	T	0	0	59	83.99	5	0	0.295	0.792	0.25	0	0	1	O	0.295
AF-P02461-F1	A	C	50	0	-	2397	T	0	0	55	87.93	5	0	0.275	0.847	0.25	0	0	1	O	0.275
AF-P02461-F1	A	Q	51	0	-	2397	E	0	1	47	89.74	0	0	0.235	0.873	0	1	0	0	B	0.235
AF-P02461-F1	A	I	52	0	-	2397	E	0	1	66	91.97	0	0	0.33	0.905	0	1	0	0	B	0.33
AF-P02461-F1	A	C	53	0	-	2397	E	1	1	0	93.31	0	0	0	0.924	0	1	0	0	B	0
AF-P02461-F1	A	V	54	0	-	2397	E	1	1	47	94.27	0	0	0.235	0.937	0	1	0	0	B	0.235
AF-P02461-F1	A	C	55	0	-	2397	E	0	1	0	92.45	0	0	0	0.911	0	1	0	0	B	0
AF-P02461-F1	A	D	56	0	-	2397	E	0	1	72	90.73	0	0	0.36	0.887	0	1	0	0	B	0.36
AF-P02461-F1	A	S	57	0	-	2397	T	0	0	85	85.89	2	0	0.425	0.818	0.1	0	0	1	O	0.425
AF-P02461-F1	A	G	58	0	-	2397	T	0	0	39	82.62	2	0	0.195	0.772	0.1	0	0	1	O	0.195
AF-P02461-F1	A	S	59	0	-	2397	E	1	0	72	85.36	0	0	0.36	0.811	0	1	0	0	B	0.36
AF-P02461-F1	A	V	60	0	-	2397	E	1	0	48	92.07	0	0	0.24	0.906	0	1	0	0	B	0.24
AF-P02461-F1	A	L	61	0	-	2397	E	1	0	100	91.56	0	0	0.5	0.899	0	1	0	0	B	0.5
AF-P02461-F1	A	C	62	0	-	2397	E	1	0	50	91.62	0	0	0.25	0.9	0	1	0	0	B	0.25
AF-P02461-F1	A	D	63	0	-	2397	E	1	0	89	90.55	0	0	0.445	0.884	0	1	0	0	B	0.445
AF-P02461-F1	A	D	64	0	-	2397	E	1	0	109	88.19	0	0	0.545	0.851	0	1	0	0	B	0.545
AF-P02461-F1	A	I	65	0	-	2397	U	0	0	47	80.58	20	0	0.235	0.743	1	0	0	1	O	0.235
AF-P02461-F1	A	I	66	0	-	2397	U	0	0	148	79.38	20	0	0.74	0.726	1	0	0	1	O	0.74
AF-P02461-F1	A	C	67	0	-	2397	U	0	0	41	80.63	20	0	0.205	0.744	1	0	0	1	O	0.205
AF-P02461-F1	A	D	68	0	-	2397	U	0	0	131	69.16	20	0	0.655	0.582	1	0	0	1	O	0.655
AF-P02461-F1	A	D	69	0	-	2397	U	0	0	173	62.88	20	0	0.865	0.493	1	0	0	1	O	0.865
AF-P02461-F1	A	Q	70	0	-	2397	S	0	0	167	60.07	20	0	0.835	0.453	1	0	0	1	O	0.835
AF-P02461-F1	A	E	71	0	-	2397	U	0	0	195	59.95	20	0	0.975	0.451	1	0	0	1	O	0.975
AF-P02461-F1	A	L	72	0	-	2397	U	0	0	83	68.83	20	0	0.415	0.577	1	0	0	1	O	0.415
AF-P02461-F1	A	D	73	0	-	2397	U	0	0	171	71.05	20	0	0.855	0.608	1	0	0	1	O	0.855
AF-P02461-F1	A	C	74	0	-	2397	S	0	0	30	80.89	20	0	0.15	0.748	1	0	0	1	O	0.15
AF-P02461-F1	A	P	75	0	-	2397	S	0	0	143	72.76	20	0	0.715	0.633	1	0	0	1	O	0.715
AF-P02461-F1	A	N	76	0	-	2397	S	0	0	100	77	20	0	0.5	0.693	1	0	0	1	O	0.5
AF-P02461-F1	A	P	77	0	-	2397	U	0	0	59	78.88	20	0	0.295	0.719	1	0	0	1	O	0.295
AF-P02461-F1	A	E	78	0	-	2397	B	1	0	110	82.24	20	0	0.55	0.767	1	0	0	1	O	0.55
AF-P02461-F1	A	I	79	0	-	2397	U	0	0	108	82.56	20	0	0.54	0.771	1	0	0	1	O	0.54
AF-P02461-F1	A	P	80	0	-	2397	U	0	0	57	78.43	20	0	0.285	0.713	1	0	0	1	O	0.285
AF-P02461-F1	A	F	81	0	-	2397	T	0	0	200	77.3	20	0	1	0.697	1	0	0	1	O	1
AF-P02461-F1	A	G	82	0	-	2397	T	0	0	40	75.66	20	0	0.2	0.674	1	0	0	1	O	0.2
AF-P02461-F1	A	E	83	0	-	2397	U	0	0	104	83.26	20	0	0.52	0.781	1	0	0	1	O	0.52
AF-P02461-F1	A	C	84	0	-	2397	S	0	0	16	85.56	20	0	0.08	0.814	1	0	0	1	O	0.08
AF-P02461-F1	A	C	85	0	-	2397	S	0	0	40	87.14	20	0	0.2	0.836	1	0	0	1	O	0.2
AF-P02461-F1	A	A	86	0	-	2397	U	0	0	32	83.06	20	0	0.16	0.778	1	0	0	1	O	0.16
AF-P02461-F1	A	V	87	0	-	2397	B	1	0	75	84.33	20	0	0.375	0.796	1	0	0	1	O	0.375
AF-P02461-F1	A	C	88	0	-	2397	U	0	0	55	83.3	20	0	0.275	0.782	1	0	0	1	O	0.275
AF-P02461-F1	A	P	89	0	-	2397	U	0	0	65	69.43	20	0	0.325	0.585	1	0	0	1	O	0.325
AF-P02461-F1	A	Q	90	0	-	2397	U	0	0	177	55.4	20	0	0.885	0.387	1	0	0	1	O	0.885
AF-P02461-F1	A	P	91	0	-	2397	U	0	0	114	46.42	20	0	0.57	0.26	1	0	0	1	O	0.57
AF-P02461-F1	A	P	92	0	-	2397	U	0	0	123	40.9	20	0	0.615	0.182	1	0	0	1	O	0.615
AF-P02461-F1	A	T	93	0	-	2397	U	0	0	141	35.21	20	0	0.705	0.101	1	0	0	1	O	0.705
AF-P02461-F1	A	A	94	0	-	2397	U	0	0	82	32.28	20	0	0.41	0.059	1	0	0	1	O	0.41
AF-P02461-F1	A	P	95	0	-	2397	U	0	0	123	34.14	20	0	0.615	0.086	1	0	0	1	O	0.615
AF-P02461-F1	A	T	96	0	-	2397	U	0	0	145	35.65	20	0	0.725	0.107	1	0	0	1	O	0.725
AF-P02461-F1	A	R	97	0	-	2397	U	0	0	200	34.28	20	0	1	0.088	1	0	0	1	O	1
AF-P02461-F1	A	P	98	0	-	2397	U	0	0	108	54.91	20	0	0.54	0.38	1	0	0	1	O	0.54
AF-P02461-F1	A	P	99	0	-	2397	U	0	0	123	42.98	20	0	0.615	0.211	1	0	0	1	O	0.615
AF-P02461-F1	A	N	100	0	-	2397	U	0	0	167	40	20	0	0.835	0.169	1	0	0	1	O	0.835
AF-P02461-F1	A	G	101	0	-	2397	S	0	0	68	39.05	20	0	0.34	0.155	1	0	0	1	O	0.34
AF-P02461-F1	A	Q	102	0	-	2397	U	0	0	200	33.86	20	0	1	0.082	1	0	0	1	O	1
AF-P02461-F1	A	G	103	0	-	2397	U	0	0	68	38.6	20	0	0.34	0.149	1	0	0	1	O	0.34
AF-P02461-F1	A	P	104	0	-	2397	U	0	0	126	37.7	20	0	0.63	0.136	1	0	0	1	O	0.63
AF-P02461-F1	A	Q	105	0	-	2397	U	0	0	200	37.94	20	0	1	0.14	1	0	0	1	O	1
AF-P02461-F1	A	G	106	0	-	2397	U	0	0	53	45.37	20	0	0.265	0.245	1	0	0	1	O	0.265
AF-P02461-F1	A	P	107	0	-	2397	U	0	0	132	44.88	20	0	0.66	0.238	1	0	0	1	O	0.66
AF-P02461-F1	A	K	108	1	M10.004|M10.013	2397	U	0	0	200	44.38	20	0	1	0.231	1	0	0	1	O	1
AF-P02461-F1	A	G	109	0	-	2397	U	0	0	61	46.92	20	0	0.305	0.267	1	0	0	1	O	0.305
AF-P02461-F1	A	D	110	0	-	2397	U	0	0	153	45.82	20	0	0.765	0.251	1	0	0	1	O	0.765
AF-P02461-F1	A	P	111	0	-	2397	U	0	0	126	56.1	20	0	0.63	0.397	1	0	0	1	O	0.63
AF-P02461-F1	A	G	112	0	-	2397	U	0	0	64	54.13	20	0	0.32	0.369	1	0	0	1	O	0.32
AF-P02461-F1	A	P	113	0	-	2397	U	0	0	122	48.37	20	0	0.61	0.287	1	0	0	1	O	0.61
AF-P02461-F1	A	P	114	0	-	2397	U	0	0	127	63.17	20	0	0.635	0.497	1	0	0	1	O	0.635
AF-P02461-F1	A	G	115	0	-	2397	U	0	0	69	56.06	20	0	0.345	0.396	1	0	0	1	O	0.345
AF-P02461-F1	A	I	116	0	-	2397	U	0	0	164	52.85	20	0	0.82	0.351	1	0	0	1	O	0.82
AF-P02461-F1	A	P	117	0	-	2397	U	0	0	114	61.73	20	0	0.57	0.476	1	0	0	1	O	0.57
AF-P02461-F1	A	G	118	0	-	2397	U	0	0	69	53.9	20	0	0.345	0.366	1	0	0	1	O	0.345
AF-P02461-F1	A	R	119	0	-	2397	U	0	0	200	52.56	20	0	1	0.347	1	0	0	1	O	1
AF-P02461-F1	A	N	120	0	-	2397	U	0	0	147	55.63	20	0	0.735	0.39	1	0	0	1	O	0.735
AF-P02461-F1	A	G	121	0	-	2397	U	0	0	71	53.47	20	0	0.355	0.359	1	0	0	1	O	0.355
AF-P02461-F1	A	D	122	0	-	2397	U	0	0	114	52.8	20	0	0.57	0.35	1	0	0	1	O	0.57
AF-P02461-F1	A	P	123	0	-	2397	U	0	0	117	56.49	20	0	0.585	0.402	1	0	0	1	O	0.585
AF-P02461-F1	A	G	124	0	-	2397	U	0	0	72	54.49	20	0	0.36	0.374	1	0	0	1	O	0.36
AF-P02461-F1	A	I	125	0	-	2397	U	0	0	163	57.14	20	0	0.815	0.411	1	0	0	1	O	0.815
AF-P02461-F1	A	P	126	0	-	2397	U	0	0	112	54.16	20	0	0.56	0.369	1	0	0	1	O	0.56
AF-P02461-F1	A	G	127	0	-	2397	U	0	0	72	51.95	20	0	0.36	0.338	1	0	0	1	O	0.36
AF-P02461-F1	A	Q	128	0	-	2397	U	0	0	187	53.41	20	0	0.935	0.359	1	0	0	1	O	0.935
AF-P02461-F1	A	P	129	0	-	2397	U	0	0	118	52.53	20	0	0.59	0.346	1	0	0	1	O	0.59
AF-P02461-F1	A	G	130	1	M10.004|M10.013	2397	U	0	0	70	48.63	20	0	0.35	0.291	1	0	0	1	O	0.35
AF-P02461-F1	A	S	131	0	-	2397	U	0	0	115	47.73	20	0	0.575	0.278	1	0	0	1	O	0.575
AF-P02461-F1	A	P	132	0	-	2397	U	0	0	127	53.37	20	0	0.635	0.358	1	0	0	1	O	0.635
AF-P02461-F1	A	G	133	0	-	2397	U	0	0	70	45.52	20	0	0.35	0.247	1	0	0	1	O	0.35
AF-P02461-F1	A	S	134	0	-	2397	U	0	0	113	45.08	20	0	0.565	0.241	1	0	0	1	O	0.565
AF-P02461-F1	A	P	135	0	-	2397	U	0	0	130	49.81	20	0	0.65	0.308	1	0	0	1	O	0.65
AF-P02461-F1	A	G	136	0	-	2397	U	0	0	60	43.55	20	0	0.3	0.219	1	0	0	1	O	0.3
AF-P02461-F1	A	P	137	0	-	2397	U	0	0	129	41.1	20	0	0.645	0.184	1	0	0	1	O	0.645
AF-P02461-F1	A	P	138	0	-	2397	U	0	0	131	47.12	20	0	0.655	0.27	1	0	0	1	O	0.655
AF-P02461-F1	A	G	139	0	-	2397	U	0	0	72	36.1	20	0	0.36	0.114	1	0	0	1	O	0.36
AF-P02461-F1	A	I	140	0	-	2397	U	0	0	165	35.42	20	0	0.825	0.104	1	0	0	1	O	0.825
AF-P02461-F1	A	C	141	0	-	2397	U	0	0	120	35.06	20	0	0.6	0.099	1	0	0	1	O	0.6
AF-P02461-F1	A	E	142	0	-	2397	U	0	0	180	36.19	20	0	0.9	0.115	1	0	0	1	O	0.9
AF-P02461-F1	A	S	143	0	-	2397	U	0	0	101	39.41	20	0	0.505	0.16	1	0	0	1	O	0.505
AF-P02461-F1	A	C	144	0	-	2397	U	0	0	120	32.87	20	0	0.6	0.068	1	0	0	1	O	0.6
AF-P02461-F1	A	P	145	0	-	2397	U	0	0	108	40.87	20	0	0.54	0.181	1	0	0	1	O	0.54
AF-P02461-F1	A	T	146	0	-	2397	U	0	0	148	38.08	20	0	0.74	0.142	1	0	0	1	O	0.74
AF-P02461-F1	A	G	147	0	-	2397	U	0	0	64	37.15	20	0	0.32	0.128	1	0	0	1	O	0.32
AF-P02461-F1	A	P	148	0	-	2397	U	0	0	72	40.54	20	0	0.36	0.176	1	0	0	1	O	0.36
AF-P02461-F1	A	Q	149	0	-	2397	U	0	0	100	34.32	20	0	0.5	0.088	1	0	0	1	O	0.5
AF-P02461-F1	A	N	150	0	-	2397	U	0	0	128	29.59	20	0	0.64	0.021	1	0	0	1	O	0.64
AF-P02461-F1	A	Y	151	0	-	2397	U	0	0	200	34.59	20	0	1	0.092	1	0	0	1	O	1
AF-P02461-F1	A	S	152	0	-	2397	U	0	0	102	29.44	20	0	0.51	0.019	1	0	0	1	O	0.51
AF-P02461-F1	A	P	153	0	-	2397	U	0	0	117	35.51	20	0	0.585	0.105	1	0	0	1	O	0.585
AF-P02461-F1	A	Q	154	0	-	2397	U	0	0	150	28.62	20	0	0.75	0.008	1	0	0	1	O	0.75
AF-P02461-F1	A	Y	155	0	-	2397	U	0	0	200	35.47	20	0	1	0.105	1	0	0	1	O	1
AF-P02461-F1	A	D	156	0	-	2397	U	0	0	138	29.22	20	0	0.69	0.016	1	0	0	1	O	0.69
AF-P02461-F1	A	S	157	0	-	2397	U	0	0	100	35.34	20	0	0.5	0.103	1	0	0	1	O	0.5
AF-P02461-F1	A	Y	158	0	-	2397	U	0	0	200	35.35	20	0	1	0.103	1	0	0	1	O	1
AF-P02461-F1	A	D	159	0	-	2397	U	0	0	152	36.67	20	0	0.76	0.122	1	0	0	1	O	0.76
AF-P02461-F1	A	V	160	0	-	2397	U	0	0	139	38.12	20	0	0.695	0.142	1	0	0	1	O	0.695
AF-P02461-F1	A	K	161	0	-	2397	U	0	0	189	32.44	20	0	0.945	0.062	1	0	0	1	O	0.945
AF-P02461-F1	A	S	162	0	-	2397	U	0	0	125	38.22	20	0	0.625	0.144	1	0	0	1	O	0.625
AF-P02461-F1	A	G	163	0	-	2397	U	0	0	71	35.74	20	0	0.355	0.108	1	0	0	1	O	0.355
AF-P02461-F1	A	V	164	0	-	2397	U	0	0	137	35.49	20	0	0.685	0.105	1	0	0	1	O	0.685
AF-P02461-F1	A	A	165	0	-	2397	U	0	0	88	34.07	20	0	0.44	0.085	1	0	0	1	O	0.44
AF-P02461-F1	A	V	166	0	-	2397	U	0	0	143	36.62	20	0	0.715	0.121	1	0	0	1	O	0.715
AF-P02461-F1	A	G	167	0	-	2397	U	0	0	75	37.39	20	0	0.375	0.132	1	0	0	1	O	0.375
AF-P02461-F1	A	G	168	0	-	2397	U	0	0	72	36.15	20	0	0.36	0.114	1	0	0	1	O	0.36
AF-P02461-F1	A	L	169	0	-	2397	U	0	0	186	38.42	20	0	0.93	0.146	1	0	0	1	O	0.93
AF-P02461-F1	A	A	170	0	-	2397	U	0	0	99	42.31	20	0	0.495	0.201	1	0	0	1	O	0.495
AF-P02461-F1	A	G	171	0	-	2397	U	0	0	63	35.85	20	0	0.315	0.11	1	0	0	1	O	0.315
AF-P02461-F1	A	Y	172	0	-	2397	U	0	0	200	42.06	20	0	1	0.198	1	0	0	1	O	1
AF-P02461-F1	A	P	173	0	-	2397	U	0	0	126	44.18	20	0	0.63	0.228	1	0	0	1	O	0.63
AF-P02461-F1	A	G	174	0	-	2397	U	0	0	72	39.62	20	0	0.36	0.163	1	0	0	1	O	0.36
AF-P02461-F1	A	P	175	0	-	2397	U	0	0	131	46.99	20	0	0.655	0.268	1	0	0	1	O	0.655
AF-P02461-F1	A	A	176	0	-	2397	U	0	0	101	37.98	20	0	0.505	0.14	1	0	0	1	O	0.505
AF-P02461-F1	A	G	177	0	-	2397	U	0	0	61	57.52	20	0	0.305	0.417	1	0	0	1	O	0.305
AF-P02461-F1	A	P	178	0	-	2397	U	0	0	123	52.55	20	0	0.615	0.346	1	0	0	1	O	0.615
AF-P02461-F1	A	P	179	0	-	2397	U	0	0	127	53.81	20	0	0.635	0.364	1	0	0	1	O	0.635
AF-P02461-F1	A	G	180	0	-	2397	U	0	0	59	56.41	20	0	0.295	0.401	1	0	0	1	O	0.295
AF-P02461-F1	A	P	181	0	-	2397	U	0	0	124	53.36	20	0	0.62	0.358	1	0	0	1	O	0.62
AF-P02461-F1	A	P	182	0	-	2397	U	0	0	129	54.55	20	0	0.645	0.375	1	0	0	1	O	0.645
AF-P02461-F1	A	G	183	0	-	2397	U	0	0	56	50.11	20	0	0.28	0.312	1	0	0	1	O	0.28
AF-P02461-F1	A	P	184	0	-	2397	U	0	0	122	51.79	20	0	0.61	0.336	1	0	0	1	O	0.61
AF-P02461-F1	A	P	185	0	-	2397	U	0	0	123	50.7	20	0	0.615	0.32	1	0	0	1	O	0.615
AF-P02461-F1	A	G	186	0	-	2397	U	0	0	69	46.08	20	0	0.345	0.255	1	0	0	1	O	0.345
AF-P02461-F1	A	T	187	0	-	2397	U	0	0	141	40.78	20	0	0.705	0.18	1	0	0	1	O	0.705
AF-P02461-F1	A	S	188	0	-	2397	U	0	0	114	44.72	20	0	0.57	0.236	1	0	0	1	O	0.57
AF-P02461-F1	A	G	189	0	-	2397	U	0	0	66	42.18	20	0	0.33	0.2	1	0	0	1	O	0.33
AF-P02461-F1	A	H	190	0	-	2397	U	0	0	185	40.57	20	0	0.925	0.177	1	0	0	1	O	0.925
AF-P02461-F1	A	P	191	0	-	2397	U	0	0	122	48.67	20	0	0.61	0.292	1	0	0	1	O	0.61
AF-P02461-F1	A	G	192	0	-	2397	U	0	0	65	48.13	20	0	0.325	0.284	1	0	0	1	O	0.325
AF-P02461-F1	A	S	193	0	-	2397	U	0	0	114	46.24	20	0	0.57	0.257	1	0	0	1	O	0.57
AF-P02461-F1	A	P	194	0	-	2397	U	0	0	128	49.48	20	0	0.64	0.303	1	0	0	1	O	0.64
AF-P02461-F1	A	G	195	0	-	2397	U	0	0	69	43.69	20	0	0.345	0.221	1	0	0	1	O	0.345
AF-P02461-F1	A	S	196	0	-	2397	U	0	0	109	41.71	20	0	0.545	0.193	1	0	0	1	O	0.545
AF-P02461-F1	A	P	197	0	-	2397	U	0	0	117	47.5	20	0	0.585	0.275	1	0	0	1	O	0.585
AF-P02461-F1	A	G	198	1	M10.013|M10.004	2397	U	0	0	76	36.72	20	0	0.38	0.122	1	0	0	1	O	0.38
AF-P02461-F1	A	Y	199	0	-	2397	U	0	0	200	39.14	20	0	1	0.157	1	0	0	1	O	1
AF-P02461-F1	A	Q	200	0	-	2397	U	0	0	192	46.11	20	0	0.96	0.255	1	0	0	1	O	0.96
AF-P02461-F1	A	G	201	0	-	2397	U	0	0	55	46.46	20	0	0.275	0.26	1	0	0	1	O	0.275
AF-P02461-F1	A	P	202	0	-	2397	U	0	0	119	44.26	20	0	0.595	0.229	1	0	0	1	O	0.595
AF-P02461-F1	A	P	203	0	-	2397	U	0	0	132	49.13	20	0	0.66	0.298	1	0	0	1	O	0.66
AF-P02461-F1	A	G	204	0	-	2397	U	0	0	76	40.19	20	0	0.38	0.171	1	0	0	1	O	0.38
AF-P02461-F1	A	E	205	0	-	2397	U	0	0	187	44.83	20	0	0.935	0.237	1	0	0	1	O	0.935
AF-P02461-F1	A	P	206	0	-	2397	U	0	0	130	49.82	20	0	0.65	0.308	1	0	0	1	O	0.65
AF-P02461-F1	A	G	207	0	-	2397	U	0	0	74	45.01	20	0	0.37	0.24	1	0	0	1	O	0.37
AF-P02461-F1	A	Q	208	0	-	2397	U	0	0	192	43.09	20	0	0.96	0.213	1	0	0	1	O	0.96
AF-P02461-F1	A	A	209	0	-	2397	U	0	0	105	50.11	20	0	0.525	0.312	1	0	0	1	O	0.525
AF-P02461-F1	A	G	210	0	-	2397	U	0	0	56	50.34	20	0	0.28	0.315	1	0	0	1	O	0.28
AF-P02461-F1	A	P	211	0	-	2397	U	0	0	131	44.01	20	0	0.655	0.226	1	0	0	1	O	0.655
AF-P02461-F1	A	S	212	0	-	2397	U	0	0	121	56.27	20	0	0.605	0.399	1	0	0	1	O	0.605
AF-P02461-F1	A	G	213	0	-	2397	U	0	0	57	49.51	20	0	0.285	0.303	1	0	0	1	O	0.285
AF-P02461-F1	A	P	214	0	-	2397	U	0	0	120	48.35	20	0	0.6	0.287	1	0	0	1	O	0.6
AF-P02461-F1	A	P	215	0	-	2397	U	0	0	129	55.52	20	0	0.645	0.389	1	0	0	1	O	0.645
AF-P02461-F1	A	G	216	0	-	2397	U	0	0	60	51.53	20	0	0.3	0.332	1	0	0	1	O	0.3
AF-P02461-F1	A	P	217	0	-	2397	U	0	0	119	47.29	20	0	0.595	0.272	1	0	0	1	O	0.595
AF-P02461-F1	A	P	218	0	-	2397	U	0	0	129	52.36	20	0	0.645	0.344	1	0	0	1	O	0.645
AF-P02461-F1	A	G	219	1	M10.004|M10.013	2397	U	0	0	70	47.91	20	0	0.35	0.281	1	0	0	1	O	0.35
AF-P02461-F1	A	A	220	0	-	2397	U	0	0	99	40.73	20	0	0.495	0.179	1	0	0	1	O	0.495
AF-P02461-F1	A	I	221	0	-	2397	U	0	0	161	46.68	20	0	0.805	0.263	1	0	0	1	O	0.805
AF-P02461-F1	A	G	222	0	-	2397	U	0	0	51	50.52	20	0	0.255	0.318	1	0	0	1	O	0.255
AF-P02461-F1	A	P	223	0	-	2397	U	0	0	126	47.11	20	0	0.63	0.269	1	0	0	1	O	0.63
AF-P02461-F1	A	S	224	0	-	2397	U	0	0	113	48.64	20	0	0.565	0.291	1	0	0	1	O	0.565
AF-P02461-F1	A	G	225	0	-	2397	U	0	0	63	49.91	20	0	0.315	0.309	1	0	0	1	O	0.315
AF-P02461-F1	A	P	226	0	-	2397	U	0	0	130	48.73	20	0	0.65	0.292	1	0	0	1	O	0.65
AF-P02461-F1	A	A	227	0	-	2397	U	0	0	94	47	20	0	0.47	0.268	1	0	0	1	O	0.47
AF-P02461-F1	A	G	228	0	-	2397	U	0	0	61	47.04	20	0	0.305	0.268	1	0	0	1	O	0.305
AF-P02461-F1	A	K	229	0	-	2397	U	0	0	200	37.69	20	0	1	0.136	1	0	0	1	O	1
AF-P02461-F1	A	D	230	0	-	2397	U	0	0	156	43.46	20	0	0.78	0.218	1	0	0	1	O	0.78
AF-P02461-F1	A	G	231	0	-	2397	U	0	0	59	47.59	20	0	0.295	0.276	1	0	0	1	O	0.295
AF-P02461-F1	A	E	232	0	-	2397	U	0	0	197	37.61	20	0	0.985	0.135	1	0	0	1	O	0.985
AF-P02461-F1	A	S	233	0	-	2397	U	0	0	118	52.15	20	0	0.59	0.341	1	0	0	1	O	0.59
AF-P02461-F1	A	G	234	0	-	2397	U	0	0	63	51.6	20	0	0.315	0.333	1	0	0	1	O	0.315
AF-P02461-F1	A	R	235	0	-	2397	U	0	0	200	43.56	20	0	1	0.219	1	0	0	1	O	1
AF-P02461-F1	A	P	236	0	-	2397	U	0	0	126	50.98	20	0	0.63	0.324	1	0	0	1	O	0.63
AF-P02461-F1	A	G	237	0	-	2397	U	0	0	64	45.5	20	0	0.32	0.247	1	0	0	1	O	0.32
AF-P02461-F1	A	R	238	0	-	2397	U	0	0	158	43.9	20	0	0.79	0.224	1	0	0	1	O	0.79
AF-P02461-F1	A	P	239	0	-	2397	S	0	0	132	49.18	20	0	0.66	0.299	1	0	0	1	O	0.66
AF-P02461-F1	A	G	240	0	-	2397	U	0	0	66	42.03	20	0	0.33	0.198	1	0	0	1	O	0.33
AF-P02461-F1	A	E	241	0	-	2397	U	0	0	125	39.98	20	0	0.625	0.168	1	0	0	1	O	0.625
AF-P02461-F1	A	R	242	0	-	2397	U	0	0	200	41.63	20	0	1	0.192	1	0	0	1	O	1
AF-P02461-F1	A	G	243	0	-	2397	U	0	0	57	43.89	20	0	0.285	0.224	1	0	0	1	O	0.285
AF-P02461-F1	A	L	244	0	-	2397	U	0	0	161	39.74	20	0	0.805	0.165	1	0	0	1	O	0.805
AF-P02461-F1	A	P	245	0	-	2397	U	0	0	93	49.32	20	0	0.465	0.301	1	0	0	1	O	0.465
AF-P02461-F1	A	G	246	0	-	2397	U	0	0	57	46.85	20	0	0.285	0.266	1	0	0	1	O	0.285
AF-P02461-F1	A	P	247	0	-	2397	G	0	0	110	43.44	0	0	0.55	0.217	0	0	1	0	H	0.55
AF-P02461-F1	A	P	248	0	-	2397	G	0	0	105	47.22	0	0	0.525	0.271	0	0	1	0	H	0.525
AF-P02461-F1	A	G	249	0	-	2397	G	0	0	71	47.59	0	0	0.355	0.276	0	0	1	0	H	0.355
AF-P02461-F1	A	I	250	0	-	2397	G	0	0	165	44.42	0	0	0.825	0.231	0	0	1	0	H	0.825
AF-P02461-F1	A	K	251	0	-	2397	U	0	0	171	42.41	2	0	0.855	0.203	0.1	0	0	1	O	0.855
AF-P02461-F1	A	G	252	0	-	2397	U	0	0	51	53.69	2	0	0.255	0.363	0.1	0	0	1	O	0.255
AF-P02461-F1	A	P	253	0	-	2397	G	0	0	122	47.21	0	0	0.61	0.271	0	0	1	0	H	0.61
AF-P02461-F1	A	A	254	0	-	2397	G	0	0	70	46.96	0	0	0.35	0.267	0	0	1	0	H	0.35
AF-P02461-F1	A	G	255	0	-	2397	G	0	0	70	46.44	0	0	0.35	0.26	0	0	1	0	H	0.35
AF-P02461-F1	A	I	256	0	-	2397	U	0	0	130	46.97	20	0	0.65	0.267	1	0	0	1	O	0.65
AF-P02461-F1	A	P	257	0	-	2397	U	0	0	118	47.35	20	0	0.59	0.273	1	0	0	1	O	0.59
AF-P02461-F1	A	G	258	0	-	2397	U	0	0	63	38.88	20	0	0.315	0.153	1	0	0	1	O	0.315
AF-P02461-F1	A	F	259	0	-	2397	U	0	0	171	41.68	20	0	0.855	0.193	1	0	0	1	O	0.855
AF-P02461-F1	A	P	260	0	-	2397	T	0	0	126	49.32	20	0	0.63	0.301	1	0	0	1	O	0.63
AF-P02461-F1	A	G	261	0	-	2397	T	0	0	66	36.7	20	0	0.33	0.122	1	0	0	1	O	0.33
AF-P02461-F1	A	M	262	0	-	2397	U	0	0	170	36.33	20	0	0.85	0.117	1	0	0	1	O	0.85
AF-P02461-F1	A	K	263	0	-	2397	U	0	0	200	42.91	20	0	1	0.21	1	0	0	1	O	1
AF-P02461-F1	A	G	264	0	-	2397	U	0	0	58	37.9	20	0	0.29	0.139	1	0	0	1	O	0.29
AF-P02461-F1	A	H	265	0	-	2397	U	0	0	193	39.17	20	0	0.965	0.157	1	0	0	1	O	0.965
AF-P02461-F1	A	R	266	0	-	2397	U	0	0	200	43.15	20	0	1	0.213	1	0	0	1	O	1
AF-P02461-F1	A	G	267	0	-	2397	U	0	0	47	37.82	20	0	0.235	0.138	1	0	0	1	O	0.235
AF-P02461-F1	A	F	268	0	-	2397	U	0	0	200	37.01	20	0	1	0.126	1	0	0	1	O	1
AF-P02461-F1	A	D	269	0	-	2397	U	0	0	142	43.84	20	0	0.71	0.223	1	0	0	1	O	0.71
AF-P02461-F1	A	G	270	0	-	2397	U	0	0	68	39.02	20	0	0.34	0.155	1	0	0	1	O	0.34
AF-P02461-F1	A	R	271	0	-	2397	U	0	0	200	36.37	20	0	1	0.117	1	0	0	1	O	1
AF-P02461-F1	A	N	272	0	-	2397	U	0	0	157	44.9	20	0	0.785	0.238	1	0	0	1	O	0.785
AF-P02461-F1	A	G	273	0	-	2397	S	0	0	67	39.48	20	0	0.335	0.161	1	0	0	1	O	0.335
AF-P02461-F1	A	E	274	0	-	2397	U	0	0	186	39.45	20	0	0.93	0.161	1	0	0	1	O	0.93
AF-P02461-F1	A	K	275	0	-	2397	U	0	0	200	39.03	20	0	1	0.155	1	0	0	1	O	1
AF-P02461-F1	A	G	276	0	-	2397	U	0	0	78	45.18	20	0	0.39	0.242	1	0	0	1	O	0.39
AF-P02461-F1	A	E	277	0	-	2397	U	0	0	190	35.71	20	0	0.95	0.108	1	0	0	1	O	0.95
AF-P02461-F1	A	T	278	0	-	2397	U	0	0	148	38.88	20	0	0.74	0.153	1	0	0	1	O	0.74
AF-P02461-F1	A	G	279	0	-	2397	U	0	0	76	39.83	20	0	0.38	0.166	1	0	0	1	O	0.38
AF-P02461-F1	A	A	280	0	-	2397	U	0	0	97	41.91	20	0	0.485	0.196	1	0	0	1	O	0.485
AF-P02461-F1	A	P	281	0	-	2397	U	0	0	134	45.14	20	0	0.67	0.242	1	0	0	1	O	0.67
AF-P02461-F1	A	G	282	0	-	2397	U	0	0	71	40.02	20	0	0.355	0.169	1	0	0	1	O	0.355
AF-P02461-F1	A	L	283	0	-	2397	U	0	0	186	36.85	20	0	0.93	0.124	1	0	0	1	O	0.93
AF-P02461-F1	A	K	284	0	-	2397	U	0	0	200	41.83	20	0	1	0.195	1	0	0	1	O	1
AF-P02461-F1	A	G	285	0	-	2397	U	0	0	69	46.68	20	0	0.345	0.263	1	0	0	1	O	0.345
AF-P02461-F1	A	E	286	0	-	2397	U	0	0	178	45.34	20	0	0.89	0.244	1	0	0	1	O	0.89
AF-P02461-F1	A	N	287	0	-	2397	U	0	0	156	43.4	20	0	0.78	0.217	1	0	0	1	O	0.78
AF-P02461-F1	A	G	288	0	-	2397	U	0	0	72	44.29	20	0	0.36	0.23	1	0	0	1	O	0.36
AF-P02461-F1	A	L	289	0	-	2397	S	0	0	166	40.59	20	0	0.83	0.177	1	0	0	1	O	0.83
AF-P02461-F1	A	P	290	0	-	2397	U	0	0	132	54.61	20	0	0.66	0.376	1	0	0	1	O	0.66
AF-P02461-F1	A	G	291	0	-	2397	U	0	0	67	48.58	20	0	0.335	0.29	1	0	0	1	O	0.335
AF-P02461-F1	A	E	292	0	-	2397	U	0	0	200	39.41	20	0	1	0.16	1	0	0	1	O	1
AF-P02461-F1	A	N	293	0	-	2397	U	0	0	167	44.09	20	0	0.835	0.227	1	0	0	1	O	0.835
AF-P02461-F1	A	G	294	0	-	2397	U	0	0	66	46.47	20	0	0.33	0.26	1	0	0	1	O	0.33
AF-P02461-F1	A	A	295	0	-	2397	U	0	0	98	37.93	20	0	0.49	0.139	1	0	0	1	O	0.49
AF-P02461-F1	A	P	296	0	-	2397	U	0	0	126	55.4	20	0	0.63	0.387	1	0	0	1	O	0.63
AF-P02461-F1	A	G	297	0	-	2397	U	0	0	65	51.5	20	0	0.325	0.332	1	0	0	1	O	0.325
AF-P02461-F1	A	P	298	0	-	2397	U	0	0	143	52.83	20	0	0.715	0.35	1	0	0	1	O	0.715
AF-P02461-F1	A	M	299	0	-	2397	U	0	0	186	41.43	20	0	0.93	0.189	1	0	0	1	O	0.93
AF-P02461-F1	A	G	300	0	-	2397	U	0	0	63	47.59	20	0	0.315	0.276	1	0	0	1	O	0.315
AF-P02461-F1	A	P	301	0	-	2397	U	0	0	136	53.93	20	0	0.68	0.366	1	0	0	1	O	0.68
AF-P02461-F1	A	R	302	0	-	2397	U	0	0	200	42.71	20	0	1	0.207	1	0	0	1	O	1
AF-P02461-F1	A	G	303	0	-	2397	U	0	0	64	43.22	20	0	0.32	0.214	1	0	0	1	O	0.32
AF-P02461-F1	A	A	304	0	-	2397	U	0	0	106	44.6	20	0	0.53	0.234	1	0	0	1	O	0.53
AF-P02461-F1	A	P	305	0	-	2397	U	0	0	129	47.74	20	0	0.645	0.278	1	0	0	1	O	0.645
AF-P02461-F1	A	G	306	0	-	2397	U	0	0	73	44.62	20	0	0.365	0.234	1	0	0	1	O	0.365
AF-P02461-F1	A	E	307	0	-	2397	U	0	0	199	40.4	20	0	0.995	0.174	1	0	0	1	O	0.995
AF-P02461-F1	A	R	308	0	-	2397	U	0	0	200	42.21	20	0	1	0.2	1	0	0	1	O	1
AF-P02461-F1	A	G	309	0	-	2397	U	0	0	35	49.29	20	0	0.175	0.3	1	0	0	1	O	0.175
AF-P02461-F1	A	R	310	0	-	2397	U	0	0	200	40.09	20	0	1	0.17	1	0	0	1	O	1
AF-P02461-F1	A	P	311	0	-	2397	U	0	0	61	42.12	20	0	0.305	0.199	1	0	0	1	O	0.305
AF-P02461-F1	A	G	312	0	-	2397	U	0	0	45	36.23	20	0	0.225	0.115	1	0	0	1	O	0.225
AF-P02461-F1	A	L	313	0	-	2397	U	0	0	170	35.06	20	0	0.85	0.099	1	0	0	1	O	0.85
AF-P02461-F1	A	P	314	0	-	2397	U	0	0	100	50.74	20	0	0.5	0.321	1	0	0	1	O	0.5
AF-P02461-F1	A	G	315	0	-	2397	U	0	0	77	43.87	20	0	0.385	0.224	1	0	0	1	O	0.385
AF-P02461-F1	A	A	316	0	-	2397	U	0	0	106	43.58	20	0	0.53	0.219	1	0	0	1	O	0.53
AF-P02461-F1	A	A	317	0	-	2397	U	0	0	111	48.57	20	0	0.555	0.29	1	0	0	1	O	0.555
AF-P02461-F1	A	G	318	0	-	2397	U	0	0	78	41.94	20	0	0.39	0.196	1	0	0	1	O	0.39
AF-P02461-F1	A	A	319	0	-	2397	U	0	0	98	35.17	20	0	0.49	0.1	1	0	0	1	O	0.49
AF-P02461-F1	A	R	320	0	-	2397	U	0	0	200	41.35	20	0	1	0.188	1	0	0	1	O	1
AF-P02461-F1	A	G	321	0	-	2397	U	0	0	64	42.93	20	0	0.32	0.21	1	0	0	1	O	0.32
AF-P02461-F1	A	N	322	0	-	2397	U	0	0	138	34.24	20	0	0.69	0.087	1	0	0	1	O	0.69
AF-P02461-F1	A	D	323	0	-	2397	U	0	0	158	40.08	20	0	0.79	0.17	1	0	0	1	O	0.79
AF-P02461-F1	A	G	324	0	-	2397	U	0	0	84	44.47	20	0	0.42	0.232	1	0	0	1	O	0.42
AF-P02461-F1	A	A	325	0	-	2397	U	0	0	94	33.21	20	0	0.47	0.073	1	0	0	1	O	0.47
AF-P02461-F1	A	R	326	0	-	2397	U	0	0	200	41.38	20	0	1	0.188	1	0	0	1	O	1
AF-P02461-F1	A	G	327	0	-	2397	U	0	0	67	42.05	20	0	0.335	0.198	1	0	0	1	O	0.335
AF-P02461-F1	A	S	328	0	-	2397	U	0	0	107	34.49	20	0	0.535	0.091	1	0	0	1	O	0.535
AF-P02461-F1	A	D	329	0	-	2397	U	0	0	158	32.7	20	0	0.79	0.065	1	0	0	1	O	0.79
AF-P02461-F1	A	G	330	0	-	2397	U	0	0	70	33.53	20	0	0.35	0.077	1	0	0	1	O	0.35
AF-P02461-F1	A	Q	331	0	-	2397	U	0	0	197	34.24	20	0	0.985	0.087	1	0	0	1	O	0.985
AF-P02461-F1	A	P	332	0	-	2397	U	0	0	126	40.05	20	0	0.63	0.169	1	0	0	1	O	0.63
AF-P02461-F1	A	G	333	0	-	2397	U	0	0	65	42.34	20	0	0.325	0.202	1	0	0	1	O	0.325
AF-P02461-F1	A	P	334	0	-	2397	U	0	0	131	42.09	20	0	0.655	0.198	1	0	0	1	O	0.655
AF-P02461-F1	A	P	335	0	-	2397	U	0	0	126	48.04	20	0	0.63	0.283	1	0	0	1	O	0.63
AF-P02461-F1	A	G	336	0	-	2397	U	0	0	64	45.49	20	0	0.32	0.246	1	0	0	1	O	0.32
AF-P02461-F1	A	P	337	0	-	2397	U	0	0	128	46.56	20	0	0.64	0.262	1	0	0	1	O	0.64
AF-P02461-F1	A	P	338	0	-	2397	U	0	0	120	59.84	20	0	0.6	0.45	1	0	0	1	O	0.6
AF-P02461-F1	A	G	339	0	-	2397	U	0	0	47	44.37	20	0	0.235	0.231	1	0	0	1	O	0.235
AF-P02461-F1	A	T	340	0	-	2397	U	0	0	147	36.25	20	0	0.735	0.116	1	0	0	1	O	0.735
AF-P02461-F1	A	A	341	0	-	2397	U	0	0	64	43.85	20	0	0.32	0.223	1	0	0	1	O	0.32
AF-P02461-F1	A	G	342	0	-	2397	U	0	0	73	42.21	20	0	0.365	0.2	1	0	0	1	O	0.365
AF-P02461-F1	A	F	343	0	-	2397	U	0	0	200	30.97	20	0	1	0.041	1	0	0	1	O	1
AF-P02461-F1	A	P	344	0	-	2397	U	0	0	120	50.88	20	0	0.6	0.323	1	0	0	1	O	0.6
AF-P02461-F1	A	G	345	0	-	2397	U	0	0	76	41.15	20	0	0.38	0.185	1	0	0	1	O	0.38
AF-P02461-F1	A	S	346	0	-	2397	U	0	0	114	35.43	20	0	0.57	0.104	1	0	0	1	O	0.57
AF-P02461-F1	A	P	347	0	-	2397	U	0	0	133	52.94	20	0	0.665	0.352	1	0	0	1	O	0.665
AF-P02461-F1	A	G	348	0	-	2397	U	0	0	79	42.9	20	0	0.395	0.21	1	0	0	1	O	0.395
AF-P02461-F1	A	A	349	0	-	2397	U	0	0	109	38.58	20	0	0.545	0.149	1	0	0	1	O	0.545
AF-P02461-F1	A	K	350	0	-	2397	U	0	0	200	35.61	20	0	1	0.107	1	0	0	1	O	1
AF-P02461-F1	A	G	351	0	-	2397	U	0	0	64	39.59	20	0	0.32	0.163	1	0	0	1	O	0.32
AF-P02461-F1	A	E	352	0	-	2397	U	0	0	176	34.32	20	0	0.88	0.088	1	0	0	1	O	0.88
AF-P02461-F1	A	V	353	0	-	2397	U	0	0	135	33.88	20	0	0.675	0.082	1	0	0	1	O	0.675
AF-P02461-F1	A	G	354	0	-	2397	U	0	0	66	40.68	20	0	0.33	0.178	1	0	0	1	O	0.33
AF-P02461-F1	A	P	355	0	-	2397	U	0	0	138	40.09	20	0	0.69	0.17	1	0	0	1	O	0.69
AF-P02461-F1	A	A	356	0	-	2397	U	0	0	105	34.55	20	0	0.525	0.092	1	0	0	1	O	0.525
AF-P02461-F1	A	G	357	0	-	2397	U	0	0	63	36.29	20	0	0.315	0.116	1	0	0	1	O	0.315
AF-P02461-F1	A	S	358	0	-	2397	U	0	0	119	35.59	20	0	0.595	0.106	1	0	0	1	O	0.595
AF-P02461-F1	A	P	359	0	-	2397	U	0	0	122	40.9	20	0	0.61	0.182	1	0	0	1	O	0.61
AF-P02461-F1	A	G	360	0	-	2397	U	0	0	80	36.63	20	0	0.4	0.121	1	0	0	1	O	0.4
AF-P02461-F1	A	S	361	0	-	2397	U	0	0	120	40.36	20	0	0.6	0.174	1	0	0	1	O	0.6
AF-P02461-F1	A	N	362	0	-	2397	U	0	0	168	31.62	20	0	0.84	0.05	1	0	0	1	O	0.84
AF-P02461-F1	A	G	363	0	-	2397	U	0	0	66	38.26	20	0	0.33	0.144	1	0	0	1	O	0.33
AF-P02461-F1	A	A	364	0	-	2397	U	0	0	99	32.41	20	0	0.495	0.061	1	0	0	1	O	0.495
AF-P02461-F1	A	P	365	0	-	2397	U	0	0	134	45.45	20	0	0.67	0.246	1	0	0	1	O	0.67
AF-P02461-F1	A	G	366	0	-	2397	U	0	0	73	38.21	20	0	0.365	0.143	1	0	0	1	O	0.365
AF-P02461-F1	A	Q	367	0	-	2397	U	0	0	180	39.11	20	0	0.9	0.156	1	0	0	1	O	0.9
AF-P02461-F1	A	R	368	0	-	2397	U	0	0	200	36.06	20	0	1	0.113	1	0	0	1	O	1
AF-P02461-F1	A	G	369	0	-	2397	U	0	0	71	39.67	20	0	0.355	0.164	1	0	0	1	O	0.355
AF-P02461-F1	A	E	370	0	-	2397	U	0	0	191	39.34	20	0	0.955	0.159	1	0	0	1	O	0.955
AF-P02461-F1	A	P	371	0	-	2397	U	0	0	129	40.62	20	0	0.645	0.178	1	0	0	1	O	0.645
AF-P02461-F1	A	G	372	0	-	2397	U	0	0	71	45.64	20	0	0.355	0.249	1	0	0	1	O	0.355
AF-P02461-F1	A	P	373	0	-	2397	U	0	0	123	43.19	20	0	0.615	0.214	1	0	0	1	O	0.615
AF-P02461-F1	A	Q	374	1	M12.225	2397	U	0	0	161	37.99	20	0	0.805	0.14	1	0	0	1	O	0.805
AF-P02461-F1	A	G	375	0	-	2397	U	0	0	59	41.38	20	0	0.295	0.188	1	0	0	1	O	0.295
AF-P02461-F1	A	H	376	0	-	2397	U	0	0	192	35.84	20	0	0.96	0.11	1	0	0	1	O	0.96
AF-P02461-F1	A	A	377	0	-	2397	U	0	0	103	35.26	20	0	0.515	0.102	1	0	0	1	O	0.515
AF-P02461-F1	A	G	378	0	-	2397	U	0	0	74	39.78	20	0	0.37	0.166	1	0	0	1	O	0.37
AF-P02461-F1	A	A	379	0	-	2397	U	0	0	100	33.37	20	0	0.5	0.075	1	0	0	1	O	0.5
AF-P02461-F1	A	Q	380	0	-	2397	U	0	0	200	37.78	20	0	1	0.137	1	0	0	1	O	1
AF-P02461-F1	A	G	381	0	-	2397	U	0	0	65	40.95	20	0	0.325	0.182	1	0	0	1	O	0.325
AF-P02461-F1	A	P	382	0	-	2397	U	0	0	127	47.2	20	0	0.635	0.271	1	0	0	1	O	0.635
AF-P02461-F1	A	P	383	0	-	2397	U	0	0	131	40.22	20	0	0.655	0.172	1	0	0	1	O	0.655
AF-P02461-F1	A	G	384	0	-	2397	U	0	0	65	37.19	20	0	0.325	0.129	1	0	0	1	O	0.325
AF-P02461-F1	A	P	385	0	-	2397	U	0	0	125	44.87	20	0	0.625	0.238	1	0	0	1	O	0.625
AF-P02461-F1	A	P	386	0	-	2397	U	0	0	131	44.59	20	0	0.655	0.234	1	0	0	1	O	0.655
AF-P02461-F1	A	G	387	0	-	2397	U	0	0	74	42.57	20	0	0.37	0.205	1	0	0	1	O	0.37
AF-P02461-F1	A	I	388	0	-	2397	U	0	0	155	33.89	20	0	0.775	0.082	1	0	0	1	O	0.775
AF-P02461-F1	A	N	389	1	M12.225	2397	U	0	0	164	33.2	20	0	0.82	0.072	1	0	0	1	O	0.82
AF-P02461-F1	A	G	390	0	-	2397	U	0	0	85	41.04	20	0	0.425	0.183	1	0	0	1	O	0.425
AF-P02461-F1	A	S	391	0	-	2397	U	0	0	109	32.57	20	0	0.545	0.064	1	0	0	1	O	0.545
AF-P02461-F1	A	P	392	0	-	2397	U	0	0	76	48.5	20	0	0.38	0.289	1	0	0	1	O	0.38
AF-P02461-F1	A	G	393	0	-	2397	U	0	0	65	38.11	20	0	0.325	0.142	1	0	0	1	O	0.325
AF-P02461-F1	A	G	394	0	-	2397	U	0	0	64	39.98	20	0	0.32	0.168	1	0	0	1	O	0.32
AF-P02461-F1	A	K	395	0	-	2397	U	0	0	200	36.36	20	0	1	0.117	1	0	0	1	O	1
AF-P02461-F1	A	G	396	0	-	2397	U	0	0	67	40.44	20	0	0.335	0.175	1	0	0	1	O	0.335
AF-P02461-F1	A	E	397	0	-	2397	U	0	0	199	33.78	20	0	0.995	0.081	1	0	0	1	O	0.995
AF-P02461-F1	A	M	398	0	-	2397	U	0	0	190	44.5	20	0	0.95	0.232	1	0	0	1	O	0.95
AF-P02461-F1	A	G	399	0	-	2397	U	0	0	60	48.96	20	0	0.3	0.296	1	0	0	1	O	0.3
AF-P02461-F1	A	P	400	0	-	2397	U	0	0	130	37.61	20	0	0.65	0.135	1	0	0	1	O	0.65
AF-P02461-F1	A	A	401	0	-	2397	U	0	0	101	43.55	20	0	0.505	0.219	1	0	0	1	O	0.505
AF-P02461-F1	A	G	402	0	-	2397	U	0	0	61	45	20	0	0.305	0.24	1	0	0	1	O	0.305
AF-P02461-F1	A	I	403	0	-	2397	U	0	0	169	32.35	20	0	0.845	0.06	1	0	0	1	O	0.845
AF-P02461-F1	A	P	404	0	-	2397	U	0	0	121	46.31	20	0	0.605	0.258	1	0	0	1	O	0.605
AF-P02461-F1	A	G	405	0	-	2397	U	0	0	55	42.63	20	0	0.275	0.206	1	0	0	1	O	0.275
AF-P02461-F1	A	A	406	0	-	2397	U	0	0	104	33.14	20	0	0.52	0.072	1	0	0	1	O	0.52
AF-P02461-F1	A	P	407	0	-	2397	U	0	0	128	42.54	20	0	0.64	0.205	1	0	0	1	O	0.64
AF-P02461-F1	A	G	408	0	-	2397	U	0	0	73	43.82	20	0	0.365	0.223	1	0	0	1	O	0.365
AF-P02461-F1	A	L	409	0	-	2397	U	0	0	185	32.93	20	0	0.925	0.069	1	0	0	1	O	0.925
AF-P02461-F1	A	M	410	0	-	2397	U	0	0	189	36.9	20	0	0.945	0.125	1	0	0	1	O	0.945
AF-P02461-F1	A	G	411	0	-	2397	U	0	0	69	39.27	20	0	0.345	0.158	1	0	0	1	O	0.345
AF-P02461-F1	A	A	412	0	-	2397	U	0	0	105	35.22	20	0	0.525	0.101	1	0	0	1	O	0.525
AF-P02461-F1	A	R	413	0	-	2397	U	0	0	200	40.81	20	0	1	0.18	1	0	0	1	O	1
AF-P02461-F1	A	G	414	0	-	2397	U	0	0	56	46.12	20	0	0.28	0.255	1	0	0	1	O	0.28
AF-P02461-F1	A	P	415	0	-	2397	U	0	0	126	39.95	20	0	0.63	0.168	1	0	0	1	O	0.63
AF-P02461-F1	A	P	416	0	-	2397	U	0	0	134	42.17	20	0	0.67	0.199	1	0	0	1	O	0.67
AF-P02461-F1	A	G	417	0	-	2397	U	0	0	61	47.78	20	0	0.305	0.279	1	0	0	1	O	0.305
AF-P02461-F1	A	P	418	0	-	2397	U	0	0	128	39.15	20	0	0.64	0.157	1	0	0	1	O	0.64
AF-P02461-F1	A	A	419	0	-	2397	U	0	0	99	36.83	20	0	0.495	0.124	1	0	0	1	O	0.495
AF-P02461-F1	A	G	420	0	-	2397	U	0	0	76	37.4	20	0	0.38	0.132	1	0	0	1	O	0.38
AF-P02461-F1	A	A	421	0	-	2397	U	0	0	94	37.11	20	0	0.47	0.128	1	0	0	1	O	0.47
AF-P02461-F1	A	N	422	0	-	2397	U	0	0	166	32.94	20	0	0.83	0.069	1	0	0	1	O	0.83
AF-P02461-F1	A	G	423	0	-	2397	U	0	0	79	36.56	20	0	0.395	0.12	1	0	0	1	O	0.395
AF-P02461-F1	A	A	424	0	-	2397	U	0	0	101	37.16	20	0	0.505	0.129	1	0	0	1	O	0.505
AF-P02461-F1	A	P	425	0	-	2397	U	0	0	134	40.95	20	0	0.67	0.182	1	0	0	1	O	0.67
AF-P02461-F1	A	G	426	0	-	2397	U	0	0	68	37.57	20	0	0.34	0.134	1	0	0	1	O	0.34
AF-P02461-F1	A	L	427	0	-	2397	U	0	0	155	40.84	20	0	0.775	0.181	1	0	0	1	O	0.775
AF-P02461-F1	A	R	428	0	-	2397	U	0	0	200	37.73	20	0	1	0.137	1	0	0	1	O	1
AF-P02461-F1	A	G	429	0	-	2397	U	0	0	79	41.11	20	0	0.395	0.184	1	0	0	1	O	0.395
AF-P02461-F1	A	G	430	0	-	2397	U	0	0	75	40.11	20	0	0.375	0.17	1	0	0	1	O	0.375
AF-P02461-F1	A	A	431	0	-	2397	U	0	0	118	37.78	20	0	0.59	0.137	1	0	0	1	O	0.59
AF-P02461-F1	A	G	432	0	-	2397	U	0	0	81	44.79	20	0	0.405	0.237	1	0	0	1	O	0.405
AF-P02461-F1	A	E	433	0	-	2397	U	0	0	184	38.47	20	0	0.92	0.147	1	0	0	1	O	0.92
AF-P02461-F1	A	P	434	0	-	2397	U	0	0	127	42.37	20	0	0.635	0.202	1	0	0	1	O	0.635
AF-P02461-F1	A	G	435	0	-	2397	U	0	0	74	45.81	20	0	0.37	0.251	1	0	0	1	O	0.37
AF-P02461-F1	A	K	436	0	-	2397	U	0	0	192	36.99	20	0	0.96	0.126	1	0	0	1	O	0.96
AF-P02461-F1	A	N	437	0	-	2397	U	0	0	168	36.32	20	0	0.84	0.117	1	0	0	1	O	0.84
AF-P02461-F1	A	G	438	0	-	2397	U	0	0	85	43.54	20	0	0.425	0.219	1	0	0	1	O	0.425
AF-P02461-F1	A	A	439	0	-	2397	U	0	0	104	36.88	20	0	0.52	0.125	1	0	0	1	O	0.52
AF-P02461-F1	A	K	440	0	-	2397	U	0	0	200	38.36	20	0	1	0.146	1	0	0	1	O	1
AF-P02461-F1	A	G	441	0	-	2397	U	0	0	69	37.99	20	0	0.345	0.14	1	0	0	1	O	0.345
AF-P02461-F1	A	E	442	0	-	2397	U	0	0	189	41.22	20	0	0.945	0.186	1	0	0	1	O	0.945
AF-P02461-F1	A	P	443	0	-	2397	U	0	0	136	44.78	20	0	0.68	0.236	1	0	0	1	O	0.68
AF-P02461-F1	A	G	444	0	-	2397	U	0	0	66	38.51	20	0	0.33	0.148	1	0	0	1	O	0.33
AF-P02461-F1	A	P	445	0	-	2397	U	0	0	126	44.68	20	0	0.63	0.235	1	0	0	1	O	0.63
AF-P02461-F1	A	R	446	0	-	2397	U	0	0	200	33.17	20	0	1	0.072	1	0	0	1	O	1
AF-P02461-F1	A	G	447	0	-	2397	U	0	0	77	41.52	20	0	0.385	0.19	1	0	0	1	O	0.385
AF-P02461-F1	A	E	448	0	-	2397	U	0	0	163	32.87	20	0	0.815	0.068	1	0	0	1	O	0.815
AF-P02461-F1	A	R	449	0	-	2397	U	0	0	200	34.14	20	0	1	0.086	1	0	0	1	O	1
AF-P02461-F1	A	G	450	0	-	2397	U	0	0	76	38.44	20	0	0.38	0.147	1	0	0	1	O	0.38
AF-P02461-F1	A	E	451	0	-	2397	U	0	0	198	35.21	20	0	0.99	0.101	1	0	0	1	O	0.99
AF-P02461-F1	A	A	452	0	-	2397	U	0	0	110	33.44	20	0	0.55	0.076	1	0	0	1	O	0.55
AF-P02461-F1	A	G	453	0	-	2397	U	0	0	80	37.29	20	0	0.4	0.13	1	0	0	1	O	0.4
AF-P02461-F1	A	I	454	0	-	2397	U	0	0	169	42.63	20	0	0.845	0.206	1	0	0	1	O	0.845
AF-P02461-F1	A	P	455	0	-	2397	U	0	0	131	42.23	20	0	0.655	0.2	1	0	0	1	O	0.655
AF-P02461-F1	A	G	456	0	-	2397	U	0	0	74	40.28	20	0	0.37	0.173	1	0	0	1	O	0.37
AF-P02461-F1	A	V	457	0	-	2397	U	0	0	143	47.63	20	0	0.715	0.277	1	0	0	1	O	0.715
AF-P02461-F1	A	P	458	0	-	2397	U	0	0	127	48.72	20	0	0.635	0.292	1	0	0	1	O	0.635
AF-P02461-F1	A	G	459	0	-	2397	U	0	0	74	42.57	20	0	0.37	0.205	1	0	0	1	O	0.37
AF-P02461-F1	A	A	460	0	-	2397	U	0	0	101	38.8	20	0	0.505	0.152	1	0	0	1	O	0.505
AF-P02461-F1	A	K	461	0	-	2397	U	0	0	185	44.13	20	0	0.925	0.227	1	0	0	1	O	0.925
AF-P02461-F1	A	G	462	0	-	2397	U	0	0	68	45.37	20	0	0.34	0.245	1	0	0	1	O	0.34
AF-P02461-F1	A	E	463	0	-	2397	U	0	0	145	37.15	20	0	0.725	0.128	1	0	0	1	O	0.725
AF-P02461-F1	A	D	464	0	-	2397	U	0	0	167	44.55	20	0	0.835	0.233	1	0	0	1	O	0.835
AF-P02461-F1	A	G	465	0	-	2397	U	0	0	71	44.93	20	0	0.355	0.239	1	0	0	1	O	0.355
AF-P02461-F1	A	K	466	0	-	2397	U	0	0	187	33.16	20	0	0.935	0.072	1	0	0	1	O	0.935
AF-P02461-F1	A	D	467	0	-	2397	U	0	0	155	32.21	20	0	0.775	0.058	1	0	0	1	O	0.775
AF-P02461-F1	A	G	468	0	-	2397	U	0	0	84	39.77	20	0	0.42	0.166	1	0	0	1	O	0.42
AF-P02461-F1	A	S	469	0	-	2397	U	0	0	117	44.06	20	0	0.585	0.226	1	0	0	1	O	0.585
AF-P02461-F1	A	P	470	0	-	2397	U	0	0	129	43.68	20	0	0.645	0.221	1	0	0	1	O	0.645
AF-P02461-F1	A	G	471	0	-	2397	U	0	0	77	38.59	20	0	0.385	0.149	1	0	0	1	O	0.385
AF-P02461-F1	A	E	472	0	-	2397	U	0	0	192	48.04	20	0	0.96	0.283	1	0	0	1	O	0.96
AF-P02461-F1	A	P	473	0	-	2397	U	0	0	127	44.74	20	0	0.635	0.236	1	0	0	1	O	0.635
AF-P02461-F1	A	G	474	0	-	2397	U	0	0	77	41.49	20	0	0.385	0.19	1	0	0	1	O	0.385
AF-P02461-F1	A	A	475	0	-	2397	U	0	0	93	36.72	20	0	0.465	0.122	1	0	0	1	O	0.465
AF-P02461-F1	A	N	476	0	-	2397	U	0	0	176	38.63	20	0	0.88	0.149	1	0	0	1	O	0.88
AF-P02461-F1	A	G	477	0	-	2397	U	0	0	65	40.36	20	0	0.325	0.174	1	0	0	1	O	0.325
AF-P02461-F1	A	L	478	0	-	2397	U	0	0	173	33.85	20	0	0.865	0.082	1	0	0	1	O	0.865
AF-P02461-F1	A	P	479	0	-	2397	U	0	0	129	45.2	20	0	0.645	0.242	1	0	0	1	O	0.645
AF-P02461-F1	A	G	480	0	-	2397	U	0	0	78	42.12	20	0	0.39	0.199	1	0	0	1	O	0.39
AF-P02461-F1	A	A	481	0	-	2397	U	0	0	107	37.25	20	0	0.535	0.13	1	0	0	1	O	0.535
AF-P02461-F1	A	A	482	0	-	2397	U	0	0	109	34.58	20	0	0.545	0.092	1	0	0	1	O	0.545
AF-P02461-F1	A	G	483	0	-	2397	U	0	0	76	44.19	20	0	0.38	0.228	1	0	0	1	O	0.38
AF-P02461-F1	A	E	484	0	-	2397	U	0	0	155	34.26	20	0	0.775	0.087	1	0	0	1	O	0.775
AF-P02461-F1	A	R	485	0	-	2397	U	0	0	200	30.54	20	0	1	0.035	1	0	0	1	O	1
AF-P02461-F1	A	G	486	0	-	2397	U	0	0	69	38.63	20	0	0.345	0.149	1	0	0	1	O	0.345
AF-P02461-F1	A	A	487	0	-	2397	U	0	0	108	48.95	20	0	0.54	0.295	1	0	0	1	O	0.54
AF-P02461-F1	A	P	488	0	-	2397	U	0	0	128	42.04	20	0	0.64	0.198	1	0	0	1	O	0.64
AF-P02461-F1	A	G	489	0	-	2397	U	0	0	75	37.57	20	0	0.375	0.134	1	0	0	1	O	0.375
AF-P02461-F1	A	F	490	0	-	2397	U	0	0	200	32.15	20	0	1	0.058	1	0	0	1	O	1
AF-P02461-F1	A	R	491	0	-	2397	U	0	0	200	39	20	0	1	0.155	1	0	0	1	O	1
AF-P02461-F1	A	G	492	0	-	2397	U	0	0	59	48.02	20	0	0.295	0.282	1	0	0	1	O	0.295
AF-P02461-F1	A	P	493	0	-	2397	U	0	0	133	44.93	20	0	0.665	0.239	1	0	0	1	O	0.665
AF-P02461-F1	A	A	494	0	-	2397	U	0	0	106	42.67	20	0	0.53	0.207	1	0	0	1	O	0.53
AF-P02461-F1	A	G	495	0	-	2397	U	0	0	69	43.42	20	0	0.345	0.217	1	0	0	1	O	0.345
AF-P02461-F1	A	P	496	0	-	2397	U	0	0	131	46.29	20	0	0.655	0.258	1	0	0	1	O	0.655
AF-P02461-F1	A	N	497	0	-	2397	U	0	0	170	38.88	20	0	0.85	0.153	1	0	0	1	O	0.85
AF-P02461-F1	A	G	498	0	-	2397	U	0	0	66	38.11	20	0	0.33	0.142	1	0	0	1	O	0.33
AF-P02461-F1	A	I	499	0	-	2397	U	0	0	167	44.17	20	0	0.835	0.228	1	0	0	1	O	0.835
AF-P02461-F1	A	P	500	0	-	2397	U	0	0	126	49.53	20	0	0.63	0.304	1	0	0	1	O	0.63
AF-P02461-F1	A	G	501	0	-	2397	U	0	0	73	41.02	20	0	0.365	0.183	1	0	0	1	O	0.365
AF-P02461-F1	A	E	502	0	-	2397	U	0	0	200	44.1	20	0	1	0.227	1	0	0	1	O	1
AF-P02461-F1	A	K	503	0	-	2397	U	0	0	200	39.72	20	0	1	0.165	1	0	0	1	O	1
AF-P02461-F1	A	G	504	0	-	2397	U	0	0	76	46.87	20	0	0.38	0.266	1	0	0	1	O	0.38
AF-P02461-F1	A	P	505	0	-	2397	U	0	0	125	46.69	20	0	0.625	0.263	1	0	0	1	O	0.625
AF-P02461-F1	A	A	506	0	-	2397	U	0	0	106	42.35	20	0	0.53	0.202	1	0	0	1	O	0.53
AF-P02461-F1	A	G	507	0	-	2397	U	0	0	78	43.22	20	0	0.39	0.214	1	0	0	1	O	0.39
AF-P02461-F1	A	E	508	0	-	2397	U	0	0	154	35.54	20	0	0.77	0.106	1	0	0	1	O	0.77
AF-P02461-F1	A	R	509	0	-	2397	U	0	0	200	35.41	20	0	1	0.104	1	0	0	1	O	1
AF-P02461-F1	A	G	510	0	-	2397	U	0	0	64	39.9	20	0	0.32	0.167	1	0	0	1	O	0.32
AF-P02461-F1	A	A	511	0	-	2397	U	0	0	101	36.36	20	0	0.505	0.117	1	0	0	1	O	0.505
AF-P02461-F1	A	P	512	0	-	2397	U	0	0	134	41.41	20	0	0.67	0.189	1	0	0	1	O	0.67
AF-P02461-F1	A	G	513	0	-	2397	U	0	0	72	49.67	20	0	0.36	0.306	1	0	0	1	O	0.36
AF-P02461-F1	A	P	514	0	-	2397	U	0	0	126	46.41	20	0	0.63	0.26	1	0	0	1	O	0.63
AF-P02461-F1	A	A	515	0	-	2397	U	0	0	100	39.84	20	0	0.5	0.167	1	0	0	1	O	0.5
AF-P02461-F1	A	G	516	0	-	2397	U	0	0	71	50.42	20	0	0.355	0.316	1	0	0	1	O	0.355
AF-P02461-F1	A	P	517	0	-	2397	U	0	0	122	46.18	20	0	0.61	0.256	1	0	0	1	O	0.61
AF-P02461-F1	A	R	518	0	-	2397	U	0	0	200	36.34	20	0	1	0.117	1	0	0	1	O	1
AF-P02461-F1	A	G	519	0	-	2397	U	0	0	61	43.35	20	0	0.305	0.216	1	0	0	1	O	0.305
AF-P02461-F1	A	A	520	0	-	2397	U	0	0	103	39.53	20	0	0.515	0.162	1	0	0	1	O	0.515
AF-P02461-F1	A	A	521	0	-	2397	U	0	0	103	38.52	20	0	0.515	0.148	1	0	0	1	O	0.515
AF-P02461-F1	A	G	522	0	-	2397	U	0	0	75	42.8	20	0	0.375	0.208	1	0	0	1	O	0.375
AF-P02461-F1	A	E	523	0	-	2397	U	0	0	190	34.59	20	0	0.95	0.092	1	0	0	1	O	0.95
AF-P02461-F1	A	P	524	0	-	2397	U	0	0	124	44.81	20	0	0.62	0.237	1	0	0	1	O	0.62
AF-P02461-F1	A	G	525	0	-	2397	U	0	0	77	43.77	20	0	0.385	0.222	1	0	0	1	O	0.385
AF-P02461-F1	A	R	526	0	-	2397	U	0	0	200	39.01	20	0	1	0.155	1	0	0	1	O	1
AF-P02461-F1	A	D	527	0	-	2397	U	0	0	142	36.43	20	0	0.71	0.118	1	0	0	1	O	0.71
AF-P02461-F1	A	G	528	0	-	2397	U	0	0	82	40.55	20	0	0.41	0.177	1	0	0	1	O	0.41
AF-P02461-F1	A	V	529	0	-	2397	U	0	0	145	39	20	0	0.725	0.155	1	0	0	1	O	0.725
AF-P02461-F1	A	P	530	0	-	2397	U	0	0	130	44.95	20	0	0.65	0.239	1	0	0	1	O	0.65
AF-P02461-F1	A	G	531	0	-	2397	U	0	0	82	40.86	20	0	0.41	0.181	1	0	0	1	O	0.41
AF-P02461-F1	A	G	532	0	-	2397	U	0	0	75	40.07	20	0	0.375	0.17	1	0	0	1	O	0.375
AF-P02461-F1	A	P	533	0	-	2397	U	0	0	138	43.69	20	0	0.69	0.221	1	0	0	1	O	0.69
AF-P02461-F1	A	G	534	0	-	2397	U	0	0	76	38.88	20	0	0.38	0.153	1	0	0	1	O	0.38
AF-P02461-F1	A	M	535	0	-	2397	U	0	0	182	37.27	20	0	0.91	0.13	1	0	0	1	O	0.91
AF-P02461-F1	A	R	536	0	-	2397	U	0	0	200	36.82	20	0	1	0.124	1	0	0	1	O	1
AF-P02461-F1	A	G	537	0	-	2397	U	0	0	63	44.81	20	0	0.315	0.237	1	0	0	1	O	0.315
AF-P02461-F1	A	M	538	0	-	2397	U	0	0	180	38.34	20	0	0.9	0.145	1	0	0	1	O	0.9
AF-P02461-F1	A	P	539	0	-	2397	U	0	0	125	45.59	20	0	0.625	0.248	1	0	0	1	O	0.625
AF-P02461-F1	A	G	540	0	-	2397	U	0	0	76	36.94	20	0	0.38	0.125	1	0	0	1	O	0.38
AF-P02461-F1	A	S	541	0	-	2397	U	0	0	121	33.21	20	0	0.605	0.073	1	0	0	1	O	0.605
AF-P02461-F1	A	P	542	0	-	2397	U	0	0	132	45.25	20	0	0.66	0.243	1	0	0	1	O	0.66
AF-P02461-F1	A	G	543	0	-	2397	U	0	0	74	35.92	20	0	0.37	0.111	1	0	0	1	O	0.37
AF-P02461-F1	A	G	544	0	-	2397	U	0	0	67	38.41	20	0	0.335	0.146	1	0	0	1	O	0.335
AF-P02461-F1	A	P	545	0	-	2397	U	0	0	103	46.07	20	0	0.515	0.255	1	0	0	1	O	0.515
AF-P02461-F1	A	G	546	0	-	2397	U	0	0	34	41.07	20	0	0.17	0.184	1	0	0	1	O	0.17
AF-P02461-F1	A	S	547	0	-	2397	U	0	0	20	40.21	20	0	0.1	0.172	1	0	0	1	O	0.1
AF-P02461-F1	A	D	548	0	-	2397	U	0	0	42	39.91	20	0	0.21	0.167	1	0	0	1	O	0.21
AF-P02461-F1	A	G	549	0	-	2397	U	0	0	62	41.29	20	0	0.31	0.187	1	0	0	1	O	0.31
AF-P02461-F1	A	K	550	0	-	2397	U	0	0	200	40.23	20	0	1	0.172	1	0	0	1	O	1
AF-P02461-F1	A	P	551	0	-	2397	U	0	0	128	43.55	20	0	0.64	0.219	1	0	0	1	O	0.64
AF-P02461-F1	A	G	552	0	-	2397	U	0	0	68	46.62	20	0	0.34	0.262	1	0	0	1	O	0.34
AF-P02461-F1	A	P	553	0	-	2397	U	0	0	131	44.22	20	0	0.655	0.229	1	0	0	1	O	0.655
AF-P02461-F1	A	P	554	0	-	2397	U	0	0	128	44.97	20	0	0.64	0.239	1	0	0	1	O	0.64
AF-P02461-F1	A	G	555	0	-	2397	U	0	0	66	40.45	20	0	0.33	0.175	1	0	0	1	O	0.33
AF-P02461-F1	A	S	556	0	-	2397	U	0	0	124	35.3	20	0	0.62	0.102	1	0	0	1	O	0.62
AF-P02461-F1	A	Q	557	0	-	2397	U	0	0	195	39.01	20	0	0.975	0.155	1	0	0	1	O	0.975
AF-P02461-F1	A	G	558	0	-	2397	U	0	0	69	39.68	20	0	0.345	0.164	1	0	0	1	O	0.345
AF-P02461-F1	A	E	559	0	-	2397	U	0	0	187	31.18	20	0	0.935	0.044	1	0	0	1	O	0.935
AF-P02461-F1	A	S	560	0	-	2397	U	0	0	107	31.88	20	0	0.535	0.054	1	0	0	1	O	0.535
AF-P02461-F1	A	G	561	0	-	2397	U	0	0	82	33.56	20	0	0.41	0.078	1	0	0	1	O	0.41
AF-P02461-F1	A	R	562	0	-	2397	U	0	0	200	36.72	20	0	1	0.122	1	0	0	1	O	1
AF-P02461-F1	A	P	563	0	-	2397	U	0	0	132	39.53	20	0	0.66	0.162	1	0	0	1	O	0.66
AF-P02461-F1	A	G	564	0	-	2397	U	0	0	69	47.74	20	0	0.345	0.278	1	0	0	1	O	0.345
AF-P02461-F1	A	P	565	0	-	2397	U	0	0	129	43.45	20	0	0.645	0.218	1	0	0	1	O	0.645
AF-P02461-F1	A	P	566	0	-	2397	U	0	0	131	41.1	20	0	0.655	0.184	1	0	0	1	O	0.655
AF-P02461-F1	A	G	567	0	-	2397	U	0	0	67	45.63	20	0	0.335	0.248	1	0	0	1	O	0.335
AF-P02461-F1	A	P	568	0	-	2397	U	0	0	123	51.67	20	0	0.615	0.334	1	0	0	1	O	0.615
AF-P02461-F1	A	S	569	0	-	2397	U	0	0	123	39.65	20	0	0.615	0.164	1	0	0	1	O	0.615
AF-P02461-F1	A	G	570	0	-	2397	U	0	0	76	46.93	20	0	0.38	0.267	1	0	0	1	O	0.38
AF-P02461-F1	A	P	571	0	-	2397	U	0	0	128	41.94	20	0	0.64	0.196	1	0	0	1	O	0.64
AF-P02461-F1	A	R	572	0	-	2397	U	0	0	200	38.61	20	0	1	0.149	1	0	0	1	O	1
AF-P02461-F1	A	G	573	0	-	2397	U	0	0	71	42.49	20	0	0.355	0.204	1	0	0	1	O	0.355
AF-P02461-F1	A	Q	574	0	-	2397	U	0	0	185	33.97	20	0	0.925	0.083	1	0	0	1	O	0.925
AF-P02461-F1	A	P	575	0	-	2397	U	0	0	93	40.48	20	0	0.465	0.176	1	0	0	1	O	0.465
AF-P02461-F1	A	G	576	0	-	2397	U	0	0	45	37.09	20	0	0.225	0.128	1	0	0	1	O	0.225
AF-P02461-F1	A	V	577	0	-	2397	U	0	0	113	33.82	20	0	0.565	0.081	1	0	0	1	O	0.565
AF-P02461-F1	A	M	578	0	-	2397	U	0	0	187	32.5	20	0	0.935	0.063	1	0	0	1	O	0.935
AF-P02461-F1	A	G	579	0	-	2397	U	0	0	49	34.67	20	0	0.245	0.093	1	0	0	1	O	0.245
AF-P02461-F1	A	F	580	0	-	2397	U	0	0	200	30.87	20	0	1	0.04	1	0	0	1	O	1
AF-P02461-F1	A	P	581	0	-	2397	U	0	0	121	40.76	20	0	0.605	0.18	1	0	0	1	O	0.605
AF-P02461-F1	A	G	582	0	-	2397	U	0	0	65	46.04	20	0	0.325	0.254	1	0	0	1	O	0.325
AF-P02461-F1	A	P	583	0	-	2397	U	0	0	122	41.2	20	0	0.61	0.186	1	0	0	1	O	0.61
AF-P02461-F1	A	K	584	0	-	2397	U	0	0	187	36.63	20	0	0.935	0.121	1	0	0	1	O	0.935
AF-P02461-F1	A	G	585	0	-	2397	U	0	0	66	39.66	20	0	0.33	0.164	1	0	0	1	O	0.33
AF-P02461-F1	A	N	586	0	-	2397	S	0	0	149	28.08	20	0	0.745	0	1	0	0	1	O	0.745
AF-P02461-F1	A	D	587	0	-	2397	U	0	0	144	38.29	20	0	0.72	0.145	1	0	0	1	O	0.72
AF-P02461-F1	A	G	588	0	-	2397	U	0	0	53	37.95	20	0	0.265	0.14	1	0	0	1	O	0.265
AF-P02461-F1	A	A	589	0	-	2397	U	0	0	97	42.26	20	0	0.485	0.201	1	0	0	1	O	0.485
AF-P02461-F1	A	P	590	0	-	2397	U	0	0	119	44.54	20	0	0.595	0.233	1	0	0	1	O	0.595
AF-P02461-F1	A	G	591	0	-	2397	U	0	0	61	38.53	20	0	0.305	0.148	1	0	0	1	O	0.305
AF-P02461-F1	A	K	592	0	-	2397	U	0	0	200	46.64	20	0	1	0.263	1	0	0	1	O	1
AF-P02461-F1	A	N	593	0	-	2397	U	0	0	170	31.91	20	0	0.85	0.054	1	0	0	1	O	0.85
AF-P02461-F1	A	G	594	0	-	2397	U	0	0	59	35.6	20	0	0.295	0.106	1	0	0	1	O	0.295
AF-P02461-F1	A	E	595	0	-	2397	U	0	0	194	29.2	20	0	0.97	0.016	1	0	0	1	O	0.97
AF-P02461-F1	A	R	596	0	-	2397	U	0	0	200	39.52	20	0	1	0.162	1	0	0	1	O	1
AF-P02461-F1	A	G	597	0	-	2397	U	0	0	73	34.74	20	0	0.365	0.094	1	0	0	1	O	0.365
AF-P02461-F1	A	G	598	0	-	2397	U	0	0	74	37.14	20	0	0.37	0.128	1	0	0	1	O	0.37
AF-P02461-F1	A	P	599	0	-	2397	U	0	0	141	39.11	20	0	0.705	0.156	1	0	0	1	O	0.705
AF-P02461-F1	A	G	600	0	-	2397	U	0	0	79	32.31	20	0	0.395	0.06	1	0	0	1	O	0.395
AF-P02461-F1	A	G	601	0	-	2397	U	0	0	45	35.35	20	0	0.225	0.103	1	0	0	1	O	0.225
AF-P02461-F1	A	P	602	0	-	2397	U	0	0	100	39.9	20	0	0.5	0.167	1	0	0	1	O	0.5
AF-P02461-F1	A	G	603	0	-	2397	U	0	0	29	48.15	20	0	0.145	0.284	1	0	0	1	O	0.145
AF-P02461-F1	A	P	604	0	-	2397	U	0	0	84	40.59	20	0	0.42	0.177	1	0	0	1	O	0.42
AF-P02461-F1	A	Q	605	0	-	2397	U	0	0	151	36.58	20	0	0.755	0.12	1	0	0	1	O	0.755
AF-P02461-F1	A	G	606	0	-	2397	U	0	0	62	52.25	20	0	0.31	0.342	1	0	0	1	O	0.31
AF-P02461-F1	A	P	607	0	-	2397	U	0	0	127	36.78	20	0	0.635	0.123	1	0	0	1	O	0.635
AF-P02461-F1	A	P	608	0	-	2397	U	0	0	129	39.81	20	0	0.645	0.166	1	0	0	1	O	0.645
AF-P02461-F1	A	G	609	1	M10.013|M10.004	2397	U	0	0	68	36.09	20	0	0.34	0.113	1	0	0	1	O	0.34
AF-P02461-F1	A	K	610	0	-	2397	U	0	0	200	29.06	20	0	1	0.014	1	0	0	1	O	1
AF-P02461-F1	A	N	611	0	-	2397	U	0	0	167	31.57	20	0	0.835	0.049	1	0	0	1	O	0.835
AF-P02461-F1	A	G	612	0	-	2397	U	0	0	63	34.91	20	0	0.315	0.097	1	0	0	1	O	0.315
AF-P02461-F1	A	E	613	0	-	2397	U	0	0	192	32.8	20	0	0.96	0.067	1	0	0	1	O	0.96
AF-P02461-F1	A	T	614	0	-	2397	U	0	0	145	38.78	20	0	0.725	0.151	1	0	0	1	O	0.725
AF-P02461-F1	A	G	615	0	-	2397	U	0	0	60	48.3	20	0	0.3	0.286	1	0	0	1	O	0.3
AF-P02461-F1	A	P	616	0	-	2397	U	0	0	127	41.25	20	0	0.635	0.186	1	0	0	1	O	0.635
AF-P02461-F1	A	Q	617	0	-	2397	U	0	0	189	37.97	20	0	0.945	0.14	1	0	0	1	O	0.945
AF-P02461-F1	A	G	618	0	-	2397	U	0	0	62	41.86	20	0	0.31	0.195	1	0	0	1	O	0.31
AF-P02461-F1	A	P	619	0	-	2397	U	0	0	127	35.99	20	0	0.635	0.112	1	0	0	1	O	0.635
AF-P02461-F1	A	P	620	0	-	2397	U	0	0	124	40.24	20	0	0.62	0.172	1	0	0	1	O	0.62
AF-P02461-F1	A	G	621	0	-	2397	U	0	0	42	50.26	20	0	0.21	0.314	1	0	0	1	O	0.21
AF-P02461-F1	A	P	622	0	-	2397	U	0	0	55	36.29	20	0	0.275	0.116	1	0	0	1	O	0.275
AF-P02461-F1	A	T	623	0	-	2397	U	0	0	84	34.74	20	0	0.42	0.094	1	0	0	1	O	0.42
AF-P02461-F1	A	G	624	0	-	2397	U	0	0	74	34.94	20	0	0.37	0.097	1	0	0	1	O	0.37
AF-P02461-F1	A	P	625	0	-	2397	U	0	0	135	36.88	20	0	0.675	0.125	1	0	0	1	O	0.675
AF-P02461-F1	A	G	626	0	-	2397	U	0	0	77	42.24	20	0	0.385	0.2	1	0	0	1	O	0.385
AF-P02461-F1	A	G	627	0	-	2397	U	0	0	62	39.09	20	0	0.31	0.156	1	0	0	1	O	0.31
AF-P02461-F1	A	D	628	0	-	2397	U	0	0	158	29.7	20	0	0.79	0.023	1	0	0	1	O	0.79
AF-P02461-F1	A	K	629	0	-	2397	U	0	0	190	31.25	20	0	0.95	0.045	1	0	0	1	O	0.95
AF-P02461-F1	A	G	630	0	-	2397	U	0	0	58	38.6	20	0	0.29	0.149	1	0	0	1	O	0.29
AF-P02461-F1	A	D	631	0	-	2397	U	0	0	155	33.24	20	0	0.775	0.073	1	0	0	1	O	0.775
AF-P02461-F1	A	T	632	0	-	2397	U	0	0	143	39.74	20	0	0.715	0.165	1	0	0	1	O	0.715
AF-P02461-F1	A	G	633	0	-	2397	U	0	0	61	38.99	20	0	0.305	0.154	1	0	0	1	O	0.305
AF-P02461-F1	A	P	634	0	-	2397	U	0	0	126	45.74	20	0	0.63	0.25	1	0	0	1	O	0.63
AF-P02461-F1	A	P	635	0	-	2397	U	0	0	118	37.88	20	0	0.59	0.139	1	0	0	1	O	0.59
AF-P02461-F1	A	G	636	0	-	2397	U	0	0	81	38.69	20	0	0.405	0.15	1	0	0	1	O	0.405
AF-P02461-F1	A	P	637	0	-	2397	U	0	0	112	39.36	20	0	0.56	0.16	1	0	0	1	O	0.56
AF-P02461-F1	A	Q	638	0	-	2397	U	0	0	158	32.47	20	0	0.79	0.062	1	0	0	1	O	0.79
AF-P02461-F1	A	G	639	1	M10.013|M10.004|M10.019	2397	U	0	0	68	34.94	20	0	0.34	0.097	1	0	0	1	O	0.34
AF-P02461-F1	A	L	640	0	-	2397	U	0	0	178	30.22	20	0	0.89	0.03	1	0	0	1	O	0.89
AF-P02461-F1	A	Q	641	0	-	2397	U	0	0	200	36.31	20	0	1	0.117	1	0	0	1	O	1
AF-P02461-F1	A	G	642	0	-	2397	U	0	0	68	37.08	20	0	0.34	0.127	1	0	0	1	O	0.34
AF-P02461-F1	A	L	643	0	-	2397	U	0	0	133	32.6	20	0	0.665	0.064	1	0	0	1	O	0.665
AF-P02461-F1	A	P	644	0	-	2397	U	0	0	110	41.5	20	0	0.55	0.19	1	0	0	1	O	0.55
AF-P02461-F1	A	G	645	0	-	2397	U	0	0	43	39.55	20	0	0.215	0.162	1	0	0	1	O	0.215
AF-P02461-F1	A	T	646	0	-	2397	U	0	0	145	32.62	20	0	0.725	0.064	1	0	0	1	O	0.725
AF-P02461-F1	A	G	647	0	-	2397	U	0	0	86	46.26	20	0	0.43	0.257	1	0	0	1	O	0.43
AF-P02461-F1	A	G	648	0	-	2397	U	0	0	71	38.98	20	0	0.355	0.154	1	0	0	1	O	0.355
AF-P02461-F1	A	P	649	0	-	2397	U	0	0	130	39.93	20	0	0.65	0.168	1	0	0	1	O	0.65
AF-P02461-F1	A	P	650	0	-	2397	U	0	0	127	52.29	20	0	0.635	0.343	1	0	0	1	O	0.635
AF-P02461-F1	A	G	651	0	-	2397	U	0	0	68	39.48	20	0	0.34	0.161	1	0	0	1	O	0.34
AF-P02461-F1	A	E	652	0	-	2397	U	0	0	190	36.47	20	0	0.95	0.119	1	0	0	1	O	0.95
AF-P02461-F1	A	N	653	0	-	2397	U	0	0	106	35.85	20	0	0.53	0.11	1	0	0	1	O	0.53
AF-P02461-F1	A	G	654	0	-	2397	U	0	0	67	40.37	20	0	0.335	0.174	1	0	0	1	O	0.335
AF-P02461-F1	A	K	655	0	-	2397	U	0	0	200	33.38	20	0	1	0.075	1	0	0	1	O	1
AF-P02461-F1	A	P	656	0	-	2397	U	0	0	130	48.27	20	0	0.65	0.286	1	0	0	1	O	0.65
AF-P02461-F1	A	G	657	0	-	2397	U	0	0	64	35.47	20	0	0.32	0.105	1	0	0	1	O	0.32
AF-P02461-F1	A	E	658	0	-	2397	U	0	0	190	33.09	20	0	0.95	0.071	1	0	0	1	O	0.95
AF-P02461-F1	A	P	659	0	-	2397	U	0	0	118	39.67	20	0	0.59	0.164	1	0	0	1	O	0.59
AF-P02461-F1	A	G	660	0	-	2397	U	0	0	71	45.05	20	0	0.355	0.24	1	0	0	1	O	0.355
AF-P02461-F1	A	P	661	0	-	2397	U	0	0	141	39.97	20	0	0.705	0.168	1	0	0	1	O	0.705
AF-P02461-F1	A	K	662	0	-	2397	U	0	0	189	46.75	20	0	0.945	0.264	1	0	0	1	O	0.945
AF-P02461-F1	A	G	663	0	-	2397	U	0	0	66	43.62	20	0	0.33	0.22	1	0	0	1	O	0.33
AF-P02461-F1	A	D	664	0	-	2397	U	0	0	139	36.61	20	0	0.695	0.121	1	0	0	1	O	0.695
AF-P02461-F1	A	A	665	0	-	2397	U	0	0	100	40.34	20	0	0.5	0.174	1	0	0	1	O	0.5
AF-P02461-F1	A	G	666	0	-	2397	U	0	0	76	37.61	20	0	0.38	0.135	1	0	0	1	O	0.38
AF-P02461-F1	A	A	667	0	-	2397	U	0	0	100	38.87	20	0	0.5	0.153	1	0	0	1	O	0.5
AF-P02461-F1	A	P	668	0	-	2397	U	0	0	132	44.19	20	0	0.66	0.228	1	0	0	1	O	0.66
AF-P02461-F1	A	G	669	0	-	2397	U	0	0	77	37.09	20	0	0.385	0.128	1	0	0	1	O	0.385
AF-P02461-F1	A	A	670	0	-	2397	U	0	0	100	35.37	20	0	0.5	0.103	1	0	0	1	O	0.5
AF-P02461-F1	A	P	671	0	-	2397	U	0	0	130	43.04	20	0	0.65	0.212	1	0	0	1	O	0.65
AF-P02461-F1	A	G	672	0	-	2397	U	0	0	82	33.28	20	0	0.41	0.074	1	0	0	1	O	0.41
AF-P02461-F1	A	G	673	0	-	2397	U	0	0	85	38.04	20	0	0.425	0.141	1	0	0	1	O	0.425
AF-P02461-F1	A	K	674	0	-	2397	U	0	0	199	37.55	20	0	0.995	0.134	1	0	0	1	O	0.995
AF-P02461-F1	A	G	675	0	-	2397	U	0	0	56	38.63	20	0	0.28	0.149	1	0	0	1	O	0.28
AF-P02461-F1	A	D	676	0	-	2397	U	0	0	159	32.63	20	0	0.795	0.064	1	0	0	1	O	0.795
AF-P02461-F1	A	A	677	0	-	2397	U	0	0	108	42.56	20	0	0.54	0.205	1	0	0	1	O	0.54
AF-P02461-F1	A	G	678	0	-	2397	U	0	0	79	36.15	20	0	0.395	0.114	1	0	0	1	O	0.395
AF-P02461-F1	A	A	679	0	-	2397	U	0	0	100	31.34	20	0	0.5	0.046	1	0	0	1	O	0.5
AF-P02461-F1	A	P	680	0	-	2397	U	0	0	138	52.52	20	0	0.69	0.346	1	0	0	1	O	0.69
AF-P02461-F1	A	G	681	0	-	2397	U	0	0	72	33.48	20	0	0.36	0.076	1	0	0	1	O	0.36
AF-P02461-F1	A	E	682	0	-	2397	U	0	0	200	36.33	20	0	1	0.117	1	0	0	1	O	1
AF-P02461-F1	A	R	683	0	-	2397	U	0	0	200	30.64	20	0	1	0.036	1	0	0	1	O	1
AF-P02461-F1	A	G	684	0	-	2397	U	0	0	65	37.78	20	0	0.325	0.137	1	0	0	1	O	0.325
AF-P02461-F1	A	P	685	0	-	2397	U	0	0	128	40.72	20	0	0.64	0.179	1	0	0	1	O	0.64
AF-P02461-F1	A	P	686	0	-	2397	U	0	0	123	42.63	20	0	0.615	0.206	1	0	0	1	O	0.615
AF-P02461-F1	A	G	687	0	-	2397	U	0	0	72	34.59	20	0	0.36	0.092	1	0	0	1	O	0.36
AF-P02461-F1	A	L	688	0	-	2397	U	0	0	177	34.89	20	0	0.885	0.096	1	0	0	1	O	0.885
AF-P02461-F1	A	A	689	0	-	2397	U	0	0	103	36.81	20	0	0.515	0.124	1	0	0	1	O	0.515
AF-P02461-F1	A	G	690	0	-	2397	U	0	0	77	41.81	20	0	0.385	0.194	1	0	0	1	O	0.385
AF-P02461-F1	A	A	691	0	-	2397	U	0	0	99	36.68	20	0	0.495	0.122	1	0	0	1	O	0.495
AF-P02461-F1	A	P	692	0	-	2397	U	0	0	134	48.93	20	0	0.67	0.295	1	0	0	1	O	0.67
AF-P02461-F1	A	G	693	1	M10.013|M10.004	2397	U	0	0	61	39.87	20	0	0.305	0.167	1	0	0	1	O	0.305
AF-P02461-F1	A	L	694	0	-	2397	U	0	0	129	37.49	20	0	0.645	0.133	1	0	0	1	O	0.645
AF-P02461-F1	A	R	695	0	-	2397	U	0	0	142	36.94	20	0	0.71	0.125	1	0	0	1	O	0.71
AF-P02461-F1	A	G	696	0	-	2397	U	0	0	37	40.77	20	0	0.185	0.18	1	0	0	1	O	0.185
AF-P02461-F1	A	G	697	0	-	2397	U	0	0	78	38.29	20	0	0.39	0.145	1	0	0	1	O	0.39
AF-P02461-F1	A	A	698	0	-	2397	U	0	0	109	38.36	20	0	0.545	0.146	1	0	0	1	O	0.545
AF-P02461-F1	A	G	699	0	-	2397	U	0	0	73	46.01	20	0	0.365	0.254	1	0	0	1	O	0.365
AF-P02461-F1	A	P	700	0	-	2397	U	0	0	123	38.51	20	0	0.615	0.148	1	0	0	1	O	0.615
AF-P02461-F1	A	P	701	0	-	2397	U	0	0	128	48.17	20	0	0.64	0.284	1	0	0	1	O	0.64
AF-P02461-F1	A	G	702	0	-	2397	U	0	0	75	48.53	20	0	0.375	0.29	1	0	0	1	O	0.375
AF-P02461-F1	A	P	703	0	-	2397	U	0	0	128	38.16	20	0	0.64	0.143	1	0	0	1	O	0.64
AF-P02461-F1	A	E	704	0	-	2397	U	0	0	187	36.49	20	0	0.935	0.119	1	0	0	1	O	0.935
AF-P02461-F1	A	G	705	0	-	2397	U	0	0	84	44.24	20	0	0.42	0.229	1	0	0	1	O	0.42
AF-P02461-F1	A	G	706	0	-	2397	U	0	0	59	39.61	20	0	0.295	0.163	1	0	0	1	O	0.295
AF-P02461-F1	A	K	707	0	-	2397	U	0	0	200	33.1	20	0	1	0.071	1	0	0	1	O	1
AF-P02461-F1	A	G	708	0	-	2397	U	0	0	72	37.05	20	0	0.36	0.127	1	0	0	1	O	0.36
AF-P02461-F1	A	A	709	0	-	2397	U	0	0	110	32.52	20	0	0.55	0.063	1	0	0	1	O	0.55
AF-P02461-F1	A	A	710	0	-	2397	U	0	0	97	34.08	20	0	0.485	0.085	1	0	0	1	O	0.485
AF-P02461-F1	A	G	711	0	-	2397	U	0	0	70	52.5	20	0	0.35	0.346	1	0	0	1	O	0.35
AF-P02461-F1	A	P	712	0	-	2397	U	0	0	132	47.1	20	0	0.66	0.269	1	0	0	1	O	0.66
AF-P02461-F1	A	P	713	0	-	2397	U	0	0	127	37.87	20	0	0.635	0.139	1	0	0	1	O	0.635
AF-P02461-F1	A	G	714	0	-	2397	U	0	0	64	49.53	20	0	0.32	0.304	1	0	0	1	O	0.32
AF-P02461-F1	A	P	715	0	-	2397	U	0	0	134	43.4	20	0	0.67	0.217	1	0	0	1	O	0.67
AF-P02461-F1	A	P	716	0	-	2397	U	0	0	124	37.9	20	0	0.62	0.139	1	0	0	1	O	0.62
AF-P02461-F1	A	G	717	1	M10.004|M10.013	2397	U	0	0	80	34.38	20	0	0.4	0.089	1	0	0	1	O	0.4
AF-P02461-F1	A	A	718	0	-	2397	U	0	0	99	35.22	20	0	0.495	0.101	1	0	0	1	O	0.495
AF-P02461-F1	A	A	719	0	-	2397	U	0	0	104	34.18	20	0	0.52	0.086	1	0	0	1	O	0.52
AF-P02461-F1	A	G	720	0	-	2397	U	0	0	71	33.22	20	0	0.355	0.073	1	0	0	1	O	0.355
AF-P02461-F1	A	T	721	0	-	2397	U	0	0	139	34.96	20	0	0.695	0.097	1	0	0	1	O	0.695
AF-P02461-F1	A	P	722	0	-	2397	U	0	0	131	48.58	20	0	0.655	0.29	1	0	0	1	O	0.655
AF-P02461-F1	A	G	723	0	-	2397	U	0	0	70	33.07	20	0	0.35	0.071	1	0	0	1	O	0.35
AF-P02461-F1	A	L	724	0	-	2397	U	0	0	158	34.2	20	0	0.79	0.087	1	0	0	1	O	0.79
AF-P02461-F1	A	Q	725	0	-	2397	U	0	0	189	34.84	20	0	0.945	0.096	1	0	0	1	O	0.945
AF-P02461-F1	A	G	726	0	-	2397	U	0	0	74	36.14	20	0	0.37	0.114	1	0	0	1	O	0.37
AF-P02461-F1	A	M	727	0	-	2397	U	0	0	187	37.65	20	0	0.935	0.135	1	0	0	1	O	0.935
AF-P02461-F1	A	P	728	0	-	2397	U	0	0	130	41.5	20	0	0.65	0.19	1	0	0	1	O	0.65
AF-P02461-F1	A	G	729	0	-	2397	U	0	0	79	35.98	20	0	0.395	0.112	1	0	0	1	O	0.395
AF-P02461-F1	A	E	730	0	-	2397	U	0	0	158	31.83	20	0	0.79	0.053	1	0	0	1	O	0.79
AF-P02461-F1	A	R	731	0	-	2397	U	0	0	152	38.22	20	0	0.76	0.144	1	0	0	1	O	0.76
AF-P02461-F1	A	G	732	0	-	2397	U	0	0	81	41.54	20	0	0.405	0.191	1	0	0	1	O	0.405
AF-P02461-F1	A	G	733	0	-	2397	U	0	0	44	36.17	20	0	0.22	0.115	1	0	0	1	O	0.22
AF-P02461-F1	A	L	734	0	-	2397	U	0	0	111	44.91	20	0	0.555	0.238	1	0	0	1	O	0.555
AF-P02461-F1	A	G	735	0	-	2397	U	0	0	84	38.37	20	0	0.42	0.146	1	0	0	1	O	0.42
AF-P02461-F1	A	S	736	0	-	2397	U	0	0	81	42.9	20	0	0.405	0.21	1	0	0	1	O	0.405
AF-P02461-F1	A	P	737	0	-	2397	U	0	0	122	44.22	20	0	0.61	0.229	1	0	0	1	O	0.61
AF-P02461-F1	A	G	738	0	-	2397	U	0	0	75	35.18	20	0	0.375	0.101	1	0	0	1	O	0.375
AF-P02461-F1	A	P	739	0	-	2397	U	0	0	131	40.17	20	0	0.655	0.171	1	0	0	1	O	0.655
AF-P02461-F1	A	K	740	0	-	2397	U	0	0	166	41.98	20	0	0.83	0.197	1	0	0	1	O	0.83
AF-P02461-F1	A	G	741	1	M12.221|M10.004|M10.002|M10.009|M10.013	2397	U	0	0	75	46.66	20	0	0.375	0.263	1	0	0	1	O	0.375
AF-P02461-F1	A	D	742	0	-	2397	U	0	0	122	32.73	20	0	0.61	0.066	1	0	0	1	O	0.61
AF-P02461-F1	A	K	743	0	-	2397	U	0	0	200	34.05	20	0	1	0.085	1	0	0	1	O	1
AF-P02461-F1	A	G	744	0	-	2397	U	0	0	80	42.4	20	0	0.4	0.203	1	0	0	1	O	0.4
AF-P02461-F1	A	E	745	0	-	2397	U	0	0	186	36.56	20	0	0.93	0.12	1	0	0	1	O	0.93
AF-P02461-F1	A	P	746	0	-	2397	U	0	0	123	41.4	20	0	0.615	0.189	1	0	0	1	O	0.615
AF-P02461-F1	A	G	747	0	-	2397	U	0	0	83	41.14	20	0	0.415	0.185	1	0	0	1	O	0.415
AF-P02461-F1	A	G	748	0	-	2397	U	0	0	59	42.66	20	0	0.295	0.206	1	0	0	1	O	0.295
AF-P02461-F1	A	P	749	0	-	2397	U	0	0	103	48.83	20	0	0.515	0.294	1	0	0	1	O	0.515
AF-P02461-F1	A	G	750	0	-	2397	U	0	0	50	40.63	20	0	0.25	0.178	1	0	0	1	O	0.25
AF-P02461-F1	A	A	751	0	-	2397	U	0	0	80	42.47	20	0	0.4	0.204	1	0	0	1	O	0.4
AF-P02461-F1	A	D	752	0	-	2397	U	0	0	130	44.69	20	0	0.65	0.235	1	0	0	1	O	0.65
AF-P02461-F1	A	G	753	0	-	2397	U	0	0	63	40.84	20	0	0.315	0.181	1	0	0	1	O	0.315
AF-P02461-F1	A	V	754	0	-	2397	U	0	0	125	36.41	20	0	0.625	0.118	1	0	0	1	O	0.625
AF-P02461-F1	A	P	755	0	-	2397	U	0	0	121	40.92	20	0	0.605	0.182	1	0	0	1	O	0.605
AF-P02461-F1	A	G	756	0	-	2397	U	0	0	63	39.79	20	0	0.315	0.166	1	0	0	1	O	0.315
AF-P02461-F1	A	K	757	0	-	2397	U	0	0	179	30.47	20	0	0.895	0.034	1	0	0	1	O	0.895
AF-P02461-F1	A	D	758	0	-	2397	U	0	0	151	38.64	20	0	0.755	0.15	1	0	0	1	O	0.755
AF-P02461-F1	A	G	759	0	-	2397	U	0	0	67	36.77	20	0	0.335	0.123	1	0	0	1	O	0.335
AF-P02461-F1	A	P	760	0	-	2397	U	0	0	130	49.37	20	0	0.65	0.301	1	0	0	1	O	0.65
AF-P02461-F1	A	R	761	0	-	2397	U	0	0	200	40.06	20	0	1	0.17	1	0	0	1	O	1
AF-P02461-F1	A	G	762	0	-	2397	U	0	0	60	40.73	20	0	0.3	0.179	1	0	0	1	O	0.3
AF-P02461-F1	A	P	763	0	-	2397	S	0	0	124	48.6	20	0	0.62	0.291	1	0	0	1	O	0.62
AF-P02461-F1	A	T	764	0	-	2397	U	0	0	138	32.98	20	0	0.69	0.069	1	0	0	1	O	0.69
AF-P02461-F1	A	G	765	0	-	2397	U	0	0	64	39.87	20	0	0.32	0.167	1	0	0	1	O	0.32
AF-P02461-F1	A	P	766	0	-	2397	U	0	0	120	48.62	20	0	0.6	0.291	1	0	0	1	O	0.6
AF-P02461-F1	A	I	767	0	-	2397	U	0	0	166	34.35	20	0	0.83	0.089	1	0	0	1	O	0.83
AF-P02461-F1	A	G	768	0	-	2397	U	0	0	61	50.27	20	0	0.305	0.314	1	0	0	1	O	0.305
AF-P02461-F1	A	P	769	0	-	2397	U	0	0	127	46.52	20	0	0.635	0.261	1	0	0	1	O	0.635
AF-P02461-F1	A	P	770	0	-	2397	U	0	0	124	43.75	20	0	0.62	0.222	1	0	0	1	O	0.62
AF-P02461-F1	A	G	771	0	-	2397	U	0	0	63	35.67	20	0	0.315	0.107	1	0	0	1	O	0.315
AF-P02461-F1	A	P	772	0	-	2397	U	0	0	129	34.88	20	0	0.645	0.096	1	0	0	1	O	0.645
AF-P02461-F1	A	A	773	0	-	2397	U	0	0	97	40.11	20	0	0.485	0.17	1	0	0	1	O	0.485
AF-P02461-F1	A	G	774	1	M10.004|M12.221|M10.013|M10.009|M10.002	2397	U	0	0	76	35.7	20	0	0.38	0.108	1	0	0	1	O	0.38
AF-P02461-F1	A	Q	775	0	-	2397	U	0	0	193	37.53	20	0	0.965	0.134	1	0	0	1	O	0.965
AF-P02461-F1	A	P	776	0	-	2397	U	0	0	134	39.89	20	0	0.67	0.167	1	0	0	1	O	0.67
AF-P02461-F1	A	G	777	0	-	2397	U	0	0	72	43.26	20	0	0.36	0.215	1	0	0	1	O	0.36
AF-P02461-F1	A	D	778	0	-	2397	U	0	0	158	33.61	20	0	0.79	0.078	1	0	0	1	O	0.79
AF-P02461-F1	A	K	779	0	-	2397	U	0	0	200	40.97	20	0	1	0.183	1	0	0	1	O	1
AF-P02461-F1	A	G	780	0	-	2397	U	0	0	74	45.71	20	0	0.37	0.25	1	0	0	1	O	0.37
AF-P02461-F1	A	E	781	0	-	2397	U	0	0	200	30.03	20	0	1	0.028	1	0	0	1	O	1
AF-P02461-F1	A	G	782	0	-	2397	U	0	0	84	41.99	20	0	0.42	0.197	1	0	0	1	O	0.42
AF-P02461-F1	A	G	783	0	-	2397	U	0	0	67	38.69	20	0	0.335	0.15	1	0	0	1	O	0.335
AF-P02461-F1	A	A	784	0	-	2397	U	0	0	99	38.11	20	0	0.495	0.142	1	0	0	1	O	0.495
AF-P02461-F1	A	P	785	0	-	2397	U	0	0	130	39.97	20	0	0.65	0.168	1	0	0	1	O	0.65
AF-P02461-F1	A	G	786	0	-	2397	U	0	0	77	39.63	20	0	0.385	0.164	1	0	0	1	O	0.385
AF-P02461-F1	A	L	787	0	-	2397	U	0	0	167	29.96	20	0	0.835	0.027	1	0	0	1	O	0.835
AF-P02461-F1	A	P	788	0	-	2397	U	0	0	127	45.58	20	0	0.635	0.248	1	0	0	1	O	0.635
AF-P02461-F1	A	G	789	0	-	2397	U	0	0	71	39.12	20	0	0.355	0.156	1	0	0	1	O	0.355
AF-P02461-F1	A	I	790	0	-	2397	U	0	0	175	39.25	20	0	0.875	0.158	1	0	0	1	O	0.875
AF-P02461-F1	A	A	791	0	-	2397	U	0	0	106	36.91	20	0	0.53	0.125	1	0	0	1	O	0.53
AF-P02461-F1	A	G	792	0	-	2397	U	0	0	71	41.22	20	0	0.355	0.186	1	0	0	1	O	0.355
AF-P02461-F1	A	P	793	0	-	2397	U	0	0	126	47.17	20	0	0.63	0.27	1	0	0	1	O	0.63
AF-P02461-F1	A	R	794	0	-	2397	U	0	0	200	41.61	20	0	1	0.192	1	0	0	1	O	1
AF-P02461-F1	A	G	795	0	-	2397	U	0	0	77	47.05	20	0	0.385	0.269	1	0	0	1	O	0.385
AF-P02461-F1	A	S	796	0	-	2397	U	0	0	119	41.61	20	0	0.595	0.192	1	0	0	1	O	0.595
AF-P02461-F1	A	P	797	0	-	2397	U	0	0	136	47.38	20	0	0.68	0.273	1	0	0	1	O	0.68
AF-P02461-F1	A	G	798	0	-	2397	U	0	0	75	36.55	20	0	0.375	0.12	1	0	0	1	O	0.375
AF-P02461-F1	A	E	799	0	-	2397	U	0	0	200	39.76	20	0	1	0.165	1	0	0	1	O	1
AF-P02461-F1	A	R	800	0	-	2397	U	0	0	200	41.85	20	0	1	0.195	1	0	0	1	O	1
AF-P02461-F1	A	G	801	0	-	2397	U	0	0	75	45.25	20	0	0.375	0.243	1	0	0	1	O	0.375
AF-P02461-F1	A	E	802	0	-	2397	U	0	0	188	39.91	20	0	0.94	0.167	1	0	0	1	O	0.94
AF-P02461-F1	A	T	803	0	-	2397	U	0	0	138	41.29	20	0	0.69	0.187	1	0	0	1	O	0.69
AF-P02461-F1	A	G	804	0	-	2397	U	0	0	57	49.41	20	0	0.285	0.302	1	0	0	1	O	0.285
AF-P02461-F1	A	P	805	0	-	2397	U	0	0	119	50.03	20	0	0.595	0.311	1	0	0	1	O	0.595
AF-P02461-F1	A	P	806	0	-	2397	U	0	0	124	66.49	20	0	0.62	0.544	1	0	0	1	O	0.62
AF-P02461-F1	A	G	807	0	-	2397	U	0	0	66	50.61	20	0	0.33	0.319	1	0	0	1	O	0.33
AF-P02461-F1	A	P	808	0	-	2397	U	0	0	132	48.15	20	0	0.66	0.284	1	0	0	1	O	0.66
AF-P02461-F1	A	A	809	0	-	2397	U	0	0	93	49.83	20	0	0.465	0.308	1	0	0	1	O	0.465
AF-P02461-F1	A	G	810	0	-	2397	U	0	0	70	45.66	20	0	0.35	0.249	1	0	0	1	O	0.35
AF-P02461-F1	A	F	811	0	-	2397	U	0	0	200	35.39	20	0	1	0.103	1	0	0	1	O	1
AF-P02461-F1	A	P	812	0	-	2397	U	0	0	121	56.28	20	0	0.605	0.399	1	0	0	1	O	0.605
AF-P02461-F1	A	G	813	0	-	2397	U	0	0	68	44.35	20	0	0.34	0.23	1	0	0	1	O	0.34
AF-P02461-F1	A	A	814	0	-	2397	U	0	0	103	38.24	20	0	0.515	0.144	1	0	0	1	O	0.515
AF-P02461-F1	A	P	815	0	-	2397	U	0	0	126	49.66	20	0	0.63	0.306	1	0	0	1	O	0.63
AF-P02461-F1	A	G	816	0	-	2397	U	0	0	77	47.53	20	0	0.385	0.275	1	0	0	1	O	0.385
AF-P02461-F1	A	Q	817	0	-	2397	U	0	0	182	30.2	20	0	0.91	0.03	1	0	0	1	O	0.91
AF-P02461-F1	A	N	818	0	-	2397	U	0	0	162	30.23	20	0	0.81	0.03	1	0	0	1	O	0.81
AF-P02461-F1	A	G	819	0	-	2397	U	0	0	78	41.24	20	0	0.39	0.186	1	0	0	1	O	0.39
AF-P02461-F1	A	E	820	0	-	2397	U	0	0	188	30.32	20	0	0.94	0.032	1	0	0	1	O	0.94
AF-P02461-F1	A	P	821	0	-	2397	U	0	0	120	46.16	20	0	0.6	0.256	1	0	0	1	O	0.6
AF-P02461-F1	A	G	822	0	-	2397	U	0	0	84	33.57	20	0	0.42	0.078	1	0	0	1	O	0.42
AF-P02461-F1	A	G	823	0	-	2397	U	0	0	85	37.11	20	0	0.425	0.128	1	0	0	1	O	0.425
AF-P02461-F1	A	K	824	0	-	2397	U	0	0	200	39.06	20	0	1	0.155	1	0	0	1	O	1
AF-P02461-F1	A	G	825	0	-	2397	U	0	0	65	41.36	20	0	0.325	0.188	1	0	0	1	O	0.325
AF-P02461-F1	A	E	826	0	-	2397	U	0	0	142	35.5	20	0	0.71	0.105	1	0	0	1	O	0.71
AF-P02461-F1	A	R	827	0	-	2397	U	0	0	200	39.85	20	0	1	0.167	1	0	0	1	O	1
AF-P02461-F1	A	G	828	0	-	2397	U	0	0	69	40.45	20	0	0.345	0.175	1	0	0	1	O	0.345
AF-P02461-F1	A	A	829	0	-	2397	U	0	0	101	39.11	20	0	0.505	0.156	1	0	0	1	O	0.505
AF-P02461-F1	A	P	830	0	-	2397	U	0	0	127	44.06	20	0	0.635	0.226	1	0	0	1	O	0.635
AF-P02461-F1	A	G	831	0	-	2397	U	0	0	72	38.21	20	0	0.36	0.143	1	0	0	1	O	0.36
AF-P02461-F1	A	E	832	0	-	2397	U	0	0	200	39.59	20	0	1	0.163	1	0	0	1	O	1
AF-P02461-F1	A	K	833	0	-	2397	U	0	0	200	37.54	20	0	1	0.134	1	0	0	1	O	1
AF-P02461-F1	A	G	834	0	-	2397	U	0	0	68	38.74	20	0	0.34	0.151	1	0	0	1	O	0.34
AF-P02461-F1	A	E	835	0	-	2397	U	0	0	200	36.11	20	0	1	0.114	1	0	0	1	O	1
AF-P02461-F1	A	G	836	0	-	2397	U	0	0	85	38.54	20	0	0.425	0.148	1	0	0	1	O	0.425
AF-P02461-F1	A	G	837	0	-	2397	U	0	0	67	40.57	20	0	0.335	0.177	1	0	0	1	O	0.335
AF-P02461-F1	A	P	838	0	-	2397	U	0	0	128	44.2	20	0	0.64	0.228	1	0	0	1	O	0.64
AF-P02461-F1	A	P	839	0	-	2397	U	0	0	121	48.88	20	0	0.605	0.294	1	0	0	1	O	0.605
AF-P02461-F1	A	G	840	1	M10.013|M10.004	2397	U	0	0	77	43.83	20	0	0.385	0.223	1	0	0	1	O	0.385
AF-P02461-F1	A	V	841	0	-	2397	U	0	0	154	42.82	20	0	0.77	0.209	1	0	0	1	O	0.77
AF-P02461-F1	A	A	842	0	-	2397	U	0	0	103	39.39	20	0	0.515	0.16	1	0	0	1	O	0.515
AF-P02461-F1	A	G	843	0	-	2397	U	0	0	70	40.53	20	0	0.35	0.176	1	0	0	1	O	0.35
AF-P02461-F1	A	P	844	0	-	2397	U	0	0	128	43.29	20	0	0.64	0.215	1	0	0	1	O	0.64
AF-P02461-F1	A	P	845	0	-	2397	U	0	0	135	46.36	20	0	0.675	0.259	1	0	0	1	O	0.675
AF-P02461-F1	A	G	846	0	-	2397	U	0	0	85	35.22	20	0	0.425	0.101	1	0	0	1	O	0.425
AF-P02461-F1	A	G	847	0	-	2397	U	0	0	83	43.16	20	0	0.415	0.214	1	0	0	1	O	0.415
AF-P02461-F1	A	S	848	0	-	2397	U	0	0	119	40.25	20	0	0.595	0.172	1	0	0	1	O	0.595
AF-P02461-F1	A	G	849	0	-	2397	U	0	0	75	40.95	20	0	0.375	0.182	1	0	0	1	O	0.375
AF-P02461-F1	A	P	850	0	-	2397	U	0	0	135	47.73	20	0	0.675	0.278	1	0	0	1	O	0.675
AF-P02461-F1	A	A	851	0	-	2397	U	0	0	97	43.32	20	0	0.485	0.216	1	0	0	1	O	0.485
AF-P02461-F1	A	G	852	0	-	2397	U	0	0	71	47.06	20	0	0.355	0.269	1	0	0	1	O	0.355
AF-P02461-F1	A	P	853	0	-	2397	U	0	0	122	55.59	20	0	0.61	0.389	1	0	0	1	O	0.61
AF-P02461-F1	A	P	854	0	-	2397	U	0	0	128	40.78	20	0	0.64	0.18	1	0	0	1	O	0.64
AF-P02461-F1	A	G	855	0	-	2397	U	0	0	70	43.53	20	0	0.35	0.219	1	0	0	1	O	0.35
AF-P02461-F1	A	P	856	0	-	2397	U	0	0	118	42.55	20	0	0.59	0.205	1	0	0	1	O	0.59
AF-P02461-F1	A	Q	857	0	-	2397	U	0	0	170	41.92	20	0	0.85	0.196	1	0	0	1	O	0.85
AF-P02461-F1	A	G	858	1	M10.013|M10.004	2397	U	0	0	69	41.67	20	0	0.345	0.192	1	0	0	1	O	0.345
AF-P02461-F1	A	V	859	0	-	2397	U	0	0	125	37.71	20	0	0.625	0.136	1	0	0	1	O	0.625
AF-P02461-F1	A	K	860	0	-	2397	U	0	0	187	42.11	20	0	0.935	0.199	1	0	0	1	O	0.935
AF-P02461-F1	A	G	861	0	-	2397	U	0	0	69	42.09	20	0	0.345	0.198	1	0	0	1	O	0.345
AF-P02461-F1	A	E	862	0	-	2397	U	0	0	116	36.87	20	0	0.58	0.124	1	0	0	1	O	0.58
AF-P02461-F1	A	R	863	0	-	2397	U	0	0	200	36.98	20	0	1	0.126	1	0	0	1	O	1
AF-P02461-F1	A	G	864	0	-	2397	U	0	0	59	40.51	20	0	0.295	0.176	1	0	0	1	O	0.295
AF-P02461-F1	A	S	865	0	-	2397	U	0	0	121	35.47	20	0	0.605	0.105	1	0	0	1	O	0.605
AF-P02461-F1	A	P	866	0	-	2397	U	0	0	125	51.03	20	0	0.625	0.325	1	0	0	1	O	0.625
AF-P02461-F1	A	G	867	0	-	2397	U	0	0	84	35.19	20	0	0.42	0.101	1	0	0	1	O	0.42
AF-P02461-F1	A	G	868	0	-	2397	U	0	0	76	38.73	20	0	0.38	0.151	1	0	0	1	O	0.38
AF-P02461-F1	A	P	869	0	-	2397	U	0	0	137	43.47	20	0	0.685	0.218	1	0	0	1	O	0.685
AF-P02461-F1	A	G	870	0	-	2397	U	0	0	79	35.94	20	0	0.395	0.111	1	0	0	1	O	0.395
AF-P02461-F1	A	A	871	0	-	2397	U	0	0	104	35.92	20	0	0.52	0.111	1	0	0	1	O	0.52
AF-P02461-F1	A	A	872	0	-	2397	U	0	0	104	38.62	20	0	0.52	0.149	1	0	0	1	O	0.52
AF-P02461-F1	A	G	873	0	-	2397	U	0	0	63	37.91	20	0	0.315	0.139	1	0	0	1	O	0.315
AF-P02461-F1	A	F	874	0	-	2397	U	0	0	200	28.34	20	0	1	0.004	1	0	0	1	O	1
AF-P02461-F1	A	P	875	0	-	2397	U	0	0	115	50.52	20	0	0.575	0.318	1	0	0	1	O	0.575
AF-P02461-F1	A	G	876	0	-	2397	U	0	0	78	36.68	20	0	0.39	0.122	1	0	0	1	O	0.39
AF-P02461-F1	A	A	877	0	-	2397	U	0	0	103	33.9	20	0	0.515	0.082	1	0	0	1	O	0.515
AF-P02461-F1	A	R	878	0	-	2397	U	0	0	200	40.92	20	0	1	0.182	1	0	0	1	O	1
AF-P02461-F1	A	G	879	0	-	2397	U	0	0	63	41.85	20	0	0.315	0.195	1	0	0	1	O	0.315
AF-P02461-F1	A	L	880	0	-	2397	U	0	0	178	34.41	20	0	0.89	0.09	1	0	0	1	O	0.89
AF-P02461-F1	A	P	881	0	-	2397	U	0	0	128	45.97	20	0	0.64	0.253	1	0	0	1	O	0.64
AF-P02461-F1	A	G	882	0	-	2397	U	0	0	68	32.44	20	0	0.34	0.062	1	0	0	1	O	0.34
AF-P02461-F1	A	P	883	0	-	2397	U	0	0	62	35.75	20	0	0.31	0.109	1	0	0	1	O	0.31
AF-P02461-F1	A	P	884	0	-	2397	U	0	0	110	44.32	20	0	0.55	0.23	1	0	0	1	O	0.55
AF-P02461-F1	A	G	885	0	-	2397	U	0	0	71	47.75	20	0	0.355	0.278	1	0	0	1	O	0.355
AF-P02461-F1	A	S	886	0	-	2397	U	0	0	118	42.15	20	0	0.59	0.199	1	0	0	1	O	0.59
AF-P02461-F1	A	N	887	0	-	2397	U	0	0	154	41.01	20	0	0.77	0.183	1	0	0	1	O	0.77
AF-P02461-F1	A	G	888	0	-	2397	U	0	0	69	48.83	20	0	0.345	0.294	1	0	0	1	O	0.345
AF-P02461-F1	A	N	889	0	-	2397	U	0	0	154	38.65	20	0	0.77	0.15	1	0	0	1	O	0.77
AF-P02461-F1	A	P	890	0	-	2397	U	0	0	119	57.55	20	0	0.595	0.417	1	0	0	1	O	0.595
AF-P02461-F1	A	G	891	0	-	2397	U	0	0	61	55.99	20	0	0.305	0.395	1	0	0	1	O	0.305
AF-P02461-F1	A	P	892	0	-	2397	U	0	0	121	53.77	20	0	0.605	0.364	1	0	0	1	O	0.605
AF-P02461-F1	A	P	893	0	-	2397	U	0	0	126	56.35	20	0	0.63	0.4	1	0	0	1	O	0.63
AF-P02461-F1	A	G	894	0	-	2397	U	0	0	65	55.29	20	0	0.325	0.385	1	0	0	1	O	0.325
AF-P02461-F1	A	P	895	0	-	2397	U	0	0	131	53.94	20	0	0.655	0.366	1	0	0	1	O	0.655
AF-P02461-F1	A	S	896	0	-	2397	U	0	0	121	49.57	20	0	0.605	0.304	1	0	0	1	O	0.605
AF-P02461-F1	A	G	897	0	-	2397	U	0	0	69	50.4	20	0	0.345	0.316	1	0	0	1	O	0.345
AF-P02461-F1	A	S	898	0	-	2397	U	0	0	112	51.81	20	0	0.56	0.336	1	0	0	1	O	0.56
AF-P02461-F1	A	P	899	0	-	2397	U	0	0	114	50.5	20	0	0.57	0.317	1	0	0	1	O	0.57
AF-P02461-F1	A	G	900	0	-	2397	U	0	0	78	46.68	20	0	0.39	0.263	1	0	0	1	O	0.39
AF-P02461-F1	A	K	901	0	-	2397	U	0	0	200	43.32	20	0	1	0.216	1	0	0	1	O	1
AF-P02461-F1	A	D	902	0	-	2397	U	0	0	165	45.89	20	0	0.825	0.252	1	0	0	1	O	0.825
AF-P02461-F1	A	G	903	0	-	2397	U	0	0	66	57.54	20	0	0.33	0.417	1	0	0	1	O	0.33
AF-P02461-F1	A	P	904	0	-	2397	U	0	0	123	50.41	20	0	0.615	0.316	1	0	0	1	O	0.615
AF-P02461-F1	A	P	905	0	-	2397	U	0	0	133	43.85	20	0	0.665	0.223	1	0	0	1	O	0.665
AF-P02461-F1	A	G	906	0	-	2397	U	0	0	67	49.47	20	0	0.335	0.303	1	0	0	1	O	0.335
AF-P02461-F1	A	P	907	0	-	2397	U	0	0	136	44.57	20	0	0.68	0.233	1	0	0	1	O	0.68
AF-P02461-F1	A	A	908	0	-	2397	U	0	0	99	40.25	20	0	0.495	0.172	1	0	0	1	O	0.495
AF-P02461-F1	A	G	909	0	-	2397	U	0	0	75	47.7	20	0	0.375	0.278	1	0	0	1	O	0.375
AF-P02461-F1	A	N	910	0	-	2397	U	0	0	164	41.84	20	0	0.82	0.195	1	0	0	1	O	0.82
AF-P02461-F1	A	T	911	0	-	2397	U	0	0	150	41.92	20	0	0.75	0.196	1	0	0	1	O	0.75
AF-P02461-F1	A	G	912	0	-	2397	U	0	0	71	38	20	0	0.355	0.14	1	0	0	1	O	0.355
AF-P02461-F1	A	A	913	0	-	2397	U	0	0	99	43.87	20	0	0.495	0.224	1	0	0	1	O	0.495
AF-P02461-F1	A	P	914	0	-	2397	U	0	0	133	53.53	20	0	0.665	0.36	1	0	0	1	O	0.665
AF-P02461-F1	A	G	915	0	-	2397	U	0	0	68	38.59	20	0	0.34	0.149	1	0	0	1	O	0.34
AF-P02461-F1	A	S	916	0	-	2397	U	0	0	122	41.21	20	0	0.61	0.186	1	0	0	1	O	0.61
AF-P02461-F1	A	P	917	0	-	2397	U	0	0	130	50.32	20	0	0.65	0.315	1	0	0	1	O	0.65
AF-P02461-F1	A	G	918	0	-	2397	U	0	0	75	37.63	20	0	0.375	0.135	1	0	0	1	O	0.375
AF-P02461-F1	A	V	919	0	-	2397	U	0	0	154	43.93	20	0	0.77	0.224	1	0	0	1	O	0.77
AF-P02461-F1	A	S	920	0	-	2397	U	0	0	128	46.29	20	0	0.64	0.258	1	0	0	1	O	0.64
AF-P02461-F1	A	G	921	0	-	2397	U	0	0	70	42.35	20	0	0.35	0.202	1	0	0	1	O	0.35
AF-P02461-F1	A	P	922	0	-	2397	U	0	0	131	48.14	20	0	0.655	0.284	1	0	0	1	O	0.655
AF-P02461-F1	A	K	923	0	-	2397	U	0	0	191	42.73	20	0	0.955	0.207	1	0	0	1	O	0.955
AF-P02461-F1	A	G	924	0	-	2397	U	0	0	61	51.26	20	0	0.305	0.328	1	0	0	1	O	0.305
AF-P02461-F1	A	D	925	0	-	2397	U	0	0	164	46.16	20	0	0.82	0.256	1	0	0	1	O	0.82
AF-P02461-F1	A	A	926	0	-	2397	U	0	0	88	52.2	20	0	0.44	0.341	1	0	0	1	O	0.44
AF-P02461-F1	A	G	927	0	-	2397	U	0	0	69	49.73	20	0	0.345	0.307	1	0	0	1	O	0.345
AF-P02461-F1	A	Q	928	0	-	2397	U	0	0	188	46.74	20	0	0.94	0.264	1	0	0	1	O	0.94
AF-P02461-F1	A	P	929	0	-	2397	U	0	0	123	63.24	20	0	0.615	0.498	1	0	0	1	O	0.615
AF-P02461-F1	A	G	930	0	-	2397	U	0	0	71	52.04	20	0	0.355	0.339	1	0	0	1	O	0.355
AF-P02461-F1	A	E	931	0	-	2397	U	0	0	198	48.5	20	0	0.99	0.289	1	0	0	1	O	0.99
AF-P02461-F1	A	K	932	0	-	2397	U	0	0	191	49.53	20	0	0.955	0.304	1	0	0	1	O	0.955
AF-P02461-F1	A	G	933	0	-	2397	U	0	0	61	50.92	20	0	0.305	0.323	1	0	0	1	O	0.305
AF-P02461-F1	A	S	934	0	-	2397	U	0	0	109	48.91	20	0	0.545	0.295	1	0	0	1	O	0.545
AF-P02461-F1	A	P	935	0	-	2397	U	0	0	117	61.33	20	0	0.585	0.471	1	0	0	1	O	0.585
AF-P02461-F1	A	G	936	0	-	2397	U	0	0	73	50.53	20	0	0.365	0.318	1	0	0	1	O	0.365
AF-P02461-F1	A	A	937	0	-	2397	U	0	0	99	45.24	20	0	0.495	0.243	1	0	0	1	O	0.495
AF-P02461-F1	A	Q	938	0	-	2397	U	0	0	176	54.21	20	0	0.88	0.37	1	0	0	1	O	0.88
AF-P02461-F1	A	G	939	0	-	2397	U	0	0	53	53.39	20	0	0.265	0.358	1	0	0	1	O	0.265
AF-P02461-F1	A	P	940	0	-	2397	U	0	0	86	53.4	20	0	0.43	0.358	1	0	0	1	O	0.43
AF-P02461-F1	A	P	941	0	-	2397	U	0	0	102	61.43	20	0	0.51	0.472	1	0	0	1	O	0.51
AF-P02461-F1	A	G	942	0	-	2397	U	0	0	66	51.24	20	0	0.33	0.328	1	0	0	1	O	0.33
AF-P02461-F1	A	A	943	0	-	2397	U	0	0	60	47.37	20	0	0.3	0.273	1	0	0	1	O	0.3
AF-P02461-F1	A	P	944	0	-	2397	U	0	0	109	52.1	20	0	0.545	0.34	1	0	0	1	O	0.545
AF-P02461-F1	A	G	945	0	-	2397	U	0	0	61	51.02	20	0	0.305	0.325	1	0	0	1	O	0.305
AF-P02461-F1	A	P	946	0	-	2397	U	0	0	130	43.46	20	0	0.65	0.218	1	0	0	1	O	0.65
AF-P02461-F1	A	L	947	0	-	2397	U	0	0	169	39.92	20	0	0.845	0.168	1	0	0	1	O	0.845
AF-P02461-F1	A	G	948	1	M10.009|M10.013|M10.002	2397	U	0	0	73	38.49	20	0	0.365	0.147	1	0	0	1	O	0.365
AF-P02461-F1	A	I	949	0	-	2397	U	0	0	166	37.37	20	0	0.83	0.132	1	0	0	1	O	0.83
AF-P02461-F1	A	A	950	0	-	2397	U	0	0	99	47.12	20	0	0.495	0.27	1	0	0	1	O	0.495
AF-P02461-F1	A	G	951	0	-	2397	U	0	0	71	35.59	20	0	0.355	0.106	1	0	0	1	O	0.355
AF-P02461-F1	A	I	952	1	S01.131	2397	U	0	0	165	34.61	20	0	0.825	0.092	1	0	0	1	O	0.825
AF-P02461-F1	A	T	953	0	-	2397	U	0	0	146	38.35	20	0	0.73	0.145	1	0	0	1	O	0.73
AF-P02461-F1	A	G	954	0	-	2397	U	0	0	74	39.76	20	0	0.37	0.165	1	0	0	1	O	0.37
AF-P02461-F1	A	A	955	1	S01.131	2397	U	0	0	94	35.94	20	0	0.47	0.111	1	0	0	1	O	0.47
AF-P02461-F1	A	R	956	0	-	2397	U	0	0	200	31.79	20	0	1	0.053	1	0	0	1	O	1
AF-P02461-F1	A	G	957	0	-	2397	U	0	0	66	33.81	20	0	0.33	0.081	1	0	0	1	O	0.33
AF-P02461-F1	A	L	958	0	-	2397	U	0	0	187	34.26	20	0	0.935	0.087	1	0	0	1	O	0.935
AF-P02461-F1	A	A	959	0	-	2397	U	0	0	102	35.86	20	0	0.51	0.11	1	0	0	1	O	0.51
AF-P02461-F1	A	G	960	0	-	2397	U	0	0	64	36.67	20	0	0.32	0.122	1	0	0	1	O	0.32
AF-P02461-F1	A	P	961	0	-	2397	U	0	0	79	39.24	20	0	0.395	0.158	1	0	0	1	O	0.395
AF-P02461-F1	A	P	962	0	-	2397	U	0	0	114	50.1	20	0	0.57	0.312	1	0	0	1	O	0.57
AF-P02461-F1	A	G	963	0	-	2397	U	0	0	70	39.69	20	0	0.35	0.164	1	0	0	1	O	0.35
AF-P02461-F1	A	M	964	0	-	2397	U	0	0	182	37.14	20	0	0.91	0.128	1	0	0	1	O	0.91
AF-P02461-F1	A	P	965	0	-	2397	U	0	0	124	42.47	20	0	0.62	0.204	1	0	0	1	O	0.62
AF-P02461-F1	A	G	966	0	-	2397	U	0	0	73	47.2	20	0	0.365	0.271	1	0	0	1	O	0.365
AF-P02461-F1	A	P	967	0	-	2397	U	0	0	128	39.91	20	0	0.64	0.167	1	0	0	1	O	0.64
AF-P02461-F1	A	R	968	0	-	2397	U	0	0	200	36.65	20	0	1	0.121	1	0	0	1	O	1
AF-P02461-F1	A	G	969	0	-	2397	U	0	0	76	41.55	20	0	0.38	0.191	1	0	0	1	O	0.38
AF-P02461-F1	A	S	970	0	-	2397	U	0	0	114	33.02	20	0	0.57	0.07	1	0	0	1	O	0.57
AF-P02461-F1	A	P	971	0	-	2397	U	0	0	129	39.74	20	0	0.645	0.165	1	0	0	1	O	0.645
AF-P02461-F1	A	G	972	0	-	2397	U	0	0	58	43.63	20	0	0.29	0.22	1	0	0	1	O	0.29
AF-P02461-F1	A	P	973	0	-	2397	U	0	0	62	31.57	20	0	0.31	0.049	1	0	0	1	O	0.31
AF-P02461-F1	A	Q	974	0	-	2397	U	0	0	169	40.7	20	0	0.845	0.179	1	0	0	1	O	0.845
AF-P02461-F1	A	G	975	1	M10.002|M10.009	2397	U	0	0	61	43.8	20	0	0.305	0.223	1	0	0	1	O	0.305
AF-P02461-F1	A	V	976	0	-	2397	U	0	0	144	31.4	20	0	0.72	0.047	1	0	0	1	O	0.72
AF-P02461-F1	A	K	977	0	-	2397	U	0	0	200	36.8	20	0	1	0.123	1	0	0	1	O	1
AF-P02461-F1	A	G	978	0	-	2397	U	0	0	68	37.4	20	0	0.34	0.132	1	0	0	1	O	0.34
AF-P02461-F1	A	E	979	0	-	2397	U	0	0	196	30.39	20	0	0.98	0.033	1	0	0	1	O	0.98
AF-P02461-F1	A	S	980	0	-	2397	U	0	0	123	37.69	20	0	0.615	0.136	1	0	0	1	O	0.615
AF-P02461-F1	A	G	981	0	-	2397	U	0	0	80	39.17	20	0	0.4	0.157	1	0	0	1	O	0.4
AF-P02461-F1	A	K	982	0	-	2397	U	0	0	200	32.41	20	0	1	0.061	1	0	0	1	O	1
AF-P02461-F1	A	P	983	0	-	2397	U	0	0	128	45.82	20	0	0.64	0.251	1	0	0	1	O	0.64
AF-P02461-F1	A	G	984	0	-	2397	U	0	0	79	33.18	20	0	0.395	0.072	1	0	0	1	O	0.395
AF-P02461-F1	A	A	985	0	-	2397	U	0	0	103	33.07	20	0	0.515	0.071	1	0	0	1	O	0.515
AF-P02461-F1	A	N	986	0	-	2397	U	0	0	174	34.38	20	0	0.87	0.089	1	0	0	1	O	0.87
AF-P02461-F1	A	G	987	0	-	2397	U	0	0	68	35.64	20	0	0.34	0.107	1	0	0	1	O	0.34
AF-P02461-F1	A	L	988	0	-	2397	U	0	0	174	32.92	20	0	0.87	0.069	1	0	0	1	O	0.87
AF-P02461-F1	A	S	989	0	-	2397	U	0	0	122	36.32	20	0	0.61	0.117	1	0	0	1	O	0.61
AF-P02461-F1	A	G	990	0	-	2397	U	0	0	76	38.43	20	0	0.38	0.147	1	0	0	1	O	0.38
AF-P02461-F1	A	E	991	0	-	2397	U	0	0	200	35.81	20	0	1	0.109	1	0	0	1	O	1
AF-P02461-F1	A	R	992	0	-	2397	U	0	0	200	36.95	20	0	1	0.126	1	0	0	1	O	1
AF-P02461-F1	A	G	993	0	-	2397	U	0	0	57	42.77	20	0	0.285	0.208	1	0	0	1	O	0.285
AF-P02461-F1	A	P	994	0	-	2397	U	0	0	121	40.47	20	0	0.605	0.175	1	0	0	1	O	0.605
AF-P02461-F1	A	P	995	0	-	2397	U	0	0	119	44.89	20	0	0.595	0.238	1	0	0	1	O	0.595
AF-P02461-F1	A	G	996	0	-	2397	U	0	0	57	45.66	20	0	0.285	0.249	1	0	0	1	O	0.285
AF-P02461-F1	A	P	997	0	-	2397	U	0	0	134	45.13	20	0	0.67	0.241	1	0	0	1	O	0.67
AF-P02461-F1	A	Q	998	0	-	2397	U	0	0	179	39.86	20	0	0.895	0.167	1	0	0	1	O	0.895
AF-P02461-F1	A	G	999	0	-	2397	U	0	0	60	45.3	20	0	0.3	0.244	1	0	0	1	O	0.3
AF-P02461-F1	A	L	1000	0	-	2397	U	0	0	171	38.1	20	0	0.855	0.142	1	0	0	1	O	0.855
AF-P02461-F1	A	P	1001	0	-	2397	U	0	0	104	46.2	20	0	0.52	0.257	1	0	0	1	O	0.52
AF-P02461-F1	A	G	1002	0	-	2397	U	0	0	76	40.71	20	0	0.38	0.179	1	0	0	1	O	0.38
AF-P02461-F1	A	L	1003	0	-	2397	U	0	0	178	37.75	20	0	0.89	0.137	1	0	0	1	O	0.89
AF-P02461-F1	A	A	1004	0	-	2397	U	0	0	95	41.68	20	0	0.475	0.193	1	0	0	1	O	0.475
AF-P02461-F1	A	G	1005	0	-	2397	U	0	0	80	42.07	20	0	0.4	0.198	1	0	0	1	O	0.4
AF-P02461-F1	A	T	1006	0	-	2397	U	0	0	105	43.73	20	0	0.525	0.222	1	0	0	1	O	0.525
AF-P02461-F1	A	A	1007	0	-	2397	U	0	0	86	44.36	20	0	0.43	0.23	1	0	0	1	O	0.43
AF-P02461-F1	A	G	1008	0	-	2397	U	0	0	65	44.74	20	0	0.325	0.236	1	0	0	1	O	0.325
AF-P02461-F1	A	E	1009	0	-	2397	U	0	0	101	41.83	20	0	0.505	0.195	1	0	0	1	O	0.505
AF-P02461-F1	A	P	1010	0	-	2397	U	0	0	120	48.27	20	0	0.6	0.286	1	0	0	1	O	0.6
AF-P02461-F1	A	G	1011	0	-	2397	U	0	0	74	41.82	20	0	0.37	0.195	1	0	0	1	O	0.37
AF-P02461-F1	A	R	1012	0	-	2397	U	0	0	200	41.19	20	0	1	0.186	1	0	0	1	O	1
AF-P02461-F1	A	D	1013	0	-	2397	U	0	0	160	42.87	20	0	0.8	0.209	1	0	0	1	O	0.8
AF-P02461-F1	A	G	1014	0	-	2397	U	0	0	66	43.02	20	0	0.33	0.212	1	0	0	1	O	0.33
AF-P02461-F1	A	N	1015	0	-	2397	U	0	0	162	32.49	20	0	0.81	0.062	1	0	0	1	O	0.81
AF-P02461-F1	A	P	1016	0	-	2397	U	0	0	128	57.74	20	0	0.64	0.42	1	0	0	1	O	0.64
AF-P02461-F1	A	G	1017	0	-	2397	U	0	0	77	45.41	20	0	0.385	0.245	1	0	0	1	O	0.385
AF-P02461-F1	A	S	1018	0	-	2397	U	0	0	101	33.3	20	0	0.505	0.074	1	0	0	1	O	0.505
AF-P02461-F1	A	D	1019	0	-	2397	U	0	0	157	33.74	20	0	0.785	0.08	1	0	0	1	O	0.785
AF-P02461-F1	A	G	1020	0	-	2397	U	0	0	75	37.1	20	0	0.375	0.128	1	0	0	1	O	0.375
AF-P02461-F1	A	L	1021	0	-	2397	U	0	0	172	38.62	20	0	0.86	0.149	1	0	0	1	O	0.86
AF-P02461-F1	A	P	1022	0	-	2397	U	0	0	127	48.41	20	0	0.635	0.288	1	0	0	1	O	0.635
AF-P02461-F1	A	G	1023	0	-	2397	U	0	0	73	36.23	20	0	0.365	0.115	1	0	0	1	O	0.365
AF-P02461-F1	A	R	1024	0	-	2397	U	0	0	200	33.79	20	0	1	0.081	1	0	0	1	O	1
AF-P02461-F1	A	D	1025	0	-	2397	U	0	0	131	36.24	20	0	0.655	0.116	1	0	0	1	O	0.655
AF-P02461-F1	A	G	1026	0	-	2397	U	0	0	83	38.8	20	0	0.415	0.152	1	0	0	1	O	0.415
AF-P02461-F1	A	S	1027	0	-	2397	U	0	0	114	45.56	20	0	0.57	0.247	1	0	0	1	O	0.57
AF-P02461-F1	A	P	1028	0	-	2397	U	0	0	127	48.1	20	0	0.635	0.283	1	0	0	1	O	0.635
AF-P02461-F1	A	G	1029	0	-	2397	U	0	0	88	35.25	20	0	0.44	0.102	1	0	0	1	O	0.44
AF-P02461-F1	A	G	1030	0	-	2397	U	0	0	70	44.53	20	0	0.35	0.233	1	0	0	1	O	0.35
AF-P02461-F1	A	K	1031	0	-	2397	U	0	0	200	38.79	20	0	1	0.152	1	0	0	1	O	1
AF-P02461-F1	A	G	1032	0	-	2397	U	0	0	66	38.69	20	0	0.33	0.15	1	0	0	1	O	0.33
AF-P02461-F1	A	D	1033	0	-	2397	U	0	0	151	40.94	20	0	0.755	0.182	1	0	0	1	O	0.755
AF-P02461-F1	A	R	1034	0	-	2397	U	0	0	200	39.84	20	0	1	0.167	1	0	0	1	O	1
AF-P02461-F1	A	G	1035	0	-	2397	U	0	0	77	43.94	20	0	0.385	0.225	1	0	0	1	O	0.385
AF-P02461-F1	A	E	1036	0	-	2397	U	0	0	196	34.94	20	0	0.98	0.097	1	0	0	1	O	0.98
AF-P02461-F1	A	N	1037	0	-	2397	U	0	0	169	40.92	20	0	0.845	0.182	1	0	0	1	O	0.845
AF-P02461-F1	A	G	1038	0	-	2397	U	0	0	61	44.19	20	0	0.305	0.228	1	0	0	1	O	0.305
AF-P02461-F1	A	S	1039	0	-	2397	U	0	0	119	44.36	20	0	0.595	0.23	1	0	0	1	O	0.595
AF-P02461-F1	A	P	1040	0	-	2397	U	0	0	128	56.83	20	0	0.64	0.407	1	0	0	1	O	0.64
AF-P02461-F1	A	G	1041	0	-	2397	U	0	0	74	49.07	20	0	0.37	0.297	1	0	0	1	O	0.37
AF-P02461-F1	A	A	1042	0	-	2397	U	0	0	96	45.6	20	0	0.48	0.248	1	0	0	1	O	0.48
AF-P02461-F1	A	P	1043	0	-	2397	U	0	0	134	53.01	20	0	0.67	0.353	1	0	0	1	O	0.67
AF-P02461-F1	A	G	1044	0	-	2397	U	0	0	73	49.47	20	0	0.365	0.303	1	0	0	1	O	0.365
AF-P02461-F1	A	A	1045	0	-	2397	U	0	0	94	43.61	20	0	0.47	0.22	1	0	0	1	O	0.47
AF-P02461-F1	A	P	1046	0	-	2397	U	0	0	130	56.39	20	0	0.65	0.401	1	0	0	1	O	0.65
AF-P02461-F1	A	G	1047	0	-	2397	U	0	0	74	50.18	20	0	0.37	0.313	1	0	0	1	O	0.37
AF-P02461-F1	A	H	1048	0	-	2397	U	0	0	185	40.41	20	0	0.925	0.175	1	0	0	1	O	0.925
AF-P02461-F1	A	P	1049	0	-	2397	U	0	0	129	57.74	20	0	0.645	0.42	1	0	0	1	O	0.645
AF-P02461-F1	A	G	1050	0	-	2397	U	0	0	66	56.41	20	0	0.33	0.401	1	0	0	1	O	0.33
AF-P02461-F1	A	P	1051	0	-	2397	U	0	0	125	44.57	20	0	0.625	0.233	1	0	0	1	O	0.625
AF-P02461-F1	A	P	1052	0	-	2397	U	0	0	131	58.31	20	0	0.655	0.428	1	0	0	1	O	0.655
AF-P02461-F1	A	G	1053	0	-	2397	U	0	0	62	58.58	20	0	0.31	0.432	1	0	0	1	O	0.31
AF-P02461-F1	A	P	1054	0	-	2397	U	0	0	136	43.16	20	0	0.68	0.214	1	0	0	1	O	0.68
AF-P02461-F1	A	V	1055	0	-	2397	U	0	0	140	56.36	20	0	0.7	0.4	1	0	0	1	O	0.7
AF-P02461-F1	A	G	1056	0	-	2397	U	0	0	67	53.25	20	0	0.335	0.356	1	0	0	1	O	0.335
AF-P02461-F1	A	P	1057	0	-	2397	U	0	0	123	47.94	20	0	0.615	0.281	1	0	0	1	O	0.615
AF-P02461-F1	A	A	1058	0	-	2397	U	0	0	102	42.88	20	0	0.51	0.21	1	0	0	1	O	0.51
AF-P02461-F1	A	G	1059	0	-	2397	U	0	0	72	41.25	20	0	0.36	0.186	1	0	0	1	O	0.36
AF-P02461-F1	A	K	1060	0	-	2397	U	0	0	200	38.62	20	0	1	0.149	1	0	0	1	O	1
AF-P02461-F1	A	S	1061	0	-	2397	U	0	0	105	38.81	20	0	0.525	0.152	1	0	0	1	O	0.525
AF-P02461-F1	A	G	1062	0	-	2397	U	0	0	73	43.58	20	0	0.365	0.219	1	0	0	1	O	0.365
AF-P02461-F1	A	D	1063	0	-	2397	U	0	0	146	35.45	20	0	0.73	0.104	1	0	0	1	O	0.73
AF-P02461-F1	A	R	1064	0	-	2397	U	0	0	200	41.07	20	0	1	0.184	1	0	0	1	O	1
AF-P02461-F1	A	G	1065	0	-	2397	U	0	0	69	44.98	20	0	0.345	0.239	1	0	0	1	O	0.345
AF-P02461-F1	A	E	1066	0	-	2397	U	0	0	188	33.85	20	0	0.94	0.082	1	0	0	1	O	0.94
AF-P02461-F1	A	S	1067	0	-	2397	U	0	0	123	42.33	20	0	0.615	0.202	1	0	0	1	O	0.615
AF-P02461-F1	A	G	1068	0	-	2397	U	0	0	60	46.64	20	0	0.3	0.263	1	0	0	1	O	0.3
AF-P02461-F1	A	P	1069	0	-	2397	U	0	0	142	53.95	20	0	0.71	0.366	1	0	0	1	O	0.71
AF-P02461-F1	A	A	1070	0	-	2397	U	0	0	105	35.38	20	0	0.525	0.103	1	0	0	1	O	0.525
AF-P02461-F1	A	G	1071	0	-	2397	U	0	0	65	39.83	20	0	0.325	0.166	1	0	0	1	O	0.325
AF-P02461-F1	A	P	1072	0	-	2397	U	0	0	135	38.3	20	0	0.675	0.145	1	0	0	1	O	0.675
AF-P02461-F1	A	A	1073	0	-	2397	U	0	0	109	51.61	20	0	0.545	0.333	1	0	0	1	O	0.545
AF-P02461-F1	A	G	1074	0	-	2397	U	0	0	76	41.26	20	0	0.38	0.187	1	0	0	1	O	0.38
AF-P02461-F1	A	A	1075	0	-	2397	U	0	0	101	35.87	20	0	0.505	0.11	1	0	0	1	O	0.505
AF-P02461-F1	A	P	1076	0	-	2397	U	0	0	136	56.85	20	0	0.68	0.407	1	0	0	1	O	0.68
AF-P02461-F1	A	G	1077	0	-	2397	U	0	0	72	38.74	20	0	0.36	0.151	1	0	0	1	O	0.36
AF-P02461-F1	A	P	1078	0	-	2397	U	0	0	138	42.86	20	0	0.69	0.209	1	0	0	1	O	0.69
AF-P02461-F1	A	A	1079	0	-	2397	U	0	0	102	42.28	20	0	0.51	0.201	1	0	0	1	O	0.51
AF-P02461-F1	A	G	1080	0	-	2397	U	0	0	83	47.63	20	0	0.415	0.277	1	0	0	1	O	0.415
AF-P02461-F1	A	S	1081	0	-	2397	U	0	0	129	43.37	20	0	0.645	0.216	1	0	0	1	O	0.645
AF-P02461-F1	A	R	1082	0	-	2397	U	0	0	200	48.11	20	0	1	0.284	1	0	0	1	O	1
AF-P02461-F1	A	G	1083	0	-	2397	U	0	0	70	49.56	20	0	0.35	0.304	1	0	0	1	O	0.35
AF-P02461-F1	A	A	1084	0	-	2397	U	0	0	93	45.93	20	0	0.465	0.253	1	0	0	1	O	0.465
AF-P02461-F1	A	P	1085	0	-	2397	U	0	0	131	45.48	20	0	0.655	0.246	1	0	0	1	O	0.655
AF-P02461-F1	A	G	1086	0	-	2397	U	0	0	66	47.66	20	0	0.33	0.277	1	0	0	1	O	0.33
AF-P02461-F1	A	P	1087	0	-	2397	U	0	0	135	49	20	0	0.675	0.296	1	0	0	1	O	0.675
AF-P02461-F1	A	Q	1088	0	-	2397	U	0	0	185	45.47	20	0	0.925	0.246	1	0	0	1	O	0.925
AF-P02461-F1	A	G	1089	0	-	2397	U	0	0	55	54.44	20	0	0.275	0.373	1	0	0	1	O	0.275
AF-P02461-F1	A	P	1090	0	-	2397	U	0	0	128	53.26	20	0	0.64	0.357	1	0	0	1	O	0.64
AF-P02461-F1	A	R	1091	0	-	2397	U	0	0	200	41.37	20	0	1	0.188	1	0	0	1	O	1
AF-P02461-F1	A	G	1092	0	-	2397	U	0	0	58	45.35	20	0	0.29	0.245	1	0	0	1	O	0.29
AF-P02461-F1	A	D	1093	0	-	2397	U	0	0	144	42.49	20	0	0.72	0.204	1	0	0	1	O	0.72
AF-P02461-F1	A	K	1094	0	-	2397	U	0	0	164	44.4	20	0	0.82	0.231	1	0	0	1	O	0.82
AF-P02461-F1	A	G	1095	0	-	2397	U	0	0	63	41.25	20	0	0.315	0.186	1	0	0	1	O	0.315
AF-P02461-F1	A	E	1096	0	-	2397	U	0	0	154	44.08	20	0	0.77	0.227	1	0	0	1	O	0.77
AF-P02461-F1	A	T	1097	0	-	2397	U	0	0	138	39.82	20	0	0.69	0.166	1	0	0	1	O	0.69
AF-P02461-F1	A	G	1098	0	-	2397	U	0	0	69	40.2	20	0	0.345	0.172	1	0	0	1	O	0.345
AF-P02461-F1	A	E	1099	0	-	2397	U	0	0	200	43.89	20	0	1	0.224	1	0	0	1	O	1
AF-P02461-F1	A	R	1100	0	-	2397	U	0	0	200	38.68	20	0	1	0.15	1	0	0	1	O	1
AF-P02461-F1	A	G	1101	0	-	2397	U	0	0	73	42.9	20	0	0.365	0.21	1	0	0	1	O	0.365
AF-P02461-F1	A	A	1102	0	-	2397	U	0	0	100	38.24	20	0	0.5	0.144	1	0	0	1	O	0.5
AF-P02461-F1	A	A	1103	0	-	2397	U	0	0	113	38.64	20	0	0.565	0.15	1	0	0	1	O	0.565
AF-P02461-F1	A	G	1104	0	-	2397	U	0	0	73	37.42	20	0	0.365	0.132	1	0	0	1	O	0.365
AF-P02461-F1	A	I	1105	0	-	2397	U	0	0	168	40.87	20	0	0.84	0.181	1	0	0	1	O	0.84
AF-P02461-F1	A	K	1106	0	-	2397	U	0	0	200	38.1	20	0	1	0.142	1	0	0	1	O	1
AF-P02461-F1	A	G	1107	0	-	2397	U	0	0	73	40.49	20	0	0.365	0.176	1	0	0	1	O	0.365
AF-P02461-F1	A	H	1108	0	-	2397	U	0	0	177	41.5	20	0	0.885	0.19	1	0	0	1	O	0.885
AF-P02461-F1	A	R	1109	0	-	2397	U	0	0	200	40.92	20	0	1	0.182	1	0	0	1	O	1
AF-P02461-F1	A	G	1110	0	-	2397	U	0	0	70	35.45	20	0	0.35	0.104	1	0	0	1	O	0.35
AF-P02461-F1	A	F	1111	0	-	2397	U	0	0	180	36.53	20	0	0.9	0.12	1	0	0	1	O	0.9
AF-P02461-F1	A	P	1112	0	-	2397	U	0	0	119	55.96	20	0	0.595	0.395	1	0	0	1	O	0.595
AF-P02461-F1	A	G	1113	0	-	2397	U	0	0	74	43.13	20	0	0.37	0.213	1	0	0	1	O	0.37
AF-P02461-F1	A	N	1114	0	-	2397	U	0	0	161	36.82	20	0	0.805	0.124	1	0	0	1	O	0.805
AF-P02461-F1	A	P	1115	0	-	2397	U	0	0	132	43.73	20	0	0.66	0.222	1	0	0	1	O	0.66
AF-P02461-F1	A	G	1116	0	-	2397	U	0	0	74	47.68	20	0	0.37	0.278	1	0	0	1	O	0.37
AF-P02461-F1	A	A	1117	0	-	2397	U	0	0	98	39.28	20	0	0.49	0.159	1	0	0	1	O	0.49
AF-P02461-F1	A	P	1118	0	-	2397	U	0	0	136	45.5	20	0	0.68	0.247	1	0	0	1	O	0.68
AF-P02461-F1	A	G	1119	0	-	2397	U	0	0	75	46.99	20	0	0.375	0.268	1	0	0	1	O	0.375
AF-P02461-F1	A	S	1120	0	-	2397	U	0	0	115	40.86	20	0	0.575	0.181	1	0	0	1	O	0.575
AF-P02461-F1	A	P	1121	0	-	2397	U	0	0	128	46.63	20	0	0.64	0.263	1	0	0	1	O	0.64
AF-P02461-F1	A	G	1122	0	-	2397	U	0	0	68	50.48	20	0	0.34	0.317	1	0	0	1	O	0.34
AF-P02461-F1	A	P	1123	0	-	2397	U	0	0	139	41.73	20	0	0.695	0.193	1	0	0	1	O	0.695
AF-P02461-F1	A	A	1124	0	-	2397	U	0	0	110	46.56	20	0	0.55	0.262	1	0	0	1	O	0.55
AF-P02461-F1	A	G	1125	1	M10.004|M10.009|M10.013	2397	U	0	0	71	41.46	20	0	0.355	0.189	1	0	0	1	O	0.355
AF-P02461-F1	A	Q	1126	0	-	2397	U	0	0	200	34.89	20	0	1	0.096	1	0	0	1	O	1
AF-P02461-F1	A	Q	1127	0	-	2397	U	0	0	162	35.42	20	0	0.81	0.104	1	0	0	1	O	0.81
AF-P02461-F1	A	G	1128	1	M10.002|M10.009|M10.005|M10.013	2397	U	0	0	39	39.6	20	0	0.195	0.163	1	0	0	1	O	0.195
AF-P02461-F1	A	A	1129	1	M10.004|M10.003	2397	U	0	0	75	34.23	20	0	0.375	0.087	1	0	0	1	O	0.375
AF-P02461-F1	A	I	1130	0	-	2397	U	0	0	135	40.03	20	0	0.675	0.169	1	0	0	1	O	0.675
AF-P02461-F1	A	G	1131	0	-	2397	U	0	0	50	37.5	20	0	0.25	0.133	1	0	0	1	O	0.25
AF-P02461-F1	A	S	1132	0	-	2397	U	0	0	113	36.45	20	0	0.565	0.119	1	0	0	1	O	0.565
AF-P02461-F1	A	P	1133	0	-	2397	U	0	0	110	50.7	20	0	0.55	0.32	1	0	0	1	O	0.55
AF-P02461-F1	A	G	1134	0	-	2397	U	0	0	74	37.44	20	0	0.37	0.133	1	0	0	1	O	0.37
AF-P02461-F1	A	P	1135	0	-	2397	U	0	0	139	38.01	20	0	0.695	0.141	1	0	0	1	O	0.695
AF-P02461-F1	A	A	1136	0	-	2397	U	0	0	108	49.39	20	0	0.54	0.302	1	0	0	1	O	0.54
AF-P02461-F1	A	G	1137	0	-	2397	U	0	0	74	39.99	20	0	0.37	0.169	1	0	0	1	O	0.37
AF-P02461-F1	A	P	1138	0	-	2397	U	0	0	134	36.59	20	0	0.67	0.12	1	0	0	1	O	0.67
AF-P02461-F1	A	R	1139	0	-	2397	U	0	0	200	48.9	20	0	1	0.295	1	0	0	1	O	1
AF-P02461-F1	A	G	1140	0	-	2397	U	0	0	54	44.45	20	0	0.27	0.232	1	0	0	1	O	0.27
AF-P02461-F1	A	P	1141	0	-	2397	U	0	0	133	37.25	20	0	0.665	0.13	1	0	0	1	O	0.665
AF-P02461-F1	A	V	1142	0	-	2397	U	0	0	132	51.39	20	0	0.66	0.33	1	0	0	1	O	0.66
AF-P02461-F1	A	G	1143	0	-	2397	U	0	0	59	45.02	20	0	0.295	0.24	1	0	0	1	O	0.295
AF-P02461-F1	A	P	1144	0	-	2397	U	0	0	134	40.04	20	0	0.67	0.169	1	0	0	1	O	0.67
AF-P02461-F1	A	S	1145	0	-	2397	U	0	0	120	47.07	20	0	0.6	0.269	1	0	0	1	O	0.6
AF-P02461-F1	A	G	1146	0	-	2397	U	0	0	65	50.61	20	0	0.325	0.319	1	0	0	1	O	0.325
AF-P02461-F1	A	P	1147	0	-	2397	U	0	0	126	48.35	20	0	0.63	0.287	1	0	0	1	O	0.63
AF-P02461-F1	A	P	1148	0	-	2397	U	0	0	56	52.12	20	0	0.28	0.34	1	0	0	1	O	0.28
AF-P02461-F1	A	G	1149	1	M10.004|M10.009|M10.005|M10.003|M10.002|M10.013	2397	U	0	0	66	53.82	20	0	0.33	0.364	1	0	0	1	O	0.33
AF-P02461-F1	A	K	1150	0	-	2397	U	0	0	110	39.02	20	0	0.55	0.155	1	0	0	1	O	0.55
AF-P02461-F1	A	D	1151	0	-	2397	U	0	0	157	43.88	20	0	0.785	0.224	1	0	0	1	O	0.785
AF-P02461-F1	A	G	1152	0	-	2397	U	0	0	80	42.01	20	0	0.4	0.197	1	0	0	1	O	0.4
AF-P02461-F1	A	T	1153	0	-	2397	U	0	0	146	41.31	20	0	0.73	0.187	1	0	0	1	O	0.73
AF-P02461-F1	A	S	1154	0	-	2397	U	0	0	120	44.28	20	0	0.6	0.229	1	0	0	1	O	0.6
AF-P02461-F1	A	G	1155	0	-	2397	U	0	0	75	45.89	20	0	0.375	0.252	1	0	0	1	O	0.375
AF-P02461-F1	A	H	1156	0	-	2397	U	0	0	183	43.34	20	0	0.915	0.216	1	0	0	1	O	0.915
AF-P02461-F1	A	P	1157	0	-	2397	U	0	0	131	58.35	20	0	0.655	0.429	1	0	0	1	O	0.655
AF-P02461-F1	A	G	1158	0	-	2397	U	0	0	62	51.89	20	0	0.31	0.337	1	0	0	1	O	0.31
AF-P02461-F1	A	P	1159	0	-	2397	U	0	0	134	48.5	20	0	0.67	0.289	1	0	0	1	O	0.67
AF-P02461-F1	A	I	1160	0	-	2397	U	0	0	173	60.4	20	0	0.865	0.458	1	0	0	1	O	0.865
AF-P02461-F1	A	G	1161	0	-	2397	U	0	0	52	59.26	20	0	0.26	0.441	1	0	0	1	O	0.26
AF-P02461-F1	A	P	1162	0	-	2397	U	0	0	122	55.73	20	0	0.61	0.391	1	0	0	1	O	0.61
AF-P02461-F1	A	P	1163	0	-	2397	U	0	0	131	67.26	20	0	0.655	0.555	1	0	0	1	O	0.655
AF-P02461-F1	A	G	1164	0	-	2397	U	0	0	65	59.07	20	0	0.325	0.439	1	0	0	1	O	0.325
AF-P02461-F1	A	P	1165	0	-	2397	U	0	0	131	53.77	20	0	0.655	0.364	1	0	0	1	O	0.655
AF-P02461-F1	A	R	1166	0	-	2397	U	0	0	200	55.29	20	0	1	0.385	1	0	0	1	O	1
AF-P02461-F1	A	G	1167	0	-	2397	U	0	0	64	57.31	20	0	0.32	0.414	1	0	0	1	O	0.32
AF-P02461-F1	A	N	1168	0	-	2397	U	0	0	168	43.19	20	0	0.84	0.214	1	0	0	1	O	0.84
AF-P02461-F1	A	R	1169	0	-	2397	U	0	0	200	52.02	20	0	1	0.339	1	0	0	1	O	1
AF-P02461-F1	A	G	1170	0	-	2397	U	0	0	64	52.46	20	0	0.32	0.345	1	0	0	1	O	0.32
AF-P02461-F1	A	E	1171	0	-	2397	U	0	0	199	45.52	20	0	0.995	0.247	1	0	0	1	O	0.995
AF-P02461-F1	A	R	1172	0	-	2397	U	0	0	200	48.59	20	0	1	0.29	1	0	0	1	O	1
AF-P02461-F1	A	G	1173	0	-	2397	U	0	0	61	54.91	20	0	0.305	0.38	1	0	0	1	O	0.305
AF-P02461-F1	A	S	1174	0	-	2397	U	0	0	121	50.47	20	0	0.605	0.317	1	0	0	1	O	0.605
AF-P02461-F1	A	E	1175	0	-	2397	U	0	0	158	53.4	20	0	0.79	0.358	1	0	0	1	O	0.79
AF-P02461-F1	A	G	1176	0	-	2397	U	0	0	62	52.6	20	0	0.31	0.347	1	0	0	1	O	0.31
AF-P02461-F1	A	S	1177	0	-	2397	U	0	0	119	52.54	20	0	0.595	0.346	1	0	0	1	O	0.595
AF-P02461-F1	A	P	1178	0	-	2397	U	0	0	117	61.44	20	0	0.585	0.472	1	0	0	1	O	0.585
AF-P02461-F1	A	G	1179	0	-	2397	U	0	0	68	52.37	20	0	0.34	0.344	1	0	0	1	O	0.34
AF-P02461-F1	A	H	1180	0	-	2397	U	0	0	187	55.96	20	0	0.935	0.395	1	0	0	1	O	0.935
AF-P02461-F1	A	P	1181	0	-	2397	U	0	0	124	64.84	20	0	0.62	0.52	1	0	0	1	O	0.62
AF-P02461-F1	A	G	1182	0	-	2397	U	0	0	69	54.58	20	0	0.345	0.375	1	0	0	1	O	0.345
AF-P02461-F1	A	Q	1183	0	-	2397	U	0	0	177	57.58	20	0	0.885	0.418	1	0	0	1	O	0.885
AF-P02461-F1	A	P	1184	0	-	2397	U	0	0	120	66.65	20	0	0.6	0.546	1	0	0	1	O	0.6
AF-P02461-F1	A	G	1185	0	-	2397	U	0	0	61	56.66	20	0	0.305	0.405	1	0	0	1	O	0.305
AF-P02461-F1	A	P	1186	0	-	2397	U	0	0	65	60.46	20	0	0.325	0.458	1	0	0	1	O	0.325
AF-P02461-F1	A	P	1187	0	-	2397	U	0	0	129	60.94	20	0	0.645	0.465	1	0	0	1	O	0.645
AF-P02461-F1	A	G	1188	0	-	2397	U	0	0	61	59.61	20	0	0.305	0.446	1	0	0	1	O	0.305
AF-P02461-F1	A	P	1189	0	-	2397	U	0	0	119	59.25	20	0	0.595	0.441	1	0	0	1	O	0.595
AF-P02461-F1	A	P	1190	0	-	2397	U	0	0	130	53.87	20	0	0.65	0.365	1	0	0	1	O	0.65
AF-P02461-F1	A	G	1191	0	-	2397	U	0	0	68	46.25	20	0	0.34	0.257	1	0	0	1	O	0.34
AF-P02461-F1	A	A	1192	0	-	2397	U	0	0	95	45.03	20	0	0.475	0.24	1	0	0	1	O	0.475
AF-P02461-F1	A	P	1193	0	-	2397	U	0	0	132	44.13	20	0	0.66	0.227	1	0	0	1	O	0.66
AF-P02461-F1	A	G	1194	0	-	2397	U	0	0	51	39.51	20	0	0.255	0.162	1	0	0	1	O	0.255
AF-P02461-F1	A	P	1195	0	-	2397	S	0	0	142	42.02	20	0	0.71	0.197	1	0	0	1	O	0.71
AF-P02461-F1	A	C	1196	0	-	2397	U	0	0	108	33.02	20	0	0.54	0.07	1	0	0	1	O	0.54
AF-P02461-F1	A	C	1197	0	-	2397	U	0	0	131	37.91	20	0	0.655	0.139	1	0	0	1	O	0.655
AF-P02461-F1	A	G	1198	0	-	2397	U	0	0	78	32.47	20	0	0.39	0.062	1	0	0	1	O	0.39
AF-P02461-F1	A	G	1199	0	-	2397	U	0	0	47	34.83	20	0	0.235	0.096	1	0	0	1	O	0.235
AF-P02461-F1	A	V	1200	0	-	2397	U	0	0	125	37.76	20	0	0.625	0.137	1	0	0	1	O	0.625
AF-P02461-F1	A	G	1201	0	-	2397	U	0	0	68	32.86	20	0	0.34	0.068	1	0	0	1	O	0.34
AF-P02461-F1	A	A	1202	0	-	2397	U	0	0	92	35.83	20	0	0.46	0.11	1	0	0	1	O	0.46
AF-P02461-F1	A	A	1203	0	-	2397	T	0	0	116	34.34	20	0	0.58	0.089	1	0	0	1	O	0.58
AF-P02461-F1	A	A	1204	0	-	2397	T	0	0	89	35.37	20	0	0.445	0.103	1	0	0	1	O	0.445
AF-P02461-F1	A	I	1205	0	-	2397	S	0	0	162	38.18	20	0	0.81	0.143	1	0	0	1	O	0.81
AF-P02461-F1	A	A	1206	0	-	2397	U	0	0	110	38.01	20	0	0.55	0.141	1	0	0	1	O	0.55
AF-P02461-F1	A	G	1207	0	-	2397	U	0	0	79	31.32	20	0	0.395	0.046	1	0	0	1	O	0.395
AF-P02461-F1	A	I	1208	0	-	2397	U	0	0	172	39.09	20	0	0.86	0.156	1	0	0	1	O	0.86
AF-P02461-F1	A	G	1209	0	-	2397	U	0	0	78	35.13	20	0	0.39	0.1	1	0	0	1	O	0.39
AF-P02461-F1	A	G	1210	0	-	2397	U	0	0	83	36.56	20	0	0.415	0.12	1	0	0	1	O	0.415
AF-P02461-F1	A	E	1211	0	-	2397	U	0	0	159	36.58	20	0	0.795	0.12	1	0	0	1	O	0.795
AF-P02461-F1	A	K	1212	0	-	2397	U	0	0	164	37.96	20	0	0.82	0.14	1	0	0	1	O	0.82
AF-P02461-F1	A	A	1213	0	-	2397	U	0	0	107	34.62	20	0	0.535	0.093	1	0	0	1	O	0.535
AF-P02461-F1	A	G	1214	0	-	2397	U	0	0	82	31.4	20	0	0.41	0.047	1	0	0	1	O	0.41
AF-P02461-F1	A	G	1215	0	-	2397	U	0	0	73	34.02	20	0	0.365	0.084	1	0	0	1	O	0.365
AF-P02461-F1	A	F	1216	0	-	2397	U	0	0	200	35.07	20	0	1	0.099	1	0	0	1	O	1
AF-P02461-F1	A	A	1217	0	-	2397	U	0	0	99	46.8	20	0	0.495	0.265	1	0	0	1	O	0.495
AF-P02461-F1	A	P	1218	0	-	2397	U	0	0	108	47.16	20	0	0.54	0.27	1	0	0	1	O	0.54
AF-P02461-F1	A	Y	1219	0	-	2397	U	0	0	200	43.82	20	0	1	0.223	1	0	0	1	O	1
AF-P02461-F1	A	Y	1220	0	-	2397	U	0	0	200	43.85	20	0	1	0.223	1	0	0	1	O	1
AF-P02461-F1	A	G	1221	1	M12.005	2397	U	0	0	67	41.7	20	0	0.335	0.193	1	0	0	1	O	0.335
AF-P02461-F1	A	D	1222	0	-	2397	U	0	0	167	42.74	20	0	0.835	0.208	1	0	0	1	O	0.835
AF-P02461-F1	A	E	1223	0	-	2397	U	0	0	175	50.84	20	0	0.875	0.322	1	0	0	1	O	0.875
AF-P02461-F1	A	P	1224	0	-	2397	U	0	0	115	50.45	20	0	0.575	0.317	1	0	0	1	O	0.575
AF-P02461-F1	A	M	1225	0	-	2397	U	0	0	141	54	20	0	0.705	0.367	1	0	0	1	O	0.705
AF-P02461-F1	A	D	1226	0	-	2397	U	0	0	156	60.22	20	0	0.78	0.455	1	0	0	1	O	0.78
AF-P02461-F1	A	F	1227	0	-	2397	U	0	0	173	62.91	20	0	0.865	0.493	1	0	0	1	O	0.865
AF-P02461-F1	A	K	1228	0	-	2397	S	0	0	187	65.1	20	0	0.935	0.524	1	0	0	1	O	0.935
AF-P02461-F1	A	I	1229	0	-	2397	U	0	0	116	75.93	20	0	0.58	0.677	1	0	0	1	O	0.58
AF-P02461-F1	A	N	1230	0	-	2397	U	0	0	75	84.74	20	0	0.375	0.802	1	0	0	1	O	0.375
AF-P02461-F1	A	T	1231	0	-	2397	H	0	0	97	87.97	0	0	0.485	0.848	0	0	1	0	H	0.485
AF-P02461-F1	A	D	1232	0	-	2397	H	0	0	102	90.88	0	0	0.51	0.889	0	0	1	0	H	0.51
AF-P02461-F1	A	E	1233	0	-	2397	H	0	0	100	88.91	0	0	0.5	0.861	0	0	1	0	H	0.5
AF-P02461-F1	A	I	1234	0	-	2397	H	0	0	80	91.36	0	0	0.4	0.896	0	0	1	0	H	0.4
AF-P02461-F1	A	M	1235	0	-	2397	H	0	0	105	93.19	0	0	0.525	0.922	0	0	1	0	H	0.525
AF-P02461-F1	A	T	1236	0	-	2397	H	0	0	88	93.43	0	0	0.44	0.925	0	0	1	0	H	0.44
AF-P02461-F1	A	S	1237	0	-	2397	H	0	0	71	93.54	0	0	0.355	0.927	0	0	1	0	H	0.355
AF-P02461-F1	A	L	1238	0	-	2397	H	0	0	90	93.98	0	0	0.45	0.933	0	0	1	0	H	0.45
AF-P02461-F1	A	K	1239	0	-	2397	H	0	0	145	94.36	0	0	0.725	0.938	0	0	1	0	H	0.725
AF-P02461-F1	A	S	1240	0	-	2397	H	0	0	45	93.98	0	0	0.225	0.933	0	0	1	0	H	0.225
AF-P02461-F1	A	V	1241	0	-	2397	H	0	0	69	94.47	0	0	0.345	0.94	0	0	1	0	H	0.345
AF-P02461-F1	A	N	1242	0	-	2397	H	0	0	100	94.38	0	0	0.5	0.939	0	0	1	0	H	0.5
AF-P02461-F1	A	G	1243	0	-	2397	H	0	0	28	92.61	0	0	0.14	0.914	0	0	1	0	H	0.14
AF-P02461-F1	A	Q	1244	0	-	2397	H	0	0	88	91.42	0	0	0.44	0.897	0	0	1	0	H	0.44
AF-P02461-F1	A	I	1245	0	-	2397	H	0	0	82	94.7	0	0	0.41	0.943	0	0	1	0	H	0.41
AF-P02461-F1	A	E	1246	0	-	2397	H	0	0	136	92.21	0	0	0.68	0.908	0	0	1	0	H	0.68
AF-P02461-F1	A	S	1247	0	-	2397	H	0	0	39	92.04	0	0	0.195	0.906	0	0	1	0	H	0.195
AF-P02461-F1	A	L	1248	0	-	2397	H	0	0	124	90.65	0	0	0.62	0.886	0	0	1	0	H	0.62
AF-P02461-F1	A	I	1249	0	-	2397	H	0	0	132	93.26	0	0	0.66	0.923	0	0	1	0	H	0.66
AF-P02461-F1	A	S	1250	0	-	2397	S	0	0	30	94.21	12	0	0.15	0.936	0.6	0	0	1	O	0.15
AF-P02461-F1	A	P	1251	0	-	2397	U	0	0	29	95.24	12	0	0.145	0.951	0.6	0	0	1	O	0.145
AF-P02461-F1	A	D	1252	0	-	2397	U	0	0	76	94.94	12	0	0.38	0.947	0.6	0	0	1	O	0.38
AF-P02461-F1	A	G	1253	0	-	2397	S	0	0	2	96.43	12	0	0.01	0.968	0.6	0	0	1	O	0.01
AF-P02461-F1	A	S	1254	0	-	2397	B	1	0	39	96.79	12	0	0.195	0.973	0.6	0	0	1	O	0.195
AF-P02461-F1	A	R	1255	0	-	2397	T	0	0	125	95.86	12	0	0.625	0.96	0.6	0	0	1	O	0.625
AF-P02461-F1	A	K	1256	0	-	2397	T	0	0	135	95.3	12	0	0.675	0.952	0.6	0	0	1	O	0.675
AF-P02461-F1	A	N	1257	0	-	2397	B	1	0	30	96.23	12	0	0.15	0.965	0.6	0	0	1	O	0.15
AF-P02461-F1	A	P	1258	0	-	2397	U	0	0	6	97.71	12	0	0.03	0.986	0.6	0	0	1	O	0.03
AF-P02461-F1	A	A	1259	0	-	2397	B	1	0	4	97.45	12	0	0.02	0.982	0.6	0	0	1	O	0.02
AF-P02461-F1	A	R	1260	0	-	2397	S	0	0	96	97.07	12	0	0.48	0.977	0.6	0	0	1	O	0.48
AF-P02461-F1	A	N	1261	0	-	2397	S	0	0	7	97.38	12	0	0.035	0.981	0.6	0	0	1	O	0.035
AF-P02461-F1	A	C	1262	0	-	2397	H	0	0	0	98.3	0	0	0	0.994	0	0	1	0	H	0
AF-P02461-F1	A	R	1263	0	-	2397	H	0	0	80	97.71	0	0	0.4	0.986	0	0	1	0	H	0.4
AF-P02461-F1	A	D	1264	0	-	2397	H	0	0	64	96.95	0	0	0.32	0.975	0	0	1	0	H	0.32
AF-P02461-F1	A	L	1265	0	-	2397	H	0	0	2	97.26	0	0	0.01	0.979	0	0	1	0	H	0.01
AF-P02461-F1	A	K	1266	0	-	2397	H	0	0	61	97.15	0	0	0.305	0.978	0	0	1	0	H	0.305
AF-P02461-F1	A	F	1267	0	-	2397	H	0	0	138	96.05	0	0	0.69	0.962	0	0	1	0	H	0.69
AF-P02461-F1	A	C	1268	0	-	2397	H	0	0	67	95.06	0	0	0.335	0.948	0	0	1	0	H	0.335
AF-P02461-F1	A	H	1269	0	-	2397	U	0	0	34	95.69	6	0	0.17	0.957	0.3	0	0	1	O	0.17
AF-P02461-F1	A	P	1270	0	-	2397	T	0	0	105	94.77	6	0	0.525	0.944	0.3	0	0	1	O	0.525
AF-P02461-F1	A	E	1271	0	-	2397	T	0	0	128	95.18	6	0	0.64	0.95	0.3	0	0	1	O	0.64
AF-P02461-F1	A	L	1272	0	-	2397	U	0	0	49	95.84	6	0	0.245	0.959	0.3	0	0	1	O	0.245
AF-P02461-F1	A	K	1273	0	-	2397	U	0	0	167	97.71	6	0	0.835	0.986	0.3	0	0	1	O	0.835
AF-P02461-F1	A	S	1274	0	-	2397	S	0	0	40	98.18	6	0	0.2	0.992	0.3	0	0	1	O	0.2
AF-P02461-F1	A	G	1275	0	-	2397	E	0	1	19	97.46	0	0	0.095	0.982	0	1	0	0	B	0.095
AF-P02461-F1	A	E	1276	0	-	2397	E	0	1	107	98.1	0	0	0.535	0.991	0	1	0	0	B	0.535
AF-P02461-F1	A	Y	1277	0	-	2397	E	0	1	39	98.24	0	0	0.195	0.993	0	1	0	0	B	0.195
AF-P02461-F1	A	W	1278	0	-	2397	E	0	1	39	98.19	0	0	0.195	0.993	0	1	0	0	B	0.195
AF-P02461-F1	A	V	1279	0	-	2397	E	1	1	0	98.15	0	0	0	0.992	0	1	0	0	B	0
AF-P02461-F1	A	D	1280	0	-	2397	U	0	0	9	97.78	10	0	0.045	0.987	0.5	0	0	1	O	0.045
AF-P02461-F1	A	P	1281	0	-	2397	S	0	0	0	97.61	10	0	0	0.984	0.5	0	0	1	O	0
AF-P02461-F1	A	N	1282	0	-	2397	S	0	0	34	96.06	10	0	0.17	0.962	0.5	0	0	1	O	0.17
AF-P02461-F1	A	Q	1283	0	-	2397	U	0	0	103	94.57	10	0	0.515	0.941	0.5	0	0	1	O	0.515
AF-P02461-F1	A	G	1284	0	-	2397	S	0	0	73	93.11	10	0	0.365	0.921	0.5	0	0	1	O	0.365
AF-P02461-F1	A	C	1285	0	-	2397	U	0	0	78	92.3	10	0	0.39	0.909	0.5	0	0	1	O	0.39
AF-P02461-F1	A	K	1286	0	-	2397	T	0	0	61	93.59	10	0	0.305	0.928	0.5	0	0	1	O	0.305
AF-P02461-F1	A	L	1287	0	-	2397	T	0	0	147	92.79	10	0	0.735	0.916	0.5	0	0	1	O	0.735
AF-P02461-F1	A	D	1288	0	-	2397	S	0	0	33	95.45	10	0	0.165	0.954	0.5	0	0	1	O	0.165
AF-P02461-F1	A	A	1289	0	-	2397	U	0	0	3	96.88	10	0	0.015	0.974	0.5	0	0	1	O	0.015
AF-P02461-F1	A	I	1290	0	-	2397	E	1	0	2	97.35	0	0	0.01	0.981	0	1	0	0	B	0.01
AF-P02461-F1	A	K	1291	0	-	2397	E	1	0	69	97.92	0	0	0.345	0.989	0	1	0	0	B	0.345
AF-P02461-F1	A	V	1292	0	-	2397	E	1	0	4	98.18	0	0	0.02	0.992	0	1	0	0	B	0.02
AF-P02461-F1	A	F	1293	0	-	2397	E	1	1	92	98.45	0	0	0.46	0.996	0	1	0	0	B	0.46
AF-P02461-F1	A	C	1294	0	-	2397	E	1	1	0	98.58	0	0	0	0.998	0	1	0	0	B	0
AF-P02461-F1	A	N	1295	0	-	2397	U	0	0	28	97.85	6	0	0.14	0.988	0.3	0	0	1	O	0.14
AF-P02461-F1	A	M	1296	0	-	2397	T	0	0	16	97.23	6	0	0.08	0.979	0.3	0	0	1	O	0.08
AF-P02461-F1	A	E	1297	0	-	2397	T	0	0	142	96.25	6	0	0.71	0.965	0.3	0	0	1	O	0.71
AF-P02461-F1	A	T	1298	0	-	2397	T	0	0	52	96.15	6	0	0.26	0.964	0.3	0	0	1	O	0.26
AF-P02461-F1	A	G	1299	0	-	2397	U	0	0	1	96.46	6	0	0.005	0.968	0.3	0	0	1	O	0.005
AF-P02461-F1	A	E	1300	0	-	2397	U	0	0	39	98.21	6	0	0.195	0.993	0.3	0	0	1	O	0.195
AF-P02461-F1	A	T	1301	0	-	2397	E	1	1	1	98.67	0	0	0.005	0.999	0	1	0	0	B	0.005
AF-P02461-F1	A	C	1302	0	-	2397	E	1	1	8	98.43	0	0	0.04	0.996	0	1	0	0	B	0.04
AF-P02461-F1	A	I	1303	0	-	2397	E	0	1	3	98.09	0	0	0.015	0.991	0	1	0	0	B	0.015
AF-P02461-F1	A	S	1304	0	-	2397	U	0	0	60	96.95	1	0	0.3	0.975	0.05	0	0	1	O	0.3
AF-P02461-F1	A	A	1305	0	-	2397	E	1	0	5	96.39	0	0	0.025	0.967	0	1	0	0	B	0.025
AF-P02461-F1	A	N	1306	0	-	2397	E	1	0	64	94.31	0	0	0.32	0.938	0	1	0	0	B	0.32
AF-P02461-F1	A	P	1307	0	-	2397	S	0	0	54	94.66	2	0	0.27	0.943	0.1	0	0	1	O	0.27
AF-P02461-F1	A	L	1308	0	-	2397	U	0	0	97	95.07	2	0	0.485	0.948	0.1	0	0	1	O	0.485
AF-P02461-F1	A	N	1309	0	-	2397	E	1	0	85	95.57	0	0	0.425	0.956	0	1	0	0	B	0.425
AF-P02461-F1	A	V	1310	0	-	2397	E	1	0	2	97.85	0	0	0.01	0.988	0	1	0	0	B	0.01
AF-P02461-F1	A	P	1311	0	-	2397	E	0	0	75	97.51	0	0	0.375	0.983	0	1	0	0	B	0.375
AF-P02461-F1	A	R	1312	0	-	2397	E	0	0	127	97.91	0	0	0.635	0.989	0	1	0	0	B	0.635
AF-P02461-F1	A	K	1313	0	-	2397	E	1	0	83	96.53	0	0	0.415	0.969	0	1	0	0	B	0.415
AF-P02461-F1	A	H	1314	0	-	2397	U	0	0	58	97.19	14	0	0.29	0.978	0.7	0	0	1	O	0.29
AF-P02461-F1	A	W	1315	0	-	2397	U	0	0	21	97.19	14	0	0.105	0.978	0.7	0	0	1	O	0.105
AF-P02461-F1	A	W	1316	0	-	2397	U	0	0	74	96.35	14	0	0.37	0.967	0.7	0	0	1	O	0.37
AF-P02461-F1	A	T	1317	0	-	2397	B	1	0	96	94.11	14	0	0.48	0.935	0.7	0	0	1	O	0.48
AF-P02461-F1	A	D	1318	0	-	2397	U	0	0	74	91.3	14	0	0.37	0.895	0.7	0	0	1	O	0.37
AF-P02461-F1	A	S	1319	0	-	2397	U	0	0	131	83.1	14	0	0.655	0.779	0.7	0	0	1	O	0.655
AF-P02461-F1	A	S	1320	0	-	2397	U	0	0	51	81.97	14	0	0.255	0.763	0.7	0	0	1	O	0.255
AF-P02461-F1	A	A	1321	0	-	2397	S	0	0	108	79.14	14	0	0.54	0.723	0.7	0	0	1	O	0.54
AF-P02461-F1	A	E	1322	0	-	2397	S	0	0	123	85.85	14	0	0.615	0.818	0.7	0	0	1	O	0.615
AF-P02461-F1	A	K	1323	0	-	2397	U	0	0	60	91.1	14	0	0.3	0.892	0.7	0	0	1	O	0.3
AF-P02461-F1	A	K	1324	0	-	2397	U	0	0	114	95.09	14	0	0.57	0.949	0.7	0	0	1	O	0.57
AF-P02461-F1	A	H	1325	0	-	2397	U	0	0	67	97.41	14	0	0.335	0.982	0.7	0	0	1	O	0.335
AF-P02461-F1	A	V	1326	0	-	2397	U	0	0	21	97.34	14	0	0.105	0.981	0.7	0	0	1	O	0.105
AF-P02461-F1	A	W	1327	0	-	2397	U	0	0	30	97.94	14	0	0.15	0.989	0.7	0	0	1	O	0.15
AF-P02461-F1	A	F	1328	0	-	2397	H	0	0	0	98.22	0	0	0	0.993	0	0	1	0	H	0
AF-P02461-F1	A	G	1329	0	-	2397	H	0	0	23	95.94	0	0	0.115	0.961	0	0	1	0	H	0.115
AF-P02461-F1	A	E	1330	0	-	2397	H	0	0	144	95.32	0	0	0.72	0.952	0	0	1	0	H	0.72
AF-P02461-F1	A	S	1331	0	-	2397	H	0	0	58	96.23	0	0	0.29	0.965	0	0	1	0	H	0.29
AF-P02461-F1	A	M	1332	0	-	2397	S	0	0	13	97.02	7	0	0.065	0.976	0.35	0	0	1	O	0.065
AF-P02461-F1	A	D	1333	0	-	2397	T	0	0	148	94.82	7	0	0.74	0.945	0.35	0	0	1	O	0.74
AF-P02461-F1	A	G	1334	0	-	2397	T	0	0	61	94.66	7	0	0.305	0.943	0.35	0	0	1	O	0.305
AF-P02461-F1	A	G	1335	0	-	2397	U	0	0	22	95.35	7	0	0.11	0.952	0.35	0	0	1	O	0.11
AF-P02461-F1	A	F	1336	0	-	2397	U	0	0	58	96.73	7	0	0.29	0.972	0.35	0	0	1	O	0.29
AF-P02461-F1	A	Q	1337	0	-	2397	U	0	0	118	96.16	7	0	0.59	0.964	0.35	0	0	1	O	0.59
AF-P02461-F1	A	F	1338	0	-	2397	U	0	0	9	96.2	7	0	0.045	0.964	0.35	0	0	1	O	0.045
AF-P02461-F1	A	S	1339	0	-	2397	E	1	0	40	95.89	0	0	0.2	0.96	0	1	0	0	B	0.2
AF-P02461-F1	A	Y	1340	0	-	2397	E	1	0	10	96.78	0	0	0.05	0.973	0	1	0	0	B	0.05
AF-P02461-F1	A	G	1341	0	-	2397	S	0	0	13	93.92	6	0	0.065	0.932	0.3	0	0	1	O	0.065
AF-P02461-F1	A	N	1342	0	-	2397	U	0	0	15	93.52	6	0	0.075	0.927	0.3	0	0	1	O	0.075
AF-P02461-F1	A	P	1343	0	-	2397	T	0	0	98	92.41	6	0	0.49	0.911	0.3	0	0	1	O	0.49
AF-P02461-F1	A	E	1344	0	-	2397	T	0	0	117	94.09	6	0	0.585	0.935	0.3	0	0	1	O	0.585
AF-P02461-F1	A	L	1345	0	-	2397	S	0	0	31	93.96	6	0	0.155	0.933	0.3	0	0	1	O	0.155
AF-P02461-F1	A	P	1346	0	-	2397	U	0	0	71	94.59	6	0	0.355	0.942	0.3	0	0	1	O	0.355
AF-P02461-F1	A	E	1347	0	-	2397	H	0	0	137	92.58	0	0	0.685	0.913	0	0	1	0	H	0.685
AF-P02461-F1	A	D	1348	0	-	2397	H	0	0	116	92.22	0	0	0.58	0.908	0	0	1	0	H	0.58
AF-P02461-F1	A	V	1349	0	-	2397	H	0	0	35	95.16	0	0	0.175	0.95	0	0	1	0	H	0.175
AF-P02461-F1	A	L	1350	0	-	2397	H	0	0	14	94.84	0	0	0.07	0.945	0	0	1	0	H	0.07
AF-P02461-F1	A	D	1351	0	-	2397	H	0	0	98	94.5	0	0	0.49	0.94	0	0	1	0	H	0.49
AF-P02461-F1	A	V	1352	0	-	2397	H	0	0	65	96.59	0	0	0.325	0.97	0	0	1	0	H	0.325
AF-P02461-F1	A	H	1353	0	-	2397	H	0	0	1	96.59	0	0	0.005	0.97	0	0	1	0	H	0.005
AF-P02461-F1	A	L	1354	0	-	2397	H	0	0	12	96.42	0	0	0.06	0.968	0	0	1	0	H	0.06
AF-P02461-F1	A	A	1355	0	-	2397	H	0	0	51	96.77	0	0	0.255	0.973	0	0	1	0	H	0.255
AF-P02461-F1	A	F	1356	0	-	2397	H	0	0	76	98	0	0	0.38	0.99	0	0	1	0	H	0.38
AF-P02461-F1	A	L	1357	0	-	2397	H	0	0	0	97.49	0	0	0	0.983	0	0	1	0	H	0
AF-P02461-F1	A	R	1358	0	-	2397	H	0	0	46	97.22	0	0	0.23	0.979	0	0	1	0	H	0.23
AF-P02461-F1	A	L	1359	0	-	2397	H	0	0	139	96.68	0	0	0.695	0.971	0	0	1	0	H	0.695
AF-P02461-F1	A	L	1360	0	-	2397	H	0	0	44	96.35	0	0	0.22	0.967	0	0	1	0	H	0.22
AF-P02461-F1	A	S	1361	0	-	2397	U	0	0	18	97.25	3	0	0.09	0.979	0.15	0	0	1	O	0.09
AF-P02461-F1	A	S	1362	0	-	2397	S	0	0	71	95.87	3	0	0.355	0.96	0.15	0	0	1	O	0.355
AF-P02461-F1	A	R	1363	0	-	2397	U	0	0	131	96.78	3	0	0.655	0.973	0.15	0	0	1	O	0.655
AF-P02461-F1	A	A	1364	0	-	2397	E	1	1	3	98	0	0	0.015	0.99	0	1	0	0	B	0.015
AF-P02461-F1	A	S	1365	0	-	2397	E	1	1	20	98.13	0	0	0.1	0.992	0	1	0	0	B	0.1
AF-P02461-F1	A	Q	1366	0	-	2397	E	1	1	3	98.22	0	0	0.015	0.993	0	1	0	0	B	0.015
AF-P02461-F1	A	N	1367	0	-	2397	E	1	0	59	97.03	0	0	0.295	0.976	0	1	0	0	B	0.295
AF-P02461-F1	A	I	1368	0	-	2397	E	1	1	2	98.12	0	0	0.01	0.992	0	1	0	0	B	0.01
AF-P02461-F1	A	T	1369	0	-	2397	E	1	1	28	98.55	0	0	0.14	0.998	0	1	0	0	B	0.14
AF-P02461-F1	A	Y	1370	0	-	2397	E	1	1	1	98.7	0	0	0.005	1	0	1	0	0	B	0.005
AF-P02461-F1	A	H	1371	0	-	2397	E	1	1	13	98.71	0	0	0.065	1	0	1	0	0	B	0.065
AF-P02461-F1	A	C	1372	0	-	2397	E	1	1	5	98.48	0	0	0.025	0.997	0	1	0	0	B	0.025
AF-P02461-F1	A	K	1373	0	-	2397	E	0	1	52	98.55	0	0	0.26	0.998	0	1	0	0	B	0.26
AF-P02461-F1	A	N	1374	0	-	2397	S	0	0	21	97.55	17	0	0.105	0.984	0.85	0	0	1	O	0.105
AF-P02461-F1	A	S	1375	0	-	2397	U	0	0	2	98.2	17	0	0.01	0.993	0.85	0	0	1	O	0.01
AF-P02461-F1	A	I	1376	0	-	2397	U	0	0	3	98.2	17	0	0.015	0.993	0.85	0	0	1	O	0.015
AF-P02461-F1	A	A	1377	0	-	2397	U	0	0	0	98.16	17	0	0	0.992	0.85	0	0	1	O	0
AF-P02461-F1	A	Y	1378	0	-	2397	S	0	0	58	98.45	17	0	0.29	0.996	0.85	0	0	1	O	0.29
AF-P02461-F1	A	M	1379	0	-	2397	U	0	0	68	97.71	17	0	0.34	0.986	0.85	0	0	1	O	0.34
AF-P02461-F1	A	D	1380	0	-	2397	B	1	0	9	97.8	17	0	0.045	0.987	0.85	0	0	1	O	0.045
AF-P02461-F1	A	Q	1381	0	-	2397	T	0	0	126	96.01	17	0	0.63	0.962	0.85	0	0	1	O	0.63
AF-P02461-F1	A	A	1382	0	-	2397	T	0	0	98	95.66	17	0	0.49	0.957	0.85	0	0	1	O	0.49
AF-P02461-F1	A	S	1383	0	-	2397	T	0	0	60	95.68	17	0	0.3	0.957	0.85	0	0	1	O	0.3
AF-P02461-F1	A	G	1384	0	-	2397	T	0	0	61	95.43	17	0	0.305	0.954	0.85	0	0	1	O	0.305
AF-P02461-F1	A	N	1385	0	-	2397	B	1	0	42	96.49	17	0	0.21	0.969	0.85	0	0	1	O	0.21
AF-P02461-F1	A	V	1386	0	-	2397	U	0	0	11	97.68	17	0	0.055	0.985	0.85	0	0	1	O	0.055
AF-P02461-F1	A	K	1387	0	-	2397	T	0	0	159	96.64	17	0	0.795	0.971	0.85	0	0	1	O	0.795
AF-P02461-F1	A	K	1388	0	-	2397	T	0	0	57	97.23	17	0	0.285	0.979	0.85	0	0	1	O	0.285
AF-P02461-F1	A	A	1389	0	-	2397	U	0	0	7	98.26	17	0	0.035	0.994	0.85	0	0	1	O	0.035
AF-P02461-F1	A	L	1390	0	-	2397	U	0	0	2	98.3	17	0	0.01	0.994	0.85	0	0	1	O	0.01
AF-P02461-F1	A	K	1391	0	-	2397	E	1	0	38	98.47	0	0	0.19	0.997	0	1	0	0	B	0.19
AF-P02461-F1	A	L	1392	0	-	2397	E	1	1	1	98.47	0	0	0.005	0.997	0	1	0	0	B	0.005
AF-P02461-F1	A	M	1393	0	-	2397	E	1	1	35	98.13	0	0	0.175	0.992	0	1	0	0	B	0.175
AF-P02461-F1	A	G	1394	0	-	2397	E	1	1	0	96.73	0	0	0	0.972	0	1	0	0	B	0
AF-P02461-F1	A	S	1395	0	-	2397	T	0	0	42	95.84	3	0	0.21	0.959	0.15	0	0	1	O	0.21
AF-P02461-F1	A	N	1396	0	-	2397	T	0	0	65	93.94	3	0	0.325	0.932	0.15	0	0	1	O	0.325
AF-P02461-F1	A	E	1397	0	-	2397	T	0	0	176	93.83	3	0	0.88	0.931	0.15	0	0	1	O	0.88
AF-P02461-F1	A	G	1398	0	-	2397	E	1	0	7	94.54	0	0	0.035	0.941	0	1	0	0	B	0.035
AF-P02461-F1	A	E	1399	0	-	2397	E	1	0	51	97.68	0	0	0.255	0.985	0	1	0	0	B	0.255
AF-P02461-F1	A	F	1400	0	-	2397	E	1	0	0	98.14	0	0	0	0.992	0	1	0	0	B	0
AF-P02461-F1	A	K	1401	0	-	2397	B	1	0	74	97.81	10	0	0.37	0.987	0.5	0	0	1	O	0.37
AF-P02461-F1	A	A	1402	0	-	2397	S	0	0	18	97.45	10	0	0.09	0.982	0.5	0	0	1	O	0.09
AF-P02461-F1	A	E	1403	0	-	2397	S	0	0	125	96.24	10	0	0.625	0.965	0.5	0	0	1	O	0.625
AF-P02461-F1	A	G	1404	0	-	2397	S	0	0	68	95.11	10	0	0.34	0.949	0.5	0	0	1	O	0.34
AF-P02461-F1	A	N	1405	0	-	2397	U	0	0	95	94.61	10	0	0.475	0.942	0.5	0	0	1	O	0.475
AF-P02461-F1	A	S	1406	0	-	2397	T	0	0	98	93.41	10	0	0.49	0.925	0.5	0	0	1	O	0.49
AF-P02461-F1	A	K	1407	0	-	2397	T	0	0	149	93.82	10	0	0.745	0.931	0.5	0	0	1	O	0.745
AF-P02461-F1	A	F	1408	0	-	2397	S	0	0	60	96.51	10	0	0.3	0.969	0.5	0	0	1	O	0.3
AF-P02461-F1	A	T	1409	0	-	2397	B	1	0	45	97.79	10	0	0.225	0.987	0.5	0	0	1	O	0.225
AF-P02461-F1	A	Y	1410	0	-	2397	U	0	0	10	98.04	10	0	0.05	0.991	0.5	0	0	1	O	0.05
AF-P02461-F1	A	T	1411	0	-	2397	E	1	0	74	97.82	0	0	0.37	0.987	0	1	0	0	B	0.37
AF-P02461-F1	A	V	1412	0	-	2397	E	1	0	36	97.98	0	0	0.18	0.99	0	1	0	0	B	0.18
AF-P02461-F1	A	L	1413	0	-	2397	E	0	0	98	97.17	0	0	0.49	0.978	0	1	0	0	B	0.49
AF-P02461-F1	A	E	1414	0	-	2397	E	1	0	82	97.25	0	0	0.41	0.979	0	1	0	0	B	0.41
AF-P02461-F1	A	D	1415	0	-	2397	E	1	0	42	97.87	0	0	0.21	0.988	0	1	0	0	B	0.21
AF-P02461-F1	A	G	1416	0	-	2397	U	0	0	32	97.54	9	0	0.16	0.983	0.45	0	0	1	O	0.16
AF-P02461-F1	A	C	1417	0	-	2397	U	0	0	1	98.11	9	0	0.005	0.992	0.45	0	0	1	O	0.005
AF-P02461-F1	A	T	1418	0	-	2397	S	0	0	36	97.8	9	0	0.18	0.987	0.45	0	0	1	O	0.18
AF-P02461-F1	A	K	1419	0	-	2397	S	0	0	123	97.59	9	0	0.615	0.984	0.45	0	0	1	O	0.615
AF-P02461-F1	A	H	1420	0	-	2397	U	0	0	80	97.68	9	0	0.4	0.985	0.45	0	0	1	O	0.4
AF-P02461-F1	A	T	1421	0	-	2397	U	0	0	90	96.22	9	0	0.45	0.965	0.45	0	0	1	O	0.45
AF-P02461-F1	A	G	1422	0	-	2397	S	0	0	37	95.5	9	0	0.185	0.955	0.45	0	0	1	O	0.185
AF-P02461-F1	A	E	1423	0	-	2397	S	0	0	144	97.24	9	0	0.72	0.979	0.45	0	0	1	O	0.72
AF-P02461-F1	A	W	1424	0	-	2397	U	0	0	95	98.23	9	0	0.475	0.993	0.45	0	0	1	O	0.475
AF-P02461-F1	A	S	1425	0	-	2397	E	1	0	42	98.21	0	0	0.21	0.993	0	1	0	0	B	0.21
AF-P02461-F1	A	K	1426	0	-	2397	E	1	0	77	98.35	0	0	0.385	0.995	0	1	0	0	B	0.385
AF-P02461-F1	A	T	1427	0	-	2397	E	1	1	0	98.62	0	0	0	0.999	0	1	0	0	B	0
AF-P02461-F1	A	V	1428	0	-	2397	E	1	1	18	98.57	0	0	0.09	0.998	0	1	0	0	B	0.09
AF-P02461-F1	A	F	1429	0	-	2397	E	1	1	1	98.55	0	0	0.005	0.998	0	1	0	0	B	0.005
AF-P02461-F1	A	E	1430	0	-	2397	E	1	1	17	98.26	0	0	0.085	0.994	0	1	0	0	B	0.085
AF-P02461-F1	A	Y	1431	0	-	2397	E	1	0	5	98.3	0	0	0.025	0.994	0	1	0	0	B	0.025
AF-P02461-F1	A	R	1432	0	-	2397	E	1	0	179	97.68	0	0	0.895	0.985	0	1	0	0	B	0.895
AF-P02461-F1	A	T	1433	0	-	2397	E	1	0	11	97.33	0	0	0.055	0.98	0	1	0	0	B	0.055
AF-P02461-F1	A	R	1434	0	-	2397	S	0	0	200	96.89	2	0	1	0.974	0.1	0	0	1	O	1
AF-P02461-F1	A	K	1435	0	-	2397	U	0	0	146	96.68	2	0	0.73	0.971	0.1	0	0	1	O	0.73
AF-P02461-F1	A	A	1436	0	-	2397	G	0	0	6	96.41	0	0	0.03	0.967	0	0	1	0	H	0.03
AF-P02461-F1	A	V	1437	0	-	2397	G	0	0	94	96.5	0	0	0.47	0.969	0	0	1	0	H	0.47
AF-P02461-F1	A	R	1438	0	-	2397	G	0	0	28	97.25	0	0	0.14	0.979	0	0	1	0	H	0.14
AF-P02461-F1	A	L	1439	0	-	2397	U	0	0	0	98.09	2	0	0	0.991	0.1	0	0	1	O	0
AF-P02461-F1	A	P	1440	0	-	2397	S	0	0	2	97.99	2	0	0.01	0.99	0.1	0	0	1	O	0.01
AF-P02461-F1	A	I	1441	0	-	2397	E	1	0	1	98.14	0	0	0.005	0.992	0	1	0	0	B	0.005
AF-P02461-F1	A	V	1442	0	-	2397	E	0	0	30	97.59	0	0	0.15	0.984	0	1	0	0	B	0.15
AF-P02461-F1	A	D	1443	0	-	2397	E	1	0	3	98.14	0	0	0.015	0.992	0	1	0	0	B	0.015
AF-P02461-F1	A	I	1444	0	-	2397	E	1	0	0	98.48	0	0	0	0.997	0	1	0	0	B	0
AF-P02461-F1	A	A	1445	0	-	2397	E	1	0	0	98.44	0	0	0	0.996	0	1	0	0	B	0
AF-P02461-F1	A	P	1446	0	-	2397	U	0	0	1	98.18	9	0	0.005	0.992	0.45	0	0	1	O	0.005
AF-P02461-F1	A	Y	1447	0	-	2397	S	0	0	65	97.65	9	0	0.325	0.985	0.45	0	0	1	O	0.325
AF-P02461-F1	A	D	1448	0	-	2397	S	0	0	7	96.73	9	0	0.035	0.972	0.45	0	0	1	O	0.035
AF-P02461-F1	A	I	1449	0	-	2397	U	0	0	11	96.86	9	0	0.055	0.974	0.45	0	0	1	O	0.055
AF-P02461-F1	A	G	1450	0	-	2397	B	1	0	4	95.04	9	0	0.02	0.948	0.45	0	0	1	O	0.02
AF-P02461-F1	A	G	1451	0	-	2397	S	0	0	17	94.72	9	0	0.085	0.944	0.45	0	0	1	O	0.085
AF-P02461-F1	A	P	1452	0	-	2397	T	0	0	116	93.57	9	0	0.58	0.927	0.45	0	0	1	O	0.58
AF-P02461-F1	A	D	1453	0	-	2397	T	0	0	80	95.24	9	1	0.4	0.951	0.45	0	0	1	O	0.4
AF-P02461-F1	A	Q	1454	0	-	2397	U	0	0	9	97.14	9	1	0.045	0.978	0.45	0	0	1	O	0.045
AF-P02461-F1	A	E	1455	0	-	2397	E	0	1	44	98.34	0	1	0.22	0.995	0	1	0	0	B	0.22
AF-P02461-F1	A	F	1456	0	-	2397	E	1	1	2	98.61	0	1	0.01	0.999	0	1	0	0	B	0.01
AF-P02461-F1	A	G	1457	0	-	2397	E	0	1	0	98.33	0	1	0	0.995	0	1	0	0	B	0
AF-P02461-F1	A	V	1458	0	-	2397	E	1	1	0	98.54	0	1	0	0.998	0	1	0	0	B	0
AF-P02461-F1	A	D	1459	0	-	2397	E	1	1	57	98.27	0	1	0.285	0.994	0	1	0	0	B	0.285
AF-P02461-F1	A	V	1460	0	-	2397	E	0	1	4	97.88	0	1	0.02	0.988	0	1	0	0	B	0.02
AF-P02461-F1	A	G	1461	0	-	2397	E	0	0	17	96.68	0	1	0.085	0.971	0	1	0	0	B	0.085
AF-P02461-F1	A	P	1462	0	-	2397	E	0	0	53	97.95	0	1	0.265	0.989	0	1	0	0	B	0.265
AF-P02461-F1	A	V	1463	0	-	2397	E	1	1	0	98.21	0	1	0	0.993	0	1	0	0	B	0
AF-P02461-F1	A	C	1464	0	-	2397	E	1	1	17	98.55	0	1	0.085	0.998	0	1	0	0	B	0.085
AF-P02461-F1	A	F	1465	0	-	2397	E	1	1	1	98.6	0	1	0.005	0.998	0	1	0	0	B	0.005
AF-P02461-F1	A	L	1466	0	-	2397	U	0	0	6	96.98	1	1	0.03	0.976	0.05	0	0	1	O	0.03
7AD7_A	A	I	683	0	-&-	2346&2526	U	0	0	140		1	1	0.7		0.05	0	0	1	O	0.7
7AD7_A	A	E	684	0	-&-	2346&2526	H	0	0	173		0	1	0.865		0	0	1	0	H	0.865
7AD7_A	A	E	685	0	-&-	2346&2526	H	0	0	167		0	1	0.835		0	0	1	0	H	0.835
7AD7_A	A	I	686	0	-&-	2346&2526	H	0	0	42		0	1	0.21		0	0	1	0	H	0.21
7AD7_A	A	A	687	0	-&-	2346&2526	H	0	0	50		0	1	0.25		0	0	1	0	H	0.25
7AD7_A	A	A	688	0	-&-	2346&2526	H	0	0	56		0	1	0.28		0	0	1	0	H	0.28
7AD7_A	A	K	689	0	-&-	2346&2526	H	0	0	119		0	1	0.595		0	0	1	0	H	0.595
7AD7_A	A	Y	690	0	-&-	2346&2526	T	0	0	29		6	1	0.145		0.3	0	0	1	O	0.145
7AD7_A	A	K	691	0	-&-	2346&2526	S	0	0	145		6	1	0.725		0.3	0	0	1	O	0.725
7AD7_A	A	H	692	0	-&-	2346&2526	S	0	0	193		6	0	0.965		0.3	0	0	1	O	0.965
7AD7_A	A	S	693	0	-&-	2346&2526	U	0	0	45		6	0	0.225		0.3	0	0	1	O	0.225
7AD7_A	A	V	694	0	-&-	2346&2526	T	0	0	145		6	0	0.725		0.3	0	0	1	O	0.725
7AD7_A	A	V	695	0	-&-	2346&2526	T	0	0	32		6	0	0.16		0.3	0	0	1	O	0.16
7AD7_A	A	K	696	0	-&-	2346&2526	H	0	0	30		0	0	0.15		0	0	1	0	H	0.15
7AD7_A	A	K	697	0	-&-	2346&2526	H	0	0	165		0	0	0.825		0	0	1	0	H	0.825
7AD7_A	A	C	698	0	-&-	2346&2526	H	0	0	11		0	0	0.055		0	0	1	0	H	0.055
7AD7_A	A	C	699	0	-&-	2346&2526	H	0	0	10		0	0	0.05		0	0	1	0	H	0.05
7AD7_A	A	Y	700	0	-&-	2346&2526	H	0	0	166		0	0	0.83		0	0	1	0	H	0.83
7AD7_A	A	D	701	0	-&-	2346&2526	H	0	0	20		0	0	0.1		0	0	1	0	H	0.1
7AD7_A	A	G	702	0	-&-	2346&2526	H	0	0	1		0	0	0.005		0	0	1	0	H	0.005
7AD7_A	A	A	703	0	-&-	2346&2526	H	0	0	42		0	0	0.21		0	0	1	0	H	0.21
7AD7_A	A	C	704	0	-&-	2346&2526	S	0	0	53		7	0	0.265		0.35	0	0	1	O	0.265
7AD7_A	A	V	705	0	-&-	2346&2526	U	0	0	124		7	0	0.62		0.35	0	0	1	O	0.62
7AD7_A	A	N	706	0	-&-	2346&2526	U	0	0	35		7	0	0.175		0.35	0	0	1	O	0.175
7AD7_A	A	N	707	0	-&-	2346&2526	T	0	0	142		7	0	0.71		0.35	0	0	1	O	0.71
7AD7_A	A	D	708	0	-&-	2346&2526	T	0	0	58		7	0	0.29		0.35	0	0	1	O	0.29
7AD7_A	A	E	709	0	-&-	2346&2526	S	0	0	34		7	0	0.17		0.35	0	0	1	O	0.17
7AD7_A	A	T	710	0	-&-	2346&2526	U	0	0	76		7	0	0.38		0.35	0	0	1	O	0.38
7AD7_A	A	C	711	0	-&-	2346&2526	H	0	0	22		0	0	0.11		0	0	1	0	H	0.11
7AD7_A	A	E	712	0	-&-	2346&2526	H	0	0	156		0	0	0.78		0	0	1	0	H	0.78
7AD7_A	A	Q	713	0	-&-	2346&2526	H	0	0	97		0	0	0.485		0	0	1	0	H	0.485
7AD7_A	A	R	714	0	-&-	2346&2526	H	0	0	11		0	0	0.055		0	0	1	0	H	0.055
7AD7_A	A	A	715	0	-&-	2346&2526	H	0	0	13		0	0	0.065		0	0	1	0	H	0.065
7AD7_A	A	A	716	0	-&-	2346&2526	T	0	0	81		6	0	0.405		0.3	0	0	1	O	0.405
7AD7_A	A	R	717	0	-&-	2346&2526	T	0	0	63		6	0	0.315		0.3	0	0	1	O	0.315
7AD7_A	A	I	718	0	-&-	2346&2526	U	0	0	12		6	0	0.06		0.3	0	0	1	O	0.06
7AD7_A	A	S	719	0	-&-	2346&2526	U	0	0	59		6	0	0.295		0.3	0	0	1	O	0.295
7AD7_A	A	L	720	0	-&-	2346&2526	S	0	0	110		6	0	0.55		0.3	0	0	1	O	0.55
7AD7_A	A	G	721	0	-&-	2346&2526	U	0	0	25		6	0	0.125		0.3	0	0	1	O	0.125
7AD7_A	A	P	722	0	-&-	2346&2526	H	0	0	111		0	0	0.555		0	0	1	0	H	0.555
7AD7_A	A	R	723	0	-&-	2346&2526	H	0	0	59		0	0	0.295		0	0	1	0	H	0.295
7AD7_A	A	C	724	0	-&-	2346&2526	H	0	0	4		0	0	0.02		0	0	1	0	H	0.02
7AD7_A	A	I	725	0	-&-	2346&2526	H	0	0	64		0	0	0.32		0	0	1	0	H	0.32
7AD7_A	A	K	726	0	-&-	2346&2526	H	0	0	155		0	0	0.775		0	0	1	0	H	0.775
7AD7_A	A	A	727	0	-&-	2346&2526	H	0	0	2		0	0	0.01		0	0	1	0	H	0.01
7AD7_A	A	F	728	0	-&-	2346&2526	H	0	0	0		0	0	0		0	0	1	0	H	0
7AD7_A	A	T	729	0	-&-	2346&2526	H	0	0	44		0	0	0.22		0	0	1	0	H	0.22
7AD7_A	A	E	730	0	-&-	2346&2526	H	0	0	87		0	0	0.435		0	0	1	0	H	0.435
7AD7_A	A	C	731	0	-&-	2346&2526	H	0	0	4		0	0	0.02		0	0	1	0	H	0.02
7AD7_A	A	C	732	0	-&-	2346&2526	H	0	0	4		0	0	0.02		0	0	1	0	H	0.02
7AD7_A	A	V	733	0	-&-	2346&2526	H	0	0	53		0	0	0.265		0	0	1	0	H	0.265
7AD7_A	A	V	734	0	-&-	2346&2526	H	0	0	43		0	0	0.215		0	0	1	0	H	0.215
7AD7_A	A	A	735	1	S08.020&-	2346&2526	H	0	0	37		0	0	0.185		0	0	1	0	H	0.185
7AD7_A	A	S	736	0	-&-	2346&2526	H	0	0	66		0	0	0.33		0	0	1	0	H	0.33
7AD7_A	A	Q	737	0	-&-	2346&2526	H	0	0	137		0	0	0.685		0	0	1	0	H	0.685
7AD7_A	A	L	738	0	-&-	2346&2526	H	0	0	95		0	0	0.475		0	0	1	0	H	0.475
7AD7_A	A	R	739	0	-&-	2346&2526	U	0	0	83		20	0	0.415		1	0	0	1	O	0.415
7AD7_A	A	A	740	0	-&-	2346&2526	U	0	0	140		20	0	0.7		1	0	0	1	O	0.7
7AD7_A	A	K	762	0	-&-	2346&2526	U	0	0	122		20	0	0.61		1	0	0	1	O	0.61
7AD7_A	A	P	763	0	-&-	2346&2526	U	0	0	144		20	0	0.72		1	0	0	1	O	0.72
7AD7_A	A	E	764	0	-&-	2346&2526	U	0	0	112		20	0	0.56		1	0	0	1	O	0.56
7AD7_A	A	I	765	0	-&-	2346&2526	U	0	0	113		20	0	0.565		1	0	0	1	O	0.565
7AD7_A	A	R	766	0	-&-	2346&2526	S	0	0	195		20	0	0.975		1	0	0	1	O	0.975
7AD7_A	A	S	767	0	-&-	2346&2526	U	0	0	72		20	0	0.36		1	0	0	1	O	0.36
7AD7_A	A	Y	768	0	-&-	2346&2526	U	0	0	200		20	0	1		1	0	0	1	O	1
7AD7_A	A	F	769	0	-&-	2346&2526	U	0	0	148		20	0	0.74		1	0	0	1	O	0.74
7AD7_A	A	P	770	0	-&-	2346&2526	U	0	0	56		20	0	0.28		1	0	0	1	O	0.28
7AD7_A	A	E	771	0	-&-	2346&2526	U	0	0	172		20	0	0.86		1	0	0	1	O	0.86
7AD7_A	A	S	772	0	-&-	2346&2526	U	0	0	89		20	0	0.445		1	0	0	1	O	0.445
7AD7_A	A	W	773	0	-&-	2346&2526	U	0	0	71		20	0	0.355		1	0	0	1	O	0.355
7AD7_A	A	L	774	0	-&-	2346&2526	U	0	0	50		20	0	0.25		1	0	0	1	O	0.25
7AD7_A	A	W	775	0	-&-	2346&2526	U	0	0	200		20	0	1		1	0	0	1	O	1
7AD7_A	A	E	776	0	-&-	2346&2526	U	0	0	108		20	0	0.54		1	0	0	1	O	0.54
7AD7_A	A	V	777	0	-&-	2346&2526	U	0	0	149		20	0	0.745		1	0	0	1	O	0.745
7AD7_A	A	H	778	0	-&-	2346&2526	U	0	0	71		20	0	0.355		1	0	0	1	O	0.355
7AD7_A	A	L	779	0	-&-	2346&2526	U	0	0	147		20	0	0.735		1	0	0	1	O	0.735
7AD7_A	A	V	780	0	-&-	2346&2526	U	0	0	84		20	0	0.42		1	0	0	1	O	0.42
7AD7_A	A	P	781	0	-&-	2346&2526	S	0	0	92		20	0	0.46		1	0	0	1	O	0.46
7AD7_A	A	R	782	0	-&-	2346&2526	S	0	0	200		20	0	1		1	0	0	1	O	1
7AD7_A	A	R	783	0	-&-	2346&2526	U	0	0	191		20	0	0.955		1	0	0	1	O	0.955
7AD7_A	A	K	784	0	-&-	2346&2526	U	0	0	111		20	0	0.555		1	0	0	1	O	0.555
7AD7_A	A	Q	785	0	-&-	2346&2526	U	0	0	151		20	0	0.755		1	0	0	1	O	0.755
7AD7_A	A	L	786	0	-&-	2346&2526	U	0	0	68		20	0	0.34		1	0	0	1	O	0.34
7AD7_A	A	Q	787	0	-&-	2346&2526	U	0	0	157		20	0	0.785		1	0	0	1	O	0.785
7AD7_A	A	F	788	0	-&-	2346&2526	U	0	0	100		20	0	0.5		1	0	0	1	O	0.5
7AD7_A	A	A	789	0	-&-	2346&2526	U	0	0	91		20	0	0.455		1	0	0	1	O	0.455
7AD7_A	A	L	790	0	-&-	2346&2526	U	0	0	83		20	0	0.415		1	0	0	1	O	0.415
7AD7_A	A	P	791	0	-&-	2346&2526	U	0	0	39		20	0	0.195		1	0	0	1	O	0.195
7AD7_A	A	D	792	0	-&-	2346&2526	S	0	0	165		20	0	0.825		1	0	0	1	O	0.825
7AD7_A	A	S	793	0	-&-	2346&2526	S	0	0	38		20	0	0.19		1	0	0	1	O	0.19
7AD7_A	A	L	794	0	-&-	2346&2526	U	0	0	79		20	0	0.395		1	0	0	1	O	0.395
7AD7_A	A	T	795	0	-&-	2346&2526	U	0	0	35		20	0	0.175		1	0	0	1	O	0.175
7AD7_A	A	T	796	0	-&-	2346&2526	E	1	0	86		0	0	0.43		0	1	0	0	B	0.43
7AD7_A	A	W	797	0	-&-	2346&2526	E	1	0	31		0	0	0.155		0	1	0	0	B	0.155
7AD7_A	A	E	798	0	-&-	2346&2526	E	1	0	99		0	0	0.495		0	1	0	0	B	0.495
7AD7_A	A	I	799	0	-&-	2346&2526	E	1	0	52		0	0	0.26		0	1	0	0	B	0.26
7AD7_A	A	Q	800	0	-&-	2346&2526	U	0	0	127		2	0	0.635		0.1	0	0	1	O	0.635
7AD7_A	A	G	801	0	-&-	2346&2526	U	0	0	35		2	0	0.175		0.1	0	0	1	O	0.175
7AD7_A	A	V	802	0	-&-	2346&2526	E	1	0	94		0	0	0.47		0	1	0	0	B	0.47
7AD7_A	A	G	803	0	-&-	2346&2526	E	1	0	36		0	0	0.18		0	1	0	0	B	0.18
7AD7_A	A	I	804	0	-&-	2346&2526	E	1	0	126		0	0	0.63		0	1	0	0	B	0.63
7AD7_A	A	S	805	0	-&-	2346&2526	E	1	0	72		0	0	0.36		0	1	0	0	B	0.36
7AD7_A	A	N	806	0	-&-	2346&2526	T	0	0	179		2	0	0.895		0.1	0	0	1	O	0.895
7AD7_A	A	T	807	0	-&-	2346&2526	T	0	0	136		2	0	0.68		0.1	0	0	1	O	0.68
7AD7_A	A	G	808	0	-&-	2346&2526	E	1	0	37		0	0	0.185		0	1	0	0	B	0.185
7AD7_A	A	I	809	0	-&-	2346&2526	E	1	0	119		0	0	0.595		0	1	0	0	B	0.595
7AD7_A	A	C	810	0	-&-	2346&2526	E	1	0	88		0	0	0.44		0	1	0	0	B	0.44
7AD7_A	A	V	811	0	-&-	2346&2526	E	1	0	109		0	0	0.545		0	1	0	0	B	0.545
7AD7_A	A	A	812	0	-&-	2346&2526	U	0	0	47		3	0	0.235		0.15	0	0	1	O	0.235
7AD7_A	A	D	813	0	-&-	2346&2526	U	0	0	154		3	0	0.77		0.15	0	0	1	O	0.77
7AD7_A	A	T	814	0	-&-	2346&2526	U	0	0	71		3	0	0.355		0.15	0	0	1	O	0.355
7AD7_A	A	V	815	0	-&-	2346&2526	E	1	0	84		0	0	0.42		0	1	0	0	B	0.42
7AD7_A	A	K	816	0	-&-	2346&2526	E	1	0	159		0	0	0.795		0	1	0	0	B	0.795
7AD7_A	A	A	817	0	-&-	2346&2526	E	1	0	30		0	0	0.15		0	1	0	0	B	0.15
7AD7_A	A	K	818	0	-&-	2346&2526	E	1	0	152		0	0	0.76		0	1	0	0	B	0.76
7AD7_A	A	V	819	0	-&-	2346&2526	U	0	0	32		4	0	0.16		0.2	0	0	1	O	0.16
7AD7_A	A	F	820	0	-&-	2346&2526	U	0	0	99		4	0	0.495		0.2	0	0	1	O	0.495
7AD7_A	A	K	821	0	-&-	2346&2526	U	0	0	85		4	0	0.425		0.2	0	0	1	O	0.425
7AD7_A	A	D	822	0	-&-	2346&2526	S	0	0	79		4	0	0.395		0.2	0	0	1	O	0.395
7AD7_A	A	V	823	0	-&-	2346&2526	E	1	0	24		0	0	0.12		0	1	0	0	B	0.12
7AD7_A	A	F	824	0	-&-	2346&2526	E	1	0	6		0	0	0.03		0	1	0	0	B	0.03
7AD7_A	A	L	825	0	-&-	2346&2526	E	1	0	7		0	0	0.035		0	1	0	0	B	0.035
7AD7_A	A	E	826	0	-&-	2346&2526	E	1	0	84		0	0	0.42		0	1	0	0	B	0.42
7AD7_A	A	M	827	0	-&-	2346&2526	E	1	0	3		0	0	0.015		0	1	0	0	B	0.015
7AD7_A	A	N	828	0	-&-	2346&2526	E	1	0	105		0	0	0.525		0	1	0	0	B	0.525
7AD7_A	A	I	829	0	-&-	2346&2526	U	0	0	38		4	0	0.19		0.2	0	0	1	O	0.19
7AD7_A	A	P	830	0	-&-	2346&2526	U	0	0	25		4	0	0.125		0.2	0	0	1	O	0.125
7AD7_A	A	Y	831	0	-&-	2346&2526	S	0	0	125		4	0	0.625		0.2	0	0	1	O	0.625
7AD7_A	A	S	832	0	-&-	2346&2526	U	0	0	31		4	0	0.155		0.2	0	0	1	O	0.155
7AD7_A	A	V	833	0	-&-	2346&2526	E	1	0	0		0	0	0		0	1	0	0	B	0
7AD7_A	A	V	834	0	-&-	2346&2526	E	1	0	18		0	0	0.09		0	1	0	0	B	0.09
7AD7_A	A	R	835	0	-&-	2346&2526	T	0	0	30		3	0	0.15		0.15	0	0	1	O	0.15
7AD7_A	A	G	836	0	-&-	2346&2526	T	0	0	17		3	0	0.085		0.15	0	0	1	O	0.085
7AD7_A	A	E	837	0	-&-	2346&2526	U	0	0	1		3	0	0.005		0.15	0	0	1	O	0.005
7AD7_A	A	Q	838	0	-&-	2346&2526	E	1	0	85		0	0	0.425		0	1	0	0	B	0.425
7AD7_A	A	I	839	0	-&-	2346&2526	E	1	1	1		0	0	0.005		0	1	0	0	B	0.005
7AD7_A	A	Q	840	0	-&-	2346&2526	E	0	1	33		0	0	0.165		0	1	0	0	B	0.165
7AD7_A	A	L	841	0	-&-	2346&2526	E	0	1	0		0	0	0		0	1	0	0	B	0
7AD7_A	A	K	842	0	-&-	2346&2526	E	1	1	62		0	0	0.31		0	1	0	0	B	0.31
7AD7_A	A	G	843	0	-&-	2346&2526	E	1	1	1		0	0	0.005		0	1	0	0	B	0.005
7AD7_A	A	T	844	0	-&-	2346&2526	E	1	1	28		0	0	0.14		0	1	0	0	B	0.14
7AD7_A	A	V	845	0	-&-	2346&2526	E	1	1	0		0	0	0		0	1	0	0	B	0
7AD7_A	A	Y	846	0	-&-	2346&2526	E	1	1	64		0	0	0.32		0	1	0	0	B	0.32
7AD7_A	A	N	847	0	-&-	2346&2526	E	1	1	1		0	0	0.005		0	1	0	0	B	0.005
7AD7_A	A	Y	848	0	-&-	2346&2526	U	0	0	117		5	0	0.585		0.25	0	0	1	O	0.585
7AD7_A	A	R	849	0	-&-	2346&2526	S	0	0	87		5	0	0.435		0.25	0	0	1	O	0.435
7AD7_A	A	T	850	0	-&-	2346&2526	S	0	0	128		5	0	0.64		0.25	0	0	1	O	0.64
7AD7_A	A	S	851	0	-&-	2346&2526	S	0	0	73		5	0	0.365		0.25	0	0	1	O	0.365
7AD7_A	A	G	852	0	-&-	2346&2526	U	0	0	46		5	0	0.23		0.25	0	0	1	O	0.23
7AD7_A	A	M	853	0	-&-	2346&2526	E	1	0	28		0	0	0.14		0	1	0	0	B	0.14
7AD7_A	A	Q	854	0	-&-	2346&2526	E	1	0	63		0	0	0.315		0	1	0	0	B	0.315
7AD7_A	A	F	855	0	-&-	2346&2526	E	1	0	1		0	0	0.005		0	1	0	0	B	0.005
7AD7_A	A	C	856	0	-&-	2346&2526	E	1	0	0		0	0	0		0	1	0	0	B	0
7AD7_A	A	V	857	0	-&-	2346&2526	E	1	0	6		0	0	0.03		0	1	0	0	B	0.03
7AD7_A	A	K	858	0	-&-	2346&2526	E	1	0	77		0	0	0.385		0	1	0	0	B	0.385
7AD7_A	A	M	859	0	-&-	2346&2526	E	1	0	38		0	0	0.19		0	1	0	0	B	0.19
7AD7_A	A	S	860	0	-&-	2346&2526	U	0	0	44		5	0	0.22		0.25	0	0	1	O	0.22
7AD7_A	A	A	861	0	-&-	2346&2526	U	0	0	70		5	0	0.35		0.25	0	0	1	O	0.35
7AD7_A	A	V	862	0	-&-	2346&2526	U	0	0	42		5	0	0.21		0.25	0	0	1	O	0.21
7AD7_A	A	E	863	0	-&-	2346&2526	S	0	0	177		5	0	0.885		0.25	0	0	1	O	0.885
7AD7_A	A	G	864	0	-&-	2346&2526	S	0	0	3		5	0	0.015		0.25	0	0	1	O	0.015
7AD7_A	A	I	865	0	-&-	2346&2526	E	1	0	13		0	0	0.065		0	1	0	0	B	0.065
7AD7_A	A	C	866	0	-&-	2346&2526	E	1	0	61		0	0	0.305		0	1	0	0	B	0.305
7AD7_A	A	T	867	0	-&-	2346&2526	U	0	0	113		5	0	0.565		0.25	0	0	1	O	0.565
7AD7_A	A	K	882	0	-&-	2346&2526	U	0	0	200		5	0	1		0.25	0	0	1	O	1
7AD7_A	A	C	883	0	-&-	2346&2526	U	0	0	43		5	0	0.215		0.25	0	0	1	O	0.215
7AD7_A	A	V	884	0	-&-	2346&2526	U	0	0	95		5	0	0.475		0.25	0	0	1	O	0.475
7AD7_A	A	R	885	0	-&-	2346&2526	U	0	0	102		5	0	0.51		0.25	0	0	1	O	0.51
7AD7_A	A	Q	886	0	-&-	2346&2526	E	1	0	51		0	0	0.255		0	1	0	0	B	0.255
7AD7_A	A	K	887	0	-&-	2346&2526	E	1	0	153		0	0	0.765		0	1	0	0	B	0.765
7AD7_A	A	V	888	0	-&-	2346&2526	E	1	0	3		0	0	0.015		0	1	0	0	B	0.015
7AD7_A	A	E	889	0	-&-	2346&2526	U	0	0	157		3	0	0.785		0.15	0	0	1	O	0.785
7AD7_A	A	G	890	0	-&-	2346&2526	T	0	0	25		3	0	0.125		0.15	0	0	1	O	0.125
7AD7_A	A	S	891	0	-&-	2346&2526	T	0	0	82		3	0	0.41		0.15	0	0	1	O	0.41
7AD7_A	A	S	892	0	-&-	2346&2526	E	1	0	55		0	0	0.275		0	1	0	0	B	0.275
7AD7_A	A	S	893	0	-&-	2346&2526	E	1	0	58		0	0	0.29		0	1	0	0	B	0.29
7AD7_A	A	H	894	0	-&-	2346&2526	E	1	0	78		0	0	0.39		0	1	0	0	B	0.39
7AD7_A	A	L	895	0	-&-	2346&2526	E	1	0	96		0	0	0.48		0	1	0	0	B	0.48
7AD7_A	A	V	896	0	-&-	2346&2526	E	1	0	3		0	0	0.015		0	1	0	0	B	0.015
7AD7_A	A	T	897	0	-&-	2346&2526	E	1	0	64		0	0	0.32		0	1	0	0	B	0.32
7AD7_A	A	F	898	0	-&-	2346&2526	E	1	0	41		0	0	0.205		0	1	0	0	B	0.205
7AD7_A	A	T	899	0	-&-	2346&2526	E	1	0	63		0	0	0.315		0	1	0	0	B	0.315
7AD7_A	A	V	900	0	-&-	2346&2526	E	1	0	1		0	0	0.005		0	1	0	0	B	0.005
7AD7_A	A	L	901	0	-&-	2346&2526	E	1	0	47		0	0	0.235		0	1	0	0	B	0.235
7AD7_A	A	P	902	0	-&-	2346&2526	E	1	0	0		0	0	0		0	1	0	0	B	0
7AD7_A	A	L	903	0	-&-	2346&2526	U	0	0	100		3	0	0.5		0.15	0	0	1	O	0.5
7AD7_A	A	E	904	0	-&-	2346&2526	S	0	0	100		3	0	0.5		0.15	0	0	1	O	0.5
7AD7_A	A	I	905	0	-&-	2346&2526	U	0	0	66		3	0	0.33		0.15	0	0	1	O	0.33
7AD7_A	A	G	906	0	-&-	2346&2526	E	0	1	26		0	0	0.13		0	1	0	0	B	0.13
7AD7_A	A	L	907	0	-&-	2346&2526	E	0	1	107		0	0	0.535		0	1	0	0	B	0.535
7AD7_A	A	H	908	0	-&-	2346&2526	E	0	1	20		0	0	0.1		0	1	0	0	B	0.1
7AD7_A	A	N	909	0	-&-	2346&2526	E	0	1	99		0	0	0.495		0	1	0	0	B	0.495
7AD7_A	A	I	910	0	-&-	2346&2526	E	0	1	4		0	0	0.02		0	1	0	0	B	0.02
7AD7_A	A	N	911	0	-&-	2346&2526	E	0	1	56		0	0	0.28		0	1	0	0	B	0.28
7AD7_A	A	F	912	0	-&-	2346&2526	E	1	1	0		0	0	0		0	1	0	0	B	0
7AD7_A	A	S	913	0	-&-	2346&2526	E	1	1	26		0	0	0.13		0	1	0	0	B	0.13
7AD7_A	A	L	914	0	-&-	2346&2526	E	1	1	5		0	0	0.025		0	1	0	0	B	0.025
7AD7_A	A	E	915	0	-&-	2346&2526	E	1	1	41		0	0	0.205		0	1	0	0	B	0.205
7AD7_A	A	T	916	0	-&-	2346&2526	U	0	0	27		4	0	0.135		0.2	0	0	1	O	0.135
7AD7_A	A	W	917	0	-&-	2346&2526	S	0	0	172		4	0	0.86		0.2	0	0	1	O	0.86
7AD7_A	A	F	918	0	-&-	2346&2526	S	0	0	138		4	0	0.69		0.2	0	0	1	O	0.69
7AD7_A	A	G	919	0	-&-	2346&2526	U	0	0	34		4	0	0.17		0.2	0	0	1	O	0.17
7AD7_A	A	K	920	0	-&-	2346&2526	E	0	1	150		0	0	0.75		0	1	0	0	B	0.75
7AD7_A	A	E	921	0	-&-	2346&2526	E	0	1	63		0	0	0.315		0	1	0	0	B	0.315
7AD7_A	A	I	922	0	-&-	2346&2526	E	0	1	115		0	0	0.575		0	1	0	0	B	0.575
7AD7_A	A	L	923	0	-&-	2346&2526	E	0	1	34		0	0	0.17		0	1	0	0	B	0.17
7AD7_A	A	V	924	0	-&-	2346&2526	E	0	1	96		0	0	0.48		0	1	0	0	B	0.48
7AD7_A	A	K	925	0	-&-	2346&2526	E	0	1	68		0	0	0.34		0	1	0	0	B	0.34
7AD7_A	A	T	926	0	-&-	2346&2526	E	0	1	62		0	0	0.31		0	1	0	0	B	0.31
7AD7_A	A	L	927	0	-&-	2346&2526	E	0	1	1		0	0	0.005		0	1	0	0	B	0.005
7AD7_A	A	R	928	0	-&-	2346&2526	E	0	1	95		0	0	0.475		0	1	0	0	B	0.475
7AD7_A	A	V	929	0	-&-	2346&2526	E	1	1	3		0	0	0.015		0	1	0	0	B	0.015
7AD7_A	A	V	930	0	-&-	2346&2526	E	1	0	42		0	0	0.21		0	1	0	0	B	0.21
7AD7_A	A	P	931	0	-&-	2346&2526	U	0	0	20		3	0	0.1		0.15	0	0	1	O	0.1
7AD7_A	A	E	932	0	-&-	2346&2526	S	0	0	48		3	0	0.24		0.15	0	0	1	O	0.24
7AD7_A	A	G	933	0	-&-	2346&2526	S	0	0	26		3	0	0.13		0.15	0	0	1	O	0.13
7AD7_A	A	V	934	0	-&-	2346&2526	E	1	0	11		0	0	0.055		0	1	0	0	B	0.055
7AD7_A	A	K	935	0	-&-	2346&2526	E	1	0	96		0	0	0.48		0	1	0	0	B	0.48
7AD7_A	A	R	936	0	-&-	2346&2526	E	1	0	56		0	0	0.28		0	1	0	0	B	0.28
7AD7_A	A	E	937	0	-&-	2346&2526	E	1	0	57		0	0	0.285		0	1	0	0	B	0.285
7AD7_A	A	S	938	0	-&-	2346&2526	E	1	0	61		0	0	0.305		0	1	0	0	B	0.305
7AD7_A	A	Y	939	0	-&-	2346&2526	E	1	0	78		0	0	0.39		0	1	0	0	B	0.39
7AD7_A	A	S	940	0	-&-	2346&2526	E	1	0	59		0	0	0.295		0	1	0	0	B	0.295
7AD7_A	A	G	941	0	-&-	2346&2526	E	1	0	19		0	0	0.095		0	1	0	0	B	0.095
7AD7_A	A	V	942	0	-&-	2346&2526	E	1	0	17		0	0	0.085		0	1	0	0	B	0.085
7AD7_A	A	T	943	0	-&-	2346&2526	E	1	0	7		0	0	0.035		0	1	0	0	B	0.035
7AD7_A	A	L	944	0	-&-	2346&2526	E	1	0	0		0	0	0		0	1	0	0	B	0
7AD7_A	A	D	945	0	-&-	2346&2526	B	1	0	4		11	0	0.02		0.55	0	0	1	O	0.02
7AD7_A	A	P	946	0	-&-	2346&2526	T	0	0	0		11	0	0		0.55	0	0	1	O	0
7AD7_A	A	R	947	0	-&-	2346&2526	T	0	0	131		11	0	0.655		0.55	0	0	1	O	0.655
7AD7_A	A	G	948	0	-&-	2346&2526	U	0	0	17		11	0	0.085		0.55	0	0	1	O	0.085
7AD7_A	A	I	949	0	-&-	2346&2526	T	0	0	95		11	0	0.475		0.55	0	0	1	O	0.475
7AD7_A	A	Y	950	0	-&-	2346&2526	T	0	0	26		11	0	0.13		0.55	0	0	1	O	0.13
7AD7_A	A	G	951	0	-&-	2346&2526	S	0	0	57		11	0	0.285		0.55	0	0	1	O	0.285
7AD7_A	A	T	952	0	-&-	2346&2526	S	0	0	61		11	0	0.305		0.55	0	0	1	O	0.305
7AD7_A	A	I	953	0	-&-	2346&2526	U	0	0	109		11	0	0.545		0.55	0	0	1	O	0.545
7AD7_A	A	S	954	0	-&-	2346&2526	B	1	0	17		11	0	0.085		0.55	0	0	1	O	0.085
7AD7_A	A	R	955	0	-&-	2346&2526	U	0	0	85		11	0	0.425		0.55	0	0	1	O	0.425
7AD7_A	A	R	956	0	-&-	2346&2526	E	1	0	155		0	0	0.775		0	1	0	0	B	0.775
7AD7_A	A	K	957	0	-&-	2346&2526	E	1	0	71		0	0	0.355		0	1	0	0	B	0.355
7AD7_A	A	E	958	0	-&-	2346&2526	E	1	0	54		0	0	0.27		0	1	0	0	B	0.27
7AD7_A	A	F	959	0	-&-	2346&2526	E	1	0	7		0	0	0.035		0	1	0	0	B	0.035
7AD7_A	A	P	960	0	-&-	2346&2526	U	0	0	76		14	0	0.38		0.7	0	0	1	O	0.38
7AD7_A	A	Y	961	0	-&-	2346&2526	U	0	0	56		14	0	0.28		0.7	0	0	1	O	0.28
7AD7_A	A	R	962	0	-&-	2346&2526	U	0	0	186		14	0	0.93		0.7	0	0	1	O	0.93
7AD7_A	A	I	963	0	-&-	2346&2526	U	0	0	99		14	0	0.495		0.7	0	0	1	O	0.495
7AD7_A	A	P	964	0	-&-	2346&2526	U	0	0	21		14	0	0.105		0.7	0	0	1	O	0.105
7AD7_A	A	L	965	0	-&-	2346&2526	T	0	0	172		14	0	0.86		0.7	0	0	1	O	0.86
7AD7_A	A	D	966	0	-&-	2346&2526	T	0	0	49		14	0	0.245		0.7	0	0	1	O	0.245
7AD7_A	A	L	967	0	-&-	2346&2526	B	1	0	37		14	0	0.185		0.7	0	0	1	O	0.185
7AD7_A	A	V	968	0	-&-	2346&2526	U	0	0	4		14	0	0.02		0.7	0	0	1	O	0.02
7AD7_A	A	P	969	0	-&-	2346&2526	T	0	0	97		14	0	0.485		0.7	0	0	1	O	0.485
7AD7_A	A	K	970	0	-&-	2346&2526	T	0	0	85		14	0	0.425		0.7	0	0	1	O	0.425
7AD7_A	A	T	971	0	-&-	2346&2526	U	0	0	19		14	0	0.095		0.7	0	0	1	O	0.095
7AD7_A	A	E	972	0	-&-	2346&2526	U	0	0	119		14	0	0.595		0.7	0	0	1	O	0.595
7AD7_A	A	I	973	0	-&-	2346&2526	U	0	0	12		14	0	0.06		0.7	0	0	1	O	0.06
7AD7_A	A	K	974	0	-&-	2346&2526	E	1	0	92		0	0	0.46		0	1	0	0	B	0.46
7AD7_A	A	R	975	0	-&-	2346&2526	E	1	1	9		0	0	0.045		0	1	0	0	B	0.045
7AD7_A	A	I	976	0	-&-	2346&2526	E	1	1	38		0	0	0.19		0	1	0	0	B	0.19
7AD7_A	A	L	977	0	-&-	2346&2526	E	1	1	2		0	0	0.01		0	1	0	0	B	0.01
7AD7_A	A	S	978	0	-&-	2346&2526	E	1	0	0		0	0	0		0	1	0	0	B	0
7AD7_A	A	V	979	0	-&-	2346&2526	E	1	0	6		0	0	0.03		0	1	0	0	B	0.03
7AD7_A	A	K	980	0	-&-	2346&2526	E	1	1	3		0	0	0.015		0	1	0	0	B	0.015
7AD7_A	A	G	981	0	-&-	2346&2526	S	0	0	0		4	0	0		0.2	0	0	1	O	0
7AD7_A	A	L	982	0	-&-	2346&2526	S	0	0	17		4	0	0.085		0.2	0	0	1	O	0.085
7AD7_A	A	L	983	0	-&-	2346&2526	T	0	0	15		4	0	0.075		0.2	0	0	1	O	0.075
7AD7_A	A	V	984	0	-&-	2346&2526	T	0	0	3		4	0	0.015		0.2	0	0	1	O	0.015
7AD7_A	A	G	985	0	-&-	2346&2526	H	0	0	0		0	0	0		0	0	1	0	H	0
7AD7_A	A	E	986	0	-&-	2346&2526	H	0	0	2		0	0	0.01		0	0	1	0	H	0.01
7AD7_A	A	I	987	0	-&-	2346&2526	H	0	0	3		0	0	0.015		0	0	1	0	H	0.015
7AD7_A	A	L	988	0	-&-	2346&2526	H	0	0	1		0	0	0.005		0	0	1	0	H	0.005
7AD7_A	A	S	989	0	-&-	2346&2526	H	0	0	10		0	0	0.05		0	0	1	0	H	0.05
7AD7_A	A	A	990	0	-&-	2346&2526	H	0	0	38		0	0	0.19		0	0	1	0	H	0.19
7AD7_A	A	V	991	0	-&-	2346&2526	H	0	0	7		0	0	0.035		0	0	1	0	H	0.035
7AD7_A	A	L	992	0	-&-	2346&2526	H	0	0	44		0	0	0.22		0	0	1	0	H	0.22
7AD7_A	A	S	993	0	-&-	2346&2526	U	0	0	76		11	0	0.38		0.55	0	0	1	O	0.38
7AD7_A	A	Q	994	0	-&-	2346&2526	U	0	0	128		11	0	0.64		0.55	0	0	1	O	0.64
7AD7_A	A	I	999	0	-&-	2346&2526	U	0	0	169		11	0	0.845		0.55	0	0	1	O	0.845
7AD7_A	A	L	1000	0	-&-	2346&2526	U	0	0	36		11	0	0.18		0.55	0	0	1	O	0.18
7AD7_A	A	T	1001	0	-&-	2346&2526	S	0	0	26		11	0	0.13		0.55	0	0	1	O	0.13
7AD7_A	A	H	1002	0	-&-	2346&2526	S	0	0	137		11	0	0.685		0.55	0	0	1	O	0.685
7AD7_A	A	L	1003	0	-&-	2346&2526	U	0	0	22		11	0	0.11		0.55	0	0	1	O	0.11
7AD7_A	A	P	1004	0	-&-	2346&2526	U	0	0	11		11	0	0.055		0.55	0	0	1	O	0.055
7AD7_A	A	K	1005	0	-&-	2346&2526	U	0	0	73		11	0	0.365		0.55	0	0	1	O	0.365
7AD7_A	A	G	1006	0	-&-	2346&2526	U	0	0	14		11	0	0.07		0.55	0	0	1	O	0.07
7AD7_A	A	S	1007	0	-&-	2346&2526	S	0	0	0		11	0	0		0.55	0	0	1	O	0
7AD7_A	A	A	1008	0	-&-	2346&2526	H	0	0	1		0	0	0.005		0	0	1	0	H	0.005
7AD7_A	A	E	1009	0	-&-	2346&2526	H	0	0	0		0	0	0		0	0	1	0	H	0
7AD7_A	A	A	1010	0	-&-	2346&2526	H	0	0	10		0	0	0.05		0	0	1	0	H	0.05
7AD7_A	A	E	1011	0	-&-	2346&2526	H	0	0	32		0	0	0.16		0	0	1	0	H	0.16
7AD7_A	A	L	1012	0	-&-	2346&2526	H	0	0	2		0	0	0.01		0	0	1	0	H	0.01
7AD7_A	A	M	1013	0	-&-	2346&2526	H	0	0	24		0	0	0.12		0	0	1	0	H	0.12
7AD7_A	A	S	1014	0	-&-	2346&2526	T	0	0	45		2	0	0.225		0.1	0	0	1	O	0.225
7AD7_A	A	V	1015	0	-&-	2346&2526	T	0	0	2		2	0	0.01		0.1	0	0	1	O	0.01
7AD7_A	A	V	1016	0	-&-	2346&2526	H	0	0	4		0	0	0.02		0	0	1	0	H	0.02
7AD7_A	A	P	1017	0	-&-	2346&2526	H	0	0	16		0	0	0.08		0	0	1	0	H	0.08
7AD7_A	A	V	1018	0	-&-	2346&2526	H	0	0	19		0	0	0.095		0	0	1	0	H	0.095
7AD7_A	A	F	1019	0	-&-	2346&2526	H	0	0	6		0	0	0.03		0	0	1	0	H	0.03
7AD7_A	A	Y	1020	0	-&-	2346&2526	H	0	0	2		0	0	0.01		0	0	1	0	H	0.01
7AD7_A	A	V	1021	0	-&-	2346&2526	H	0	0	2		0	0	0.01		0	0	1	0	H	0.01
7AD7_A	A	F	1022	0	-&-	2346&2526	H	0	0	2		0	0	0.01		0	0	1	0	H	0.01
7AD7_A	A	H	1023	0	-&-	2346&2526	H	0	0	18		0	0	0.09		0	0	1	0	H	0.09
7AD7_A	A	Y	1024	0	-&-	2346&2526	H	0	0	3		0	0	0.015		0	0	1	0	H	0.015
7AD7_A	A	L	1025	0	-&-	2346&2526	H	0	0	0		0	0	0		0	0	1	0	H	0
7AD7_A	A	E	1026	0	-&-	2346&2526	H	0	0	60		0	0	0.3		0	0	1	0	H	0.3
7AD7_A	A	T	1027	0	-&-	2346&2526	H	0	0	69		0	0	0.345		0	0	1	0	H	0.345
7AD7_A	A	G	1028	0	-&-	2346&2526	T	0	0	19		3	0	0.095		0.15	0	0	1	O	0.095
7AD7_A	A	N	1029	0	-&-	2346&2526	T	0	0	128		3	0	0.64		0.15	0	0	1	O	0.64
7AD7_A	A	H	1030	0	-&-	2346&2526	U	0	0	36		3	0	0.18		0.15	0	0	1	O	0.18
7AD7_A	A	W	1031	0	-&-	2346&2526	G	0	0	32		0	0	0.16		0	0	1	0	H	0.16
7AD7_A	A	N	1032	0	-&-	2346&2526	G	0	0	92		0	0	0.46		0	0	1	0	H	0.46
7AD7_A	A	I	1033	0	-&-	2346&2526	G	0	0	31		0	0	0.155		0	0	1	0	H	0.155
7AD7_A	A	F	1034	0	-&-	2346&2526	U	0	0	35		4	0	0.175		0.2	0	0	1	O	0.175
7AD7_A	A	H	1035	0	-&-	2346&2526	S	0	0	156		4	0	0.78		0.2	0	0	1	O	0.78
7AD7_A	A	S	1036	0	-&-	2346&2526	S	0	0	58		4	0	0.29		0.2	0	0	1	O	0.29
7AD7_A	A	D	1037	0	-&-	2346&2526	U	0	0	75		4	0	0.375		0.2	0	0	1	O	0.375
7AD7_A	A	P	1038	0	-&-	2346&2526	H	0	0	42		0	0	0.21		0	0	1	0	H	0.21
7AD7_A	A	L	1039	0	-&-	2346&2526	H	0	0	124		0	0	0.62		0	0	1	0	H	0.62
7AD7_A	A	I	1040	0	-&-	2346&2526	H	0	0	108		0	0	0.54		0	0	1	0	H	0.54
7AD7_A	A	E	1041	0	-&-	2346&2526	H	0	0	45		0	0	0.225		0	0	1	0	H	0.225
7AD7_A	A	K	1042	0	-&-	2346&2526	H	0	0	70		0	0	0.35		0	0	1	0	H	0.35
7AD7_A	A	Q	1043	0	-&-	2346&2526	H	0	0	111		0	0	0.555		0	0	1	0	H	0.555
7AD7_A	A	K	1044	0	-&-	2346&2526	H	0	0	111		0	0	0.555		0	0	1	0	H	0.555
7AD7_A	A	L	1045	0	-&-	2346&2526	H	0	0	4		0	0	0.02		0	0	1	0	H	0.02
7AD7_A	A	K	1046	0	-&-	2346&2526	H	0	0	73		0	0	0.365		0	0	1	0	H	0.365
7AD7_A	A	K	1047	0	-&-	2346&2526	H	0	0	125		0	0	0.625		0	0	1	0	H	0.625
7AD7_A	A	K	1048	0	-&-	2346&2526	H	0	0	54		0	0	0.27		0	0	1	0	H	0.27
7AD7_A	A	L	1049	0	-&-	2346&2526	H	0	0	0		0	0	0		0	0	1	0	H	0
7AD7_A	A	K	1050	0	-&-	2346&2526	H	0	0	117		0	0	0.585		0	0	1	0	H	0.585
7AD7_A	A	E	1051	0	-&-	2346&2526	H	0	0	95		0	0	0.475		0	0	1	0	H	0.475
7AD7_A	A	G	1052	0	-&-	2346&2526	H	0	0	13		0	0	0.065		0	0	1	0	H	0.065
7AD7_A	A	M	1053	0	-&-	2346&2526	H	0	0	5		0	0	0.025		0	0	1	0	H	0.025
7AD7_A	A	L	1054	0	-&-	2346&2526	H	0	0	84		0	0	0.42		0	0	1	0	H	0.42
7AD7_A	A	S	1055	0	-&-	2346&2526	T	0	0	43		2	0	0.215		0.1	0	0	1	O	0.215
7AD7_A	A	I	1056	0	-&-	2346&2526	T	0	0	3		2	0	0.015		0.1	0	0	1	O	0.015
7AD7_A	A	M	1057	0	-&-	2346&2526	G	0	0	105		0	0	0.525		0	0	1	0	H	0.525
7AD7_A	A	S	1058	0	-&-	2346&2526	G	0	0	67		0	0	0.335		0	0	1	0	H	0.335
7AD7_A	A	Y	1059	0	-&-	2346&2526	G	0	0	29		0	0	0.145		0	0	1	0	H	0.145
7AD7_A	A	R	1060	0	-&-	2346&2526	B	1	0	71		16	0	0.355		0.8	0	0	1	O	0.355
7AD7_A	A	N	1061	0	-&-	2346&2526	U	0	0	40		16	0	0.2		0.8	0	0	1	O	0.2
7AD7_A	A	A	1062	0	-&-	2346&2526	T	0	0	101		16	0	0.505		0.8	0	0	1	O	0.505
7AD7_A	A	D	1063	0	-&-	2346&2526	T	0	0	85		16	0	0.425		0.8	0	0	1	O	0.425
7AD7_A	A	Y	1064	0	-&-	2346&2526	S	0	0	78		16	0	0.39		0.8	0	0	1	O	0.39
7AD7_A	A	S	1065	0	-&-	2346&2526	U	0	0	1		16	0	0.005		0.8	0	0	1	O	0.005
7AD7_A	A	Y	1066	0	-&-	2346&2526	B	1	0	2		16	0	0.01		0.8	0	0	1	O	0.01
7AD7_A	A	S	1067	0	-&-	2346&2526	B	1	0	0		16	0	0		0.8	0	0	1	O	0
7AD7_A	A	V	1068	0	-&-	2346&2526	S	0	0	3		16	0	0.015		0.8	0	0	1	O	0.015
7AD7_A	A	W	1069	0	-&-	2346&2526	S	0	0	23		16	0	0.115		0.8	0	0	1	O	0.115
7AD7_A	A	K	1070	0	-&-	2346&2526	T	0	0	154		16	0	0.77		0.8	0	0	1	O	0.77
7AD7_A	A	G	1071	0	-&-	2346&2526	T	0	0	71		16	0	0.355		0.8	0	0	1	O	0.355
7AD7_A	A	G	1072	0	-&-	2346&2526	U	0	0	29		16	0	0.145		0.8	0	0	1	O	0.145
7AD7_A	A	S	1073	0	-&-	2346&2526	U	0	0	51		16	0	0.255		0.8	0	0	1	O	0.255
7AD7_A	A	A	1074	0	-&-	2346&2526	B	1	0	16		16	0	0.08		0.8	0	0	1	O	0.08
7AD7_A	A	S	1075	0	-&-	2346&2526	U	0	0	0		16	0	0		0.8	0	0	1	O	0
7AD7_A	A	T	1076	0	-&-	2346&2526	H	0	0	0		0	0	0		0	0	1	0	H	0
7AD7_A	A	W	1077	0	-&-	2346&2526	H	0	0	0		0	0	0		0	0	1	0	H	0
7AD7_A	A	L	1078	0	-&-	2346&2526	H	0	0	1		0	0	0.005		0	0	1	0	H	0.005
7AD7_A	A	T	1079	0	-&-	2346&2526	H	0	0	0		0	0	0		0	0	1	0	H	0
7AD7_A	A	A	1080	0	-&-	2346&2526	H	0	0	0		0	0	0		0	0	1	0	H	0
7AD7_A	A	F	1081	0	-&-	2346&2526	H	0	0	2		0	0	0.01		0	0	1	0	H	0.01
7AD7_A	A	A	1082	0	-&-	2346&2526	H	0	0	0		0	0	0		0	0	1	0	H	0
7AD7_A	A	L	1083	0	-&-	2346&2526	H	0	0	0		0	0	0		0	0	1	0	H	0
7AD7_A	A	R	1084	0	-&-	2346&2526	H	0	0	4		0	0	0.02		0	0	1	0	H	0.02
7AD7_A	A	V	1085	0	-&-	2346&2526	H	0	0	4		0	0	0.02		0	0	1	0	H	0.02
7AD7_A	A	L	1086	0	-&-	2346&2526	H	0	0	1		0	0	0.005		0	0	1	0	H	0.005
7AD7_A	A	G	1087	0	-&-	2346&2526	H	0	0	9		0	0	0.045		0	0	1	0	H	0.045
7AD7_A	A	Q	1088	0	-&-	2346&2526	H	0	0	11		0	0	0.055		0	0	1	0	H	0.055
7AD7_A	A	V	1089	0	-&-	2346&2526	H	0	0	1		0	0	0.005		0	0	1	0	H	0.005
7AD7_A	A	N	1090	0	-&-	2346&2526	T	0	0	39		7	0	0.195		0.35	0	0	1	O	0.195
7AD7_A	A	K	1091	0	-&-	2346&2526	T	0	0	115		7	0	0.575		0.35	0	0	1	O	0.575
7AD7_A	A	Y	1092	0	-&-	2346&2526	T	0	0	34		7	0	0.17		0.35	0	0	1	O	0.17
7AD7_A	A	V	1093	0	-&-	2346&2526	S	0	0	13		7	0	0.065		0.35	0	0	1	O	0.065
7AD7_A	A	E	1094	0	-&-	2346&2526	U	0	0	169		7	0	0.845		0.35	0	0	1	O	0.845
7AD7_A	A	Q	1095	0	-&-	2346&2526	U	0	0	33		7	0	0.165		0.35	0	0	1	O	0.165
7AD7_A	A	N	1096	0	-&-	2346&2526	U	0	0	100		7	0	0.5		0.35	0	0	1	O	0.5
7AD7_A	A	Q	1097	0	-&-	2346&2526	H	0	0	113		0	0	0.565		0	0	1	0	H	0.565
7AD7_A	A	N	1098	0	-&-	2346&2526	H	0	0	87		0	0	0.435		0	0	1	0	H	0.435
7AD7_A	A	S	1099	0	-&-	2346&2526	H	0	0	11		0	0	0.055		0	0	1	0	H	0.055
7AD7_A	A	I	1100	0	-&-	2346&2526	H	0	0	2		0	0	0.01		0	0	1	0	H	0.01
7AD7_A	A	C	1101	0	-&-	2346&2526	H	0	0	22		0	0	0.11		0	0	1	0	H	0.11
7AD7_A	A	N	1102	0	-&-	2346&2526	H	0	0	51		0	0	0.255		0	0	1	0	H	0.255
7AD7_A	A	S	1103	0	-&-	2346&2526	H	0	0	0		0	0	0		0	0	1	0	H	0
7AD7_A	A	L	1104	0	-&-	2346&2526	H	0	0	0		0	0	0		0	0	1	0	H	0
7AD7_A	A	L	1105	0	-&-	2346&2526	H	0	0	31		0	0	0.155		0	0	1	0	H	0.155
7AD7_A	A	W	1106	0	-&-	2346&2526	H	0	0	21		0	0	0.105		0	0	1	0	H	0.105
7AD7_A	A	L	1107	0	-&-	2346&2526	H	0	0	0		0	0	0		0	0	1	0	H	0
7AD7_A	A	V	1108	0	-&-	2346&2526	H	0	0	16		0	0	0.08		0	0	1	0	H	0.08
7AD7_A	A	E	1109	0	-&-	2346&2526	H	0	0	103		0	0	0.515		0	0	1	0	H	0.515
7AD7_A	A	N	1110	0	-&-	2346&2526	H	0	0	83		0	0	0.415		0	0	1	0	H	0.415
7AD7_A	A	Y	1111	0	-&-	2346&2526	S	0	0	37		20	0	0.185		1	0	0	1	O	0.185
7AD7_A	A	Q	1112	0	-&-	2346&2526	B	1	0	30		20	0	0.15		1	0	0	1	O	0.15
7AD7_A	A	L	1113	0	-&-	2346&2526	U	0	0	63		20	0	0.315		1	0	0	1	O	0.315
7AD7_A	A	D	1114	0	-&-	2346&2526	T	0	0	156		20	0	0.78		1	0	0	1	O	0.78
7AD7_A	A	N	1115	0	-&-	2346&2526	T	0	0	92		20	0	0.46		1	0	0	1	O	0.46
7AD7_A	A	G	1116	0	-&-	2346&2526	S	0	0	0		20	0	0		1	0	0	1	O	0
7AD7_A	A	S	1117	0	-&-	2346&2526	U	0	0	1		20	0	0.005		1	0	0	1	O	0.005
7AD7_A	A	F	1118	0	-&-	2346&2526	B	1	0	2		20	0	0.01		1	0	0	1	O	0.01
7AD7_A	A	K	1119	0	-&-	2346&2526	U	0	0	96		20	0	0.48		1	0	0	1	O	0.48
7AD7_A	A	E	1120	0	-&-	2346&2526	U	0	0	44		20	0	0.22		1	0	0	1	O	0.22
7AD7_A	A	N	1121	0	-&-	2346&2526	U	0	0	70		20	0	0.35		1	0	0	1	O	0.35
7AD7_A	A	S	1122	0	-&-	2346&2526	S	0	0	15		20	0	0.075		1	0	0	1	O	0.075
7AD7_A	A	Q	1123	0	-&-	2346&2526	S	0	0	108		20	0	0.54		1	0	0	1	O	0.54
7AD7_A	A	Y	1124	0	-&-	2346&2526	U	0	0	4		20	0	0.02		1	0	0	1	O	0.02
7AD7_A	A	Q	1125	0	-&-	2346&2526	U	0	0	78		20	0	0.39		1	0	0	1	O	0.39
7AD7_A	A	P	1126	0	-&-	2346&2526	U	0	0	9		20	0	0.045		1	0	0	1	O	0.045
7AD7_A	A	I	1127	0	-&-	2346&2526	U	0	0	8		20	0	0.04		1	0	0	1	O	0.04
7AD7_A	A	K	1128	0	-&-	2346&2526	U	0	0	3		20	0	0.015		1	0	0	1	O	0.015
7AD7_A	A	L	1129	0	-&-	2346&2526	U	0	0	3		20	0	0.015		1	0	0	1	O	0.015
7AD7_A	A	Q	1130	0	-&-	2346&2526	U	0	0	42		20	0	0.21		1	0	0	1	O	0.21
7AD7_A	A	G	1131	0	-&-	2346&2526	S	0	0	9		20	0	0.045		1	0	0	1	O	0.045
7AD7_A	A	T	1132	0	-&-	2346&2526	U	0	0	85		20	0	0.425		1	0	0	1	O	0.425
7AD7_A	A	L	1133	0	-&-	2346&2526	H	0	0	96		0	0	0.48		0	0	1	0	H	0.48
7AD7_A	A	P	1134	0	-&-	2346&2526	H	0	0	93		0	0	0.465		0	0	1	0	H	0.465
7AD7_A	A	V	1135	0	-&-	2346&2526	H	0	0	45		0	0	0.225		0	0	1	0	H	0.225
7AD7_A	A	E	1136	0	-&-	2346&2526	H	0	0	15		0	0	0.075		0	0	1	0	H	0.075
7AD7_A	A	A	1137	0	-&-	2346&2526	H	0	0	60		0	0	0.3		0	0	1	0	H	0.3
7AD7_A	A	R	1138	0	-&-	2346&2526	H	0	0	141		0	0	0.705		0	0	1	0	H	0.705
7AD7_A	A	E	1139	0	-&-	2346&2526	H	0	0	10		0	0	0.05		0	0	1	0	H	0.05
7AD7_A	A	N	1140	0	-&-	2346&2526	H	0	0	34		0	0	0.17		0	0	1	0	H	0.17
7AD7_A	A	S	1141	0	-&-	2346&2526	H	0	0	33		0	0	0.165		0	0	1	0	H	0.165
7AD7_A	A	L	1142	0	-&-	2346&2526	H	0	0	7		0	0	0.035		0	0	1	0	H	0.035
7AD7_A	A	Y	1143	0	-&-	2346&2526	H	0	0	3		0	0	0.015		0	0	1	0	H	0.015
7AD7_A	A	L	1144	0	-&-	2346&2526	H	0	0	16		0	0	0.08		0	0	1	0	H	0.08
7AD7_A	A	T	1145	0	-&-	2346&2526	H	0	0	0		0	0	0		0	0	1	0	H	0
7AD7_A	A	A	1146	0	-&-	2346&2526	H	0	0	0		0	0	0		0	0	1	0	H	0
7AD7_A	A	F	1147	0	-&-	2346&2526	H	0	0	7		0	0	0.035		0	0	1	0	H	0.035
7AD7_A	A	T	1148	0	-&-	2346&2526	H	0	0	0		0	0	0		0	0	1	0	H	0
7AD7_A	A	V	1149	0	-&-	2346&2526	H	0	0	0		0	0	0		0	0	1	0	H	0
7AD7_A	A	I	1150	0	-&-	2346&2526	H	0	0	4		0	0	0.02		0	0	1	0	H	0.02
7AD7_A	A	G	1151	0	-&-	2346&2526	H	0	0	1		0	0	0.005		0	0	1	0	H	0.005
7AD7_A	A	I	1152	0	-&-	2346&2526	H	0	0	1		0	0	0.005		0	0	1	0	H	0.005
7AD7_A	A	R	1153	0	-&-	2346&2526	H	0	0	54		0	0	0.27		0	0	1	0	H	0.27
7AD7_A	A	K	1154	0	-&-	2346&2526	H	0	0	43		0	0	0.215		0	0	1	0	H	0.215
7AD7_A	A	A	1155	0	-&-	2346&2526	H	0	0	0		0	0	0		0	0	1	0	H	0
7AD7_A	A	F	1156	0	-&-	2346&2526	H	0	0	30		0	0	0.15		0	0	1	0	H	0.15
7AD7_A	A	D	1157	0	-&-	2346&2526	T	0	0	144		5	0	0.72		0.25	0	0	1	O	0.72
7AD7_A	A	I	1158	0	-&-	2346&2526	T	0	0	19		5	0	0.095		0.25	0	0	1	O	0.095
7AD7_A	A	C	1159	0	-&-	2346&2526	S	0	0	2		5	0	0.01		0.25	0	0	1	O	0.01
7AD7_A	A	P	1160	0	-&-	2346&2526	U	0	0	80		5	0	0.4		0.25	0	0	1	O	0.4
7AD7_A	A	L	1161	0	-&-	2346&2526	U	0	0	69		5	0	0.345		0.25	0	0	1	O	0.345
7AD7_A	A	V	1162	0	-&-	2346&2526	H	0	0	113		0	0	0.565		0	0	1	0	H	0.565
7AD7_A	A	K	1163	0	-&-	2346&2526	H	0	0	112		0	0	0.56		0	0	1	0	H	0.56
7AD7_A	A	I	1164	0	-&-	2346&2526	H	0	0	0		0	0	0		0	0	1	0	H	0
7AD7_A	A	D	1165	0	-&-	2346&2526	H	0	0	62		0	0	0.31		0	0	1	0	H	0.31
7AD7_A	A	T	1166	0	-&-	2346&2526	H	0	0	71		0	0	0.355		0	0	1	0	H	0.355
7AD7_A	A	A	1167	0	-&-	2346&2526	H	0	0	7		0	0	0.035		0	0	1	0	H	0.035
7AD7_A	A	L	1168	0	-&-	2346&2526	H	0	0	1		0	0	0.005		0	0	1	0	H	0.005
7AD7_A	A	I	1169	0	-&-	2346&2526	H	0	0	82		0	0	0.41		0	0	1	0	H	0.41
7AD7_A	A	K	1170	0	-&-	2346&2526	H	0	0	74		0	0	0.37		0	0	1	0	H	0.37
7AD7_A	A	A	1171	0	-&-	2346&2526	H	0	0	0		0	0	0		0	0	1	0	H	0
7AD7_A	A	D	1172	0	-&-	2346&2526	H	0	0	13		0	0	0.065		0	0	1	0	H	0.065
7AD7_A	A	N	1173	0	-&-	2346&2526	H	0	0	68		0	0	0.34		0	0	1	0	H	0.34
7AD7_A	A	F	1174	0	-&-	2346&2526	H	0	0	10		0	0	0.05		0	0	1	0	H	0.05
7AD7_A	A	L	1175	0	-&-	2346&2526	H	0	0	0		0	0	0		0	0	1	0	H	0
7AD7_A	A	L	1176	0	-&-	2346&2526	H	0	0	12		0	0	0.06		0	0	1	0	H	0.06
7AD7_A	A	E	1177	0	-&-	2346&2526	H	0	0	142		0	0	0.71		0	0	1	0	H	0.71
7AD7_A	A	N	1178	0	-&-	2346&2526	H	0	0	34		0	0	0.17		0	0	1	0	H	0.17
7AD7_A	A	T	1179	0	-&-	2346&2526	S	0	0	2		6	0	0.01		0.3	0	0	1	O	0.01
7AD7_A	A	L	1180	0	-&-	2346&2526	S	0	0	46		6	0	0.23		0.3	0	0	1	O	0.23
7AD7_A	A	P	1181	0	-&-	2346&2526	S	0	0	125		6	0	0.625		0.3	0	0	1	O	0.625
7AD7_A	A	A	1182	0	-&-	2346&2526	U	0	0	23		6	0	0.115		0.3	0	0	1	O	0.115
7AD7_A	A	Q	1183	0	-&-	2346&2526	S	0	0	85		6	0	0.425		0.3	0	0	1	O	0.425
7AD7_A	A	S	1184	0	-&-	2346&2526	U	0	0	3		6	0	0.015		0.3	0	0	1	O	0.015
7AD7_A	A	T	1185	0	-&-	2346&2526	H	0	0	2		0	0	0.01		0	0	1	0	H	0.01
7AD7_A	A	F	1186	0	-&-	2346&2526	H	0	0	0		0	0	0		0	0	1	0	H	0
7AD7_A	A	T	1187	0	-&-	2346&2526	H	0	0	2		0	0	0.01		0	0	1	0	H	0.01
7AD7_A	A	L	1188	0	-&-	2346&2526	H	0	0	1		0	0	0.005		0	0	1	0	H	0.005
7AD7_A	A	A	1189	0	-&-	2346&2526	H	0	0	0		0	0	0		0	0	1	0	H	0
7AD7_A	A	I	1190	0	-&-	2346&2526	H	0	0	0		0	0	0		0	0	1	0	H	0
7AD7_A	A	S	1191	0	-&-	2346&2526	H	0	0	0		0	0	0		0	0	1	0	H	0
7AD7_A	A	A	1192	0	-&-	2346&2526	H	0	0	0		0	0	0		0	0	1	0	H	0
7AD7_A	A	Y	1193	0	-&-	2346&2526	H	0	0	3		0	0	0.015		0	0	1	0	H	0.015
7AD7_A	A	A	1194	0	-&-	2346&2526	H	0	0	0		0	0	0		0	0	1	0	H	0
7AD7_A	A	L	1195	0	-&-	2346&2526	H	0	0	5		0	0	0.025		0	0	1	0	H	0.025
7AD7_A	A	S	1196	0	-&-	2346&2526	H	0	0	1		0	0	0.005		0	0	1	0	H	0.005
7AD7_A	A	L	1197	0	-&-	2346&2526	T	0	0	41		6	0	0.205		0.3	0	0	1	O	0.205
7AD7_A	A	G	1198	0	-&-	2346&2526	S	0	0	11		6	0	0.055		0.3	0	0	1	O	0.055
7AD7_A	A	D	1199	0	-&-	2346&2526	U	0	0	103		6	0	0.515		0.3	0	0	1	O	0.515
7AD7_A	A	K	1200	0	-&-	2346&2526	T	0	0	86		6	0	0.43		0.3	0	0	1	O	0.43
7AD7_A	A	T	1201	0	-&-	2346&2526	T	0	0	96		6	0	0.48		0.3	0	0	1	O	0.48
7AD7_A	A	H	1202	0	-&-	2346&2526	U	0	0	74		6	0	0.37		0.3	0	0	1	O	0.37
7AD7_A	A	P	1203	0	-&-	2346&2526	H	0	0	72		0	0	0.36		0	0	1	0	H	0.36
7AD7_A	A	Q	1204	0	-&-	2346&2526	H	0	0	65		0	0	0.325		0	0	1	0	H	0.325
7AD7_A	A	F	1205	0	-&-	2346&2526	H	0	0	3		0	0	0.015		0	0	1	0	H	0.015
7AD7_A	A	R	1206	0	-&-	2346&2526	H	0	0	147		0	0	0.735		0	0	1	0	H	0.735
7AD7_A	A	S	1207	0	-&-	2346&2526	H	0	0	52		0	0	0.26		0	0	1	0	H	0.26
7AD7_A	A	I	1208	0	-&-	2346&2526	H	0	0	0		0	0	0		0	0	1	0	H	0
7AD7_A	A	V	1209	0	-&-	2346&2526	H	0	0	16		0	0	0.08		0	0	1	0	H	0.08
7AD7_A	A	S	1210	0	-&-	2346&2526	H	0	0	55		0	0	0.275		0	0	1	0	H	0.275
7AD7_A	A	A	1211	0	-&-	2346&2526	H	0	0	16		0	0	0.08		0	0	1	0	H	0.08
7AD7_A	A	L	1212	0	-&-	2346&2526	H	0	0	4		0	0	0.02		0	0	1	0	H	0.02
7AD7_A	A	K	1213	0	-&-	2346&2526	H	0	0	77		0	0	0.385		0	0	1	0	H	0.385
7AD7_A	A	R	1214	0	-&-	2346&2526	H	0	0	178		0	0	0.89		0	0	1	0	H	0.89
7AD7_A	A	E	1215	0	-&-	2346&2526	T	0	0	34		2	0	0.17		0.1	0	0	1	O	0.17
7AD7_A	A	A	1216	0	-&-	2346&2526	U	0	0	20		2	0	0.1		0.1	0	0	1	O	0.1
7AD7_A	A	L	1217	0	-&-	2346&2526	E	1	0	7		0	0	0.035		0	1	0	0	B	0.035
7AD7_A	A	V	1218	0	-&-	2346&2526	E	1	0	61		0	0	0.305		0	1	0	0	B	0.305
7AD7_A	A	K	1219	0	-&-	2346&2526	E	1	0	59		0	0	0.295		0	1	0	0	B	0.295
7AD7_A	A	G	1220	0	-&-	2346&2526	T	0	0	45		5	0	0.225		0.25	0	0	1	O	0.225
7AD7_A	A	N	1221	0	-&-	2346&2526	T	0	0	166		5	0	0.83		0.25	0	0	1	O	0.83
7AD7_A	A	P	1222	0	-&-	2346&2526	T	0	0	100		5	0	0.5		0.25	0	0	1	O	0.5
7AD7_A	A	P	1223	0	-&-	2346&2526	T	0	0	46		5	0	0.23		0.25	0	0	1	O	0.23
7AD7_A	A	I	1224	0	-&-	2346&2526	S	0	0	32		5	0	0.16		0.25	0	0	1	O	0.16
7AD7_A	A	Y	1225	0	-&-	2346&2526	E	1	0	52		0	0	0.26		0	1	0	0	B	0.26
7AD7_A	A	R	1226	0	-&-	2346&2526	E	1	0	35		0	0	0.175		0	1	0	0	B	0.175
7AD7_A	A	F	1227	0	-&-	2346&2526	E	1	0	0		0	0	0		0	1	0	0	B	0
7AD7_A	A	W	1228	0	-&-	2346&2526	U	0	0	1		17	0	0.005		0.85	0	0	1	O	0.005
7AD7_A	A	K	1229	0	-&-	2346&2526	U	0	0	20		17	0	0.1		0.85	0	0	1	O	0.1
7AD7_A	A	D	1230	0	-&-	2346&2526	S	0	0	30		17	0	0.15		0.85	0	0	1	O	0.15
7AD7_A	A	N	1231	0	-&-	2346&2526	S	0	0	28		17	0	0.14		0.85	0	0	1	O	0.14
7AD7_A	A	L	1232	0	-&-	2346&2526	U	0	0	6		17	0	0.03		0.85	0	0	1	O	0.03
7AD7_A	A	Q	1233	0	-&-	2346&2526	T	0	0	62		17	0	0.31		0.85	0	0	1	O	0.31
7AD7_A	A	H	1234	0	-&-	2346&2526	T	0	0	147		17	0	0.735		0.85	0	0	1	O	0.735
7AD7_A	A	K	1235	0	-&-	2346&2526	T	0	0	70		17	0	0.35		0.85	0	0	1	O	0.35
7AD7_A	A	D	1236	0	-&-	2346&2526	U	0	0	87		17	0	0.435		0.85	0	0	1	O	0.435
7AD7_A	A	S	1237	0	-&-	2346&2526	U	0	0	95		17	0	0.475		0.85	0	0	1	O	0.475
7AD7_A	A	S	1238	0	-&-	2346&2526	U	0	0	62		17	0	0.31		0.85	0	0	1	O	0.31
7AD7_A	A	V	1239	0	-&-	2346&2526	U	0	0	64		17	0	0.32		0.85	0	0	1	O	0.32
7AD7_A	A	P	1240	0	-&-	2346&2526	U	0	0	38		17	0	0.19		0.85	0	0	1	O	0.19
7AD7_A	A	N	1241	0	-&-	2346&2526	S	0	0	135		17	0	0.675		0.85	0	0	1	O	0.675
7AD7_A	A	T	1242	0	-&-	2346&2526	S	0	0	114		17	0	0.57		0.85	0	0	1	O	0.57
7AD7_A	A	G	1243	0	-&-	2346&2526	U	0	0	8		17	0	0.04		0.85	0	0	1	O	0.04
7AD7_A	A	T	1244	0	-&-	2346&2526	U	0	0	28		17	0	0.14		0.85	0	0	1	O	0.14
7AD7_A	A	A	1245	0	-&-	2346&2526	H	0	0	1		0	0	0.005		0	0	1	0	H	0.005
7AD7_A	A	R	1246	0	-&-	2346&2526	H	0	0	12		0	0	0.06		0	0	1	0	H	0.06
7AD7_A	A	M	1247	0	-&-	2346&2526	H	0	0	7		0	0	0.035		0	0	1	0	H	0.035
7AD7_A	A	V	1248	0	-&-	2346&2526	H	0	0	0		0	0	0		0	0	1	0	H	0
7AD7_A	A	E	1249	0	-&-	2346&2526	H	0	0	6		0	0	0.03		0	0	1	0	H	0.03
7AD7_A	A	T	1250	0	-&-	2346&2526	H	0	0	0		0	0	0		0	0	1	0	H	0
7AD7_A	A	T	1251	0	-&-	2346&2526	H	0	0	0		0	0	0		0	0	1	0	H	0
7AD7_A	A	A	1252	0	-&-	2346&2526	H	0	0	0		0	0	0		0	0	1	0	H	0
7AD7_A	A	Y	1253	0	-&-	2346&2526	H	0	0	0		0	0	0		0	0	1	0	H	0
7AD7_A	A	A	1254	0	-&-	2346&2526	H	0	0	0		0	0	0		0	0	1	0	H	0
[truncated: 851,669+ more rows]

## Sheet: TestingSet (MEROPS,PDB)
structure	chain	AA	num_AA	is_cut	MEROPS_CODE	SUBSTRATE_name	init_SS_type	bp1	bp2	ACC	bfac	len_loop	is_terminus	ACC_N_chain	bfac_N_chain	len_loop_N_chain	SS_B	SS_H	SS_O	SS_type	LinearDA_Scikit	S01.269_PWM	M10.003_PWM	C14.003_PWM	GaussianNaiveBayes_Total_score	ProCleave_score
6ZXD_k	k	W	10	0	-	Q8N1G4	U	0	0	90.0	25.56	4	1	0.486	0.759	0.2	0	0	1	O	0.6979	-11.368000000000002			0.043
6ZXD_k	k	P	11	0	-	Q8N1G4	U	0	0	68.0	25.38	4	1	0.368	0.751	0.2	0	0	1	O	0.6565	-12.010000000000002			0.027
6ZXD_k	k	E	12	0	-	Q8N1G4	T	0	0	126.0	29.65	4	1	0.681	0.939	0.2	0	0	1	O	0.7823	2.749			0.9345
6ZXD_k	k	L	13	0	-	Q8N1G4	T	0	0	7.0	23.01	4	1	0.038	0.647	0.2	0	0	1	O	0.5138	-9.538			0.0799	0.001
6ZXD_k	k	E	14	0	-	Q8N1G4	H	0	0	101.0	27.84	0	1	0.546	0.859	0.0	0	1	0	H	0.7991	4.546			0.952	0.135
6ZXD_k	k	L	15	0	-	Q8N1G4	H	0	0	57.0	21.04	0	1	0.308	0.56	0.0	0	1	0	H	0.6856	-5.199000000000001			0.5052	0.001
6ZXD_k	k	A	16	0	-	Q8N1G4	H	0	0	3.0	20.94	0	1	0.016	0.556	0.0	0	1	0	H	0.5801	-5.714			0.3951	0.0
6ZXD_k	k	E	17	0	-	Q8N1G4	H	0	0	65.0	20.34	0	1	0.351	0.529	0.0	0	1	0	H	0.6948	3.701			0.9328	0.347
6ZXD_k	k	R	18	0	-	Q8N1G4	H	0	0	157.0	21.54	0	1	0.849	0.582	0.0	0	1	0	H	0.8371	-6.209			0.4796	0.01
6ZXD_k	k	E	19	0	-	Q8N1G4	T	0	0	95.0	22.19	4	1	0.514	0.611	0.2	0	0	1	O	0.6827	3.638			0.9305	0.601
6ZXD_k	k	R	20	0	-	Q8N1G4	T	0	0	149.0	22.59	4	1	0.805	0.628	0.2	0	0	1	O	0.7741	-5.05			0.5692	0.012
6ZXD_k	k	R	21	0	-	Q8N1G4	U	0	0	103.0	21.39	4	0	0.557	0.575	0.2	0	0	1	O	0.4496	-5.344			0.3688	0.048
6ZXD_k	k	R	22	0	-	Q8N1G4	S	0	0	81.0	15.46	4	0	0.438	0.314	0.2	0	0	1	O	0.3569	-7.558			0.1499	0.014
6ZXD_k	k	E	23	0	-	Q8N1G4	E	1	0	111.0	13.77	0	0	0.6	0.24	0.0	1	0	0	B	0.5326	3.5120000000000005			0.905	0.636
6ZXD_k	k	L	24	0	-	Q8N1G4	E	1	0	13.0	13.01	0	0	0.07	0.206	0.0	1	0	0	B	0.3277	-5.647			0.287	0.063
6ZXD_k	k	L	25	0	-	Q8N1G4	E	1	0	116.0	12.83	0	0	0.627	0.198	0.0	1	0	0	B	0.535	-5.714			0.3727	0.03
6ZXD_k	k	L	26	0	-	Q8N1G4	E	1	0	28.0	16.82	0	0	0.151	0.374	0.0	1	0	0	B	0.3863	-5.838			0.2936	0.016
6ZXD_k	k	T	27	0	-	Q8N1G4	U	0	0	108.0	17.66	4	0	0.584	0.411	0.2	0	0	1	O	0.4287	-6.964			0.2131	0.003
6ZXD_k	k	G	28	0	-	Q8N1G4	S	0	0	36.0	18.93	4	0	0.195	0.467	0.2	0	0	1	O	0.2999	-7.050000000000001			0.1678	0.003
6ZXD_k	k	P	29	0	-	Q8N1G4	T	0	0	111.0	25.69	4	0	0.6	0.765	0.2	0	0	1	O	0.5029	-8.84			0.1099	0.001
6ZXD_k	k	G	30	0	-	Q8N1G4	T	0	0	37.0	18.97	4	0	0.2	0.469	0.2	0	0	1	O	0.3019	-3.4490000000000003			0.4807	0.0
6ZXD_k	k	L	31	0	-	Q8N1G4	H	0	0	12.0	21.92	0	0	0.065	0.599	0.0	0	1	0	H	0.3601	-11.592			0.0191	0.001
6ZXD_k	k	E	32	0	-	Q8N1G4	H	0	0	86.0	22.24	0	0	0.465	0.613	0.0	0	1	0	H	0.5143	0.975			0.8454	0.003
6ZXD_k	k	E	33	0	-	Q8N1G4	H	0	0	37.0	18.17	0	0	0.2	0.433	0.0	0	1	0	H	0.379	4.598999999999999			0.8914	0.431
6ZXD_k	k	R	34	0	-	Q8N1G4	H	0	0	90.0	19.37	0	0	0.486	0.486	0.0	0	1	0	H	0.4979	-3.248			0.5959	0.333
6ZXD_k	k	V	35	0	-	Q8N1G4	H	0	0	3.0	19.61	0	0	0.016	0.497	0.0	0	1	0	H	0.3252	-5.268000000000001			0.3202	0.004
6ZXD_k	k	R	36	0	-	Q8N1G4	H	0	0	157.0	21.43	0	0	0.849	0.577	0.0	0	1	0	H	0.6515	-3.5349999999999997			0.6472	0.081
6ZXD_k	k	A	37	0	-	Q8N1G4	H	0	0	88.0	17.62	0	0	0.476	0.409	0.0	0	1	0	H	0.4791	-1.513			0.7185	0.028
6ZXD_k	k	A	38	0	-	Q8N1G4	T	0	0	38.0	20.84	16	0	0.205	0.551	0.8	0	0	1	O	0.5805	-2.122			0.7215	0.318
6ZXD_k	k	G	39	0	-	Q8N1G4	T	0	0	68.0	24.2	16	0	0.368	0.699	0.8	0	0	1	O	0.6665	-1.7570000000000003			0.7781	0.023
6ZXD_k	k	G	40	0	-	Q8N1G4	S	0	0	12.0	21.32	16	0	0.065	0.572	0.8	0	0	1	O	0.5309	-3.472			0.5925	0.029
6ZXD_k	k	Q	41	0	-	Q8N1G4	B	1	0	81.0	21.07	16	0	0.438	0.561	0.8	0	0	1	O	0.667	-7.409			0.2649	0.0
6ZXD_k	k	L	42	0	-	Q8N1G4	U	0	0	4.0	19.37	16	0	0.022	0.486	0.8	0	0	1	O	0.4976	-14.096000000000002			0.0051	0.001
6ZXD_k	k	P	43	0	-	Q8N1G4	U	0	0	11.0	18.95	16	0	0.059	0.468	0.8	0	0	1	O	0.5085	-13.21			0.0094	0.005
6ZXD_k	k	P	44	0	-	Q8N1G4	T	0	0	94.0	24.12	16	0	0.508	0.696	0.8	0	0	1	O	0.7125	-8.615			0.1783	0.014
6ZXD_k	k	R	45	0	-	Q8N1G4	T	0	0	151.0	18.05	16	0	0.816	0.428	0.8	0	0	1	O	0.7647	-6.379			0.4203	0.076
6ZXD_k	k	L	46	0	-	Q8N1G4	T	0	0	1.0	18.11	16	0	0.005	0.431	0.8	0	0	1	O	0.4804	-8.446000000000002			0.1264	0.002
6ZXD_k	k	F	47	0	-	Q8N1G4	T	0	0	16.0	20.48	16	0	0.086	0.535	0.8	0	0	1	O	0.5319	-4.715			0.4734	0.104
6ZXD_k	k	T	48	0	-	Q8N1G4	U	0	0	91.0	19.81	16	0	0.492	0.506	0.8	0	0	1	O	0.6761	-7.531999999999999			0.2572	0.005
6ZXD_k	k	L	49	0	-	Q8N1G4	U	0	0	11.0	18.19	16	0	0.059	0.434	0.8	0	0	1	O	0.5019	-11.641000000000002			0.0245	0.001
6ZXD_k	k	P	50	0	-	Q8N1G4	S	0	0	76.0	15.78	16	0	0.411	0.328	0.8	0	0	1	O	0.616	-7.12			0.2707	0.0
6ZXD_k	k	L	51	0	-	Q8N1G4	S	0	0	60.0	16.18	16	0	0.324	0.346	0.8	0	0	1	O	0.5869	-7.682			0.2099	0.008
6ZXD_k	k	L	52	0	-	Q8N1G4	U	0	0	1.0	13.37	16	0	0.005	0.222	0.8	0	0	1	O	0.4403	-8.294000000000002			0.126	0.001
6ZXD_k	k	H	53	0	-	Q8N1G4	S	0	0	47.0	12.53	16	0	0.254	0.185	0.8	0	0	1	O	0.5295	-7.291			0.2217	0.008
6ZXD_k	k	Y	54	0	-	Q8N1G4	E	1	1	59.0	12.91	0	0	0.319	0.202	0.0	1	0	0	B	0.417	-6.363			0.259	0.023
6ZXD_k	k	L	55	0	-	Q8N1G4	E	1	1	0.0	15.54	0	0	0.0	0.318	0.0	1	0	0	B	0.3228	-9.111			0.0693	0.004
6ZXD_k	k	E	56	0	-	Q8N1G4	E	1	1	37.0	18.26	0	0	0.2	0.437	0.0	1	0	0	B	0.4162	3.558			0.8832	0.539
6ZXD_k	k	V	57	0	-	Q8N1G4	E	1	1	3.0	17.27	0	0	0.016	0.394	0.0	1	0	0	B	0.3414	-5.953			0.2655	0.003
6ZXD_k	k	S	58	0	-	Q8N1G4	E	0	1	15.0	16.57	0	0	0.081	0.363	0.0	1	0	0	B	0.3589	-6.141			0.256	0.018
6ZXD_k	k	G	59	0	-	Q8N1G4	S	0	0	46.0	17.09	10	0	0.249	0.386	0.5	0	0	1	O	0.4304	-3.709			0.5199	0.039
6ZXD_k	k	C	60	0	-	Q8N1G4	U	0	0	7.0	21.03	10	0	0.038	0.559	0.5	0	0	1	O	0.3836	-8.569999999999999			0.1004	0.003
6ZXD_k	k	G	61	0	-	Q8N1G4	T	0	0	51.0	20.46	10	0	0.276	0.534	0.5	0	0	1	O	0.469	-3.2			0.5858	0.002
6ZXD_k	k	S	62	0	-	Q8N1G4	T	0	0	39.0	20.44	10	0	0.211	0.533	0.5	0	0	1	O	0.4438	-6.2330000000000005			0.2813	0.001
6ZXD_k	k	L	63	0	-	Q8N1G4	U	0	0	3.0	16.43	10	0	0.016	0.357	0.5	0	0	1	O	0.3397	-7.314999999999999			0.161	0.004
6ZXD_k	k	R	64	0	-	Q8N1G4	U	0	0	156.0	15.36	10	0	0.843	0.31	0.5	0	0	1	O	0.6418	-6.779999999999999			0.3153	0.182
6ZXD_k	k	A	65	0	-	Q8N1G4	B	1	0	18.0	14.34	10	0	0.097	0.265	0.5	0	0	1	O	0.3521	-8.193			0.1129	0.041
6ZXD_k	k	P	66	0	-	Q8N1G4	U	0	0	8.0	14.11	10	0	0.043	0.255	0.5	0	0	1	O	0.3315	-10.483			0.0342	0.022
6ZXD_k	k	G	67	0	-	Q8N1G4	U	0	0	2.0	15.87	10	0	0.011	0.332	0.5	0	0	1	O	0.3336	-7.272			0.1622	0.002
6ZXD_k	k	P	68	0	-	Q8N1G4	T	0	0	94.0	16.74	10	0	0.508	0.37	0.5	0	0	1	O	0.5273	-9.967			0.0658	0.002
6ZXD_k	k	G	69	0	-	Q8N1G4	H	0	0	16.0	15.95	0	0	0.086	0.336	0.0	0	1	0	H	0.3218	-1.539			0.6489	0.001
6ZXD_k	k	L	70	0	-	Q8N1G4	H	0	0	2.0	13.72	0	0	0.011	0.237	0.0	0	1	0	H	0.2812	-8.223999999999998			0.0984	0.003
6ZXD_k	k	A	71	0	-	Q8N1G4	H	0	0	22.0	15.35	0	0	0.119	0.309	0.0	0	1	0	H	0.3284	-3.6439999999999992			0.4754	0.017
6ZXD_k	k	Q	72	0	-	Q8N1G4	H	0	0	168.0	17.08	0	0	0.908	0.385	0.0	0	1	0	H	0.6385	-3.198			0.6687	0.366
6ZXD_k	k	G	73	0	-	Q8N1G4	H	0	0	22.0	14.08	0	0	0.119	0.253	0.0	0	1	0	H	0.319	-3.526			0.4818	0.02
6ZXD_k	k	L	74	0	-	Q8N1G4	U	0	0	1.0	13.75	5	0	0.005	0.239	0.25	0	0	1	O	0.2265	-12.388			0.0091	0.003
6ZXD_k	k	P	75	0	-	Q8N1G4	T	0	0	65.0	13.76	5	0	0.351	0.239	0.25	0	0	1	O	0.3339	-8.575000000000001			0.0917	0.0
6ZXD_k	k	Q	76	0	-	Q8N1G4	T	0	0	70.0	17.31	5	0	0.378	0.396	0.25	0	0	1	O	0.3711	-4.637			0.401	0.045
6ZXD_k	k	L	77	0	-	Q8N1G4	U	0	0	0.0	11.94	5	0	0.0	0.159	0.25	0	0	1	O	0.2146	-8.76			0.0679	0.003
6ZXD_k	k	H	78	0	-	Q8N1G4	S	0	0	59.0	10.56	5	0	0.319	0.098	0.25	0	0	1	O	0.2995	-6.427			0.2121	0.024
6ZXD_k	k	S	79	0	-	Q8N1G4	E	1	1	26.0	11.61	0	0	0.141	0.144	0.0	1	0	0	B	0.3416	-5.851			0.2745	0.004
6ZXD_k	k	L	80	0	-	Q8N1G4	E	1	1	3.0	12.73	0	0	0.016	0.194	0.0	1	0	0	B	0.3075	-6.111000000000001			0.2398	0.003
6ZXD_k	k	V	81	0	-	Q8N1G4	E	1	1	20.0	15.52	0	0	0.108	0.317	0.0	1	0	0	B	0.3603	-5.917			0.276	0.005
6ZXD_k	k	L	82	0	-	Q8N1G4	E	1	0	8.0	15.38	0	0	0.043	0.311	0.0	1	0	0	B	0.3364	-6.378			0.2283	0.003
6ZXD_k	k	R	83	0	-	Q8N1G4	E	1	0	86.0	14.87	0	0	0.465	0.288	0.0	1	0	0	B	0.4895	-3.734			0.5476	0.027
6ZXD_k	k	R	84	0	-	Q8N1G4	S	0	0	165.0	15.49	19	0	0.892	0.315	0.95	0	0	1	O	0.8149	-4.1			0.6797	0.071
6ZXD_k	k	N	85	0	-	Q8N1G4	S	0	0	9.0	14.45	19	0	0.049	0.27	0.95	0	0	1	O	0.5346	-6.889			0.2585	0.232
6ZXD_k	k	A	86	0	-	Q8N1G4	U	0	0	42.0	12.94	19	0	0.227	0.203	0.95	0	0	1	O	0.5898	-2.987			0.6625	0.239
6ZXD_k	k	L	87	0	-	Q8N1G4	U	0	0	10.0	13.39	19	0	0.054	0.223	0.95	0	0	1	O	0.5275	-8.605			0.1281	0.008
6ZXD_k	k	G	88	0	-	Q8N1G4	U	0	0	5.0	17.0	19	0	0.027	0.382	0.95	0	0	1	O	0.5476	-6.782			0.2736	0.001
6ZXD_k	k	P	89	0	-	Q8N1G4	S	0	0	59.0	16.49	19	0	0.319	0.359	0.95	0	0	1	O	0.6517	-9.042			0.1318	0.012
6ZXD_k	k	G	90	0	-	Q8N1G4	S	0	0	17.0	15.87	19	0	0.092	0.332	0.95	0	0	1	O	0.563	-3.4240000000000004			0.6129	0.002
6ZXD_k	k	L	91	0	-	Q8N1G4	U	0	0	3.0	16.63	19	0	0.016	0.366	0.95	0	0	1	O	0.5403	-12.253			0.0183	0.0
6ZXD_k	k	S	92	0	-	Q8N1G4	S	0	0	83.0	14.03	19	0	0.449	0.251	0.95	0	0	1	O	0.6781	-11.449000000000002			0.0394	0.0
6ZXD_k	k	P	93	0	-	Q8N1G4	S	0	0	24.0	15.28	19	0	0.13	0.306	0.95	0	0	1	O	0.5725	-10.786			0.0462	0.035
6ZXD_k	k	E	94	0	-	Q8N1G4	U	0	0	62.0	18.36	19	0	0.335	0.442	0.95	0	0	1	O	0.6716	3.2790000000000004			0.9248	0.955
6ZXD_k	k	L	95	0	-	Q8N1G4	U	0	0	6.0	17.1	19	0	0.032	0.386	0.95	0	0	1	O	0.5503	-10.088			0.0645	0.0
6ZXD_k	k	G	96	0	-	Q8N1G4	U	0	0	4.0	14.94	19	0	0.022	0.291	0.95	0	0	1	O	0.5282	-7.022			0.2442	0.015
6ZXD_k	k	P	97	0	-	Q8N1G4	U	0	0	70.0	13.01	19	0	0.378	0.206	0.95	0	0	1	O	0.6456	-10.709			0.0559	0.0
6ZXD_k	k	L	98	0	-	Q8N1G4	U	0	0	3.0	11.49	19	0	0.016	0.139	0.95	0	0	1	O	0.4965	-11.918			0.0205	0.0
6ZXD_k	k	P	99	0	-	Q8N1G4	T	0	0	82.0	11.05	19	0	0.443	0.12	0.95	0	0	1	O	0.6535	-8.525			0.1667	0.013
6ZXD_k	k	A	100	0	-	Q8N1G4	T	0	0	29.0	10.29	19	0	0.157	0.086	0.95	0	0	1	O	0.5409	-2.9130000000000003			0.6452	0.012
6ZXD_k	k	L	101	0	-	Q8N1G4	U	0	0	4.0	10.18	19	0	0.022	0.081	0.95	0	0	1	O	0.4876	-8.249			0.1398	0.003
6ZXD_k	k	R	102	0	-	Q8N1G4	U	0	0	124.0	10.6	19	0	0.67	0.1	0.95	0	0	1	O	0.7254	-3.4719999999999995			0.6881	0.003
6ZXD_k	k	V	103	0	-	Q8N1G4	E	1	1	47.0	9.95	0	0	0.254	0.071	0.0	1	0	0	B	0.3688	-6.036999999999999			0.2688	0.004
6ZXD_k	k	L	104	0	-	Q8N1G4	E	1	1	2.0	12.31	0	0	0.011	0.175	0.0	1	0	0	B	0.3027	-7.641			0.1322	0.055
6ZXD_k	k	D	105	0	-	Q8N1G4	E	1	1	19.0	14.15	0	0	0.103	0.256	0.0	1	0	0	B	0.3478	0.5999999999999999			0.7808	0.372
6ZXD_k	k	L	106	0	-	Q8N1G4	U	0	0	1.0	14.3	20	0	0.005	0.263	1.0	0	0	1	O	0.5389	-5.971			0.3485	0.002
6ZXD_k	k	S	107	0	-	Q8N1G4	U	0	0	8.0	12.79	20	0	0.043	0.196	1.0	0	0	1	O	0.5407	-4.789			0.4705	0.0
6ZXD_k	k	G	108	0	-	Q8N1G4	S	0	0	33.0	12.03	20	0	0.178	0.163	1.0	0	0	1	O	0.5859	-2.069			0.7273	0.0
6ZXD_k	k	N	109	0	-	Q8N1G4	S	0	0	10.0	12.65	20	0	0.054	0.19	1.0	0	0	1	O	0.5438	-8.329999999999998			0.1491	0.003
6ZXD_k	k	A	110	0	-	Q8N1G4	U	0	0	38.0	13.2	20	0	0.205	0.215	1.0	0	0	1	O	0.6057	-3.331			0.642	0.002
6ZXD_k	k	L	111	0	-	Q8N1G4	U	0	0	0.0	15.88	20	0	0.0	0.333	1.0	0	0	1	O	0.5504	-8.399000000000001			0.1463	0.003
6ZXD_k	k	E	112	0	-	Q8N1G4	U	0	0	28.0	17.43	20	0	0.151	0.401	1.0	0	0	1	O	0.6199	4.6370000000000005			0.9313	0.745
6ZXD_k	k	A	113	0	-	Q8N1G4	U	0	0	27.0	17.54	20	0	0.146	0.406	1.0	0	0	1	O	0.619	-4.848			0.5058	0.013
6ZXD_k	k	L	114	0	-	Q8N1G4	U	0	0	4.0	17.89	20	0	0.022	0.421	1.0	0	0	1	O	0.5755	-13.718000000000002			0.0077	0.004
6ZXD_k	k	P	115	0	-	Q8N1G4	U	0	0	41.0	17.0	20	0	0.222	0.382	1.0	0	0	1	O	0.6422	-11.987			0.0266	0.001
6ZXD_k	k	P	116	0	-	Q8N1G4	T	0	0	113.0	17.08	20	0	0.611	0.385	1.0	0	0	1	O	0.7669	-7.870999999999999			0.2634	0.017
6ZXD_k	k	G	117	0	-	Q8N1G4	T	0	0	42.0	21.62	20	0	0.227	0.585	1.0	0	0	1	O	0.6791	-4.512			0.5717	0.044
6ZXD_k	k	Q	118	0	-	Q8N1G4	S	0	0	81.0	17.41	20	0	0.438	0.4	1.0	0	0	1	O	0.7179	-5.759			0.4629	0.131
6ZXD_k	k	G	119	0	-	Q8N1G4	S	0	0	1.0	16.44	20	0	0.005	0.357	1.0	0	0	1	O	0.5569	-2.037			0.7171	0.09
6ZXD_k	k	L	120	0	-	Q8N1G4	S	0	0	2.0	17.15	20	0	0.011	0.389	1.0	0	0	1	O	0.5653	-9.141			0.107	0.003
6ZXD_k	k	G	121	0	-	Q8N1G4	U	0	0	4.0	17.03	20	0	0.022	0.383	1.0	0	0	1	O	0.5683	-7.457000000000001			0.2219	0.0
6ZXD_k	k	P	122	0	-	Q8N1G4	U	0	0	28.0	19.45	20	0	0.151	0.49	1.0	0	0	1	O	0.636	-8.814			0.1421	0.039
6ZXD_k	k	A	123	0	-	Q8N1G4	T	0	0	16.0	19.59	20	0	0.086	0.496	1.0	0	0	1	O	0.6134	-9.059			0.1217	0.001
6ZXD_k	k	E	124	0	-	Q8N1G4	T	0	0	175.0	20.36	20	0	0.946	0.53	1.0	0	0	1	O	0.861	-5.509			0.5697	0.444
6ZXD_k	k	P	125	0	-	Q8N1G4	T	0	0	81.0	18.57	20	0	0.438	0.451	1.0	0	0	1	O	0.7258	-12.327000000000002			0.0258	0.005
6ZXD_k	k	P	126	0	-	Q8N1G4	T	0	0	77.0	16.78	20	0	0.416	0.372	1.0	0	0	1	O	0.7065	-8.052			0.2223	0.111
6ZXD_k	k	G	127	0	-	Q8N1G4	S	0	0	1.0	16.15	20	0	0.005	0.344	1.0	0	0	1	O	0.5544	-5.906000000000001			0.3625	0.003
6ZXD_k	k	L	128	0	-	Q8N1G4	S	0	0	3.0	14.27	20	0	0.016	0.262	1.0	0	0	1	O	0.5429	-14.249			0.005	0.002
6ZXD_k	k	P	129	0	-	Q8N1G4	S	0	0	34.0	14.37	20	0	0.184	0.266	1.0	0	0	1	O	0.6073	-8.160000000000002			0.1793	0.014
6ZXD_k	k	Q	130	0	-	Q8N1G4	S	0	0	88.0	13.73	20	0	0.476	0.238	1.0	0	0	1	O	0.7043	-3.927000000000001			0.6395	0.124
6ZXD_k	k	L	131	0	-	Q8N1G4	U	0	0	0.0	12.09	20	0	0.0	0.166	1.0	0	0	1	O	0.5183	-9.157			0.0972	0.003
6ZXD_k	k	Q	132	0	-	Q8N1G4	U	0	0	78.0	10.95	20	0	0.422	0.115	1.0	0	0	1	O	0.6657	-3.1859999999999995			0.6826	0.02
6ZXD_k	k	S	133	0	-	Q8N1G4	E	1	1	37.0	11.46	0	0	0.2	0.138	0.0	1	0	0	B	0.3614	-5.259			0.3367	0.001
6ZXD_k	k	L	134	0	-	Q8N1G4	E	1	1	0.0	12.85	0	0	0.0	0.199	0.0	1	0	0	B	0.3031	-7.121			0.1639	0.01
6ZXD_k	k	N	135	0	-	Q8N1G4	E	1	0	27.0	12.02	0	0	0.146	0.163	0.0	1	0	0	B	0.3466	-7.794			0.1333	0.019
6ZXD_k	k	L	136	0	-	Q8N1G4	U	0	0	0.0	12.89	12	0	0.0	0.201	0.6	0	0	1	O	0.348	-6.104			0.2551	0.005
6ZXD_k	k	S	137	0	-	Q8N1G4	U	0	0	21.0	11.63	12	0	0.114	0.145	0.6	0	0	1	O	0.3789	-5.097			0.3601	0.004
6ZXD_k	k	G	138	0	-	Q8N1G4	S	0	0	40.0	13.12	12	0	0.216	0.211	0.6	0	0	1	O	0.4293	-2.7920000000000003			0.6014	0.0
6ZXD_k	k	N	139	0	-	Q8N1G4	U	0	0	0.0	14.46	12	0	0.0	0.27	0.6	0	0	1	O	0.3601	-8.421999999999999			0.1032	0.005
6ZXD_k	k	R	140	0	-	Q8N1G4	U	0	0	122.0	15.91	12	0	0.659	0.334	0.6	0	0	1	O	0.622	-5.409999999999999			0.4487	0.005
6ZXD_k	k	L	141	0	-	Q8N1G4	U	0	0	0.0	18.21	12	0	0.0	0.435	0.6	0	0	1	O	0.39	-7.408			0.1685	0.002
6ZXD_k	k	R	142	0	-	Q8N1G4	S	0	0	113.0	22.76	12	0	0.611	0.636	0.6	0	0	1	O	0.6586	-7.202999999999999			0.281	0.032
6ZXD_k	k	E	143	0	-	Q8N1G4	S	0	0	89.0	25.45	12	0	0.481	0.754	0.6	0	0	1	O	0.6333	1.7339999999999998			0.8932	0.165
6ZXD_k	k	L	144	0	-	Q8N1G4	U	0	0	12.0	23.67	12	0	0.065	0.676	0.6	0	0	1	O	0.4601	-10.521			0.0428	0.01
6ZXD_k	k	P	145	0	-	Q8N1G4	U	0	0	17.0	23.19	12	0	0.092	0.655	0.6	0	0	1	O	0.4665	-7.305			0.1991	0.012
6ZXD_k	k	A	146	0	-	Q8N1G4	T	0	0	43.0	22.46	12	0	0.232	0.622	0.6	0	0	1	O	0.5144	-3.2909999999999995			0.6003	0.0
6ZXD_k	k	D	147	0	-	Q8N1G4	T	0	0	23.0	24.61	12	0	0.124	0.717	0.6	0	0	1	O	0.4909	-0.5800000000000001			0.7757	0.3
6ZXD_k	k	L	148	0	-	Q8N1G4	H	0	0	1.0	21.06	0	0	0.005	0.561	0.0	0	1	0	H	0.3324	-6.426			0.2231	0.002
6ZXD_k	k	A	149	0	-	Q8N1G4	H	0	0	7.0	18.46	0	0	0.038	0.446	0.0	0	1	0	H	0.3241	-3.662			0.4716	0.0
6ZXD_k	k	R	150	0	-	Q8N1G4	H	0	0	91.0	19.04	0	0	0.492	0.472	0.0	0	1	0	H	0.4975	-5.406			0.3857	0.029
6ZXD_k	k	C	151	0	-	Q8N1G4	H	0	0	0.0	18.81	0	0	0.0	0.462	0.0	0	1	0	H	0.3139	-8.297999999999998			0.1007	0.032
6ZXD_k	k	A	152	0	-	Q8N1G4	U	0	0	1.0	12.98	5	0	0.005	0.205	0.25	0	0	1	O	0.2219	-9.521			0.0468	0.03
6ZXD_k	k	P	153	0	-	Q8N1G4	T	0	0	46.0	12.2	5	0	0.249	0.17	0.25	0	0	1	O	0.2885	-7.807			0.1201	0.062
6ZXD_k	k	R	154	0	-	Q8N1G4	T	0	0	121.0	12.07	5	0	0.654	0.165	0.25	0	0	1	O	0.4311	-4.898			0.4042	0.145
6ZXD_k	k	L	155	0	-	Q8N1G4	U	0	0	1.0	8.98	5	0	0.005	0.029	0.25	0	0	1	O	0.1993	-9.580000000000002			0.0436	0.005
6ZXD_k	k	Q	156	0	-	Q8N1G4	U	0	0	85.0	8.95	5	0	0.459	0.027	0.25	0	0	1	O	0.3347	-3.591			0.4835	0.051
6ZXD_k	k	S	157	0	-	Q8N1G4	E	1	1	28.0	9.48	0	0	0.151	0.051	0.0	1	0	0	B	0.329	-5.259			0.3227	0.001
6ZXD_k	k	L	158	0	-	Q8N1G4	E	1	1	3.0	9.6	0	0	0.016	0.056	0.0	1	0	0	B	0.2853	-6.523			0.2004	0.017
6ZXD_k	k	N	159	0	-	Q8N1G4	E	0	1	47.0	10.6	0	0	0.254	0.1	0.0	1	0	0	B	0.374	-7.306			0.171	0.014
6ZXD_k	k	L	160	0	-	Q8N1G4	U	0	0	1.0	12.32	20	0	0.005	0.176	1.0	0	0	1	O	0.5221	-5.707			0.3671	0.011
6ZXD_k	k	T	161	0	-	Q8N1G4	T	0	0	45.0	13.03	20	0	0.243	0.207	1.0	0	0	1	O	0.6182	-5.656999999999999			0.4206	0.001
6ZXD_k	k	G	162	0	-	Q8N1G4	T	0	0	34.0	14.99	20	0	0.184	0.293	1.0	0	0	1	O	0.6123	-3.2410000000000005			0.6527	0.0
6ZXD_k	k	N	163	0	-	Q8N1G4	U	0	0	2.0	16.6	20	0	0.011	0.364	1.0	0	0	1	O	0.5605	-9.02			0.1123	0.005
6ZXD_k	k	C	164	0	-	Q8N1G4	U	0	0	57.0	17.3	20	0	0.308	0.395	1.0	0	0	1	O	0.6744	-7.522999999999999			0.2573	0.002
6ZXD_k	k	L	165	0	-	Q8N1G4	U	0	0	0.0	16.68	20	0	0.0	0.368	1.0	0	0	1	O	0.5571	-8.709000000000001			0.1289	0.08
6ZXD_k	k	D	166	0	-	Q8N1G4	S	0	0	81.0	16.23	20	0	0.438	0.348	1.0	0	0	1	O	0.7097	-0.919			0.833	0.286
6ZXD_k	k	S	167	0	-	Q8N1G4	S	0	0	42.0	15.38	20	0	0.227	0.311	1.0	0	0	1	O	0.6313	-7.324000000000001			0.258	0.004
6ZXD_k	k	F	168	0	-	Q8N1G4	U	0	0	16.0	17.03	20	0	0.086	0.383	1.0	0	0	1	O	0.5925	-10.134			0.0685	0.0
6ZXD_k	k	P	169	0	-	Q8N1G4	U	0	0	27.0	16.64	20	0	0.146	0.366	1.0	0	0	1	O	0.6117	-8.780000000000001			0.138	0.005
6ZXD_k	k	A	170	0	-	Q8N1G4	T	0	0	57.0	17.06	20	0	0.308	0.385	1.0	0	0	1	O	0.6727	-6.069999999999999			0.405	0.0
6ZXD_k	k	E	171	0	-	Q8N1G4	T	0	0	99.0	19.7	20	0	0.535	0.501	1.0	0	0	1	O	0.7618	2.6			0.9298	0.267
6ZXD_k	k	L	172	0	-	Q8N1G4	S	0	0	6.0	18.43	20	0	0.032	0.445	1.0	0	0	1	O	0.5838	-5.935			0.374	0.024
6ZXD_k	k	F	173	0	-	Q8N1G4	S	0	0	8.0	20.04	20	0	0.043	0.516	1.0	0	0	1	O	0.6012	-6.943000000000001			0.2811	0.01
6ZXD_k	k	R	174	0	-	Q8N1G4	U	0	0	88.0	20.09	20	0	0.476	0.518	1.0	0	0	1	O	0.7473	-9.141			0.1508	0.025
6ZXD_k	k	P	175	0	-	Q8N1G4	T	0	0	87.0	19.1	20	0	0.47	0.474	1.0	0	0	1	O	0.739	-7.730999999999999			0.2649	0.003
6ZXD_k	k	G	176	0	-	Q8N1G4	T	0	0	59.0	13.11	20	0	0.319	0.211	1.0	0	0	1	O	0.6464	-2.18			0.7452	0.161
6ZXD_k	k	A	177	0	-	Q8N1G4	S	0	0	4.0	13.64	20	0	0.022	0.234	1.0	0	0	1	O	0.5399	-8.068000000000001			0.1656	0.003
6ZXD_k	k	L	178	0	-	Q8N1G4	S	0	0	1.0	11.27	20	0	0.005	0.13	1.0	0	0	1	O	0.5132	-11.912000000000004			0.0213	0.002
6ZXD_k	k	P	179	0	-	Q8N1G4	T	0	0	53.0	9.77	20	0	0.286	0.063	1.0	0	0	1	O	0.6077	-7.822999999999999			0.2056	0.002
6ZXD_k	k	L	180	0	-	Q8N1G4	T	0	0	59.0	8.99	20	0	0.319	0.029	1.0	0	0	1	O	0.6136	-7.245			0.258	0.005
6ZXD_k	k	L	181	0	-	Q8N1G4	U	0	0	2.0	9.16	20	0	0.011	0.037	1.0	0	0	1	O	0.4976	-8.756000000000002			0.1132	0.001
6ZXD_k	k	S	182	0	-	Q8N1G4	U	0	0	34.0	10.29	20	0	0.184	0.086	1.0	0	0	1	O	0.5737	-7.095000000000001			0.2556	0.001
6ZXD_k	k	E	183	0	-	Q8N1G4	E	1	1	68.0	10.14	0	0	0.368	0.08	0.0	1	0	0	B	0.4126	4.465			0.896	0.774
6ZXD_k	k	L	184	0	-	Q8N1G4	E	1	1	5.0	9.84	0	0	0.027	0.067	0.0	1	0	0	B	0.2905	-4.855			0.3434	0.002
6ZXD_k	k	A	185	0	-	Q8N1G4	E	1	1	7.0	10.55	0	0	0.038	0.098	0.0	1	0	0	B	0.299	-1.2719999999999994			0.6577	0.023
6ZXD_k	k	A	186	0	-	Q8N1G4	U	0	0	0.0	11.63	10	0	0.0	0.145	0.5	0	0	1	O	0.2987	-2.08			0.5976	0.006
6ZXD_k	k	A	187	0	-	Q8N1G4	U	0	0	5.0	12.1	10	0	0.027	0.166	0.5	0	0	1	O	0.311	-4.326			0.4025	0.006
6ZXD_k	k	D	188	0	-	Q8N1G4	S	0	0	71.0	14.06	10	0	0.384	0.252	0.5	0	0	1	O	0.4565	-1.003			0.7402	0.028
6ZXD_k	k	N	189	0	-	Q8N1G4	S	0	0	0.0	15.36	10	0	0.0	0.31	0.5	0	0	1	O	0.3261	-8.004000000000001			0.1175	0.01
6ZXD_k	k	C	190	0	-	Q8N1G4	U	0	0	63.0	19.06	10	0	0.341	0.473	0.5	0	0	1	O	0.4824	-6.787999999999999			0.2471	0.001
6ZXD_k	k	L	191	0	-	Q8N1G4	U	0	0	0.0	16.85	10	0	0.0	0.375	0.5	0	0	1	O	0.3372	-7.906000000000001			0.125	0.004
6ZXD_k	k	R	192	0	-	Q8N1G4	S	0	0	152.0	17.38	10	0	0.822	0.399	0.5	0	0	1	O	0.6501	-7.656			0.2354	0.004
6ZXD_k	k	E	193	0	-	Q8N1G4	U	0	0	78.0	18.74	10	0	0.422	0.459	0.5	0	0	1	O	0.5112	3.131			0.8951	0.943
6ZXD_k	k	L	194	0	-	Q8N1G4	U	0	0	14.0	14.75	10	0	0.076	0.283	0.5	0	0	1	O	0.3478	-8.746000000000002			0.0867	0.022
6ZXD_k	k	S	195	0	-	Q8N1G4	U	0	0	30.0	12.7	10	0	0.162	0.193	0.5	0	0	1	O	0.3625	-9.994000000000002			0.0473	0.002
6ZXD_k	k	P	196	0	-	Q8N1G4	G	0	0	80.0	12.78	0	0	0.432	0.196	0.0	0	1	0	H	0.4215	-8.697999999999999			0.1013	0.0
6ZXD_k	k	D	197	1	S01.269	Q8N1G4	G	0	0	71.0	15.68	0	0	0.384	0.324	0.0	0	1	0	H	0.4275	0.4270000000000001			0.7998	0.186
6ZXD_k	k	I	198	0	-	Q8N1G4	G	0	0	0.0	14.21	0	0	0.0	0.259	0.0	0	1	0	H	0.2812	-9.351			0.0569	0.001
6ZXD_k	k	A	199	0	-	Q8N1G4	G	0	0	27.0	13.79	0	0	0.146	0.241	0.0	0	1	0	H	0.3261	-2.695			0.5598	0.001
6ZXD_k	k	H	200	0	-	Q8N1G4	G	0	0	84.0	18.22	0	0	0.454	0.436	0.0	0	1	0	H	0.4758	-5.667			0.3492	0.479
6ZXD_k	k	L	201	0	-	Q8N1G4	U	0	0	1.0	16.08	5	0	0.005	0.341	0.25	0	0	1	O	0.2406	-7.059			0.1519	0.008
6ZXD_k	k	A	202	0	-	Q8N1G4	T	0	0	64.0	13.63	5	0	0.346	0.233	0.25	0	0	1	O	0.3311	-1.942			0.6233	0.041
6ZXD_k	k	S	203	0	-	Q8N1G4	T	0	0	31.0	12.54	5	0	0.168	0.185	0.25	0	0	1	O	0.2657	-4.36			0.3785	0.005
6ZXD_k	k	L	204	0	-	Q8N1G4	U	0	0	1.0	12.96	5	0	0.005	0.204	0.25	0	0	1	O	0.2218	-6.767			0.1655	0.0
6ZXD_k	k	K	205	0	-	Q8N1G4	U	0	0	80.0	14.38	5	0	0.432	0.267	0.25	0	0	1	O	0.3674	-6.228			0.2518	0.013
6ZXD_k	k	T	206	0	-	Q8N1G4	E	1	1	31.0	13.86	0	0	0.168	0.244	0.0	1	0	0	B	0.3689	-4.064			0.4554	0.019
6ZXD_k	k	L	207	0	-	Q8N1G4	E	1	0	3.0	13.08	0	0	0.016	0.209	0.0	1	0	0	B	0.31	-6.816000000000001			0.1867	0.004
6ZXD_k	k	D	208	0	-	Q8N1G4	E	1	0	39.0	11.35	0	0	0.211	0.133	0.0	1	0	0	B	0.3644	0.1659999999999999			0.7669	0.045
6ZXD_k	k	L	209	0	-	Q8N1G4	U	0	0	0.0	11.57	12	0	0.0	0.143	0.6	0	0	1	O	0.3378	-6.57			0.2136	0.0
6ZXD_k	k	S	210	0	-	Q8N1G4	U	0	0	20.0	11.72	12	0	0.108	0.149	0.6	0	0	1	O	0.3774	-4.642			0.4035	0.001
6ZXD_k	k	N	211	0	-	Q8N1G4	S	0	0	83.0	13.82	12	0	0.449	0.242	0.6	0	0	1	O	0.5252	-7.631			0.1931	0.007
6ZXD_k	k	N	212	0	-	Q8N1G4	S	0	0	6.0	15.47	12	0	0.032	0.315	0.6	0	0	1	O	0.3798	-8.809000000000001			0.0891	0.007
6ZXD_k	k	Q	213	0	-	Q8N1G4	U	0	0	76.0	15.4	12	0	0.411	0.311	0.6	0	0	1	O	0.5238	-4.389			0.502	0.023
6ZXD_k	k	L	214	0	-	Q8N1G4	U	0	0	0.0	14.89	12	0	0.0	0.289	0.6	0	0	1	O	0.3635	-6.590000000000001			0.2207	0.016
6ZXD_k	k	S	215	0	-	Q8N1G4	U	0	0	33.0	15.34	12	0	0.178	0.309	0.6	0	0	1	O	0.4334	-7.755			0.1572	0.001
6ZXD_k	k	E	216	0	-	Q8N1G4	U	0	0	86.0	13.84	12	0	0.465	0.243	0.6	0	0	1	O	0.5316	1.78			0.872	0.262
6ZXD_k	k	I	217	0	-	Q8N1G4	U	0	0	7.0	12.28	12	0	0.038	0.174	0.6	0	0	1	O	0.3567	-12.547			0.0106	0.001
6ZXD_k	k	P	218	0	-	Q8N1G4	U	0	0	15.0	14.45	12	0	0.081	0.27	0.6	0	0	1	O	0.3896	-8.031			0.1295	0.001
6ZXD_k	k	A	219	0	-	Q8N1G4	T	0	0	56.0	16.49	12	0	0.303	0.359	0.6	0	0	1	O	0.4912	-4.585			0.4656	0.001
6ZXD_k	k	E	220	0	M10.003	Q8N1G4	T	0	0	27.0	16.94	12	0	0.146	0.379	0.6	0	0	1	O	0.4344	3.178			0.8803	0.848
6ZXD_k	k	L	221	0	-	Q8N1G4	G	0	0	0.0	14.25	0	0	0.0	0.261	0.0	0	1	0	H	0.2815	-5.869			0.2503	0.004
6ZXD_k	k	A	222	0	-	Q8N1G4	G	0	0	9.0	16.08	0	0	0.049	0.341	0.0	0	1	0	H	0.3102	-4.669999999999999			0.3695	0.014
6ZXD_k	k	D	223	0	-	Q8N1G4	G	0	0	119.0	18.84	0	0	0.643	0.463	0.0	0	1	0	H	0.5542	-2.870000000000001			0.6549	0.214
6ZXD_k	k	C	224	0	-	Q8N1G4	U	0	0	6.0	18.27	18	0	0.032	0.438	0.9	0	0	1	O	0.5377	-11.178			0.0345	0.008
6ZXD_k	k	P	225	0	-	Q8N1G4	T	0	0	98.0	16.56	18	0	0.53	0.363	0.9	0	0	1	O	0.704	-7.192			0.3025	0.002
6ZXD_k	k	K	226	0	-	Q8N1G4	T	0	0	94.0	14.85	18	0	0.508	0.287	0.9	0	0	1	O	0.6843	-6.614999999999999			0.3528	0.034
6ZXD_k	k	L	227	0	-	Q8N1G4	U	0	0	12.0	15.73	18	0	0.065	0.326	0.9	0	0	1	O	0.5289	-7.094			0.2382	0.002
6ZXD_k	k	K	228	0	-	Q8N1G4	U	0	0	132.0	17.88	18	0	0.714	0.421	0.9	0	0	1	O	0.768	-7.727			0.278	0.001
6ZXD_k	k	E	229	0	-	Q8N1G4	B	1	0	117.0	19.42	18	0	0.632	0.489	0.9	0	0	1	O	0.7544	4.727			0.9484	0.248
6ZXD_k	k	I	230	0	-	Q8N1G4	U	0	0	15.0	12.91	18	0	0.081	0.202	0.9	0	0	1	O	0.5112	-5.985			0.3342	0.009
6ZXD_k	k	N	231	0	-	Q8N1G4	U	0	0	39.0	10.1	18	0	0.211	0.078	0.9	0	0	1	O	0.5376	-7.234			0.2295	0.002
6ZXD_k	k	F	232	0	-	Q8N1G4	U	0	0	1.0	10.44	18	0	0.005	0.093	0.9	0	0	1	O	0.4607	-3.7040000000000006			0.5357	0.001
6ZXD_k	k	R	233	0	-	Q8N1G4	U	0	0	114.0	10.72	18	0	0.616	0.105	0.9	0	0	1	O	0.6901	-3.968			0.6287	0.038
6ZXD_k	k	G	234	0	-	Q8N1G4	S	0	0	50.0	13.13	18	0	0.27	0.211	0.9	0	0	1	O	0.5854	-1.899			0.738	0.0
6ZXD_k	k	N	235	0	-	Q8N1G4	S	0	0	13.0	14.82	18	0	0.07	0.286	0.9	0	0	1	O	0.5231	-7.66			0.1902	0.002
6ZXD_k	k	K	236	0	-	Q8N1G4	U	0	0	134.0	14.85	18	0	0.724	0.287	0.9	0	0	1	O	0.7519	-6.553999999999999			0.3941	0.024
6ZXD_k	k	L	237	0	-	Q8N1G4	U	0	0	17.0	14.09	18	0	0.092	0.254	0.9	0	0	1	O	0.5255	-4.976			0.4435	0.008
6ZXD_k	k	R	238	0	-	Q8N1G4	S	0	0	152.0	13.3	18	0	0.822	0.219	0.9	0	0	1	O	0.77	-3.5330000000000004			0.7042	0.003
6ZXD_k	k	D	239	0	-	Q8N1G4	S	0	0	61.0	11.46	18	0	0.33	0.138	0.9	0	0	1	O	0.5943	-0.237			0.8254	0.008
6ZXD_k	k	K	240	0	-	Q8N1G4	S	0	0	127.0	10.54	18	0	0.686	0.097	0.9	0	0	1	O	0.7116	-6.993			0.3265	0.038
6ZXD_k	k	R	241	0	-	Q8N1G4	S	0	0	111.0	9.88	18	0	0.6	0.068	0.9	0	0	1	O	0.6785	-2.754			0.7205	0.047
6ZXD_k	k	L	242	0	-	Q8N1G4	H	0	0	4.0	20.58	0	0	0.022	0.54	0.0	0	1	0	H	0.3346	-7.926			0.1234	0.001
6ZXD_k	k	E	243	0	-	Q8N1G4	H	0	0	56.0	10.69	0	0	0.303	0.104	0.0	0	1	0	H	0.3571	4.55			0.8865	0.188
6ZXD_k	k	K	244	0	-	Q8N1G4	H	0	0	134.0	10.17	0	0	0.724	0.081	0.0	0	1	0	H	0.512	-5.352			0.3983	0.004
6ZXD_k	k	M	245	0	-	Q8N1G4	H	0	0	35.0	8.81	0	0	0.189	0.021	0.0	0	1	0	H	0.3038	-3.0330000000000004			0.5194	0.028
6ZXD_k	k	V	246	0	-	Q8N1G4	H	0	0	11.0	9.74	0	0	0.059	0.062	0.0	0	1	0	H	0.2691	-6.134			0.2247	0.005
6ZXD_k	k	S	247	0	-	Q8N1G4	H	0	0	61.0	10.29	0	0	0.33	0.086	0.0	0	1	0	H	0.3635	-5.605			0.3054	0.002
6ZXD_k	k	G	248	0	-	Q8N1G4	H	0	0	64.0	12.67	0	0	0.346	0.191	0.0	0	1	0	H	0.3884	-3.37			0.5304	0.02
6ZXD_k	k	C	249	0	-	Q8N1G4	S	0	0	79.0	12.34	2	0	0.427	0.177	0.1	0	0	1	O	0.2903	-8.338999999999999			0.0948	0.006
6ZXD_k	k	Q	250	0	-	Q8N1G4	U	0	0	115.0	14.87	2	0	0.622	0.288	0.1	0	0	1	O	0.3763	-5.376			0.3323	0.026
6ZXD_k	k	T	251	0	-	Q8N1G4	H	0	0	21.0	13.24	0	0	0.114	0.216	0.0	0	1	0	H	0.3111	-5.595000000000001			0.285	0.093
6ZXD_k	k	R	252	0	-	Q8N1G4	H	0	0	144.0	13.49	0	0	0.778	0.227	0.0	0	1	0	H	0.5609	-4.833			0.4765	0.016
6ZXD_k	k	S	253	0	-	Q8N1G4	H	0	0	36.0	11.15	0	0	0.195	0.124	0.0	0	1	0	H	0.3229	-5.056			0.3389	0.0
6ZXD_k	k	I	254	0	-	Q8N1G4	H	0	0	6.0	9.38	0	0	0.032	0.046	0.0	0	1	0	H	0.2585	-9.287			0.0565	0.011
6ZXD_k	k	L	255	0	-	Q8N1G4	H	0	0	13.0	9.73	0	0	0.07	0.062	0.0	0	1	0	H	0.2724	-9.915			0.0417	0.0
6ZXD_k	k	E	256	0	-	Q8N1G4	H	0	0	78.0	9.48	0	0	0.422	0.051	0.0	0	1	0	H	0.3907	4.516			0.8926	0.866
6ZXD_k	k	Y	257	0	-	Q8N1G4	H	0	0	3.0	10.02	0	0	0.016	0.074	0.0	0	1	0	H	0.2579	-4.843			0.3305	0.009
6ZXD_k	k	L	258	0	-	Q8N1G4	H	0	0	14.0	9.92	0	0	0.076	0.07	0.0	0	1	0	H	0.2755	-6.038000000000001			0.2345	0.038
6ZXD_k	k	R	259	0	-	Q8N1G4	H	0	0	120.0	9.7	0	0	0.649	0.06	0.0	0	1	0	H	0.4788	-3.843			0.5318	0.008
6ZXD_k	k	V	260	0	-	Q8N1G4	T	0	0	93.0	9.52	16	0	0.503	0.052	0.8	0	0	1	O	0.5991	-5.254999999999999			0.4529	0.007
6ZXD_k	k	G	261	0	-	Q8N1G4	T	0	0	65.0	9.85	16	0	0.351	0.067	0.8	0	0	1	O	0.5443	-2.2800000000000007			0.6949	0.028
6ZXD_k	k	G	262	0	-	Q8N1G4	U	0	0	24.0	11.99	16	0	0.13	0.161	0.8	0	0	1	O	0.4768	-2.091			0.6784	0.006
6ZXD_k	k	R	263	0	-	Q8N1G4	S	0	0	113.0	11.85	16	0	0.611	0.155	0.8	0	0	1	O	0.6568	-5.239999999999998			0.4853	0.027
6ZXD_k	k	G	264	0	-	Q8N1G4	U	0	0	52.0	15.32	16	0	0.281	0.308	0.8	0	0	1	O	0.5634	-2.3030000000000004			0.7017	0.003
6ZXD_k	k	G	265	0	-	Q8N1G4	U	0	0	133.0	16.57	16	0	0.719	0.363	0.8	0	0	1	O	0.7267	-2.931000000000001			0.7291	0.006
6ZXD_k	k	V	323	0	-	Q8N1G4	U	0	0	143.0	16.06	16	0	0.773	0.341	0.8	0	0	1	O	0.7397	-7.997000000000001			0.2402	0.0
6ZXD_k	k	R	324	0	-	Q8N1G4	U	0	0	64.0	19.19	16	0	0.346	0.478	0.8	0	0	1	O	0.6195	-5.4			0.4485	0.024
6ZXD_k	k	V	325	0	-	Q8N1G4	U	0	0	103.0	18.86	16	0	0.557	0.464	0.8	0	0	1	O	0.6909	-8.736			0.1627	0.006
6ZXD_k	k	S	326	0	-	Q8N1G4	U	0	0	59.0	17.58	16	0	0.319	0.407	0.8	0	0	1	O	0.5964	-11.085			0.041	0.009
6ZXD_k	k	P	327	0	-	Q8N1G4	S	0	0	107.0	20.89	16	0	0.578	0.553	0.8	0	0	1	O	0.7121	-10.580000000000002			0.0687	0.002
6ZXD_k	k	E	328	0	-	Q8N1G4	U	0	0	64.0	18.64	16	0	0.346	0.454	0.8	0	0	1	O	0.6151	-0.069			0.838	0.786
6ZXD_k	k	V	329	0	-	Q8N1G4	U	0	0	55.0	17.66	16	0	0.297	0.411	0.8	0	0	1	O	0.5889	-12.075			0.0226	0.002
6ZXD_k	k	P	334	0	-	Q8N1G4	U	0	0	105.0	15.36	16	0	0.568	0.31	0.8	0	0	1	O	0.6687	-8.152			0.2001	0.003
6ZXD_k	k	Y	335	0	-	Q8N1G4	U	0	0	65.0	17.93	16	0	0.351	0.423	0.8	0	0	1	O	0.6113	-4.515000000000001			0.5354	0.01
6ZXD_k	k	I	336	0	-	Q8N1G4	U	0	0	88.0	18.53	16	0	0.476	0.449	0.8	0	0	1	O	0.6608	-7.965000000000001			0.2128	0.058
6ZXD_k	k	V	337	0	-	Q8N1G4	E	1	0	44.0	17.67	0	0	0.238	0.411	0.0	1	0	0	B	0.4257	-5.565999999999999			0.3361	0.005
6ZXD_k	k	G	338	0	-	Q8N1G4	E	1	0	60.0	15.45	0	0	0.324	0.314	0.0	1	0	0	B	0.4401	-0.5420000000000001			0.7592	0.003
6ZXD_k	k	A	339	0	-	Q8N1G4	E	1	0	71.0	14.78	0	0	0.384	0.284	0.0	1	0	0	B	0.4574	-2.455			0.6422	0.004
6ZXD_k	k	V	340	0	-	Q8N1G4	E	1	0	86.0	15.54	0	0	0.465	0.318	0.0	1	0	0	B	0.4953	-6.014			0.3241	0.001
6ZXD_k	k	V	341	0	-	Q8N1G4	U	0	0	57.0	16.15	7	0	0.308	0.344	0.35	0	0	1	O	0.3789	-5.581			0.3142	0.009
6ZXD_k	k	R	342	0	-	Q8N1G4	S	0	0	113.0	18.39	7	0	0.611	0.443	0.35	0	0	1	O	0.5132	-2.989			0.6256	0.177
6ZXD_k	k	G	343	0	-	Q8N1G4	S	0	0	83.0	18.2	7	0	0.449	0.435	0.35	0	0	1	O	0.4489	-1.1370000000000002			0.7293	0.127
6ZXD_k	k	M	344	0	-	Q8N1G4	U	0	0	41.0	18.24	7	0	0.222	0.437	0.35	0	0	1	O	0.3645	-4.981			0.3646	0.088
6ZXD_k	k	D	345	0	-	Q8N1G4	U	0	0	89.0	15.27	7	0	0.481	0.306	0.35	0	0	1	O	0.4366	-0.5840000000000001			0.7557	0.327
6ZXD_k	k	L	346	0	-	Q8N1G4	U	0	0	58.0	14.9	7	0	0.314	0.289	0.35	0	0	1	O	0.3711	-9.054			0.0778	0.02
6ZXD_k	k	Q	347	0	-	Q8N1G4	U	0	0	83.0	15.34	7	0	0.449	0.309	0.35	0	0	1	O	0.425	-7.840000000000001			0.1495	0.003
6ZXD_k	k	P	348	0	-	Q8N1G4	H	0	0	31.0	16.72	0	0	0.168	0.37	0.0	0	1	0	H	0.3562	-7.44			0.1572	0.001
6ZXD_k	k	G	349	0	-	Q8N1G4	H	0	0	84.0	15.61	0	0	0.454	0.321	0.0	0	1	0	H	0.4537	-1.7490000000000003			0.6922	0.003
6ZXD_k	k	N	350	0	-	Q8N1G4	H	0	0	101.0	16.72	0	0	0.546	0.37	0.0	0	1	0	H	0.4987	-8.115			0.1511	0.002
6ZXD_k	k	A	351	0	-	Q8N1G4	H	0	0	38.0	19.18	0	0	0.205	0.478	0.0	0	1	0	H	0.3891	-2.487			0.6074	0.0
6ZXD_k	k	L	352	0	-	Q8N1G4	H	0	0	45.0	18.34	0	0	0.243	0.441	0.0	0	1	0	H	0.3964	-6.555999999999999			0.2349	0.018
6ZXD_k	k	K	353	0	-	Q8N1G4	H	0	0	84.0	17.65	0	0	0.454	0.411	0.0	0	1	0	H	0.471	-6.409			0.2763	0.004
6ZXD_k	k	R	354	0	-	Q8N1G4	H	0	0	59.0	19.61	0	0	0.319	0.497	0.0	0	1	0	H	0.4355	-3.3489999999999998			0.5558	0.068
6ZXD_k	k	F	355	0	-	Q8N1G4	H	0	0	62.0	19.81	0	0	0.335	0.506	0.0	0	1	0	H	0.4434	-4.628000000000001			0.4371	0.014
6ZXD_k	k	L	356	0	-	Q8N1G4	H	0	0	62.0	19.05	0	0	0.335	0.472	0.0	0	1	0	H	0.4369	-6.809			0.2285	0.033
6ZXD_k	k	T	357	0	-	Q8N1G4	H	0	0	60.0	18.5	0	0	0.324	0.448	0.0	0	1	0	H	0.4281	-5.025			0.3902	0.028
6ZXD_k	k	S	358	0	-	Q8N1G4	H	0	0	43.0	15.79	0	0	0.232	0.329	0.0	0	1	0	H	0.3718	-4.980999999999999			0.368	0.009
6ZXD_k	k	Q	359	0	-	Q8N1G4	H	0	0	72.0	15.15	0	0	0.389	0.3	0.0	0	1	0	H	0.4248	-3.511			0.5356	0.005
6ZXD_k	k	T	360	0	-	Q8N1G4	H	0	0	62.0	14.21	0	0	0.335	0.259	0.0	0	1	0	H	0.3969	-4.807			0.3967	0.015
6ZXD_k	k	K	361	0	-	Q8N1G4	H	0	0	66.0	15.01	0	0	0.357	0.294	0.0	0	1	0	H	0.4116	-6.992			0.2052	0.007
6ZXD_k	k	L	362	0	-	Q8N1G4	I	0	0	42.0	14.35	0	0	0.227	0.265	0.0	0	1	0	H	0.3586	-5.744			0.2908	0.002
6ZXD_k	k	H	363	0	-	Q8N1G4	I	0	0	35.0	16.2	0	0	0.189	0.347	0.0	0	1	0	H	0.3596	-8.691000000000003			0.0909	0.004
6ZXD_k	k	E	364	0	-	Q8N1G4	I	0	0	58.0	15.16	0	0	0.314	0.301	0.0	0	1	0	H	0.3968	1.954			0.8431	0.066
6ZXD_k	k	D	365	0	-	Q8N1G4	I	0	0	94.0	18.36	0	0	0.508	0.442	0.0	0	1	0	H	0.4979	-0.8190000000000002			0.7661	0.511
6ZXD_k	k	L	366	0	-	Q8N1G4	I	0	0	76.0	18.97	0	0	0.411	0.469	0.0	0	1	0	H	0.4655	-7.005			0.2225	0.056
6ZXD_k	k	C	367	0	-	Q8N1G4	T	0	0	13.0	17.95	9	0	0.07	0.424	0.45	0	0	1	O	0.3498	-7.892			0.1285	0.001
6ZXD_k	k	E	368	0	-	Q8N1G4	T	0	0	50.0	14.31	9	0	0.27	0.263	0.45	0	0	1	O	0.3932	3.2989999999999995			0.8736	0.528
6ZXD_k	k	K	369	0	-	Q8N1G4	T	0	0	42.0	14.56	9	0	0.227	0.274	0.45	0	0	1	O	0.3794	-6.054			0.2715	0.026
6ZXD_k	k	R	370	0	-	Q8N1G4	T	0	0	41.0	13.89	9	0	0.222	0.245	0.45	0	0	1	O	0.3723	-2.5629999999999997			0.5931	0.033
6ZXD_k	k	T	371	0	-	Q8N1G4	T	0	0	55.0	13.69	9	0	0.297	0.236	0.45	0	0	1	O	0.3982	-3.393			0.5332	0.033
6ZXD_k	k	A	372	0	-	Q8N1G4	S	0	0	59.0	16.33	9	0	0.319	0.352	0.45	0	0	1	O	0.4282	-2.9519999999999995			0.5873	0.002
6ZXD_k	k	A	373	0	-	Q8N1G4	U	0	0	31.0	18.38	9	0	0.168	0.443	0.45	0	0	1	O	0.3886	-2.1029999999999998			0.6375	0.007
6ZXD_k	k	T	374	0	-	Q8N1G4	U	0	0	31.0	19.19	9	0	0.168	0.478	0.45	0	0	1	O	0.3951	-3.839			0.4899	0.037
6ZXD_k	k	L	375	0	-	Q8N1G4	U	0	0	52.0	17.05	9	0	0.281	0.384	0.45	0	0	1	O	0.4199	-5.593			0.3309	0.001
6ZXD_k	k	A	376	0	-	Q8N1G4	E	1	0	65.0	13.23	0	0	0.351	0.216	0.0	1	0	0	B	0.4318	-3.592			0.5316	0.001
6ZXD_k	k	T	377	0	-	Q8N1G4	E	1	0	74.0	13.69	0	0	0.4	0.236	0.0	1	0	0	B	0.4544	-5.425			0.3631	0.0
6ZXD_k	k	H	378	0	-	Q8N1G4	E	1	0	32.0	17.86	0	0	0.173	0.42	0.0	1	0	0	B	0.4029	-8.697			0.098	0.032
6ZXD_k	k	E	379	0	-	Q8N1G4	U	0	0	27.0	19.12	12	0	0.146	0.475	0.6	0	0	1	O	0.4528	3.665			0.8923	0.794
6ZXD_k	k	L	380	0	-	Q8N1G4	T	0	0	57.0	24.23	12	0	0.308	0.7	0.6	0	0	1	O	0.5587	-5.235			0.434	0.001
6ZXD_k	k	R	381	0	-	Q8N1G4	T	0	0	77.0	20.19	12	0	0.416	0.522	0.6	0	0	1	O	0.5661	-2.521			0.6872	0.03
6ZXD_k	k	A	382	0	-	Q8N1G4	S	0	0	71.0	18.01	12	0	0.384	0.426	0.6	0	0	1	O	0.5355	-2.149			0.7003	0.003
6ZXD_k	k	V	383	0	-	Q8N1G4	U	0	0	52.0	22.41	12	0	0.281	0.62	0.6	0	0	1	O	0.533	-5.709999999999999			0.3721	0.037
6ZXD_k	k	K	384	0	-	Q8N1G4	U	0	0	83.0	21.16	12	0	0.449	0.565	0.6	0	0	1	O	0.5868	-8.639000000000001			0.1405	0.019
6ZXD_k	k	G	385	0	-	Q8N1G4	S	0	0	67.0	21.12	12	0	0.362	0.563	0.6	0	0	1	O	0.5533	-5.839			0.3689	0.001
6ZXD_k	k	P	386	0	-	Q8N1G4	S	0	0	88.0	21.21	12	0	0.476	0.567	0.6	0	0	1	O	0.5973	-8.655999999999999			0.1421	0.002
6ZXD_k	k	L	387	0	-	Q8N1G4	U	0	0	55.0	18.72	12	0	0.297	0.458	0.6	0	0	1	O	0.508	-7.681000000000001			0.1839	0.0
6ZXD_k	k	L	388	0	-	Q8N1G4	B	1	0	57.0	18.77	12	0	0.308	0.46	0.6	0	0	1	O	0.5126	-9.306			0.0894	0.001
6ZXD_k	k	Y	389	0	-	Q8N1G4	U	0	0	49.0	18.75	12	0	0.265	0.459	0.6	0	0	1	O	0.4957	-6.055000000000001			0.3203	0.02
6ZXD_k	k	C	390	0	-	Q8N1G4	U	0	0	29.0	19.05	12	0	0.157	0.472	0.6	0	0	1	O	0.4564	-6.046999999999999			0.3038	0.068
6ZXD_k	k	A	391	0	-	Q8N1G4	E	1	0	24.0	19.72	0	0	0.13	0.502	0.0	1	0	0	B	0.4021	-6.992999999999999			0.2021	0.011
6ZXD_k	k	R	392	0	-	Q8N1G4	E	1	0	50.0	18.26	0	0	0.27	0.437	0.0	1	0	0	B	0.4429	-12.011			0.0174	0.014
6ZXD_k	k	P	393	0	-	Q8N1G4	U	0	0	65.0	18.85	20	0	0.351	0.463	1.0	0	0	1	O	0.7001	-13.007			0.016	0.027
6ZXD_k	k	P	394	0	-	Q8N1G4	S	0	0	46.0	19.16	20	0	0.249	0.477	1.0	0	0	1	O	0.6682	-9.388000000000002			0.1156	0.048
6ZXD_k	k	Q	395	0	-	Q8N1G4	S	0	0	85.0	20.18	20	0	0.459	0.522	1.0	0	0	1	O	0.7429	-5.071			0.5499	0.003
6ZXD_k	k	D	396	0	-	Q8N1G4	S	0	0	89.0	21.4	20	0	0.481	0.576	1.0	0	0	1	O	0.7571	-0.4979999999999999			0.8622	0.193
6ZXD_k	k	L	397	0	-	Q8N1G4	U	0	0	43.0	23.48	20	0	0.232	0.667	1.0	0	0	1	O	0.6944	-5.668			0.46	0.001
6ZXD_k	k	K	398	0	-	Q8N1G4	U	0	0	63.0	18.3	20	0	0.341	0.439	1.0	0	0	1	O	0.6929	-5.392			0.4888	0.056
6ZXD_k	k	I	399	0	-	Q8N1G4	U	0	0	45.0	13.87	20	0	0.243	0.244	1.0	0	0	1	O	0.625	-8.922			0.1326	0.006
6ZXD_k	k	V	400	0	-	Q8N1G4	U	0	0	55.0	14.0	20	0	0.297	0.25	1.0	0	0	1	O	0.6455	-10.508			0.0623	0.002
6ZXD_k	k	P	401	0	-	Q8N1G4	S	0	0	49.0	16.95	20	0	0.265	0.38	1.0	0	0	1	O	0.657	-6.382			0.3637	0.008
6ZXD_k	k	L	402	0	-	Q8N1G4	S	0	0	77.0	21.67	20	0	0.416	0.588	1.0	0	0	1	O	0.7399	-4.976999999999999			0.5579	0.008
6ZXD_k	k	G	403	0	-	Q8N1G4	S	0	0	85.0	31.03	20	0	0.459	1.0	1.0	0	0	1	O	0.807	-3.763			0.7035	0.002
6ZXD_k	k	R	404	0	-	Q8N1G4	S	0	0	84.0	24.71	20	0	0.454	0.722	1.0	0	0	1	O	0.7699	-5.062			0.5657	0.003
6ZXD_k	k	K	405	0	-	Q8N1G4	U	0	0	93.0	15.41	20	0	0.503	0.312	1.0	0	0	1	O	0.7245	-7.984			0.2353	0.0
6ZXD_k	k	E	406	0	-	Q8N1G4	U	0	0	68.0	14.87	20	0	0.368	0.288	1.0	0	0	1	O	0.6767	5.747			0.9458	0.517
6ZXD_k	k	A	407	0	-	Q8N1G4	U	0	0	38.0	14.47	20	0	0.205	0.27	1.0	0	0	1	O	0.6158	-0.0310000000000001			0.8396	0.0
6ZXD_k	k	K	408	0	-	Q8N1G4	S	0	0	34.0	18.47	20	0	0.184	0.447	1.0	0	0	1	O	0.6402	-5.295			0.4706	0.083
6ZXD_k	k	A	409	0	-	Q8N1G4	S	0	0	91.0	17.21	20	0	0.492	0.391	1.0	0	0	1	O	0.7332	-2.346			0.7698	0.001
6ZXD_k	k	K	410	0	-	Q8N1G4	S	0	0	61.0	20.48	20	0	0.33	0.535	1.0	0	0	1	O	0.7049	-7.744			0.2493	0.014
6ZXD_k	k	E	411	0	-	Q8N1G4	S	0	0	53.0	22.64	20	0	0.286	0.63	1.0	0	0	1	O	0.706	5.334			0.9468	0.445
6ZXD_k	k	L	412	0	-	Q8N1G4	S	0	0	68.0	18.84	20	0	0.368	0.463	1.0	0	0	1	O	0.7056	-4.4510000000000005			0.5917	0.011
6ZXD_k	k	V	413	0	-	Q8N1G4	H	0	0	67.0	16.93	0	0	0.362	0.379	0.0	0	1	0	H	0.4295	-5.844			0.3113	0.002
6ZXD_k	k	R	414	0	-	Q8N1G4	H	0	0	69.0	18.57	0	0	0.373	0.451	0.0	0	1	0	H	0.4474	-4.226999999999999			0.4787	0.056
6ZXD_k	k	Q	415	0	-	Q8N1G4	H	0	0	52.0	20.43	0	0	0.281	0.533	0.0	0	1	0	H	0.4279	-2.867			0.5944	0.03
6ZXD_k	k	L	416	0	-	Q8N1G4	H	0	0	57.0	18.07	0	0	0.308	0.429	0.0	0	1	0	H	0.4185	-7.251			0.1879	0.022
6ZXD_k	k	Q	417	0	-	Q8N1G4	H	0	0	64.0	15.25	0	0	0.346	0.305	0.0	0	1	0	H	0.4095	-2.977			0.5759	0.003
6ZXD_k	k	L	418	0	-	Q8N1G4	H	0	0	78.0	14.74	0	0	0.422	0.282	0.0	0	1	0	H	0.434	-8.404000000000002			0.1186	0.0
6ZXD_k	k	E	419	0	-	Q8N1G4	H	0	0	28.0	15.18	0	0	0.151	0.302	0.0	0	1	0	H	0.3383	4.576			0.8831	0.542
6ZXD_k	k	A	420	0	-	Q8N1G4	U	0	0	40.0	11.99	15	0	0.216	0.161	0.75	0	0	1	O	0.4874	-4.034999999999999			0.5178	0.0
6ZXD_k	k	E	421	0	-	Q8N1G4	U	0	0	70.0	10.42	15	0	0.378	0.092	0.75	0	0	1	O	0.5369	4.92			0.9219	0.809
6ZXD_k	k	R	424	0	-	Q8N1G4	U	0	0	71.0	9.83	15	0	0.384	0.066	0.75	0	0	1	O	0.5342	-2.513			0.6733	0.051
6ZXD_k	k	K	425	0	-	Q8N1G4	T	0	0	148.0	9.98	15	0	0.8	0.073	0.75	0	0	1	O	0.6875	-5.401			0.4849	0.011
6ZXD_k	k	Q	426	0	-	Q8N1G4	T	0	0	147.0	9.98	15	0	0.795	0.073	0.75	0	0	1	O	0.6858	-1.945			0.7749	0.002
6ZXD_k	k	K	427	0	-	Q8N1G4	T	0	0	93.0	11.21	15	0	0.503	0.127	0.75	0	0	1	O	0.5912	-4.834			0.4924	0.014
6ZXD_k	k	K	428	0	-	Q8N1G4	T	0	0	185.0	8.33	15	0	1.0	0.0	0.75	0	0	1	O	0.7393	-6.083			0.4392	0.014
6ZXD_k	k	R	429	0	-	Q8N1G4	U	0	0	168.0	10.56	15	0	0.908	0.098	0.75	0	0	1	O	0.7262	-4.071999999999999			0.6377	0.157
6ZXD_k	k	Q	430	0	-	Q8N1G4	S	0	0	172.0	10.03	15	0	0.93	0.075	0.75	0	0	1	O	0.7294	-3.931			0.6518	0.044
6ZXD_k	k	S	431	0	-	Q8N1G4	S	0	0	86.0	14.23	15	0	0.465	0.26	0.75	0	0	1	O	0.6017	-5.627000000000001			0.4152	0.014
6ZXD_k	k	V	432	0	-	Q8N1G4	U	0	0	56.0	16.66	15	0	0.303	0.367	0.75	0	0	1	O	0.5607	-6.547			0.3015	0.007
6ZXD_k	k	S	433	0	-	Q8N1G4	U	0	0	75.0	18.89	15	0	0.405	0.465	0.75	0	0	1	O	0.6173	-5.510999999999999			0.4356	0.0
6ZXD_k	k	G	434	0	-	Q8N1G4	S	0	0	47.0	18.89	15	0	0.254	0.465	0.75	0	0	1	O	0.5606	-2.107			0.714	0.002
6ZXD_k	k	L	435	0	-	Q8N1G4	T	0	0	72.0	23.08	15	0	0.389	0.65	0.75	0	0	1	O	0.6448	-8.9			0.1389	0.005
6ZXD_k	k	H	436	0	-	Q8N1G4	T	0	0	31.0	21.88	15	0	0.168	0.597	0.75	0	0	1	O	0.5528	-7.493			0.2134	0.005
6ZXD_k	k	R	437	0	-	Q8N1G4	G	0	0	75.0	20.27	0	0	0.405	0.526	0.0	0	1	0	H	0.4742	-5.472			0.3678	0.115
6ZXD_k	k	Y	438	0	-	Q8N1G4	G	0	0	12.0	21.86	0	0	0.065	0.596	0.0	0	1	0	H	0.3596	-6.472			0.2288	0.061
6ZXD_k	k	L	439	0	-	Q8N1G4	G	0	0	65.0	23.58	0	0	0.351	0.672	0.0	0	1	0	H	0.4814	-6.6			0.2633	0.006
6ZXD_k	k	H	440	0	-	Q8N1G4	G	0	0	89.0	22.2	0	0	0.481	0.611	0.0	0	1	0	H	0.5201	-6.247			0.3126	0.006
6ZXD_k	k	L	441	0	-	Q8N1G4	U	0	0	65.0	14.79	5	0	0.351	0.285	0.25	0	0	1	O	0.3418	-7.388000000000001			0.1568	0.011
6ZXD_k	k	L	442	0	-	Q8N1G4	U	0	0	112.0	12.58	5	0	0.605	0.187	0.25	0	0	1	O	0.4166	-6.184			0.2747	0.004
6ZXD_k	k	N	445	0	-	Q8N1G4	U	0	0	146.0	16.03	5	0	0.789	0.339	0.25	0	0	1	O	0.5167	-10.439000000000002			0.0501	0.001
6ZXD_k	k	E	446	0	-	Q8N1G4	U	0	0	93.0	17.28	5	0	0.503	0.394	0.25	0	0	1	O	0.417	3.621			0.8844	0.622
6ZXD_k	k	N	447	0	-	Q8N1G4	U	0	0	62.0	21.21	5	0	0.335	0.567	0.25	0	0	1	O	0.3865	-10.577			0.036	0.002
6ZXD_k	k	Y	448	0	-	Q8N1G4	E	1	0	47.0	20.09	0	0	0.254	0.518	0.0	1	0	0	B	0.4522	-12.209			0.0157	0.002
6ZXD_k	k	P	449	0	-	Q8N1G4	E	1	0	59.0	16.61	0	0	0.319	0.365	0.0	1	0	0	B	0.4479	-9.040000000000004			0.0903	0.039
6ZXD_k	k	C	450	0	-	Q8N1G4	U	0	0	35.0	17.99	20	0	0.189	0.426	1.0	0	0	1	O	0.6382	-6.597			0.3322	0.005
6ZXD_k	k	L	451	0	-	Q8N1G4	U	0	0	24.0	18.83	20	0	0.13	0.463	1.0	0	0	1	O	0.6235	-8.193			0.1819	0.003
6ZXD_k	k	V	452	0	-	Q8N1G4	B	1	0	53.0	22.05	20	0	0.286	0.604	1.0	0	0	1	O	0.7018	-6.001			0.4279	0.001
6ZXD_k	k	D	453	0	-	Q8N1G4	U	0	0	32.0	21.18	20	0	0.173	0.566	1.0	0	0	1	O	0.6572	0.6599999999999999			0.8726	0.152
6ZXD_k	k	A	454	0	-	Q8N1G4	S	0	0	92.0	17.62	20	0	0.497	0.409	1.0	0	0	1	O	0.7374	-2.334			0.7721	0.026
6ZXD_k	k	D	455	0	-	Q8N1G4	S	0	0	104.0	20.33	20	0	0.562	0.529	1.0	0	0	1	O	0.7732	0.4359999999999999			0.893	0.333
6ZXD_k	k	G	456	0	-	Q8N1G4	S	0	0	73.0	18.77	20	0	0.395	0.46	1.0	0	0	1	O	0.7138	-2.1210000000000004			0.7755	0.021
6ZXD_k	k	D	457	0	-	Q8N1G4	U	0	0	46.0	16.84	20	0	0.249	0.375	1.0	0	0	1	O	0.6505	-0.932			0.8138	0.156
6ZXD_k	k	V	458	0	-	Q8N1G4	U	0	0	33.0	16.08	20	0	0.178	0.341	1.0	0	0	1	O	0.6189	-6.603999999999999			0.3224	0.013
6ZXD_k	k	I	459	0	-	Q8N1G4	U	0	0	43.0	18.33	20	0	0.232	0.441	1.0	0	0	1	O	0.6561	-7.908			0.2159	0.03
6ZXD_k	k	S	460	0	-	Q8N1G4	U	0	0	36.0	17.42	20	0	0.195	0.4	1.0	0	0	1	O	0.6357	-7.616			0.2334	0.028
6ZXD_k	k	F	461	0	-	Q8N1G4	U	0	0	46.0	18.61	20	0	0.249	0.453	1.0	0	0	1	O	0.6641	-11.949000000000002			0.0285	0.009
6ZXD_k	k	P	462	0	-	Q8N1G4	T	0	0	44.0	19.27	20	0	0.238	0.482	1.0	0	0	1	O	0.6653	-13.910000000000002			0.0082	0.001
6ZXD_k	k	P	463	0	-	Q8N1G4	T	0	0	62.0	17.2	20	0	0.335	0.391	1.0	0	0	1	O	0.6829	-7.568999999999999			0.2565	0.001
6ZXD_k	k	I	464	0	-	Q8N1G4	T	0	0	89.0	20.52	20	0	0.481	0.537	1.0	0	0	1	O	0.7515	-10.247			0.0887	0.0
6ZXD_k	k	T	465	0	-	Q8N1G4	U	0	0	56.0	20.99	20	0	0.303	0.558	1.0	0	0	1	O	0.6999	-7.781			0.2439	0.004
6ZXD_k	k	N	466	0	-	Q8N1G4	U	0	0	39.0	20.48	20	0	0.211	0.535	1.0	0	0	1	O	0.6651	-6.273000000000001			0.3793	0.013
6ZXD_k	k	S	467	0	-	Q8N1G4	U	0	0	15.0	20.06	20	0	0.081	0.517	1.0	0	0	1	O	0.6154	-7.281			0.2555	0.001
6ZXD_k	k	E	468	0	-	Q8N1G4	S	0	0	67.0	18.26	20	0	0.362	0.437	1.0	0	0	1	O	0.6995	4.255			0.9385	0.508
6ZXD_k	k	K	469	0	-	Q8N1G4	T	0	0	54.0	18.34	20	0	0.292	0.441	1.0	0	0	1	O	0.6768	-5.544			0.4638	0.007
6ZXD_k	k	T	470	0	-	Q8N1G4	T	0	0	20.0	18.15	20	0	0.108	0.433	1.0	0	0	1	O	0.61	-2.7			0.6939	0.002
6ZXD_k	k	K	471	0	-	Q8N1G4	U	0	0	54.0	18.76	20	0	0.292	0.459	1.0	0	0	1	O	0.6798	-3.859			0.6332	0.004
6ZXD_k	k	V	472	0	-	Q8N1G4	U	0	0	100.0	15.92	20	0	0.541	0.334	1.0	0	0	1	O	0.7394	-4.161999999999999			0.6364	0.0
6ZXD_k	k	K	473	0	-	Q8N1G4	U	0	0	54.0	17.24	20	0	0.292	0.393	1.0	0	0	1	O	0.6686	-5.400999999999999			0.4746	0.025
6ZXD_k	k	K	474	0	-	Q8N1G4	S	0	0	104.0	13.34	20	0	0.562	0.221	1.0	0	0	1	O	0.7287	-5.363			0.5115	0.029
6ZXD_k	k	T	475	0	-	Q8N1G4	U	0	0	75.0	17.02	20	0	0.405	0.383	1.0	0	0	1	O	0.7047	-3.842			0.6472	0.058
6ZXD_k	k	T	476	0	-	Q8N1G4	U	0	0	55.0	16.52	20	0	0.297	0.361	1.0	0	0	1	O	0.6649	-4.947			0.5202	0.041
6ZXD_k	k	S	477	0	-	Q8N1G4	U	0	0	66.0	16.12	20	0	0.357	0.343	1.0	0	0	1	O	0.6823	-6.131			0.4035	0.002
6ZXD_k	k	D	478	0	-	Q8N1G4	U	0	0	42.0	15.88	20	0	0.227	0.333	1.0	0	0	1	O	0.6352	-0.52			0.8265	0.025
6ZXD_k	k	L	479	0	-	Q8N1G4	U	0	0	33.0	19.5	20	0	0.178	0.492	1.0	0	0	1	O	0.646	-7.031000000000001			0.2922	0.004
6ZXD_k	k	F	480	0	-	Q8N1G4	E	1	1	36.0	19.25	0	0	0.195	0.481	0.0	1	0	0	B	0.4226	-4.252			0.4638	0.002
6ZXD_k	k	L	481	0	-	Q8N1G4	E	1	1	51.0	15.63	0	0	0.276	0.322	0.0	1	0	0	B	0.4233	-8.869000000000002			0.0937	0.001
6ZXD_k	k	E	482	0	-	Q8N1G4	E	1	1	53.0	15.78	0	0	0.286	0.328	0.0	1	0	0	B	0.4283	3.632000000000001			0.8869	0.756
6ZXD_k	k	V	483	0	-	Q8N1G4	E	1	0	25.0	18.37	0	0	0.135	0.442	0.0	1	0	0	B	0.3929	-6.309			0.2545	0.003
6ZXD_k	k	T	484	0	-	Q8N1G4	U	0	0	38.0	21.01	7	0	0.205	0.559	0.35	0	0	1	O	0.3804	-5.779			0.2965	0.027
6ZXD_k	k	S	485	0	-	Q8N1G4	U	0	0	96.0	19.53	7	0	0.519	0.493	0.35	0	0	1	O	0.4871	-4.373			0.4846	0.103
6ZXD_k	k	S	488	0	-	Q8N1G4	U	0	0	146.0	19.34	7	0	0.789	0.485	0.35	0	0	1	O	0.5894	-5.172000000000001			0.4565	0.024
6ZXD_k	k	L	489	0	-	Q8N1G4	U	0	0	98.0	18.87	7	0	0.53	0.464	0.35	0	0	1	O	0.4858	-8.712			0.1131	0.0
6ZXD_k	k	Q	490	0	-	Q8N1G4	S	0	0	63.0	15.57	7	0	0.341	0.319	0.35	0	0	1	O	0.3864	-3.4280000000000004			0.5241	0.005
6ZXD_k	k	I	491	0	-	Q8N1G4	T	0	0	73.0	15.51	7	1	0.395	0.316	0.35	0	0	1	O	0.6517	-7.893000000000002			0.2155	0.025
6ZXD_k	k	C	492	0	-	Q8N1G4	T	0	0	49.0	13.4	7	1	0.265	0.223	0.35	0	0	1	O	0.5873	-6.331999999999999			0.335	0.003
6ZXD_k	k	K	493	0	-	Q8N1G4	H	0	0	61.0	15.79	0	1	0.33	0.329	0.0	0	1	0	H	0.6537	-6.8500000000000005			0.3137	0.001
6ZXD_k	k	D	494	0	-	Q8N1G4	H	0	0	56.0	15.99	0	1	0.303	0.337	0.0	0	1	0	H	0.6456	1.302			0.8863	0.279
6ZXD_k	k	V	495	0	-	Q8N1G4	H	0	0	39.0	16.43	0	1	0.211	0.357	0.0	0	1	0	H	0.6159	-4.227			0.566	0.01
6ZXD_k	k	M	496	0	-	Q8N1G4	H	0	0	60.0	16.86	0	1	0.324	0.376	0.0	0	1	0	H	0.6598	-3.882			0.621	0.0
6ZXD_k	k	D	497	0	-	Q8N1G4	H	0	0	69.0	16.84	0	1	0.373	0.375	0.0	0	1	0	H	0.6765	1.5739999999999998			0.8986	0.77
6ZXD_k	k	A	498	0	-	Q8N1G4	H	0	0	58.0	18.08	0	1	0.314	0.43	0.0	0	1	0	H	0.6656	-2.507			0.7319	0.027
6ZXD_k	k	L	499	0	-	Q8N1G4	H	0	0	58.0	18.6	0	1	0.314	0.452	0.0	0	1	0	H	0.6694	-4.259			0.591	0.012
6ZXD_k	k	I	500	0	-	Q8N1G4	H	0	0	70.0	18.66	0	1	0.378	0.455	0.0	0	1	0	H	0.6915	-6.32			0.3879	0.0
6ZXD_k	k	L	501	0	-	Q8N1G4	S	0	0	75.0	16.15	6	1	0.405	0.344	0.3	0	0	1	O	0.6394	-5.3950000000000005			0.4596	0.002
6ZXD_k	k	K	502	0	-	Q8N1G4	T	0	0	54.0	15.31	6	1	0.292	0.307	0.3	0	0	1	O	0.5911	-4.486			0.5276	0.007
6ZXD_k	k	M	503	0	-	Q8N1G4	T	0	0	52.0	17.74	6	1	0.281	0.415	0.3	0	0	1	O	0.6071	-2.748			0.689
6ZXD_k	k	A	504	0	-	Q8N1G4	T	0	0	83.0	15.39	6	1	0.449	0.311	0.3	0	0	1	O	0.6492	-4.519			0.5551
6ZXD_k	k	E	505	0	-	Q8N1G4	U	0	0	109.0	15.02	6	1	0.589	0.295	0.3	0	0	1	O	0.6944	4.914			0.9429
6ZXD_k	k	W	10	0	-	Q8N1G4	U	0	0	90.0	25.56	4	1	0.486	0.759	0.2	0	0	1	O	0.6979		-7.436		0.2756
6ZXD_k	k	P	11	0	-	Q8N1G4	U	0	0	68.0	25.38	4	1	0.368	0.751	0.2	0	0	1	O	0.6565		-5.616000000000001		0.4452
6ZXD_k	k	E	12	0	-	Q8N1G4	T	0	0	126.0	29.65	4	1	0.681	0.939	0.2	0	0	1	O	0.7823		-3.302		0.7271
6ZXD_k	k	L	13	0	-	Q8N1G4	T	0	0	7.0	23.01	4	1	0.038	0.647	0.2	0	0	1	O	0.5138		-2.218		0.6858	0.005
6ZXD_k	k	E	14	0	-	Q8N1G4	H	0	0	101.0	27.84	0	1	0.546	0.859	0.0	0	1	0	H	0.7991		-1.932		0.8163	0.005
6ZXD_k	k	L	15	0	-	Q8N1G4	H	0	0	57.0	21.04	0	1	0.308	0.56	0.0	0	1	0	H	0.6856		-7.438000000000001		0.2701	0.0
6ZXD_k	k	A	16	0	-	Q8N1G4	H	0	0	3.0	20.94	0	1	0.016	0.556	0.0	0	1	0	H	0.5801		-6.832		0.2826	8.749
6ZXD_k	k	E	17	0	-	Q8N1G4	H	0	0	65.0	20.34	0	1	0.351	0.529	0.0	0	1	0	H	0.6948		-5.988		0.4255	0.001
6ZXD_k	k	R	18	0	-	Q8N1G4	H	0	0	157.0	21.54	0	1	0.849	0.582	0.0	0	1	0	H	0.8371		-7.459		0.3391	0.0
6ZXD_k	k	E	19	0	-	Q8N1G4	T	0	0	95.0	22.19	4	1	0.514	0.611	0.2	0	0	1	O	0.6827		-10.023		0.0867	0.0
6ZXD_k	k	R	20	0	-	Q8N1G4	T	0	0	149.0	22.59	4	1	0.805	0.628	0.2	0	0	1	O	0.7741		-9.81		0.1157	0.0
6ZXD_k	k	R	21	0	-	Q8N1G4	U	0	0	103.0	21.39	4	0	0.557	0.575	0.2	0	0	1	O	0.4496		-9.765		0.0629	0.0
6ZXD_k	k	R	22	0	-	Q8N1G4	S	0	0	81.0	15.46	4	0	0.438	0.314	0.2	0	0	1	O	0.3569		-7.936		0.1276	0.0
6ZXD_k	k	E	23	0	-	Q8N1G4	E	1	0	111.0	13.77	0	0	0.6	0.24	0.0	1	0	0	B	0.5326		-2.021		0.7078	0.083
6ZXD_k	k	L	24	0	-	Q8N1G4	E	1	0	13.0	13.01	0	0	0.07	0.206	0.0	1	0	0	B	0.3277		-2.934		0.5398	0.023
6ZXD_k	k	L	25	0	-	Q8N1G4	E	1	0	116.0	12.83	0	0	0.627	0.198	0.0	1	0	0	B	0.535		-1.5300000000000007		0.7403	0.082
6ZXD_k	k	L	26	0	-	Q8N1G4	E	1	0	28.0	16.82	0	0	0.151	0.374	0.0	1	0	0	B	0.3863		-8.109		0.1244	0.0
6ZXD_k	k	T	27	0	-	Q8N1G4	U	0	0	108.0	17.66	4	0	0.584	0.411	0.2	0	0	1	O	0.4287		-5.779		0.3171	0.004
6ZXD_k	k	G	28	0	-	Q8N1G4	S	0	0	36.0	18.93	4	0	0.195	0.467	0.2	0	0	1	O	0.2999		-6.970000000000001		0.1731	0.001
6ZXD_k	k	P	29	0	-	Q8N1G4	T	0	0	111.0	25.69	4	0	0.6	0.765	0.2	0	0	1	O	0.5029		-2.388		0.6684	0.003
6ZXD_k	k	G	30	0	-	Q8N1G4	T	0	0	37.0	18.97	4	0	0.2	0.469	0.2	0	0	1	O	0.3019		-0.969		0.6792	0.005
6ZXD_k	k	L	31	0	-	Q8N1G4	H	0	0	12.0	21.92	0	0	0.065	0.599	0.0	0	1	0	H	0.3601		-5.928000000000001		0.275	0.039
6ZXD_k	k	E	32	0	-	Q8N1G4	H	0	0	86.0	22.24	0	0	0.465	0.613	0.0	0	1	0	H	0.5143		-4.99		0.4364	0.0
6ZXD_k	k	E	33	0	-	Q8N1G4	H	0	0	37.0	18.17	0	0	0.2	0.433	0.0	0	1	0	H	0.379		-5.899		0.2851	0.0
6ZXD_k	k	R	34	0	-	Q8N1G4	H	0	0	90.0	19.37	0	0	0.486	0.486	0.0	0	1	0	H	0.4979		-3.2070000000000007		0.5995	0.012
6ZXD_k	k	V	35	0	-	Q8N1G4	H	0	0	3.0	19.61	0	0	0.016	0.497	0.0	0	1	0	H	0.3252		-7.329		0.1563	0.0
6ZXD_k	k	R	36	0	-	Q8N1G4	H	0	0	157.0	21.43	0	0	0.849	0.577	0.0	0	1	0	H	0.6515		-4.051		0.6013	0.033
6ZXD_k	k	A	37	0	-	Q8N1G4	H	0	0	88.0	17.62	0	0	0.476	0.409	0.0	0	1	0	H	0.4791		1.7579999999999996		0.8589	0.165
6ZXD_k	k	A	38	0	-	Q8N1G4	T	0	0	38.0	20.84	16	0	0.205	0.551	0.8	0	0	1	O	0.5805		-3.365		0.6267	0.003
6ZXD_k	k	G	39	0	-	Q8N1G4	T	0	0	68.0	24.2	16	0	0.368	0.699	0.8	0	0	1	O	0.6665		0.1859999999999999		0.8608	0.134
6ZXD_k	k	G	40	0	-	Q8N1G4	S	0	0	12.0	21.32	16	0	0.065	0.572	0.8	0	0	1	O	0.5309		-0.2589999999999999		0.8044	0.352
6ZXD_k	k	Q	41	0	-	Q8N1G4	B	1	0	81.0	21.07	16	0	0.438	0.561	0.8	0	0	1	O	0.667		-4.648		0.5518	0.014
6ZXD_k	k	L	42	0	-	Q8N1G4	U	0	0	4.0	19.37	16	0	0.022	0.486	0.8	0	0	1	O	0.4976		-13.858		0.006	0.007
6ZXD_k	k	P	43	0	-	Q8N1G4	U	0	0	11.0	18.95	16	0	0.059	0.468	0.8	0	0	1	O	0.5085		-9.214		0.0928	0.012
6ZXD_k	k	P	44	0	-	Q8N1G4	T	0	0	94.0	24.12	16	0	0.508	0.696	0.8	0	0	1	O	0.7125		-5.456		0.4927	0.007
6ZXD_k	k	R	45	0	-	Q8N1G4	T	0	0	151.0	18.05	16	0	0.816	0.428	0.8	0	0	1	O	0.7647		1.956		0.9212	0.785
6ZXD_k	k	L	46	0	-	Q8N1G4	T	0	0	1.0	18.11	16	0	0.005	0.431	0.8	0	0	1	O	0.4804		-0.7550000000000003		0.7629	0.175
6ZXD_k	k	F	47	0	-	Q8N1G4	T	0	0	16.0	20.48	16	0	0.086	0.535	0.8	0	0	1	O	0.5319		-9.088		0.1031	0.001
6ZXD_k	k	T	48	0	-	Q8N1G4	U	0	0	91.0	19.81	16	0	0.492	0.506	0.8	0	0	1	O	0.6761		-5.287000000000001		0.4908	0.068
6ZXD_k	k	L	49	0	-	Q8N1G4	U	0	0	11.0	18.19	16	0	0.059	0.434	0.8	0	0	1	O	0.5019		-9.821000000000002		0.0676	0.002
6ZXD_k	k	P	50	0	-	Q8N1G4	S	0	0	76.0	15.78	16	0	0.411	0.328	0.8	0	0	1	O	0.616		-0.6969999999999998		0.813	0.673
6ZXD_k	k	L	51	0	-	Q8N1G4	S	0	0	60.0	16.18	16	0	0.324	0.346	0.8	0	0	1	O	0.5869		-2.172		0.7209	0.129
6ZXD_k	k	L	52	0	-	Q8N1G4	U	0	0	1.0	13.37	16	0	0.005	0.222	0.8	0	0	1	O	0.4403		-5.333		0.3656	0.028
6ZXD_k	k	H	53	0	-	Q8N1G4	S	0	0	47.0	12.53	16	0	0.254	0.185	0.8	0	0	1	O	0.5295		-0.2949999999999999		0.8024	0.237
6ZXD_k	k	Y	54	0	-	Q8N1G4	E	1	1	59.0	12.91	0	0	0.319	0.202	0.0	1	0	0	B	0.417		0.159		0.7848	0.127
6ZXD_k	k	L	55	0	-	Q8N1G4	E	1	1	0.0	15.54	0	0	0.0	0.318	0.0	1	0	0	B	0.3228		-4.014		0.4378	0.009
6ZXD_k	k	E	56	0	-	Q8N1G4	E	1	1	37.0	18.26	0	0	0.2	0.437	0.0	1	0	0	B	0.4162		0.026		0.7785	0.021
6ZXD_k	k	V	57	0	-	Q8N1G4	E	1	1	3.0	17.27	0	0	0.016	0.394	0.0	1	0	0	B	0.3414		-8.084		0.1164	0.0
6ZXD_k	k	S	58	0	-	Q8N1G4	E	0	1	15.0	16.57	0	0	0.081	0.363	0.0	1	0	0	B	0.3589		-5.063000000000001		0.3542	0.0
6ZXD_k	k	G	59	0	-	Q8N1G4	S	0	0	46.0	17.09	10	0	0.249	0.386	0.5	0	0	1	O	0.4304		2.885		0.8737	0.527
6ZXD_k	k	C	60	0	-	Q8N1G4	U	0	0	7.0	21.03	10	0	0.038	0.559	0.5	0	0	1	O	0.3836		-5.064		0.3654	0.004
6ZXD_k	k	G	61	0	-	Q8N1G4	T	0	0	51.0	20.46	10	0	0.276	0.534	0.5	0	0	1	O	0.469		-4.833		0.4294	0.022
6ZXD_k	k	S	62	0	-	Q8N1G4	T	0	0	39.0	20.44	10	0	0.211	0.533	0.5	0	0	1	O	0.4438		2.628		0.8713	0.674
6ZXD_k	k	L	63	0	-	Q8N1G4	U	0	0	3.0	16.43	10	0	0.016	0.357	0.5	0	0	1	O	0.3397		-8.883000000000001		0.0799	0.011
6ZXD_k	k	R	64	0	-	Q8N1G4	U	0	0	156.0	15.36	10	0	0.843	0.31	0.5	0	0	1	O	0.6418		-6.556000000000001		0.3381	0.207
6ZXD_k	k	A	65	0	-	Q8N1G4	B	1	0	18.0	14.34	10	0	0.097	0.265	0.5	0	0	1	O	0.3521		-7.198		0.1722	0.007
6ZXD_k	k	P	66	0	-	Q8N1G4	U	0	0	8.0	14.11	10	0	0.043	0.255	0.5	0	0	1	O	0.3315		-5.74		0.2802	0.124
6ZXD_k	k	G	67	0	-	Q8N1G4	U	0	0	2.0	15.87	10	0	0.011	0.332	0.5	0	0	1	O	0.3336		-6.984		0.1817	0.003
6ZXD_k	k	P	68	0	-	Q8N1G4	T	0	0	94.0	16.74	10	0	0.508	0.37	0.5	0	0	1	O	0.5273		2.32		0.8832	0.903
6ZXD_k	k	G	69	0	-	Q8N1G4	H	0	0	16.0	15.95	0	0	0.086	0.336	0.0	0	1	0	H	0.3218		0.3640000000000001		0.7612	0.503
6ZXD_k	k	L	70	0	-	Q8N1G4	H	0	0	2.0	13.72	0	0	0.011	0.237	0.0	0	1	0	H	0.2812		1.5259999999999996		0.796	0.917
6ZXD_k	k	A	71	0	-	Q8N1G4	H	0	0	22.0	15.35	0	0	0.119	0.309	0.0	0	1	0	H	0.3284		-3.413		0.4969	0.611
6ZXD_k	k	Q	72	0	-	Q8N1G4	H	0	0	168.0	17.08	0	0	0.908	0.385	0.0	0	1	0	H	0.6385		-3.064		0.6794	0.201
6ZXD_k	k	G	73	0	-	Q8N1G4	H	0	0	22.0	14.08	0	0	0.119	0.253	0.0	0	1	0	H	0.319		0.1459999999999996		0.7496	0.725
6ZXD_k	k	L	74	0	-	Q8N1G4	U	0	0	1.0	13.75	5	0	0.005	0.239	0.25	0	0	1	O	0.2265		-7.982000000000001		0.1	0.009
6ZXD_k	k	P	75	0	-	Q8N1G4	T	0	0	65.0	13.76	5	0	0.351	0.239	0.25	0	0	1	O	0.3339		-2.981		0.5386	0.411
6ZXD_k	k	Q	76	0	-	Q8N1G4	T	0	0	70.0	17.31	5	0	0.378	0.396	0.25	0	0	1	O	0.3711		1.1510000000000002		0.8101	0.424
6ZXD_k	k	L	77	0	-	Q8N1G4	U	0	0	0.0	11.94	5	0	0.0	0.159	0.25	0	0	1	O	0.2146		-4.237		0.3671	0.034
6ZXD_k	k	H	78	0	-	Q8N1G4	S	0	0	59.0	10.56	5	0	0.319	0.098	0.25	0	0	1	O	0.2995		-2.662		0.5498	0.013
6ZXD_k	k	S	79	0	-	Q8N1G4	E	1	1	26.0	11.61	0	0	0.141	0.144	0.0	1	0	0	B	0.3416		1.211		0.8032	0.329
6ZXD_k	k	L	80	0	-	Q8N1G4	E	1	1	3.0	12.73	0	0	0.016	0.194	0.0	1	0	0	B	0.3075		-3.5809999999999995		0.4712	0.029
6ZXD_k	k	V	81	0	-	Q8N1G4	E	1	1	20.0	15.52	0	0	0.108	0.317	0.0	1	0	0	B	0.3603		-6.104999999999999		0.2596	0.008
6ZXD_k	k	L	82	0	-	Q8N1G4	E	1	0	8.0	15.38	0	0	0.043	0.311	0.0	1	0	0	B	0.3364		-6.914000000000001		0.1875	0.0
6ZXD_k	k	R	83	0	-	Q8N1G4	E	1	0	86.0	14.87	0	0	0.465	0.288	0.0	1	0	0	B	0.4895		-3.3000000000000007		0.5871	0.043
6ZXD_k	k	R	84	0	-	Q8N1G4	S	0	0	165.0	15.49	19	0	0.892	0.315	0.95	0	0	1	O	0.8149		-4.095000000000001		0.6802	0.008
6ZXD_k	k	N	85	0	-	Q8N1G4	S	0	0	9.0	14.45	19	0	0.049	0.27	0.95	0	0	1	O	0.5346		-0.6859999999999999		0.786	0.105
6ZXD_k	k	A	86	0	-	Q8N1G4	U	0	0	42.0	12.94	19	0	0.227	0.203	0.95	0	0	1	O	0.5898		-3.313		0.6357	0.132
6ZXD_k	k	L	87	0	-	Q8N1G4	U	0	0	10.0	13.39	19	0	0.054	0.223	0.95	0	0	1	O	0.5275		-5.754000000000001		0.365	0.008
6ZXD_k	k	G	88	0	-	Q8N1G4	U	0	0	5.0	17.0	19	0	0.027	0.382	0.95	0	0	1	O	0.5476		-6.295		0.3203	0.001
6ZXD_k	k	P	89	0	-	Q8N1G4	S	0	0	59.0	16.49	19	0	0.319	0.359	0.95	0	0	1	O	0.6517		0.1820000000000002		0.8568	0.544
6ZXD_k	k	G	90	0	-	Q8N1G4	S	0	0	17.0	15.87	19	0	0.092	0.332	0.95	0	0	1	O	0.563		-2.471		0.6895	0.064
6ZXD_k	k	L	91	0	-	Q8N1G4	U	0	0	3.0	16.63	19	0	0.016	0.366	0.95	0	0	1	O	0.5403		-5.598000000000001		0.3872	0.136
6ZXD_k	k	S	92	0	-	Q8N1G4	S	0	0	83.0	14.03	19	0	0.449	0.251	0.95	0	0	1	O	0.6781		-8.817		0.1534	0.034
6ZXD_k	k	P	93	0	-	Q8N1G4	S	0	0	24.0	15.28	19	0	0.13	0.306	0.95	0	0	1	O	0.5725		-0.3450000000000002		0.8142	0.343
6ZXD_k	k	E	94	0	-	Q8N1G4	U	0	0	62.0	18.36	19	0	0.335	0.442	0.95	0	0	1	O	0.6716		-4.3740000000000006		0.5812	0.049
6ZXD_k	k	L	95	0	-	Q8N1G4	U	0	0	6.0	17.1	19	0	0.032	0.386	0.95	0	0	1	O	0.5503		-8.064		0.1689	0.03
6ZXD_k	k	G	96	0	-	Q8N1G4	U	0	0	4.0	14.94	19	0	0.022	0.291	0.95	0	0	1	O	0.5282		-9.697		0.0757	0.02
6ZXD_k	k	P	97	0	-	Q8N1G4	U	0	0	70.0	13.01	19	0	0.378	0.206	0.95	0	0	1	O	0.6456		0.474		0.8644	0.745
6ZXD_k	k	L	98	0	-	Q8N1G4	U	0	0	3.0	11.49	19	0	0.016	0.139	0.95	0	0	1	O	0.4965		-10.845		0.0384	0.0
6ZXD_k	k	P	99	0	-	Q8N1G4	T	0	0	82.0	11.05	19	0	0.443	0.12	0.95	0	0	1	O	0.6535		-2.834		0.7037	0.617
6ZXD_k	k	A	100	0	-	Q8N1G4	T	0	0	29.0	10.29	19	0	0.157	0.086	0.95	0	0	1	O	0.5409		1.168		0.8582	0.217
6ZXD_k	k	L	101	0	-	Q8N1G4	U	0	0	4.0	10.18	19	0	0.022	0.081	0.95	0	0	1	O	0.4876		-3.0640000000000005		0.6067	0.197
6ZXD_k	k	R	102	0	-	Q8N1G4	U	0	0	124.0	10.6	19	0	0.67	0.1	0.95	0	0	1	O	0.7254		-0.4240000000000001		0.8563	0.199
6ZXD_k	k	V	103	0	-	Q8N1G4	E	1	1	47.0	9.95	0	0	0.254	0.071	0.0	1	0	0	B	0.3688		-4.234		0.4389	0.024
6ZXD_k	k	L	104	0	-	Q8N1G4	E	1	1	2.0	12.31	0	0	0.011	0.175	0.0	1	0	0	B	0.3027		-8.696		0.0819	0.0
6ZXD_k	k	D	105	0	-	Q8N1G4	E	1	1	19.0	14.15	0	0	0.103	0.256	0.0	1	0	0	B	0.3478		3.78		0.8725	0.675
6ZXD_k	k	L	106	0	-	Q8N1G4	U	0	0	1.0	14.3	20	0	0.005	0.263	1.0	0	0	1	O	0.5389		-4.994000000000001		0.4486	0.0
6ZXD_k	k	S	107	0	-	Q8N1G4	U	0	0	8.0	12.79	20	0	0.043	0.196	1.0	0	0	1	O	0.5407		-5.099		0.4387	0.006
6ZXD_k	k	G	108	0	-	Q8N1G4	S	0	0	33.0	12.03	20	0	0.178	0.163	1.0	0	0	1	O	0.5859		-1.35		0.7703	0.233
6ZXD_k	k	N	109	0	-	Q8N1G4	S	0	0	10.0	12.65	20	0	0.054	0.19	1.0	0	0	1	O	0.5438		-0.2689999999999998		0.8082	0.242
6ZXD_k	k	A	110	0	-	Q8N1G4	U	0	0	38.0	13.2	20	0	0.205	0.215	1.0	0	0	1	O	0.6057		2.616		0.9044	0.783
6ZXD_k	k	L	111	0	-	Q8N1G4	U	0	0	0.0	15.88	20	0	0.0	0.333	1.0	0	0	1	O	0.5504		-5.905000000000001		0.3607	0.001
6ZXD_k	k	E	112	0	-	Q8N1G4	U	0	0	28.0	17.43	20	0	0.151	0.401	1.0	0	0	1	O	0.6199		-3.887		0.6001	0.006
6ZXD_k	k	A	113	0	-	Q8N1G4	U	0	0	27.0	17.54	20	0	0.146	0.406	1.0	0	0	1	O	0.619		-4.009		0.5884	0.446
6ZXD_k	k	L	114	0	-	Q8N1G4	U	0	0	4.0	17.89	20	0	0.022	0.421	1.0	0	0	1	O	0.5755		-10.265		0.0618	0.003
6ZXD_k	k	P	115	0	-	Q8N1G4	U	0	0	41.0	17.0	20	0	0.222	0.382	1.0	0	0	1	O	0.6422		-6.18		0.3776	0.03
6ZXD_k	k	P	116	0	-	Q8N1G4	T	0	0	113.0	17.08	20	0	0.611	0.385	1.0	0	0	1	O	0.7669		-1.5199999999999996		0.825	0.43
6ZXD_k	k	G	117	0	-	Q8N1G4	T	0	0	42.0	21.62	20	0	0.227	0.585	1.0	0	0	1	O	0.6791		-1.352		0.8037	0.08
6ZXD_k	k	Q	118	0	-	Q8N1G4	S	0	0	81.0	17.41	20	0	0.438	0.4	1.0	0	0	1	O	0.7179		2.478		0.9215	0.968
6ZXD_k	k	G	119	0	-	Q8N1G4	S	0	0	1.0	16.44	20	0	0.005	0.357	1.0	0	0	1	O	0.5569		-0.907		0.783	0.891
6ZXD_k	k	L	120	0	-	Q8N1G4	S	0	0	2.0	17.15	20	0	0.011	0.389	1.0	0	0	1	O	0.5653		-6.632000000000001		0.2953	0.004
6ZXD_k	k	G	121	0	-	Q8N1G4	U	0	0	4.0	17.03	20	0	0.022	0.383	1.0	0	0	1	O	0.5683		-6.103000000000001		0.3492	0.015
6ZXD_k	k	P	122	0	-	Q8N1G4	U	0	0	28.0	19.45	20	0	0.151	0.49	1.0	0	0	1	O	0.636		-3.882		0.6088	0.127
6ZXD_k	k	A	123	0	-	Q8N1G4	T	0	0	16.0	19.59	20	0	0.086	0.496	1.0	0	0	1	O	0.6134		-10.938		0.0461	0.0
6ZXD_k	k	E	124	0	-	Q8N1G4	T	0	0	175.0	20.36	20	0	0.946	0.53	1.0	0	0	1	O	0.861		-3.697000000000001		0.7334	0.751
6ZXD_k	k	P	125	0	-	Q8N1G4	T	0	0	81.0	18.57	20	0	0.438	0.451	1.0	0	0	1	O	0.7258		-7.093999999999999		0.3229	0.018
6ZXD_k	k	P	126	0	-	Q8N1G4	T	0	0	77.0	16.78	20	0	0.416	0.372	1.0	0	0	1	O	0.7065		-8.677		0.1718	0.0
6ZXD_k	k	G	127	0	-	Q8N1G4	S	0	0	1.0	16.15	20	0	0.005	0.344	1.0	0	0	1	O	0.5544		-0.7340000000000002		0.7906	0.456
6ZXD_k	k	L	128	0	-	Q8N1G4	S	0	0	3.0	14.27	20	0	0.016	0.262	1.0	0	0	1	O	0.5429		-5.104		0.4393	0.13
6ZXD_k	k	P	129	0	-	Q8N1G4	S	0	0	34.0	14.37	20	0	0.184	0.266	1.0	0	0	1	O	0.6073		-2.236		0.7253	0.49
6ZXD_k	k	Q	130	0	-	Q8N1G4	S	0	0	88.0	13.73	20	0	0.476	0.238	1.0	0	0	1	O	0.7043		1.73		0.907	0.182
6ZXD_k	k	L	131	0	-	Q8N1G4	U	0	0	0.0	12.09	20	0	0.0	0.166	1.0	0	0	1	O	0.5183		-1.8960000000000004		0.7101	0.045
6ZXD_k	k	Q	132	0	-	Q8N1G4	U	0	0	78.0	10.95	20	0	0.422	0.115	1.0	0	0	1	O	0.6657		-3.165		0.6842	0.034
6ZXD_k	k	S	133	0	-	Q8N1G4	E	1	1	37.0	11.46	0	0	0.2	0.138	0.0	1	0	0	B	0.3614		1.3120000000000005		0.8129	0.846
6ZXD_k	k	L	134	0	-	Q8N1G4	E	1	1	0.0	12.85	0	0	0.0	0.199	0.0	1	0	0	B	0.3031		-3.0670000000000006		0.516	0.128
6ZXD_k	k	N	135	0	-	Q8N1G4	E	1	0	27.0	12.02	0	0	0.146	0.163	0.0	1	0	0	B	0.3466		2.624		0.8478	0.478
6ZXD_k	k	L	136	0	-	Q8N1G4	U	0	0	0.0	12.89	12	0	0.0	0.201	0.6	0	0	1	O	0.348		-4.013000000000001		0.4501	0.0
6ZXD_k	k	S	137	0	-	Q8N1G4	U	0	0	21.0	11.63	12	0	0.114	0.145	0.6	0	0	1	O	0.3789		-6.279999999999999		0.2517	0.011
6ZXD_k	k	G	138	0	-	Q8N1G4	S	0	0	40.0	13.12	12	0	0.216	0.211	0.6	0	0	1	O	0.4293		-2.289		0.642	0.013
6ZXD_k	k	N	139	0	-	Q8N1G4	U	0	0	0.0	14.46	12	0	0.0	0.27	0.6	0	0	1	O	0.3601		-5.199999999999999		0.3417	0.004
6ZXD_k	k	R	140	0	-	Q8N1G4	U	0	0	122.0	15.91	12	0	0.659	0.334	0.6	0	0	1	O	0.622		-1.217		0.7905	0.223
6ZXD_k	k	L	141	0	-	Q8N1G4	U	0	0	0.0	18.21	12	0	0.0	0.435	0.6	0	0	1	O	0.39		-9.298		0.0714	0.001
6ZXD_k	k	R	142	0	-	Q8N1G4	S	0	0	113.0	22.76	12	0	0.611	0.636	0.6	0	0	1	O	0.6586		-10.157		0.0771	0.001
6ZXD_k	k	E	143	0	-	Q8N1G4	S	0	0	89.0	25.45	12	0	0.481	0.754	0.6	0	0	1	O	0.6333		-0.2970000000000004		0.8348	0.094
6ZXD_k	k	L	144	0	-	Q8N1G4	U	0	0	12.0	23.67	12	0	0.065	0.676	0.6	0	0	1	O	0.4601		-10.214		0.0506	0.0
6ZXD_k	k	P	145	0	-	Q8N1G4	U	0	0	17.0	23.19	12	0	0.092	0.655	0.6	0	0	1	O	0.4665		-8.807		0.1044	0.0
6ZXD_k	k	A	146	0	-	Q8N1G4	T	0	0	43.0	22.46	12	0	0.232	0.622	0.6	0	0	1	O	0.5144		-3.125000000000001		0.6147	0.0
6ZXD_k	k	D	147	0	-	Q8N1G4	T	0	0	23.0	24.61	12	0	0.124	0.717	0.6	0	0	1	O	0.4909		2.8430000000000004		0.8859	0.947
6ZXD_k	k	L	148	0	-	Q8N1G4	H	0	0	1.0	21.06	0	0	0.005	0.561	0.0	0	1	0	H	0.3324		-7.148000000000001		0.1701	0.045
6ZXD_k	k	A	149	0	-	Q8N1G4	H	0	0	7.0	18.46	0	0	0.038	0.446	0.0	0	1	0	H	0.3241		-7.914000000000001		0.1218	0.036
6ZXD_k	k	R	150	0	-	Q8N1G4	H	0	0	91.0	19.04	0	0	0.492	0.472	0.0	0	1	0	H	0.4975		-2.3180000000000005		0.6711	0.114
6ZXD_k	k	C	151	0	-	Q8N1G4	H	0	0	0.0	18.81	0	0	0.0	0.462	0.0	0	1	0	H	0.3139		-8.131		0.1086	0.004
6ZXD_k	k	A	152	0	-	Q8N1G4	U	0	0	1.0	12.98	5	0	0.005	0.205	0.25	0	0	1	O	0.2219		-9.628		0.0443	0.002
6ZXD_k	k	P	153	0	-	Q8N1G4	T	0	0	46.0	12.2	5	0	0.249	0.17	0.25	0	0	1	O	0.2885		-3.4400000000000004		0.475	0.025
6ZXD_k	k	R	154	0	-	Q8N1G4	T	0	0	121.0	12.07	5	0	0.654	0.165	0.25	0	0	1	O	0.4311		1.476		0.8383	0.846
6ZXD_k	k	L	155	0	-	Q8N1G4	U	0	0	1.0	8.98	5	0	0.005	0.029	0.25	0	0	1	O	0.1993		-2.3720000000000003		0.5271	0.205
6ZXD_k	k	Q	156	0	-	Q8N1G4	U	0	0	85.0	8.95	5	0	0.459	0.027	0.25	0	0	1	O	0.3347		-5.010000000000001		0.3484	0.001
6ZXD_k	k	S	157	0	-	Q8N1G4	E	1	1	28.0	9.48	0	0	0.151	0.051	0.0	1	0	0	B	0.329		1.3120000000000005		0.803	0.597
6ZXD_k	k	L	158	0	-	Q8N1G4	E	1	1	3.0	9.6	0	0	0.016	0.056	0.0	1	0	0	B	0.2853		-3.5680000000000005		0.4617	0.125
6ZXD_k	k	N	159	0	-	Q8N1G4	E	0	1	47.0	10.6	0	0	0.254	0.1	0.0	1	0	0	B	0.374		3.398		0.8713	0.846
6ZXD_k	k	L	160	0	-	Q8N1G4	U	0	0	1.0	12.32	20	0	0.005	0.176	1.0	0	0	1	O	0.5221		-3.748		0.5629	0.001
6ZXD_k	k	T	161	0	-	Q8N1G4	T	0	0	45.0	13.03	20	0	0.243	0.207	1.0	0	0	1	O	0.6182		-7.164000000000001		0.2675	0.007
6ZXD_k	k	G	162	0	-	Q8N1G4	T	0	0	34.0	14.99	20	0	0.184	0.293	1.0	0	0	1	O	0.6123		-4.893000000000001		0.4976	0.014
6ZXD_k	k	N	163	0	-	Q8N1G4	U	0	0	2.0	16.6	20	0	0.011	0.364	1.0	0	0	1	O	0.5605		1.7220000000000002		0.8773	0.145
6ZXD_k	k	C	164	0	-	Q8N1G4	U	0	0	57.0	17.3	20	0	0.308	0.395	1.0	0	0	1	O	0.6744		-1.586		0.7902	0.069
6ZXD_k	k	L	165	0	-	Q8N1G4	U	0	0	0.0	16.68	20	0	0.0	0.368	1.0	0	0	1	O	0.5571		-8.24		0.1587	0.0
6ZXD_k	k	D	166	0	-	Q8N1G4	S	0	0	81.0	16.23	20	0	0.438	0.348	1.0	0	0	1	O	0.7097		-5.913		0.4417	0.008
6ZXD_k	k	S	167	0	-	Q8N1G4	S	0	0	42.0	15.38	20	0	0.227	0.311	1.0	0	0	1	O	0.6313		-2.615		0.7096	0.021
6ZXD_k	k	F	168	0	-	Q8N1G4	U	0	0	16.0	17.03	20	0	0.086	0.383	1.0	0	0	1	O	0.5925		-9.469		0.0961	0.0
6ZXD_k	k	P	169	0	-	Q8N1G4	U	0	0	27.0	16.64	20	0	0.146	0.366	1.0	0	0	1	O	0.6117		-6.2940000000000005		0.3506	0.01
6ZXD_k	k	A	170	0	-	Q8N1G4	T	0	0	57.0	17.06	20	0	0.308	0.385	1.0	0	0	1	O	0.6727		-4.048		0.6125	0.0
6ZXD_k	k	E	171	0	-	Q8N1G4	T	0	0	99.0	19.7	20	0	0.535	0.501	1.0	0	0	1	O	0.7618		2.845		0.9328	0.894
6ZXD_k	k	L	172	0	-	Q8N1G4	S	0	0	6.0	18.43	20	0	0.032	0.445	1.0	0	0	1	O	0.5838		-5.274000000000001		0.4429	0.003
6ZXD_k	k	F	173	0	-	Q8N1G4	S	0	0	8.0	20.04	20	0	0.043	0.516	1.0	0	0	1	O	0.6012		-10.789		0.0489	0.001
6ZXD_k	k	R	174	0	-	Q8N1G4	U	0	0	88.0	20.09	20	0	0.476	0.518	1.0	0	0	1	O	0.7473		-6.454		0.4026	0.174
6ZXD_k	k	P	175	0	-	Q8N1G4	T	0	0	87.0	19.1	20	0	0.47	0.474	1.0	0	0	1	O	0.739		-4.072		0.6442	0.01
6ZXD_k	k	G	176	0	-	Q8N1G4	T	0	0	59.0	13.11	20	0	0.319	0.211	1.0	0	0	1	O	0.6464		-7.112		0.2845	0.001
6ZXD_k	k	A	177	0	-	Q8N1G4	S	0	0	4.0	13.64	20	0	0.022	0.234	1.0	0	0	1	O	0.5399		0.5479999999999996		0.8384	0.74
6ZXD_k	k	L	178	0	-	Q8N1G4	S	0	0	1.0	11.27	20	0	0.005	0.13	1.0	0	0	1	O	0.5132		-7.583		0.1929	0.016
6ZXD_k	k	P	179	0	-	Q8N1G4	T	0	0	53.0	9.77	20	0	0.286	0.063	1.0	0	0	1	O	0.6077		2.765		0.9071	0.877
6ZXD_k	k	L	180	0	-	Q8N1G4	T	0	0	59.0	8.99	20	0	0.319	0.029	1.0	0	0	1	O	0.6136		-2.482		0.7112	0.044
6ZXD_k	k	L	181	0	-	Q8N1G4	U	0	0	2.0	9.16	20	0	0.011	0.037	1.0	0	0	1	O	0.4976		-5.484		0.3778	0.015
6ZXD_k	k	S	182	0	-	Q8N1G4	U	0	0	34.0	10.29	20	0	0.184	0.086	1.0	0	0	1	O	0.5737		-1.998		0.7268	0.456
6ZXD_k	k	E	183	0	-	Q8N1G4	E	1	1	68.0	10.14	0	0	0.368	0.08	0.0	1	0	0	B	0.4126		4.296		0.8938	0.985
6ZXD_k	k	L	184	0	-	Q8N1G4	E	1	1	5.0	9.84	0	0	0.027	0.067	0.0	1	0	0	B	0.2905		-3.8050000000000006		0.442	0.006
6ZXD_k	k	A	185	0	-	Q8N1G4	E	1	1	7.0	10.55	0	0	0.038	0.098	0.0	1	0	0	B	0.299		-3.42		0.4819	0.001
6ZXD_k	k	A	186	0	-	Q8N1G4	U	0	0	0.0	11.63	10	0	0.0	0.145	0.5	0	0	1	O	0.2987		-0.653		0.6977	0.019
6ZXD_k	k	A	187	0	-	Q8N1G4	U	0	0	5.0	12.1	10	0	0.027	0.166	0.5	0	0	1	O	0.311		-3.798000000000001		0.4525	0.066
6ZXD_k	k	D	188	0	-	Q8N1G4	S	0	0	71.0	14.06	10	0	0.384	0.252	0.5	0	0	1	O	0.4565		-2.616		0.6289	0.058
6ZXD_k	k	N	189	0	-	Q8N1G4	S	0	0	0.0	15.36	10	0	0.0	0.31	0.5	0	0	1	O	0.3261		-1.398		0.6608	0.506
6ZXD_k	k	C	190	0	-	Q8N1G4	U	0	0	63.0	19.06	10	0	0.341	0.473	0.5	0	0	1	O	0.4824		-4.211		0.4981	0.018
6ZXD_k	k	L	191	0	-	Q8N1G4	U	0	0	0.0	16.85	10	0	0.0	0.375	0.5	0	0	1	O	0.3372		-9.915		0.047	0.0
6ZXD_k	k	R	192	0	-	Q8N1G4	S	0	0	152.0	17.38	10	0	0.822	0.399	0.5	0	0	1	O	0.6501		-4.500000000000001		0.5575	0.003
6ZXD_k	k	E	193	0	-	Q8N1G4	U	0	0	78.0	18.74	10	0	0.422	0.459	0.5	0	0	1	O	0.5112		-0.8320000000000003		0.7703	0.125
6ZXD_k	k	L	194	0	-	Q8N1G4	U	0	0	14.0	14.75	10	0	0.076	0.283	0.5	0	0	1	O	0.3478		-11.135		0.0243	0.0
6ZXD_k	k	S	195	0	-	Q8N1G4	U	0	0	30.0	12.7	10	0	0.162	0.193	0.5	0	0	1	O	0.3625		-11.441		0.0209	0.0
6ZXD_k	k	P	196	0	-	Q8N1G4	G	0	0	80.0	12.78	0	0	0.432	0.196	0.0	0	1	0	H	0.4215		-0.8070000000000004		0.7377	0.067
6ZXD_k	k	D	197	0	S01.269	Q8N1G4	G	0	0	71.0	15.68	0	0	0.384	0.324	0.0	0	1	0	H	0.4275		-1.654		0.6873	0.044
6ZXD_k	k	I	198	0	-	Q8N1G4	G	0	0	0.0	14.21	0	0	0.0	0.259	0.0	0	1	0	H	0.2812		-3.981		0.4211	0.02
6ZXD_k	k	A	199	0	-	Q8N1G4	G	0	0	27.0	13.79	0	0	0.146	0.241	0.0	0	1	0	H	0.3261		-4.944		0.3508	0.008
6ZXD_k	k	H	200	0	-	Q8N1G4	G	0	0	84.0	18.22	0	0	0.454	0.436	0.0	0	1	0	H	0.4758		5.705		0.9192	0.882
6ZXD_k	k	L	201	0	-	Q8N1G4	U	0	0	1.0	16.08	5	0	0.005	0.341	0.25	0	0	1	O	0.2406		-5.1530000000000005		0.2958	0.008
6ZXD_k	k	A	202	0	-	Q8N1G4	T	0	0	64.0	13.63	5	0	0.346	0.233	0.25	0	0	1	O	0.3311		-1.7479999999999998		0.6379	0.003
6ZXD_k	k	S	203	0	-	Q8N1G4	T	0	0	31.0	12.54	5	0	0.168	0.185	0.25	0	0	1	O	0.2657		4.8260000000000005		0.8715	0.966
6ZXD_k	k	L	204	0	-	Q8N1G4	U	0	0	1.0	12.96	5	0	0.005	0.204	0.25	0	0	1	O	0.2218		-3.2790000000000004		0.4581	0.011
6ZXD_k	k	K	205	0	-	Q8N1G4	U	0	0	80.0	14.38	5	0	0.432	0.267	0.25	0	0	1	O	0.3674		-4.061000000000001		0.4549	0.018
6ZXD_k	k	T	206	0	-	Q8N1G4	E	1	1	31.0	13.86	0	0	0.168	0.244	0.0	1	0	0	B	0.3689		-2.88		0.5645	0.006
6ZXD_k	k	L	207	0	-	Q8N1G4	E	1	0	3.0	13.08	0	0	0.016	0.209	0.0	1	0	0	B	0.31		-8.094		0.1097	0.0
6ZXD_k	k	D	208	0	-	Q8N1G4	E	1	0	39.0	11.35	0	0	0.211	0.133	0.0	1	0	0	B	0.3644		0.7230000000000001		0.7915	0.032
6ZXD_k	k	L	209	0	-	Q8N1G4	U	0	0	0.0	11.57	12	0	0.0	0.143	0.6	0	0	1	O	0.3378		-4.181000000000001		0.429	0.0
6ZXD_k	k	S	210	0	-	Q8N1G4	U	0	0	20.0	11.72	12	0	0.108	0.149	0.6	0	0	1	O	0.3774		-6.528		0.2305	0.001
6ZXD_k	k	N	211	0	-	Q8N1G4	S	0	0	83.0	13.82	12	0	0.449	0.242	0.6	0	0	1	O	0.5252		-0.3800000000000001		0.7971	0.532
6ZXD_k	k	N	212	0	-	Q8N1G4	S	0	0	6.0	15.47	12	0	0.032	0.315	0.6	0	0	1	O	0.3798		1.164		0.8132	0.631
6ZXD_k	k	Q	213	0	-	Q8N1G4	U	0	0	76.0	15.4	12	0	0.411	0.311	0.6	0	0	1	O	0.5238		0.2289999999999999		0.8221	0.161
6ZXD_k	k	L	214	0	-	Q8N1G4	U	0	0	0.0	14.89	12	0	0.0	0.289	0.6	0	0	1	O	0.3635		-6.0520000000000005		0.2654	0.001
6ZXD_k	k	S	215	0	-	Q8N1G4	U	0	0	33.0	15.34	12	0	0.178	0.309	0.6	0	0	1	O	0.4334		-6.161999999999999		0.2835	0.0
6ZXD_k	k	E	216	0	-	Q8N1G4	U	0	0	86.0	13.84	12	0	0.465	0.243	0.6	0	0	1	O	0.5316		0.3519999999999996		0.8291	0.386
6ZXD_k	k	I	217	0	-	Q8N1G4	U	0	0	7.0	12.28	12	0	0.038	0.174	0.6	0	0	1	O	0.3567		-9.43		0.0628	0.0
6ZXD_k	k	P	218	0	-	Q8N1G4	U	0	0	15.0	14.45	12	0	0.081	0.27	0.6	0	0	1	O	0.3896		-7.241		0.18	0.0
6ZXD_k	k	A	219	0	-	Q8N1G4	T	0	0	56.0	16.49	12	0	0.303	0.359	0.6	0	0	1	O	0.4912		-0.975		0.7552	0.04
6ZXD_k	k	E	220	1	M10.003	Q8N1G4	T	0	0	27.0	16.94	12	0	0.146	0.379	0.6	0	0	1	O	0.4344		5.507		0.9111	0.967
6ZXD_k	k	L	221	0	-	Q8N1G4	G	0	0	0.0	14.25	0	0	0.0	0.261	0.0	0	1	0	H	0.2815		-8.580000000000002		0.0834	0.003
6ZXD_k	k	A	222	0	-	Q8N1G4	G	0	0	9.0	16.08	0	0	0.049	0.341	0.0	0	1	0	H	0.3102		-11.043		0.0239	0.0
6ZXD_k	k	D	223	0	-	Q8N1G4	G	0	0	119.0	18.84	0	0	0.643	0.463	0.0	0	1	0	H	0.5542		-2.2230000000000003		0.7033	0.081
6ZXD_k	k	C	224	0	-	Q8N1G4	U	0	0	6.0	18.27	18	0	0.032	0.438	0.9	0	0	1	O	0.5377		-6.866		0.2618	0.004
6ZXD_k	k	P	225	0	-	Q8N1G4	T	0	0	98.0	16.56	18	0	0.53	0.363	0.9	0	0	1	O	0.704		-5.864		0.4439	0.003
6ZXD_k	k	K	226	0	-	Q8N1G4	T	0	0	94.0	14.85	18	0	0.508	0.287	0.9	0	0	1	O	0.6843		-1.0		0.8217	0.111
6ZXD_k	k	L	227	0	-	Q8N1G4	U	0	0	12.0	15.73	18	0	0.065	0.326	0.9	0	0	1	O	0.5289		-3.661000000000001		0.5744	0.002
6ZXD_k	k	K	228	0	-	Q8N1G4	U	0	0	132.0	17.88	18	0	0.714	0.421	0.9	0	0	1	O	0.768		-4.42		0.6275	0.001
6ZXD_k	k	E	229	0	-	Q8N1G4	B	1	0	117.0	19.42	18	0	0.632	0.489	0.9	0	0	1	O	0.7544		1.789		0.9169	0.002
6ZXD_k	k	I	230	0	-	Q8N1G4	U	0	0	15.0	12.91	18	0	0.081	0.202	0.9	0	0	1	O	0.5112		-8.995		0.1037	3.749
6ZXD_k	k	N	231	0	-	Q8N1G4	U	0	0	39.0	10.1	18	0	0.211	0.078	0.9	0	0	1	O	0.5376		-0.9360000000000004		0.7745	0.017
6ZXD_k	k	F	232	0	-	Q8N1G4	U	0	0	1.0	10.44	18	0	0.005	0.093	0.9	0	0	1	O	0.4607		-4.224		0.4858	0.001
6ZXD_k	k	R	233	0	-	Q8N1G4	U	0	0	114.0	10.72	18	0	0.616	0.105	0.9	0	0	1	O	0.6901		-5.133		0.5146	0.007
6ZXD_k	k	G	234	0	-	Q8N1G4	S	0	0	50.0	13.13	18	0	0.27	0.211	0.9	0	0	1	O	0.5854		-2.1580000000000004		0.7212	0.0
6ZXD_k	k	N	235	0	-	Q8N1G4	S	0	0	13.0	14.82	18	0	0.07	0.286	0.9	0	0	1	O	0.5231		-4.477		0.4928	0.004
6ZXD_k	k	K	236	0	-	Q8N1G4	U	0	0	134.0	14.85	18	0	0.724	0.287	0.9	0	0	1	O	0.7519		-0.1839999999999999		0.871	0.194
6ZXD_k	k	L	237	0	-	Q8N1G4	U	0	0	17.0	14.09	18	0	0.092	0.254	0.9	0	0	1	O	0.5255		-9.722		0.0744	2.35
6ZXD_k	k	R	238	0	-	Q8N1G4	S	0	0	152.0	13.3	18	0	0.822	0.219	0.9	0	0	1	O	0.77		-9.947		0.1072	5.65
6ZXD_k	k	D	239	0	-	Q8N1G4	S	0	0	61.0	11.46	18	0	0.33	0.138	0.9	0	0	1	O	0.5943		-3.5730000000000004		0.6154	0.0
6ZXD_k	k	K	240	0	-	Q8N1G4	S	0	0	127.0	10.54	18	0	0.686	0.097	0.9	0	0	1	O	0.7116		-8.639000000000001		0.1762	0.0
6ZXD_k	k	R	241	0	-	Q8N1G4	S	0	0	111.0	9.88	18	0	0.6	0.068	0.9	0	0	1	O	0.6785		-3.778		0.6397	0.011
6ZXD_k	k	L	242	0	-	Q8N1G4	H	0	0	4.0	20.58	0	0	0.022	0.54	0.0	0	1	0	H	0.3346		-6.540000000000001		0.2149	0.0
6ZXD_k	k	E	243	0	-	Q8N1G4	H	0	0	56.0	10.69	0	0	0.303	0.104	0.0	0	1	0	H	0.3571		-4.177		0.4387	0.0
6ZXD_k	k	K	244	0	-	Q8N1G4	H	0	0	134.0	10.17	0	0	0.724	0.081	0.0	0	1	0	H	0.512		2.132		0.8758	0.028
6ZXD_k	k	M	245	0	-	Q8N1G4	H	0	0	35.0	8.81	0	0	0.189	0.021	0.0	0	1	0	H	0.3038		-1.1110000000000002		0.6706	0.013
6ZXD_k	k	V	246	0	-	Q8N1G4	H	0	0	11.0	9.74	0	0	0.059	0.062	0.0	0	1	0	H	0.2691		-10.172		0.0361	0.0
6ZXD_k	k	S	247	0	-	Q8N1G4	H	0	0	61.0	10.29	0	0	0.33	0.086	0.0	0	1	0	H	0.3635		-3.819		0.4761	0.0
6ZXD_k	k	G	248	0	-	Q8N1G4	H	0	0	64.0	12.67	0	0	0.346	0.191	0.0	0	1	0	H	0.3884		3.66		0.8791	0.565
6ZXD_k	k	C	249	0	-	Q8N1G4	S	0	0	79.0	12.34	2	0	0.427	0.177	0.1	0	0	1	O	0.2903		-4.007		0.423	0.024
6ZXD_k	k	Q	250	0	-	Q8N1G4	U	0	0	115.0	14.87	2	0	0.622	0.288	0.1	0	0	1	O	0.3763		-3.263		0.5342	0.121
6ZXD_k	k	T	251	0	-	Q8N1G4	H	0	0	21.0	13.24	0	0	0.114	0.216	0.0	0	1	0	H	0.3111		-6.09		0.2428	0.006
6ZXD_k	k	R	252	0	-	Q8N1G4	H	0	0	144.0	13.49	0	0	0.778	0.227	0.0	0	1	0	H	0.5609		-5.098000000000001		0.4493	0.001
6ZXD_k	k	S	253	0	-	Q8N1G4	H	0	0	36.0	11.15	0	0	0.195	0.124	0.0	0	1	0	H	0.3229		0.7520000000000001		0.7789	0.038
6ZXD_k	k	I	254	0	-	Q8N1G4	H	0	0	6.0	9.38	0	0	0.032	0.046	0.0	0	1	0	H	0.2585		-3.7		0.4367	0.035
6ZXD_k	k	L	255	0	-	Q8N1G4	H	0	0	13.0	9.73	0	0	0.07	0.062	0.0	0	1	0	H	0.2724		-8.81		0.0734	2.449
6ZXD_k	k	E	256	0	-	Q8N1G4	H	0	0	78.0	9.48	0	0	0.422	0.051	0.0	0	1	0	H	0.3907		-1.891		0.6543	0.06
6ZXD_k	k	Y	257	0	-	Q8N1G4	H	0	0	3.0	10.02	0	0	0.016	0.074	0.0	0	1	0	H	0.2579		0.3680000000000001		0.7382	0.322
6ZXD_k	k	L	258	0	-	Q8N1G4	H	0	0	14.0	9.92	0	0	0.076	0.07	0.0	0	1	0	H	0.2755		-6.7730000000000015		0.1797	0.003
6ZXD_k	k	R	259	0	-	Q8N1G4	H	0	0	120.0	9.7	0	0	0.649	0.06	0.0	0	1	0	H	0.4788		-1.5120000000000005		0.7185	0.02
6ZXD_k	k	V	260	0	-	Q8N1G4	T	0	0	93.0	9.52	16	0	0.503	0.052	0.8	0	0	1	O	0.5991		-7.6		0.2211	0.0
6ZXD_k	k	G	261	0	-	Q8N1G4	T	0	0	65.0	9.85	16	0	0.351	0.067	0.8	0	0	1	O	0.5443		-3.794		0.57	0.019
6ZXD_k	k	G	262	0	-	Q8N1G4	U	0	0	24.0	11.99	16	0	0.13	0.161	0.8	0	0	1	O	0.4768		-0.0450000000000003		0.7959	0.232
6ZXD_k	k	R	263	0	-	Q8N1G4	S	0	0	113.0	11.85	16	0	0.611	0.155	0.8	0	0	1	O	0.6568		-3.032		0.6903	0.026
6ZXD_k	k	G	264	0	-	Q8N1G4	U	0	0	52.0	15.32	16	0	0.281	0.308	0.8	0	0	1	O	0.5634		-3.343		0.6201	0.003
6ZXD_k	k	G	265	0	-	Q8N1G4	U	0	0	133.0	16.57	16	0	0.719	0.363	0.8	0	0	1	O	0.7267		-0.8049999999999999		0.8427	0.01
6ZXD_k	k	V	323	0	-	Q8N1G4	U	0	0	143.0	16.06	16	0	0.773	0.341	0.8	0	0	1	O	0.7397		-4.005		0.6505	0.008
6ZXD_k	k	R	324	0	-	Q8N1G4	U	0	0	64.0	19.19	16	0	0.346	0.478	0.8	0	0	1	O	0.6195		-5.053		0.4848	0.011
6ZXD_k	k	V	325	0	-	Q8N1G4	U	0	0	103.0	18.86	16	0	0.557	0.464	0.8	0	0	1	O	0.6909		-7.347		0.2812	0.0
6ZXD_k	k	S	326	0	-	Q8N1G4	U	0	0	59.0	17.58	16	0	0.319	0.407	0.8	0	0	1	O	0.5964		-8.506		0.1516	0.003
6ZXD_k	k	P	327	0	-	Q8N1G4	S	0	0	107.0	20.89	16	0	0.578	0.553	0.8	0	0	1	O	0.7121		-2.6710000000000003		0.7406	0.077
6ZXD_k	k	E	328	0	-	Q8N1G4	U	0	0	64.0	18.64	16	0	0.346	0.454	0.8	0	0	1	O	0.6151		-6.631		0.3179	0.034
6ZXD_k	k	V	329	0	-	Q8N1G4	U	0	0	55.0	17.66	16	0	0.297	0.411	0.8	0	0	1	O	0.5889		-6.445		0.3244	0.07
6ZXD_k	k	P	334	0	-	Q8N1G4	U	0	0	105.0	15.36	16	0	0.568	0.31	0.8	0	0	1	O	0.6687		-0.9130000000000004		0.8205	0.082
6ZXD_k	k	Y	335	0	-	Q8N1G4	U	0	0	65.0	17.93	16	0	0.351	0.423	0.8	0	0	1	O	0.6113		3.308		0.9157	0.923
6ZXD_k	k	I	336	0	-	Q8N1G4	U	0	0	88.0	18.53	16	0	0.476	0.449	0.8	0	0	1	O	0.6608		-0.3409999999999995		0.8412	0.747
6ZXD_k	k	V	337	0	-	Q8N1G4	E	1	0	44.0	17.67	0	0	0.238	0.411	0.0	1	0	0	B	0.4257		-5.473		0.3451	0.001
6ZXD_k	k	G	338	0	-	Q8N1G4	E	1	0	60.0	15.45	0	0	0.324	0.314	0.0	1	0	0	B	0.4401		1.949		0.8541	0.033
6ZXD_k	k	A	339	0	-	Q8N1G4	E	1	0	71.0	14.78	0	0	0.384	0.284	0.0	1	0	0	B	0.4574		1.9630000000000003		0.8588	0.747
6ZXD_k	k	V	340	0	-	Q8N1G4	E	1	0	86.0	15.54	0	0	0.465	0.318	0.0	1	0	0	B	0.4953		-0.6349999999999998		0.7746	0.059
6ZXD_k	k	V	341	0	-	Q8N1G4	U	0	0	57.0	16.15	7	0	0.308	0.344	0.35	0	0	1	O	0.3789		-7.337		0.1702	0.003
6ZXD_k	k	R	342	0	-	Q8N1G4	S	0	0	113.0	18.39	7	0	0.611	0.443	0.35	0	0	1	O	0.5132		-1.6529999999999998		0.7238	0.049
6ZXD_k	k	G	343	0	-	Q8N1G4	S	0	0	83.0	18.2	7	0	0.449	0.435	0.35	0	0	1	O	0.4489		-0.7790000000000004		0.7498	0.001
6ZXD_k	k	M	344	0	-	Q8N1G4	U	0	0	41.0	18.24	7	0	0.222	0.437	0.35	0	0	1	O	0.3645		-6.276		0.2467	0.007
6ZXD_k	k	D	345	0	-	Q8N1G4	U	0	0	89.0	15.27	7	0	0.481	0.306	0.35	0	0	1	O	0.4366		-1.5850000000000002		0.6959	0.114
6ZXD_k	k	L	346	0	-	Q8N1G4	U	0	0	58.0	14.9	7	0	0.314	0.289	0.35	0	0	1	O	0.3711		-5.177000000000001		0.3488	0.005
6ZXD_k	k	Q	347	0	-	Q8N1G4	U	0	0	83.0	15.34	7	0	0.449	0.309	0.35	0	0	1	O	0.425		-9.818		0.0584	0.0
6ZXD_k	k	P	348	0	-	Q8N1G4	H	0	0	31.0	16.72	0	0	0.168	0.37	0.0	0	1	0	H	0.3562		-0.1069999999999999		0.7506	0.157
6ZXD_k	k	G	349	0	-	Q8N1G4	H	0	0	84.0	15.61	0	0	0.454	0.321	0.0	0	1	0	H	0.4537		-4.879		0.4172	0.001
6ZXD_k	k	N	350	0	-	Q8N1G4	H	0	0	101.0	16.72	0	0	0.546	0.37	0.0	0	1	0	H	0.4987		3.3839999999999995		0.8968	0.149
6ZXD_k	k	A	351	0	-	Q8N1G4	H	0	0	38.0	19.18	0	0	0.205	0.478	0.0	0	1	0	H	0.3891		0.189		0.7766	0.639
6ZXD_k	k	L	352	0	-	Q8N1G4	H	0	0	45.0	18.34	0	0	0.243	0.441	0.0	0	1	0	H	0.3964		-4.248		0.4511	0.0
6ZXD_k	k	K	353	0	-	Q8N1G4	H	0	0	84.0	17.65	0	0	0.454	0.411	0.0	0	1	0	H	0.471		-6.050000000000001		0.3098	0.0
6ZXD_k	k	R	354	0	-	Q8N1G4	H	0	0	59.0	19.61	0	0	0.319	0.497	0.0	0	1	0	H	0.4355		0.197		0.7927	0.06
6ZXD_k	k	F	355	0	-	Q8N1G4	H	0	0	62.0	19.81	0	0	0.335	0.506	0.0	0	1	0	H	0.4434		0.4240000000000001		0.8048	0.125
6ZXD_k	k	L	356	0	-	Q8N1G4	H	0	0	62.0	19.05	0	0	0.335	0.472	0.0	0	1	0	H	0.4369		-8.459		0.1163	0.0
6ZXD_k	k	T	357	0	-	Q8N1G4	H	0	0	60.0	18.5	0	0	0.324	0.448	0.0	0	1	0	H	0.4281		-3.285		0.5579	0.022
6ZXD_k	k	S	358	0	-	Q8N1G4	H	0	0	43.0	15.79	0	0	0.232	0.329	0.0	0	1	0	H	0.3718		-0.7150000000000003		0.7234	0.037
6ZXD_k	k	Q	359	0	-	Q8N1G4	H	0	0	72.0	15.15	0	0	0.389	0.3	0.0	0	1	0	H	0.4248		-2.722		0.6051	0.004
6ZXD_k	k	T	360	0	-	Q8N1G4	H	0	0	62.0	14.21	0	0	0.335	0.259	0.0	0	1	0	H	0.3969		-3.876		0.4873	0.005
6ZXD_k	k	K	361	0	-	Q8N1G4	H	0	0	66.0	15.01	0	0	0.357	0.294	0.0	0	1	0	H	0.4116		-1.411		0.6968	0.221
6ZXD_k	k	L	362	0	-	Q8N1G4	I	0	0	42.0	14.35	0	0	0.227	0.265	0.0	0	1	0	H	0.3586		-6.711		0.2096	0.0
6ZXD_k	k	H	363	0	-	Q8N1G4	I	0	0	35.0	16.2	0	0	0.189	0.347	0.0	0	1	0	H	0.3596		-9.427		0.0632	3.999
6ZXD_k	k	E	364	0	-	Q8N1G4	I	0	0	58.0	15.16	0	0	0.314	0.301	0.0	0	1	0	H	0.3968		-7.245000000000001		0.1818	0.0
6ZXD_k	k	D	365	0	-	Q8N1G4	I	0	0	94.0	18.36	0	0	0.508	0.442	0.0	0	1	0	H	0.4979		-0.6929999999999997		0.7726	0.151
6ZXD_k	k	L	366	0	-	Q8N1G4	I	0	0	76.0	18.97	0	0	0.411	0.469	0.0	0	1	0	H	0.4655		-6.722		0.2464	0.0
6ZXD_k	k	C	367	0	-	Q8N1G4	T	0	0	13.0	17.95	9	0	0.07	0.424	0.45	0	0	1	O	0.3498		-10.688		0.0315	1.149
6ZXD_k	k	E	368	0	-	Q8N1G4	T	0	0	50.0	14.31	9	0	0.27	0.263	0.45	0	0	1	O	0.3932		-2.529		0.6059	0.013
6ZXD_k	k	K	369	0	-	Q8N1G4	T	0	0	42.0	14.56	9	0	0.227	0.274	0.45	0	0	1	O	0.3794		-4.183		0.4491	0.007
6ZXD_k	k	R	370	0	-	Q8N1G4	T	0	0	41.0	13.89	9	0	0.222	0.245	0.45	0	0	1	O	0.3723		-3.838		0.4787	0.006
6ZXD_k	k	T	371	0	-	Q8N1G4	T	0	0	55.0	13.69	9	0	0.297	0.236	0.45	0	0	1	O	0.3982		-3.318		0.54	0.001
6ZXD_k	k	A	372	0	-	Q8N1G4	S	0	0	59.0	16.33	9	0	0.319	0.352	0.45	0	0	1	O	0.4282		-5.042999999999999		0.3884	0.001
6ZXD_k	k	A	373	0	-	Q8N1G4	U	0	0	31.0	18.38	9	0	0.168	0.443	0.45	0	0	1	O	0.3886		1.4329999999999998		0.825	0.099
6ZXD_k	k	T	374	0	-	Q8N1G4	U	0	0	31.0	19.19	9	0	0.168	0.478	0.45	0	0	1	O	0.3951		3.734		0.8818	0.744
6ZXD_k	k	L	375	0	-	Q8N1G4	U	0	0	52.0	17.05	9	0	0.281	0.384	0.45	0	0	1	O	0.4199		-4.175000000000001		0.47	0.052
6ZXD_k	k	A	376	0	-	Q8N1G4	E	1	0	65.0	13.23	0	0	0.351	0.216	0.0	1	0	0	B	0.4318		-3.164		0.5705	0.044
6ZXD_k	k	T	377	0	-	Q8N1G4	E	1	0	74.0	13.69	0	0	0.4	0.236	0.0	1	0	0	B	0.4544		-4.331		0.4721	0.005
6ZXD_k	k	H	378	0	-	Q8N1G4	E	1	0	32.0	17.86	0	0	0.173	0.42	0.0	1	0	0	B	0.4029		-5.5		0.3323	0.002
6ZXD_k	k	E	379	0	-	Q8N1G4	U	0	0	27.0	19.12	12	0	0.146	0.475	0.6	0	0	1	O	0.4528		0.7379999999999999		0.8198	0.219
6ZXD_k	k	L	380	0	-	Q8N1G4	T	0	0	57.0	24.23	12	0	0.308	0.7	0.6	0	0	1	O	0.5587		-6.189		0.336	0.0
6ZXD_k	k	R	381	0	-	Q8N1G4	T	0	0	77.0	20.19	12	0	0.416	0.522	0.6	0	0	1	O	0.5661		-4.419		0.5211	0.004
6ZXD_k	k	A	382	0	-	Q8N1G4	S	0	0	71.0	18.01	12	0	0.384	0.426	0.6	0	0	1	O	0.5355		3.804		0.9095	0.276
6ZXD_k	k	V	383	0	-	Q8N1G4	U	0	0	52.0	22.41	12	0	0.281	0.62	0.6	0	0	1	O	0.533		-8.833		0.1165	0.0
6ZXD_k	k	K	384	0	-	Q8N1G4	U	0	0	83.0	21.16	12	0	0.449	0.565	0.6	0	0	1	O	0.5868		-7.833		0.1977	0.002
6ZXD_k	k	G	385	0	-	Q8N1G4	S	0	0	67.0	21.12	12	0	0.362	0.563	0.6	0	0	1	O	0.5533		-3.927		0.5621	0.002
6ZXD_k	k	P	386	0	-	Q8N1G4	S	0	0	88.0	21.21	12	0	0.476	0.567	0.6	0	0	1	O	0.5973		0.8080000000000002		0.862	0.234
6ZXD_k	k	L	387	0	-	Q8N1G4	U	0	0	55.0	18.72	12	0	0.297	0.458	0.6	0	0	1	O	0.508		-5.275		0.4041	0.005
6ZXD_k	k	L	388	0	-	Q8N1G4	B	1	0	57.0	18.77	12	0	0.308	0.46	0.6	0	0	1	O	0.5126		-1.0590000000000004		0.7587	0.165
6ZXD_k	k	Y	389	0	-	Q8N1G4	U	0	0	49.0	18.75	12	0	0.265	0.459	0.6	0	0	1	O	0.4957		-4.544		0.472	0.051
6ZXD_k	k	C	390	0	-	Q8N1G4	U	0	0	29.0	19.05	12	0	0.157	0.472	0.6	0	0	1	O	0.4564		-6.689		0.2458	0.03
6ZXD_k	k	A	391	0	-	Q8N1G4	E	1	0	24.0	19.72	0	0	0.13	0.502	0.0	1	0	0	B	0.4021		-10.885		0.0312	0.0
6ZXD_k	k	R	392	0	-	Q8N1G4	E	1	0	50.0	18.26	0	0	0.27	0.437	0.0	1	0	0	B	0.4429		-9.183		0.0834	0.026
6ZXD_k	k	P	393	0	-	Q8N1G4	U	0	0	65.0	18.85	20	0	0.351	0.463	1.0	0	0	1	O	0.7001		-3.631		0.6629	0.029
6ZXD_k	k	P	394	0	-	Q8N1G4	S	0	0	46.0	19.16	20	0	0.249	0.477	1.0	0	0	1	O	0.6682		-9.066		0.1345	0.002
6ZXD_k	k	Q	395	0	-	Q8N1G4	S	0	0	85.0	20.18	20	0	0.459	0.522	1.0	0	0	1	O	0.7429		-3.94		0.6578	0.009
6ZXD_k	k	D	396	0	-	Q8N1G4	S	0	0	89.0	21.4	20	0	0.481	0.576	1.0	0	0	1	O	0.7571		4.586		0.9478	0.932
6ZXD_k	k	L	397	0	-	Q8N1G4	U	0	0	43.0	23.48	20	0	0.232	0.667	1.0	0	0	1	O	0.6944		-3.79		0.6466	0.001
6ZXD_k	k	K	398	0	-	Q8N1G4	U	0	0	63.0	18.3	20	0	0.341	0.439	1.0	0	0	1	O	0.6929		-4.987		0.5313	0.058
6ZXD_k	k	I	399	0	-	Q8N1G4	U	0	0	45.0	13.87	20	0	0.243	0.244	1.0	0	0	1	O	0.625		-7.061		0.2801	0.001
6ZXD_k	k	V	400	0	-	Q8N1G4	U	0	0	55.0	14.0	20	0	0.297	0.25	1.0	0	0	1	O	0.6455		-8.159		0.1917	0.0
6ZXD_k	k	P	401	0	-	Q8N1G4	S	0	0	49.0	16.95	20	0	0.265	0.38	1.0	0	0	1	O	0.657		-1.3209999999999995		0.7976	0.301
6ZXD_k	k	L	402	0	-	Q8N1G4	S	0	0	77.0	21.67	20	0	0.416	0.588	1.0	0	0	1	O	0.7399		-5.502		0.5028	0.003
6ZXD_k	k	G	403	0	-	Q8N1G4	S	0	0	85.0	31.03	20	0	0.459	1.0	1.0	0	0	1	O	0.807		-1.834		0.8236	0.239
6ZXD_k	k	R	404	0	-	Q8N1G4	S	0	0	84.0	24.71	20	0	0.454	0.722	1.0	0	0	1	O	0.7699		-1.0960000000000003		0.8439	0.371
6ZXD_k	k	K	405	0	-	Q8N1G4	U	0	0	93.0	15.41	20	0	0.503	0.312	1.0	0	0	1	O	0.7245		-4.433		0.6034	0.0
6ZXD_k	k	E	406	0	-	Q8N1G4	U	0	0	68.0	14.87	20	0	0.368	0.288	1.0	0	0	1	O	0.6767		-2.0490000000000004		0.7653	0.009
6ZXD_k	k	A	407	0	-	Q8N1G4	U	0	0	38.0	14.47	20	0	0.205	0.27	1.0	0	0	1	O	0.6158		-3.0400000000000005		0.6706	0.0
6ZXD_k	k	K	408	0	-	Q8N1G4	S	0	0	34.0	18.47	20	0	0.184	0.447	1.0	0	0	1	O	0.6402		-2.7390000000000003		0.7046	0.003
6ZXD_k	k	A	409	0	-	Q8N1G4	S	0	0	91.0	17.21	20	0	0.492	0.391	1.0	0	0	1	O	0.7332		-2.458		0.763	0.002
6ZXD_k	k	K	410	0	-	Q8N1G4	S	0	0	61.0	20.48	20	0	0.33	0.535	1.0	0	0	1	O	0.7049		-3.131		0.7049	0.0
6ZXD_k	k	E	411	0	-	Q8N1G4	S	0	0	53.0	22.64	20	0	0.286	0.63	1.0	0	0	1	O	0.706		1.0130000000000003		0.8925	0.075
6ZXD_k	k	L	412	0	-	Q8N1G4	S	0	0	68.0	18.84	20	0	0.368	0.463	1.0	0	0	1	O	0.7056		-5.251		0.5107	0.0
6ZXD_k	k	V	413	0	-	Q8N1G4	H	0	0	67.0	16.93	0	0	0.362	0.379	0.0	0	1	0	H	0.4295		-10.586		0.0389	3.75
6ZXD_k	k	R	414	0	-	Q8N1G4	H	0	0	69.0	18.57	0	0	0.373	0.451	0.0	0	1	0	H	0.4474		-1.807		0.6855	0.045
6ZXD_k	k	Q	415	0	-	Q8N1G4	H	0	0	52.0	20.43	0	0	0.281	0.533	0.0	0	1	0	H	0.4279		2.007		0.8526	0.04
6ZXD_k	k	L	416	0	-	Q8N1G4	H	0	0	57.0	18.07	0	0	0.308	0.429	0.0	0	1	0	H	0.4185		-5.231000000000002		0.3654	0.02
6ZXD_k	k	Q	417	0	-	Q8N1G4	H	0	0	64.0	15.25	0	0	0.346	0.305	0.0	0	1	0	H	0.4095		0.2660000000000001		0.787	0.272
6ZXD_k	k	L	418	0	-	Q8N1G4	H	0	0	78.0	14.74	0	0	0.422	0.282	0.0	0	1	0	H	0.434		-5.005000000000001		0.395	0.0
6ZXD_k	k	E	419	0	-	Q8N1G4	H	0	0	28.0	15.18	0	0	0.151	0.302	0.0	0	1	0	H	0.3383		-6.718999999999999		0.2024	0.0
6ZXD_k	k	A	420	0	-	Q8N1G4	U	0	0	40.0	11.99	15	0	0.216	0.161	0.75	0	0	1	O	0.4874		-3.3350000000000004		0.583	0.001
6ZXD_k	k	E	421	0	-	Q8N1G4	U	0	0	70.0	10.42	15	0	0.378	0.092	0.75	0	0	1	O	0.5369		-4.442		0.5035	0.003
6ZXD_k	k	R	424	0	-	Q8N1G4	U	0	0	71.0	9.83	15	0	0.384	0.066	0.75	0	0	1	O	0.5342		-2.065		0.7055	0.001
6ZXD_k	k	K	425	0	-	Q8N1G4	T	0	0	148.0	9.98	15	0	0.8	0.073	0.75	0	0	1	O	0.6875		-2.8520000000000003		0.7175	0.0
6ZXD_k	k	Q	426	0	-	Q8N1G4	T	0	0	147.0	9.98	15	0	0.795	0.073	0.75	0	0	1	O	0.6858		-6.791		0.335	2.75
6ZXD_k	k	K	427	0	-	Q8N1G4	T	0	0	93.0	11.21	15	0	0.503	0.127	0.75	0	0	1	O	0.5912		-4.702		0.5059	0.0
6ZXD_k	k	K	428	0	-	Q8N1G4	T	0	0	185.0	8.33	15	0	1.0	0.0	0.75	0	0	1	O	0.7393		-4.284		0.6252	0.013
6ZXD_k	k	R	429	0	-	Q8N1G4	U	0	0	168.0	10.56	15	0	0.908	0.098	0.75	0	0	1	O	0.7262		-2.954		0.7273	0.002
6ZXD_k	k	Q	430	0	-	Q8N1G4	S	0	0	172.0	10.03	15	0	0.93	0.075	0.75	0	0	1	O	0.7294		-1.791		0.7992	0.004
6ZXD_k	k	S	431	0	-	Q8N1G4	S	0	0	86.0	14.23	15	0	0.465	0.26	0.75	0	0	1	O	0.6017		-0.5250000000000001		0.8158	0.064
6ZXD_k	k	V	432	0	-	Q8N1G4	U	0	0	56.0	16.66	15	0	0.303	0.367	0.75	0	0	1	O	0.5607		-6.634		0.2931	0.0
6ZXD_k	k	S	433	0	-	Q8N1G4	U	0	0	75.0	18.89	15	0	0.405	0.465	0.75	0	0	1	O	0.6173		-4.406		0.5493	0.001
6ZXD_k	k	G	434	0	-	Q8N1G4	S	0	0	47.0	18.89	15	0	0.254	0.465	0.75	0	0	1	O	0.5606		2.1140000000000003		0.886	0.727
6ZXD_k	k	L	435	0	-	Q8N1G4	T	0	0	72.0	23.08	15	0	0.389	0.65	0.75	0	0	1	O	0.6448		-6.523		0.343	0.024
6ZXD_k	k	H	436	0	-	Q8N1G4	T	0	0	31.0	21.88	15	0	0.168	0.597	0.75	0	0	1	O	0.5528		-6.7780000000000005		0.2762	0.003
6ZXD_k	k	R	437	0	-	Q8N1G4	G	0	0	75.0	20.27	0	0	0.405	0.526	0.0	0	1	0	H	0.4742		-1.812		0.6968	0.228
6ZXD_k	k	Y	438	0	-	Q8N1G4	G	0	0	12.0	21.86	0	0	0.065	0.596	0.0	0	1	0	H	0.3596		-0.518		0.7299	0.106
6ZXD_k	k	L	439	0	-	Q8N1G4	G	0	0	65.0	23.58	0	0	0.351	0.672	0.0	0	1	0	H	0.4814		-9.846000000000002		0.0641	0.001
6ZXD_k	k	H	440	0	-	Q8N1G4	G	0	0	89.0	22.2	0	0	0.481	0.611	0.0	0	1	0	H	0.5201		1.4460000000000002		0.8607	0.196
6ZXD_k	k	L	441	0	-	Q8N1G4	U	0	0	65.0	14.79	5	0	0.351	0.285	0.25	0	0	1	O	0.3418		-1.36		0.6702	0.172
6ZXD_k	k	L	442	0	-	Q8N1G4	U	0	0	112.0	12.58	5	0	0.605	0.187	0.25	0	0	1	O	0.4166		-5.388000000000001		0.3492	0.0
6ZXD_k	k	N	445	0	-	Q8N1G4	U	0	0	146.0	16.03	5	0	0.789	0.339	0.25	0	0	1	O	0.5167		-2.588		0.6595	0.043
6ZXD_k	k	E	446	0	-	Q8N1G4	U	0	0	93.0	17.28	5	0	0.503	0.394	0.25	0	0	1	O	0.417		-4.269		0.4593	0.007
6ZXD_k	k	N	447	0	-	Q8N1G4	U	0	0	62.0	21.21	5	0	0.335	0.567	0.25	0	0	1	O	0.3865		-5.883000000000001		0.2896	0.005
6ZXD_k	k	Y	448	0	-	Q8N1G4	E	1	0	47.0	20.09	0	0	0.254	0.518	0.0	1	0	0	B	0.4522		-11.147		0.0296	0.001
6ZXD_k	k	P	449	0	-	Q8N1G4	E	1	0	59.0	16.61	0	0	0.319	0.365	0.0	1	0	0	B	0.4479		-1.2529999999999997		0.7219	0.107
6ZXD_k	k	C	450	0	-	Q8N1G4	U	0	0	35.0	17.99	20	0	0.189	0.426	1.0	0	0	1	O	0.6382		-0.1999999999999996		0.8399	0.452
6ZXD_k	k	L	451	0	-	Q8N1G4	U	0	0	24.0	18.83	20	0	0.13	0.463	1.0	0	0	1	O	0.6235		-1.7960000000000005		0.7595	0.53
6ZXD_k	k	V	452	0	-	Q8N1G4	B	1	0	53.0	22.05	20	0	0.286	0.604	1.0	0	0	1	O	0.7018		-8.091		0.2171	0.002
6ZXD_k	k	D	453	0	-	Q8N1G4	U	0	0	32.0	21.18	20	0	0.173	0.566	1.0	0	0	1	O	0.6572		-2.515		0.7278	0.025
6ZXD_k	k	A	454	0	-	Q8N1G4	S	0	0	92.0	17.62	20	0	0.497	0.409	1.0	0	0	1	O	0.7374		-3.583		0.6849	0.015
6ZXD_k	k	D	455	0	-	Q8N1G4	S	0	0	104.0	20.33	20	0	0.562	0.529	1.0	0	0	1	O	0.7732		-6.036		0.463	0.002
6ZXD_k	k	G	456	0	-	Q8N1G4	S	0	0	73.0	18.77	20	0	0.395	0.46	1.0	0	0	1	O	0.7138		-2.9750000000000005		0.7203	0.017
6ZXD_k	k	D	457	0	-	Q8N1G4	U	0	0	46.0	16.84	20	0	0.249	0.375	1.0	0	0	1	O	0.6505		0.1270000000000003		0.8547	0.435
6ZXD_k	k	V	458	0	-	Q8N1G4	U	0	0	33.0	16.08	20	0	0.178	0.341	1.0	0	0	1	O	0.6189		-2.5660000000000003		0.7076	0.036
6ZXD_k	k	I	459	0	-	Q8N1G4	U	0	0	43.0	18.33	20	0	0.232	0.441	1.0	0	0	1	O	0.6561		-11.003999999999998		0.0485	0.0
6ZXD_k	k	S	460	0	-	Q8N1G4	U	0	0	36.0	17.42	20	0	0.195	0.4	1.0	0	0	1	O	0.6357		-5.836		0.4107	0.083
6ZXD_k	k	F	461	0	-	Q8N1G4	U	0	0	46.0	18.61	20	0	0.249	0.453	1.0	0	0	1	O	0.6641		-8.733		0.1551	0.038
6ZXD_k	k	P	462	0	-	Q8N1G4	T	0	0	44.0	19.27	20	0	0.238	0.482	1.0	0	0	1	O	0.6653		-5.823		0.4277	0.009
6ZXD_k	k	P	463	0	-	Q8N1G4	T	0	0	62.0	17.2	20	0	0.335	0.391	1.0	0	0	1	O	0.6829		0.6569999999999996		0.8786	0.116
6ZXD_k	k	I	464	0	-	Q8N1G4	T	0	0	89.0	20.52	20	0	0.481	0.537	1.0	0	0	1	O	0.7515		-2.675		0.7567	0.035
6ZXD_k	k	T	465	0	-	Q8N1G4	U	0	0	56.0	20.99	20	0	0.303	0.558	1.0	0	0	1	O	0.6999		-2.678		0.735	0.036
6ZXD_k	k	N	466	0	-	Q8N1G4	U	0	0	39.0	20.48	20	0	0.211	0.535	1.0	0	0	1	O	0.6651		-1.419		0.7955	0.017
6ZXD_k	k	S	467	0	-	Q8N1G4	U	0	0	15.0	20.06	20	0	0.081	0.517	1.0	0	0	1	O	0.6154		-2.491		0.7114	0.006
6ZXD_k	k	E	468	0	-	Q8N1G4	S	0	0	67.0	18.26	20	0	0.362	0.437	1.0	0	0	1	O	0.6995		-1.16		0.8195	0.024
6ZXD_k	k	K	469	0	-	Q8N1G4	T	0	0	54.0	18.34	20	0	0.292	0.441	1.0	0	0	1	O	0.6768		-2.825		0.7147	0.003
6ZXD_k	k	T	470	0	-	Q8N1G4	T	0	0	20.0	18.15	20	0	0.108	0.433	1.0	0	0	1	O	0.61		-3.884		0.5953	4.949
6ZXD_k	k	K	471	0	-	Q8N1G4	U	0	0	54.0	18.76	20	0	0.292	0.459	1.0	0	0	1	O	0.6798		-2.4650000000000003		0.7407	0.001
6ZXD_k	k	V	472	0	-	Q8N1G4	U	0	0	100.0	15.92	20	0	0.541	0.334	1.0	0	0	1	O	0.7394		-3.793		0.6686	3.049
6ZXD_k	k	K	473	0	-	Q8N1G4	U	0	0	54.0	17.24	20	0	0.292	0.393	1.0	0	0	1	O	0.6686		-3.787		0.6339	0.0
6ZXD_k	k	K	474	0	-	Q8N1G4	S	0	0	104.0	13.34	20	0	0.562	0.221	1.0	0	0	1	O	0.7287		0.2279999999999998		0.8775	0.307
6ZXD_k	k	T	475	0	-	Q8N1G4	U	0	0	75.0	17.02	20	0	0.405	0.383	1.0	0	0	1	O	0.7047		-4.4670000000000005		0.5897	0.001
6ZXD_k	k	T	476	0	-	Q8N1G4	U	0	0	55.0	16.52	20	0	0.297	0.361	1.0	0	0	1	O	0.6649		-9.68		0.0996	8.299
6ZXD_k	k	S	477	0	-	Q8N1G4	U	0	0	66.0	16.12	20	0	0.357	0.343	1.0	0	0	1	O	0.6823		-6.007000000000001		0.4168	0.0
6ZXD_k	k	D	478	0	-	Q8N1G4	U	0	0	42.0	15.88	20	0	0.227	0.333	1.0	0	0	1	O	0.6352		0.8799999999999999		0.8733	0.488
6ZXD_k	k	L	479	0	-	Q8N1G4	U	0	0	33.0	19.5	20	0	0.178	0.492	1.0	0	0	1	O	0.646		-4.160000000000001		0.5882	0.003
6ZXD_k	k	F	480	0	-	Q8N1G4	E	1	1	36.0	19.25	0	0	0.195	0.481	0.0	1	0	0	B	0.4226		-4.194999999999999		0.4694	0.007
6ZXD_k	k	L	481	0	-	Q8N1G4	E	1	1	51.0	15.63	0	0	0.276	0.322	0.0	1	0	0	B	0.4233		-4.711		0.4189	0.005
6ZXD_k	k	E	482	0	-	Q8N1G4	E	1	1	53.0	15.78	0	0	0.286	0.328	0.0	1	0	0	B	0.4283		0.3919999999999998		0.7986	0.035
6ZXD_k	k	V	483	0	-	Q8N1G4	E	1	0	25.0	18.37	0	0	0.135	0.442	0.0	1	0	0	B	0.3929		-3.675		0.5043	0.007
6ZXD_k	k	T	484	0	-	Q8N1G4	U	0	0	38.0	21.01	7	0	0.205	0.559	0.35	0	0	1	O	0.3804		-7.543000000000001		0.1569	0.0
6ZXD_k	k	S	485	0	-	Q8N1G4	U	0	0	96.0	19.53	7	0	0.519	0.493	0.35	0	0	1	O	0.4871		-1.61		0.7157	0.095
6ZXD_k	k	S	488	0	-	Q8N1G4	U	0	0	146.0	19.34	7	0	0.789	0.485	0.35	0	0	1	O	0.5894		1.725		0.8838	0.653
6ZXD_k	k	L	489	0	-	Q8N1G4	U	0	0	98.0	18.87	7	0	0.53	0.464	0.35	0	0	1	O	0.4858		-4.41		0.4803	0.042
6ZXD_k	k	Q	490	0	-	Q8N1G4	S	0	0	63.0	15.57	7	0	0.341	0.319	0.35	0	0	1	O	0.3864		-2.206		0.6285	0.007
6ZXD_k	k	I	491	0	-	Q8N1G4	T	0	0	73.0	15.51	7	1	0.395	0.316	0.35	0	0	1	O	0.6517		-0.9929999999999995		0.8114	0.009
6ZXD_k	k	C	492	0	-	Q8N1G4	T	0	0	49.0	13.4	7	1	0.265	0.223	0.35	0	0	1	O	0.5873		-6.851999999999999		0.2838	0.0
6ZXD_k	k	K	493	0	-	Q8N1G4	H	0	0	61.0	15.79	0	1	0.33	0.329	0.0	0	1	0	H	0.6537		-3.652		0.6382	0.091
6ZXD_k	k	D	494	0	-	Q8N1G4	H	0	0	56.0	15.99	0	1	0.303	0.337	0.0	0	1	0	H	0.6456		0.4370000000000001		0.8632	0.04
6ZXD_k	k	V	495	0	-	Q8N1G4	H	0	0	39.0	16.43	0	1	0.211	0.357	0.0	0	1	0	H	0.6159		-5.1610000000000005		0.4717	0.001
6ZXD_k	k	M	496	0	-	Q8N1G4	H	0	0	60.0	16.86	0	1	0.324	0.376	0.0	0	1	0	H	0.6598		-10.208		0.0753	0.0
6ZXD_k	k	D	497	0	-	Q8N1G4	H	0	0	69.0	16.84	0	1	0.373	0.375	0.0	0	1	0	H	0.6765		-0.9280000000000002		0.8223	0.029
6ZXD_k	k	A	498	0	-	Q8N1G4	H	0	0	58.0	18.08	0	1	0.314	0.43	0.0	0	1	0	H	0.6656		2.427		0.912	0.402
6ZXD_k	k	L	499	0	-	Q8N1G4	H	0	0	58.0	18.6	0	1	0.314	0.452	0.0	0	1	0	H	0.6694		-2.374		0.7423	0.006
6ZXD_k	k	I	500	0	-	Q8N1G4	H	0	0	70.0	18.66	0	1	0.378	0.455	0.0	0	1	0	H	0.6915		-0.1829999999999999		0.8554	0.04
6ZXD_k	k	L	501	0	-	Q8N1G4	S	0	0	75.0	16.15	6	1	0.405	0.344	0.3	0	0	1	O	0.6394		-2.7910000000000004		0.7005	0.001
6ZXD_k	k	K	502	0	-	Q8N1G4	T	0	0	54.0	15.31	6	1	0.292	0.307	0.3	0	0	1	O	0.5911		0.0089999999999997		0.8339	0.008
6ZXD_k	k	M	503	0	-	Q8N1G4	T	0	0	52.0	17.74	6	1	0.281	0.415	0.3	0	0	1	O	0.6071		-2.6340000000000003		0.6974
6ZXD_k	k	A	504	0	-	Q8N1G4	T	0	0	83.0	15.39	6	1	0.449	0.311	0.3	0	0	1	O	0.6492		-3.723		0.6298
6ZXD_k	k	E	505	0	-	Q8N1G4	U	0	0	109.0	15.02	6	1	0.589	0.295	0.3	0	0	1	O	0.6944		3.303		0.9285
4Y24_A	A	C	2	0	-	P09382	U	0	0	152.0	85.08	3	1	0.962	0.878	0.333	0	0	1	O	0.8711	-6.067999999999999			0.5148
4Y24_A	A	G	3	0	-	P09382	U	0	0	38.0	37.74	3	1	0.241	0.295	0.333	0	0	1	O	0.5842	-2.107			0.7241
4Y24_A	A	L	4	0	-	P09382	U	0	0	82.0	22.42	3	1	0.519	0.106	0.333	0	0	1	O	0.6515	-7.281			0.2705
4Y24_A	A	V	5	0	-	P09382	E	1	0	89.0	21.02	0	1	0.563	0.089	0.0	1	0	0	B	0.7239	-6.008			0.439	0.01
4Y24_A	A	A	6	0	-	P09382	E	1	0	22.0	19.89	0	1	0.139	0.075	0.0	1	0	0	B	0.5731	-3.5619999999999994			0.6057	0.0
4Y24_A	A	S	7	0	-	P09382	E	1	0	81.0	21.15	0	1	0.513	0.09	0.0	1	0	0	B	0.7083	-4.122999999999999			0.6239	0.016
4Y24_A	A	N	8	0	-	P09382	E	0	0	138.0	21.9	0	1	0.873	0.099	0.0	1	0	0	B	0.8105	-7.811			0.2889	0.002
4Y24_A	A	L	9	0	-	P09382	E	0	0	29.0	23.12	0	1	0.184	0.114	0.0	1	0	0	B	0.5974	-5.747			0.4004	0.013
4Y24_A	A	N	10	0	-	P09382	E	0	0	86.0	36.49	0	1	0.544	0.279	0.0	1	0	0	B	0.7467	-6.517			0.3954	0.018
4Y24_A	A	L	11	0	-	P09382	E	1	0	3.0	28.97	0	1	0.019	0.187	0.0	1	0	0	B	0.5486	-8.512			0.1388	0.001
4Y24_A	A	K	12	0	-	P09382	U	0	0	83.0	43.23	5	1	0.525	0.362	0.556	0	0	1	O	0.7754	-11.438			0.0486	0.01
4Y24_A	A	P	13	0	-	P09382	T	0	0	59.0	28.41	5	1	0.373	0.18	0.556	0	0	1	O	0.7031	-8.068			0.2196	0.002
4Y24_A	A	G	14	0	-	P09382	T	0	0	65.0	30.46	5	0	0.411	0.205	0.556	0	0	1	O	0.4833	-5.641000000000001			0.3553	0.0
4Y24_A	A	E	15	0	-	P09382	U	0	0	72.0	34.1	5	0	0.456	0.25	0.556	0	0	1	O	0.5095	0.132			0.8139	0.393
4Y24_A	A	C	16	0	-	P09382	U	0	0	27.0	31.1	5	0	0.171	0.213	0.556	0	0	1	O	0.3933	-6.231999999999999			0.2613	0.0
4Y24_A	A	L	17	0	-	P09382	E	1	1	0.0	18.42	0	0	0.0	0.057	0.0	1	0	0	B	0.2804	-6.742000000000001			0.1833	0.005
4Y24_A	A	R	18	0	-	P09382	E	1	1	90.0	35.36	0	0	0.57	0.265	0.0	1	0	0	B	0.5258	-4.452			0.4967	0.002
4Y24_A	A	V	19	0	-	P09382	E	1	1	1.0	17.79	0	0	0.006	0.049	0.0	1	0	0	B	0.281	-6.327999999999999			0.2137	0.005
4Y24_A	A	R	20	0	-	P09382	E	1	1	90.0	37.13	0	0	0.57	0.287	0.0	1	0	0	B	0.5301	-4.844999999999999			0.4593	0.101
4Y24_A	A	G	21	0	-	P09382	E	1	1	0.0	29.55	0	0	0.0	0.194	0.0	1	0	0	B	0.3022	-3.713000000000001			0.4563	0.0
4Y24_A	A	E	22	0	-	P09382	E	1	1	83.0	45.52	0	0	0.525	0.39	0.0	1	0	0	B	0.5325	3.294			0.9017	0.761
4Y24_A	A	V	23	0	-	P09382	E	0	1	4.0	26.56	0	0	0.025	0.157	0.0	1	0	0	B	0.3044	-7.624			0.1335	0.001
4Y24_A	A	A	24	0	-	P09382	U	0	0	26.0	27.97	6	0	0.165	0.174	0.667	0	0	1	O	0.4327	-7.709			0.16	0.023
4Y24_A	A	P	25	0	-	P09382	T	0	0	106.0	32.77	6	0	0.671	0.233	0.667	0	0	1	O	0.6366	-6.292			0.363	0.0
4Y24_A	A	D	26	0	-	P09382	T	0	0	125.0	33.98	6	0	0.791	0.248	0.667	0	0	1	O	0.681	0.3299999999999998			0.8689	0.202
4Y24_A	A	A	27	0	-	P09382	U	0	0	10.0	27.76	6	0	0.063	0.172	0.667	0	0	1	O	0.394	-5.341999999999999			0.3434	0.011
4Y24_A	A	K	28	0	-	P09382	U	0	0	128.0	45.1	6	0	0.81	0.385	0.667	0	0	1	O	0.7097	-6.257			0.4042	0.221
4Y24_A	A	S	29	0	-	P09382	B	1	0	25.0	30.66	6	0	0.158	0.207	0.667	0	0	1	O	0.4363	-4.454000000000001			0.4508	0.001
4Y24_A	A	F	30	0	-	P09382	E	1	0	0.0	18.56	0	0	0.0	0.058	0.0	1	0	0	B	0.2805	-3.94			0.4246	0.009
4Y24_A	A	V	31	0	-	P09382	E	1	0	19.0	15.62	0	0	0.12	0.022	0.0	1	0	0	B	0.3136	-6.894			0.1822	0.0
4Y24_A	A	L	32	0	-	P09382	E	1	1	2.0	17.3	0	0	0.013	0.043	0.0	1	0	0	B	0.2823	-5.994			0.2404	0.007
4Y24_A	A	N	33	0	-	P09382	E	1	1	29.0	14.64	0	0	0.184	0.01	0.0	1	0	0	B	0.3333	-4.734999999999999			0.3739	0.004
4Y24_A	A	L	34	0	-	P09382	E	1	1	1.0	16.69	0	0	0.006	0.035	0.0	1	0	0	B	0.2788	-5.43			0.2867	0.007
4Y24_A	A	G	35	0	-	P09382	E	1	1	0.0	17.07	0	0	0.0	0.04	0.0	1	0	0	B	0.2777	-2.3880000000000003			0.5626	0.006
4Y24_A	A	K	36	0	-	P09382	E	0	0	125.0	35.24	0	0	0.791	0.264	0.0	1	0	0	B	0.6096	-8.074			0.1865	0.001
4Y24_A	A	D	37	0	-	P09382	E	0	1	50.0	20.72	0	0	0.316	0.085	0.0	1	0	0	B	0.3941	-0.1709999999999999			0.7612	0.038
4Y24_A	A	S	38	0	-	P09382	T	0	0	62.0	18.36	2	0	0.392	0.056	0.222	0	0	1	O	0.3059	-5.018999999999999			0.3349	0.005
4Y24_A	A	N	39	0	-	P09382	T	0	0	84.0	21.36	2	0	0.532	0.093	0.222	0	0	1	O	0.3604	-8.073			0.1209	0.0
4Y24_A	A	N	40	0	-	P09382	E	1	1	36.0	19.9	0	0	0.228	0.075	0.0	1	0	0	B	0.3602	-8.928			0.0812	0.003
4Y24_A	A	L	41	0	-	P09382	E	1	1	2.0	14.4	0	0	0.013	0.007	0.0	1	0	0	B	0.2767	-7.682			0.1243	0.032
4Y24_A	A	C	42	0	-	P09382	E	0	0	3.0	16.94	0	0	0.019	0.038	0.0	1	0	0	B	0.2834	-7.166999999999999			0.1559	0.014
4Y24_A	A	L	43	0	-	P09382	E	1	0	0.0	14.63	0	0	0.0	0.01	0.0	1	0	0	B	0.2731	-7.034			0.1617	0.001
4Y24_A	A	H	44	0	-	P09382	E	1	1	21.0	15.38	0	0	0.133	0.019	0.0	1	0	0	B	0.3175	-7.329			0.1543	0.011
4Y24_A	A	F	45	0	-	P09382	E	1	1	1.0	16.15	0	0	0.006	0.029	0.0	1	0	0	B	0.2779	-7.380999999999999			0.1415	0.019
4Y24_A	A	N	46	0	-	P09382	E	0	1	4.0	15.83	0	0	0.025	0.025	0.0	1	0	0	B	0.2832	-13.108			0.0064	0.014
4Y24_A	A	P	47	0	-	P09382	E	0	1	0.0	18.63	0	0	0.0	0.059	0.0	1	0	0	B	0.2807	-8.278999999999998			0.0959	0.009
4Y24_A	A	R	48	0	-	P09382	E	1	1	26.0	22.59	0	0	0.165	0.108	0.0	1	0	0	B	0.3437	-4.686			0.3833	0.023
4Y24_A	A	F	49	0	-	P09382	S	0	0	14.0	27.43	8	0	0.089	0.168	0.889	0	0	1	O	0.5027	-5.789			0.3497	0.001
4Y24_A	A	N	50	0	-	P09382	S	0	0	102.0	60.69	8	0	0.646	0.577	0.889	0	0	1	O	0.7671	-7.675000000000001			0.2828	0.015
4Y24_A	A	A	51	0	-	P09382	B	1	0	11.0	63.63	8	0	0.07	0.614	0.889	0	0	1	O	0.5808	-2.7350000000000003			0.6779	0.001
4Y24_A	A	H	52	0	-	P09382	T	0	0	141.0	81.06	8	0	0.892	0.828	0.889	0	0	1	O	0.8542	-6.263999999999999			0.4831	0.149
4Y24_A	A	G	53	0	-	P09382	T	0	0	80.0	65.39	8	0	0.506	0.635	0.889	0	0	1	O	0.7348	-2.594			0.7551	0.002
4Y24_A	A	D	54	0	-	P09382	B	1	0	37.0	53.44	8	0	0.234	0.488	0.889	0	0	1	O	0.6185	-0.549			0.8201	0.355
4Y24_A	A	A	55	0	-	P09382	U	0	0	56.0	40.66	8	0	0.354	0.331	0.889	0	0	1	O	0.6337	-3.0200000000000005			0.6805	0.015
4Y24_A	A	N	56	0	-	P09382	S	0	0	88.0	35.01	8	0	0.557	0.261	0.889	0	0	1	O	0.692	-6.585			0.3598	0.004
4Y24_A	A	T	57	0	-	P09382	E	1	0	33.0	24.76	0	0	0.209	0.135	0.0	1	0	0	B	0.3641	-4.844			0.3776	0.0
4Y24_A	A	I	58	0	-	P09382	E	1	1	0.0	24.08	0	0	0.0	0.126	0.0	1	0	0	B	0.2913	-8.225			0.1001	0.009
4Y24_A	A	V	59	0	-	P09382	E	1	1	1.0	21.16	0	0	0.006	0.09	0.0	1	0	0	B	0.2875	-8.275			0.0972	0.007
4Y24_A	A	C	60	0	-	P09382	E	1	1	5.0	16.59	0	0	0.032	0.034	0.0	1	0	0	B	0.2869	-5.269999999999999			0.3041	0.01
4Y24_A	A	N	61	0	-	P09382	E	1	0	10.0	16.32	0	0	0.063	0.031	0.0	1	0	0	B	0.2963	-6.813000000000001			0.1829	0.002
4Y24_A	A	S	62	0	-	P09382	E	0	0	4.0	17.2	0	0	0.025	0.042	0.0	1	0	0	B	0.2859	-5.635999999999999			0.2716	0.013
4Y24_A	A	K	63	0	-	P09382	E	1	1	39.0	23.48	0	0	0.247	0.119	0.0	1	0	0	B	0.3749	-7.183			0.1798	0.081
4Y24_A	A	D	64	0	-	P09382	E	1	1	97.0	29.65	0	0	0.614	0.195	0.0	1	0	0	B	0.5294	0.996			0.8501	0.314
4Y24_A	A	G	65	0	-	P09382	T	0	0	59.0	21.54	2	0	0.373	0.095	0.222	0	0	1	O	0.306	-1.8470000000000004			0.619	0.051
4Y24_A	A	G	66	0	-	P09382	T	0	0	37.0	20.95	2	0	0.234	0.088	0.222	0	0	1	O	0.2611	-3.197			0.4841	0.001
4Y24_A	A	A	67	0	-	P09382	E	1	0	58.0	20.55	0	0	0.367	0.083	0.0	1	0	0	B	0.4128	-4.957			0.3896	0.002
4Y24_A	A	W	68	0	-	P09382	E	1	0	128.0	21.87	0	0	0.81	0.099	0.0	1	0	0	B	0.5861	-6.326			0.335	0.0
4Y24_A	A	G	69	0	-	P09382	U	0	0	34.0	19.22	3	0	0.215	0.066	0.333	0	0	1	O	0.2922	-2.995			0.5172	0.006
4Y24_A	A	T	70	0	-	P09382	U	0	0	105.0	20.48	3	0	0.665	0.082	0.333	0	0	1	O	0.4567	-8.431			0.122	0.002
4Y24_A	A	E	71	0	-	P09382	U	0	0	79.0	23.36	3	0	0.5	0.117	0.333	0	0	1	O	0.4007	2.131			0.8489	0.099
4Y24_A	A	Q	72	0	-	P09382	E	1	0	79.0	34.25	0	0	0.5	0.252	0.0	1	0	0	B	0.4961	-3.0450000000000004			0.6125	0.016
4Y24_A	A	R	73	0	-	P09382	E	1	0	105.0	25.72	0	0	0.665	0.147	0.0	1	0	0	B	0.5398	-5.949			0.3512	0.073
4Y24_A	A	E	74	0	-	P09382	E	1	0	70.0	42.13	0	0	0.443	0.349	0.0	1	0	0	B	0.4928	3.966999999999999			0.9041	0.613
4Y24_A	A	A	75	0	-	P09382	S	0	0	108.0	40.93	9	0	0.684	0.334	1.0	0	0	1	O	0.7799	-2.708			0.7662	0.083
4Y24_A	A	V	76	0	-	P09382	U	0	0	59.0	41.6	9	0	0.373	0.342	1.0	0	0	1	O	0.6875	-8.448			0.183	0.01
4Y24_A	A	F	77	0	-	P09382	U	0	0	38.0	30.17	9	0	0.241	0.201	1.0	0	0	1	O	0.6164	-9.208			0.1141	0.013
4Y24_A	A	P	78	0	-	P09382	U	0	0	24.0	34.96	9	0	0.152	0.26	1.0	0	0	1	O	0.5943	-7.593			0.2199	0.189
4Y24_A	A	F	79	0	-	P09382	U	0	0	2.0	28.61	9	0	0.013	0.182	1.0	0	0	1	O	0.5264	-7.996			0.1667	0.008
4Y24_A	A	Q	80	0	-	P09382	U	0	0	129.0	53.1	9	0	0.816	0.484	1.0	0	0	1	O	0.8301	-10.923000000000002			0.0728	0.003
4Y24_A	A	P	81	0	-	P09382	T	0	0	60.0	35.53	9	0	0.38	0.267	1.0	0	0	1	O	0.6773	-8.114			0.2063	0.016
4Y24_A	A	G	82	0	-	P09382	T	0	0	50.0	39.55	9	0	0.316	0.317	1.0	0	0	1	O	0.6638	-2.158			0.7537	0.001
4Y24_A	A	S	83	0	-	P09382	S	0	0	43.0	44.74	9	0	0.272	0.381	1.0	0	0	1	O	0.6596	-7.537			0.2499	0.0
4Y24_A	A	V	84	0	-	P09382	E	1	0	92.0	32.48	0	0	0.582	0.23	0.0	1	0	0	B	0.5237	-6.666999999999999			0.2743	0.001
4Y24_A	A	A	85	0	-	P09382	E	1	0	4.0	29.17	0	0	0.025	0.189	0.0	1	0	0	B	0.3097	-6.6690000000000005			0.1972	0.0
4Y24_A	A	E	86	0	-	P09382	E	1	0	45.0	32.65	0	0	0.285	0.232	0.0	1	0	0	B	0.4098	4.113999999999999			0.8907	0.725
4Y24_A	A	V	87	0	-	P09382	E	1	0	0.0	25.77	0	0	0.0	0.147	0.0	1	0	0	B	0.2946	-6.577			0.1993	0.037
4Y24_A	A	C	88	0	-	P09382	E	1	1	18.0	27.18	0	0	0.114	0.164	0.0	1	0	0	B	0.3356	-6.093999999999999			0.2513	0.038
4Y24_A	A	I	89	0	-	P09382	E	1	1	1.0	21.88	0	0	0.006	0.099	0.0	1	0	0	B	0.2889	-7.318			0.1479	0.006
4Y24_A	A	T	90	0	-	P09382	E	0	1	36.0	27.08	0	0	0.228	0.163	0.0	1	0	0	B	0.376	-5.053999999999999			0.3629	0.053
4Y24_A	A	F	91	0	-	P09382	E	0	1	7.0	24.36	0	0	0.044	0.13	0.0	1	0	0	B	0.3062	-4.161000000000001			0.4159	0.103
4Y24_A	A	D	92	0	-	P09382	U	0	0	67.0	36.58	3	0	0.424	0.28	0.333	0	0	1	O	0.4026	0.054			0.7751	0.398
4Y24_A	A	Q	93	0	-	P09382	S	0	0	103.0	64.1	3	0	0.652	0.619	0.333	0	0	1	O	0.5552	-3.3440000000000003			0.616	0.001
4Y24_A	A	A	94	0	-	P09382	S	0	0	57.0	36.43	3	0	0.361	0.278	0.333	0	0	1	O	0.379	-2.323			0.6158	0.001
4Y24_A	A	N	95	0	-	P09382	E	0	1	56.0	38.43	0	0	0.354	0.303	0.0	1	0	0	B	0.4495	-6.605			0.2504	0.001
4Y24_A	A	L	96	0	-	P09382	E	1	1	0.0	24.4	0	0	0.0	0.13	0.0	1	0	0	B	0.2919	-5.143000000000001			0.3176	0.004
4Y24_A	A	T	97	0	-	P09382	E	1	1	7.0	26.99	0	0	0.044	0.162	0.0	1	0	0	B	0.3115	-4.117999999999999			0.4225	0.005
4Y24_A	A	V	98	0	-	P09382	E	1	1	0.0	26.04	0	0	0.0	0.15	0.0	1	0	0	B	0.2951	-5.657999999999999			0.2732	0.011
4Y24_A	A	K	99	0	-	P09382	E	1	1	92.0	42.42	0	0	0.582	0.352	0.0	1	0	0	B	0.5472	-8.168			0.1608	0.014
4Y24_A	A	L	100	0	-	P09382	E	0	1	2.0	82.93	0	0	0.013	0.851	0.0	1	0	0	B	0.4235	-10.082			0.0507	0.004
4Y24_A	A	P	101	0	-	P09382	T	0	0	43.0	94.99	3	0	0.272	1.0	0.333	0	0	1	O	0.4815	-8.276			0.1366	0.002
4Y24_A	A	D	102	0	-	P09382	T	0	0	148.0	93.43	3	0	0.937	0.981	0.333	0	0	1	O	0.7199	-0.608			0.8482	0.125
4Y24_A	A	G	103	0	-	P09382	T	0	0	75.0	61.28	3	0	0.475	0.585	0.333	0	0	1	O	0.4801	-5.16			0.402	0.016
4Y24_A	A	Y	104	0	-	P09382	E	1	0	103.0	68.01	0	0	0.652	0.668	0.0	1	0	0	B	0.6323	-8.138			0.1889	0.003
4Y24_A	A	E	105	1	S01.269	P09382	E	1	0	107.0	42.99	0	0	0.677	0.359	0.0	1	0	0	B	0.5847	3.731			0.9167	0.828
4Y24_A	A	F	106	0	-	P09382	E	1	0	14.0	52.3	0	0	0.089	0.474	0.0	1	0	0	B	0.3818	-4.441			0.4252	0.012
4Y24_A	A	K	107	0	-	P09382	E	1	0	104.0	45.17	0	0	0.658	0.386	0.0	1	0	0	B	0.5826	-8.62			0.1406	0.003
4Y24_A	A	F	108	0	-	P09382	E	1	0	2.0	20.0	0	0	0.013	0.076	0.0	1	0	0	B	0.2875	-9.076			0.0662	0.0
4Y24_A	A	P	109	0	-	P09382	E	1	0	41.0	22.98	0	0	0.259	0.113	0.0	1	0	0	B	0.3782	-7.810999999999999			0.1397	0.001
4Y24_A	A	N	110	0	-	P09382	U	0	0	20.0	27.06	7	0	0.127	0.163	0.778	0	0	1	O	0.466	-7.422000000000001			0.19	0.003
4Y24_A	A	R	111	0	-	P09382	U	0	0	78.0	24.04	7	0	0.494	0.126	0.778	0	0	1	O	0.5999	-6.504			0.3236	0.0
4Y24_A	A	L	112	0	-	P09382	S	0	0	21.0	29.79	7	0	0.133	0.197	0.778	0	0	1	O	0.4749	-6.781			0.2448	0.001
4Y24_A	A	N	113	0	-	P09382	U	0	0	106.0	63.11	7	0	0.671	0.607	0.778	0	0	1	O	0.7411	-7.058000000000001			0.3341	0.001
4Y24_A	A	L	114	0	-	P09382	U	0	0	41.0	28.36	7	0	0.259	0.179	0.778	0	0	1	O	0.5203	-7.916			0.1706	0.0
4Y24_A	A	E	115	1	S01.269	P09382	S	0	0	158.0	47.79	7	0	1.0	0.418	0.778	0	0	1	O	0.8048	4.747			0.9538	0.286
4Y24_A	A	A	116	0	-	P09382	S	0	0	5.0	25.9	7	0	0.032	0.149	0.778	0	0	1	O	0.4269	-2.6909999999999994			0.6087	0.001
4Y24_A	A	I	117	0	-	P09382	E	1	0	1.0	19.13	0	1	0.006	0.065	0.0	1	0	0	B	0.5201	-7.1160000000000005			0.233	0.025
4Y24_A	A	N	118	0	-	P09382	E	0	0	51.0	19.46	0	1	0.323	0.069	0.0	1	0	0	B	0.6401	-7.068000000000001			0.286	0.003
4Y24_A	A	Y	119	0	-	P09382	E	1	1	34.0	13.83	0	1	0.215	0.0	0.0	1	0	0	B	0.5877	-3.4569999999999994			0.6223	0.039
4Y24_A	A	M	120	0	-	P09382	E	1	1	2.0	23.44	0	1	0.013	0.118	0.0	1	0	0	B	0.533	-2.3919999999999995			0.6818	0.043
4Y24_A	A	A	121	0	-	P09382	E	1	1	8.0	15.14	0	1	0.051	0.016	0.0	1	0	0	B	0.5281	-2.844			0.6446	0.006
4Y24_A	A	A	122	0	-	P09382	E	0	1	4.0	17.81	0	1	0.025	0.049	0.0	1	0	0	B	0.5243	-2.7109999999999994			0.6534	0.038
4Y24_A	A	D	123	0	-	P09382	E	0	1	76.0	36.1	0	1	0.481	0.274	0.0	1	0	0	B	0.727	-0.104			0.8673	0.509
4Y24_A	A	G	124	0	-	P09382	E	0	1	42.0	27.14	0	1	0.266	0.164	0.0	1	0	0	B	0.6366	-1.6820000000000004			0.7711	0.016
4Y24_A	A	D	125	0	-	P09382	S	0	0	59.0	28.66	1	1	0.373	0.183	0.111	0	0	1	O	0.5136	0.1689999999999999			0.8167	0.169
4Y24_A	A	F	126	0	-	P09382	E	1	0	14.0	28.9	0	1	0.089	0.186	0.0	1	0	0	B	0.5751	-3.754			0.5894	0.0
4Y24_A	A	K	127	0	-	P09382	E	1	0	153.0	41.51	0	1	0.968	0.341	0.0	1	0	0	B	0.8566	-5.869			0.5285	0.062
4Y24_A	A	I	128	0	-	P09382	E	1	0	30.0	21.71	0	1	0.19	0.097	0.0	1	0	0	B	0.5965	-7.499			0.2287	0.001
4Y24_A	A	K	129	0	-	P09382	E	0	0	144.0	37.29	0	1	0.911	0.289	0.0	1	0	0	B	0.8401	-6.9110000000000005			0.4018	0.025
4Y24_A	A	C	130	0	-	P09382	E	1	0	45.0	24.32	0	1	0.285	0.129	0.0	1	0	0	B	0.6372	-4.523			0.5483	0.033
4Y24_A	A	V	131	0	-	P09382	E	1	0	44.0	14.83	0	1	0.278	0.012	0.0	1	0	0	B	0.6134	-5.351999999999999			0.4503
4Y24_A	A	A	132	0	-	P09382	E	1	0	29.0	18.34	0	1	0.184	0.056	0.0	1	0	0	B	0.5866	-3.276			0.6372
4Y24_A	A	F	133	0	-	P09382	E	1	0	106.0	34.09	0	1	0.671	0.25	0.0	1	0	0	B	0.7783	-4.4430000000000005			0.6307
4BKE_A	A	H	3	0	-	P02768	U	0	0	200.0	37.34	3	1	1.0	0.011	0.2	0	0	1	O	0.7422	-7.438			0.2953
4BKE_A	A	K	4	0	-	P02768	U	0	0	142.0	43.02	3	1	0.71	0.109	0.2	0	0	1	O	0.6643	-7.537			0.2518
4BKE_A	A	S	5	0	-	P02768	U	0	0	1.0	58.66	3	1	0.005	0.38	0.2	0	0	1	O	0.4495	-6.648000000000001			0.2467
4BKE_A	A	E	6	0	-	P02768	H	0	0	77.0	56.7	0	1	0.385	0.346	0.0	0	1	0	H	0.6756	4.822			0.94	0.294
4BKE_A	A	V	7	0	-	P02768	H	0	0	6.0	53.58	0	1	0.03	0.292	0.0	0	1	0	H	0.5351	-5.702			0.374	0.001
4BKE_A	A	A	8	0	-	P02768	H	0	0	0.0	49.67	0	1	0.0	0.224	0.0	0	1	0	H	0.5104	-3.455			0.5838	0.014
4BKE_A	A	H	9	0	-	P02768	H	0	0	92.0	47.33	0	1	0.46	0.184	0.0	0	1	0	H	0.6737	-5.265			0.4918	0.024
4BKE_A	A	R	10	0	-	P02768	H	0	0	44.0	48.82	0	1	0.22	0.209	0.0	0	1	0	H	0.5919	-4.289			0.5474	0.238
4BKE_A	A	F	11	0	-	P02768	H	0	0	20.0	44.81	0	1	0.1	0.14	0.0	0	1	0	H	0.533	-4.8			0.4654	0.04
4BKE_A	A	K	12	0	-	P02768	H	0	0	123.0	51.74	0	1	0.615	0.26	0.0	0	1	0	H	0.7358	-7.212			0.3154	0.048
4BKE_A	A	D	13	0	-	P02768	H	0	0	68.0	49.3	0	1	0.34	0.218	0.0	0	1	0	H	0.6376	0.8330000000000002			0.8726	0.115
4BKE_A	A	L	14	0	-	P02768	H	0	0	29.0	48.8	0	1	0.145	0.209	0.0	0	1	0	H	0.5635	-6.329000000000001			0.3242	0.001
4BKE_A	A	G	15	0	-	P02768	U	0	0	32.0	46.33	1	1	0.16	0.166	0.067	0	0	1	O	0.4087	-4.484			0.4341	0.001
4BKE_A	A	E	16	0	-	P02768	H	0	0	62.0	48.86	0	1	0.31	0.21	0.0	0	1	0	H	0.6253	-0.1350000000000002			0.8385	0.035
4BKE_A	A	E	17	0	-	P02768	H	0	0	114.0	47.42	0	1	0.57	0.185	0.0	0	1	0	H	0.7103	4.832			0.9442	0.253
4BKE_A	A	N	18	0	-	P02768	H	0	0	41.0	43.06	0	1	0.205	0.11	0.0	0	1	0	H	0.5675	-5.489000000000001			0.4121	0.024
4BKE_A	A	F	19	0	-	P02768	H	0	0	13.0	38.07	0	1	0.065	0.023	0.0	0	1	0	H	0.4968	-3.868			0.5386	0.002
4BKE_A	A	K	20	0	-	P02768	H	0	0	37.0	44.43	0	1	0.185	0.133	0.0	0	1	0	H	0.5643	-5.691999999999999			0.3894	0.057
4BKE_A	A	A	21	0	-	P02768	H	0	0	6.0	39.77	0	1	0.03	0.053	0.0	0	1	0	H	0.489	-2.086			0.6842	0.001
4BKE_A	A	L	22	0	-	P02768	H	0	0	24.0	39.28	0	1	0.12	0.044	0.0	0	1	0	H	0.5222	-4.755000000000001			0.4644	0.003
4BKE_A	A	V	23	0	-	P02768	H	0	0	20.0	36.73	0	1	0.1	0.0	0.0	0	1	0	H	0.5059	-4.881			0.4432	0.001
4BKE_A	A	L	24	0	-	P02768	H	0	0	6.0	37.36	0	1	0.03	0.011	0.0	0	1	0	H	0.4809	-5.31			0.3873	0.007
4BKE_A	A	I	25	0	-	P02768	H	0	0	0.0	38.97	0	1	0.0	0.039	0.0	0	1	0	H	0.4747	-5.724			0.3431	0.002
4BKE_A	A	A	26	0	-	P02768	H	0	0	10.0	40.31	0	1	0.05	0.062	0.0	0	1	0	H	0.4985	-1.91			0.7006	0.082
4BKE_A	A	F	27	0	-	P02768	H	0	0	2.0	44.87	0	1	0.01	0.141	0.0	0	1	0	H	0.4983	-3.925			0.534	0.046
4BKE_A	A	A	28	0	-	P02768	H	0	0	0.0	44.42	0	1	0.0	0.133	0.0	0	1	0	H	0.4928	-3.876			0.5358	0.04
4BKE_A	A	Q	29	0	-	P02768	H	0	0	4.0	45.12	0	1	0.02	0.145	0.0	0	1	0	H	0.5029	-3.358			0.5887	0.174
4BKE_A	A	Y	30	0	-	P02768	H	0	0	10.0	52.0	0	1	0.05	0.264	0.0	0	1	0	H	0.5375	-4.546			0.4934	0.015
4BKE_A	A	L	31	0	-	P02768	U	0	0	2.0	55.46	5	0	0.01	0.324	0.333	0	0	1	O	0.2683	-7.221			0.1488	0.025
4BKE_A	A	Q	32	0	-	P02768	T	0	0	11.0	58.02	5	0	0.055	0.369	0.333	0	0	1	O	0.2893	-5.567			0.2788	0.005
4BKE_A	A	Q	33	0	-	P02768	T	0	0	90.0	61.28	5	0	0.45	0.425	0.333	0	0	1	O	0.4398	-7.582			0.1706	0.03
4BKE_A	A	C	34	0	-	P02768	S	0	0	6.0	57.29	5	0	0.03	0.356	0.333	0	0	1	O	0.2793	-11.96			0.0131	0.01
4BKE_A	A	P	35	0	-	P02768	U	0	0	56.0	55.85	5	0	0.28	0.331	0.333	0	0	1	O	0.3592	-8.713999999999999			0.0898	0.003
4BKE_A	A	F	36	0	-	P02768	H	0	0	23.0	53.2	0	0	0.115	0.285	0.0	0	1	0	H	0.323	-7.813000000000001			0.127	0.0
4BKE_A	A	E	37	0	-	P02768	H	0	0	118.0	58.75	0	0	0.59	0.381	0.0	0	1	0	H	0.5179	0.6950000000000001			0.8372	0.09
4BKE_A	A	D	38	0	-	P02768	H	0	0	73.0	55.53	0	0	0.365	0.326	0.0	0	1	0	H	0.4206	1.318			0.8304	0.006
4BKE_A	A	H	39	0	-	P02768	H	0	0	1.0	52.87	0	0	0.005	0.28	0.0	0	1	0	H	0.286	-5.794			0.2582	0.028
4BKE_A	A	V	40	0	-	P02768	H	0	0	48.0	50.58	0	0	0.24	0.24	0.0	0	1	0	H	0.3588	-5.924999999999999			0.2747	0.004
4BKE_A	A	K	41	0	-	P02768	H	0	0	124.0	53.64	0	0	0.62	0.293	0.0	0	1	0	H	0.5126	-5.678			0.3655	0.002
4BKE_A	A	L	42	0	-	P02768	H	0	0	16.0	47.95	0	0	0.08	0.194	0.0	0	1	0	H	0.2964	-5.188000000000001			0.3154	0.004
4BKE_A	A	V	43	0	-	P02768	H	0	0	8.0	44.98	0	0	0.04	0.143	0.0	0	1	0	H	0.2756	-5.214			0.3045	0.002
4BKE_A	A	N	44	0	-	P02768	H	0	0	82.0	47.84	0	0	0.41	0.192	0.0	0	1	0	H	0.4125	-9.438			0.0694	0.0
4BKE_A	A	E	45	0	-	P02768	H	0	0	89.0	48.3	0	0	0.445	0.2	0.0	0	1	0	H	0.4272	4.2620000000000005			0.8961	0.319
4BKE_A	A	V	46	0	-	P02768	H	0	0	21.0	45.74	0	0	0.105	0.156	0.0	0	1	0	H	0.2983	-6.130999999999999			0.2349	0.009
4BKE_A	A	T	47	0	-	P02768	H	0	0	4.0	46.28	0	0	0.02	0.165	0.0	0	1	0	H	0.2728	-7.003			0.1636	0.0
4BKE_A	A	E	48	0	-	P02768	H	0	0	120.0	53.66	0	0	0.6	0.293	0.0	0	1	0	H	0.5048	6.069000000000001			0.926	0.717
4BKE_A	A	F	49	0	-	P02768	H	0	0	49.0	49.87	0	0	0.245	0.228	0.0	0	1	0	H	0.3584	-2.777			0.5683	0.008
4BKE_A	A	A	50	0	-	P02768	H	0	0	0.0	49.93	0	0	0.0	0.229	0.0	0	1	0	H	0.2765	-3.5780000000000003			0.4565	0.001
4BKE_A	A	K	51	0	-	P02768	H	0	0	76.0	51.56	0	0	0.38	0.257	0.0	0	1	0	H	0.4133	-7.155			0.1934	0.019
4BKE_A	A	T	52	0	-	P02768	H	0	0	75.0	53.4	0	0	0.375	0.289	0.0	0	1	0	H	0.4175	-5.045000000000001			0.3831	0.002
4BKE_A	A	C	53	0	-	P02768	H	0	0	0.0	53.28	0	0	0.0	0.287	0.0	0	1	0	H	0.2856	-4.851			0.3417	0.035
4BKE_A	A	V	54	0	-	P02768	H	0	0	56.0	54.9	0	0	0.28	0.315	0.0	0	1	0	H	0.3868	-6.411999999999999			0.2434	0.001
4BKE_A	A	A	55	0	-	P02768	H	0	0	89.0	56.43	0	0	0.445	0.341	0.0	0	1	0	H	0.4541	-4.944999999999999			0.4108	0.018
4BKE_A	A	D	56	0	-	P02768	U	0	0	85.0	56.55	10	0	0.425	0.343	0.667	0	0	1	O	0.5655	-1.957			0.726	0.254
4BKE_A	A	E	57	0	-	P02768	T	0	0	70.0	63.25	10	0	0.35	0.459	0.667	0	0	1	O	0.5589	3.814			0.9136	0.756
4BKE_A	A	S	58	0	-	P02768	T	0	0	89.0	59.34	10	0	0.445	0.392	0.667	0	0	1	O	0.5824	-4.326			0.5388	0.001
4BKE_A	A	A	59	0	-	P02768	S	0	0	22.0	58.29	10	0	0.11	0.373	0.667	0	0	1	O	0.4496	-6.917			0.2241	0.0
4BKE_A	A	E	60	0	-	P02768	T	0	0	169.0	63.81	10	0	0.845	0.469	0.667	0	0	1	O	0.7337	2.4769999999999994			0.9239	0.194
4BKE_A	A	N	61	0	-	P02768	T	0	0	61.0	58.37	10	0	0.305	0.375	0.667	0	0	1	O	0.5255	-7.081			0.2381	0.005
4BKE_A	A	C	62	0	-	P02768	T	0	0	0.0	55.33	10	0	0.0	0.322	0.667	0	0	1	O	0.3983	-7.138999999999999			0.19	0.007
4BKE_A	A	D	63	0	-	P02768	T	0	0	126.0	58.02	10	0	0.63	0.369	0.667	0	0	1	O	0.6461	-1.322			0.7937	0.021
4BKE_A	A	K	64	0	-	P02768	S	0	0	76.0	58.25	10	0	0.38	0.373	0.667	0	0	1	O	0.554	-6.672			0.2866	0.005
4BKE_A	A	S	65	0	-	P02768	U	0	0	42.0	53.37	10	0	0.21	0.288	0.667	0	0	1	O	0.4718	-4.809			0.4332	0.048
4BKE_A	A	L	66	0	-	P02768	H	0	0	23.0	51.41	0	0	0.115	0.254	0.0	0	1	0	H	0.3178	-6.715			0.1963	0.0
4BKE_A	A	H	67	0	-	P02768	H	0	0	35.0	52.1	0	0	0.175	0.266	0.0	0	1	0	H	0.3404	-7.250999999999999			0.1654	0.048
4BKE_A	A	T	68	0	-	P02768	H	0	0	36.0	51.01	0	0	0.18	0.247	0.0	0	1	0	H	0.3388	-5.355			0.318	0.038
4BKE_A	A	L	69	0	-	P02768	H	0	0	28.0	51.45	0	0	0.14	0.255	0.0	0	1	0	H	0.3264	-5.6930000000000005			0.2824	0.026
4BKE_A	A	F	70	0	-	P02768	H	0	0	32.0	53.57	0	0	0.16	0.292	0.0	0	1	0	H	0.3397	-3.243			0.518	0.008
4BKE_A	A	G	71	0	-	P02768	H	0	0	1.0	52.19	0	0	0.005	0.268	0.0	0	1	0	H	0.2841	-2.503			0.556	0.002
4BKE_A	A	D	72	0	-	P02768	H	0	0	55.0	55.2	0	0	0.275	0.32	0.0	0	1	0	H	0.3859	-1.3119999999999998			0.6924	0.004
4BKE_A	A	K	73	0	-	P02768	H	0	0	55.0	58.05	0	0	0.275	0.369	0.0	0	1	0	H	0.3949	-7.614			0.1562	0.007
4BKE_A	A	L	74	0	-	P02768	H	0	0	0.0	56.75	0	0	0.0	0.347	0.0	0	1	0	H	0.2951	-6.771			0.1855	0.019
4BKE_A	A	C	75	0	-	P02768	T	0	0	38.0	57.72	5	0	0.19	0.364	0.333	0	0	1	O	0.3334	-5.2090000000000005			0.3292	0.002
4BKE_A	A	T	76	0	-	P02768	T	0	0	88.0	61.11	5	0	0.44	0.422	0.333	0	0	1	O	0.4354	-4.629			0.433	0.007
4BKE_A	A	V	77	0	-	P02768	U	0	0	22.0	63.32	5	0	0.11	0.461	0.333	0	0	1	O	0.3225	-5.999			0.2545	0.0
4BKE_A	A	A	78	0	-	P02768	T	0	0	94.0	65.65	5	0	0.47	0.501	0.333	0	0	1	O	0.462	-2.258			0.6594	0.006
4BKE_A	A	T	79	0	-	P02768	T	0	0	56.0	67.38	5	0	0.28	0.531	0.333	0	0	1	O	0.3955	-4.461			0.4299	0.008
4BKE_A	A	L	80	0	-	P02768	H	0	0	8.0	67.1	0	0	0.04	0.526	0.0	0	1	0	H	0.3385	-6.805000000000001			0.1961	0.118
4BKE_A	A	R	81	0	-	P02768	H	0	0	133.0	68.27	0	0	0.665	0.546	0.0	0	1	0	H	0.5783	-7.532			0.2192	0.005
4BKE_A	A	E	82	0	-	P02768	H	0	0	142.0	67.43	0	0	0.71	0.532	0.0	0	1	0	H	0.5926	3.728			0.918	0.742
4BKE_A	A	T	83	0	-	P02768	H	0	0	64.0	65.6	0	0	0.32	0.5	0.0	0	1	0	H	0.4365	-5.375			0.3596	0.02
4BKE_A	A	Y	84	0	-	P02768	H	0	0	34.0	65.06	0	0	0.17	0.491	0.0	0	1	0	H	0.3786	-5.845			0.2898	0.016
4BKE_A	A	G	85	0	-	P02768	G	0	0	29.0	63.4	0	0	0.145	0.462	0.0	0	1	0	H	0.3643	-3.4730000000000003			0.509	0.002
4BKE_A	A	E	86	0	-	P02768	G	0	0	141.0	64.79	0	0	0.705	0.486	0.0	0	1	0	H	0.5821	4.123			0.9209	0.541
4BKE_A	A	M	87	0	-	P02768	G	0	0	13.0	61.7	0	0	0.065	0.432	0.0	0	1	0	H	0.3309	-4.019			0.4412	0.001
4BKE_A	A	A	88	0	-	P02768	G	0	0	10.0	56.09	0	0	0.05	0.335	0.0	0	1	0	H	0.3095	-5.491			0.2935	0.005
4BKE_A	A	D	89	0	-	P02768	G	0	0	79.0	55.03	0	0	0.395	0.317	0.0	0	1	0	H	0.4303	-1.9710000000000003			0.6663	0.38
4BKE_A	A	C	90	0	-	P02768	G	0	0	0.0	53.94	0	0	0.0	0.298	0.0	0	1	0	H	0.2873	-6.271999999999999			0.22	0.012
4BKE_A	A	C	91	0	-	P02768	G	0	0	43.0	55.95	0	0	0.215	0.333	0.0	0	1	0	H	0.3664	-5.468999999999999			0.3192	0.002
4BKE_A	A	A	92	0	-	P02768	G	0	0	90.0	58.13	0	0	0.45	0.371	0.0	0	1	0	H	0.4617	-4.188000000000001			0.4898	0.017
4BKE_A	A	K	93	0	-	P02768	S	0	0	89.0	60.64	4	0	0.445	0.414	0.267	0	0	1	O	0.4065	-7.728			0.1519	0.035
4BKE_A	A	Q	94	0	-	P02768	U	0	0	148.0	65.21	4	0	0.74	0.493	0.267	0	0	1	O	0.5351	-8.064			0.1645	0.001
4BKE_A	A	E	95	0	-	P02768	T	0	0	47.0	62.23	4	0	0.235	0.442	0.267	0	0	1	O	0.3356	-0.7170000000000004			0.7088	0.184
4BKE_A	A	P	96	0	-	P02768	T	0	0	91.0	61.64	4	0	0.455	0.431	0.267	0	0	1	O	0.4134	-9.837			0.0566	0.0
4BKE_A	A	E	97	0	-	P02768	H	0	0	109.0	63.09	0	0	0.545	0.457	0.0	0	1	0	H	0.5152	2.768			0.8895	0.239
4BKE_A	A	R	98	0	-	P02768	H	0	0	21.0	53.22	0	0	0.105	0.286	0.0	0	1	0	H	0.3198	-6.697			0.1983	0.029
4BKE_A	A	N	99	0	-	P02768	H	0	0	13.0	55.85	0	0	0.065	0.331	0.0	0	1	0	H	0.3139	-11.316000000000004			0.0205	0.006
4BKE_A	A	E	100	0	-	P02768	H	0	0	70.0	59.91	0	0	0.35	0.401	0.0	0	1	0	H	0.4291	1.6939999999999995			0.8442	0.74
4BKE_A	A	C	101	0	-	P02768	H	0	0	8.0	53.57	0	0	0.04	0.292	0.0	0	1	0	H	0.2992	-5.289999999999999			0.3073	0.133
4BKE_A	A	F	102	0	-	P02768	H	0	0	4.0	53.94	0	0	0.02	0.298	0.0	0	1	0	H	0.2937	-4.732			0.3563	0.013
4BKE_A	A	L	103	0	-	P02768	H	0	0	9.0	56.35	0	0	0.045	0.34	0.0	0	1	0	H	0.3087	-7.187999999999999			0.1611	0.008
4BKE_A	A	Q	104	0	-	P02768	H	0	0	136.0	60.76	0	0	0.68	0.416	0.0	0	1	0	H	0.5594	-2.8030000000000004			0.6627	0.034
4BKE_A	A	H	105	0	-	P02768	T	0	0	56.0	64.39	15	0	0.28	0.479	1.0	0	0	1	O	0.6791	-6.063			0.4091	0.005
4BKE_A	A	K	106	0	-	P02768	U	0	0	9.0	66.07	15	0	0.045	0.508	1.0	0	0	1	O	0.6004	-7.457			0.2338	0.023
4BKE_A	A	D	107	0	-	P02768	U	0	0	83.0	70.44	15	0	0.415	0.584	1.0	0	0	1	O	0.739	-0.364			0.862	0.196
4BKE_A	A	D	108	0	-	P02768	S	0	0	74.0	73.16	15	0	0.37	0.631	1.0	0	0	1	O	0.7325	-1.636			0.8081	0.222
4BKE_A	A	N	109	0	-	P02768	S	0	0	107.0	73.78	15	0	0.535	0.642	1.0	0	0	1	O	0.7811	-12.592000000000002			0.0247	0.001
4BKE_A	A	P	110	0	-	P02768	U	0	0	22.0	68.85	15	0	0.11	0.556	1.0	0	0	1	O	0.6331	-7.869999999999998			0.2107	0.004
4BKE_A	A	N	111	0	-	P02768	S	0	0	153.0	68.39	15	0	0.765	0.548	1.0	0	0	1	O	0.8258	-9.561			0.1443	0.008
4BKE_A	A	L	112	0	-	P02768	U	0	0	32.0	59.92	15	0	0.16	0.402	1.0	0	0	1	O	0.6234	-13.682000000000002			0.0087	0.0
4BKE_A	A	P	113	0	-	P02768	U	0	0	95.0	58.88	15	0	0.475	0.384	1.0	0	0	1	O	0.7269	-7.782999999999999			0.2548	0.004
4BKE_A	A	R	114	0	-	P02768	U	0	0	197.0	59.1	15	0	0.985	0.387	1.0	0	0	1	O	0.8549	-4.077			0.7011	0.021
4BKE_A	A	L	115	0	-	P02768	U	0	0	55.0	58.35	15	0	0.275	0.374	1.0	0	0	1	O	0.6595	-8.350000000000001			0.1815	0.001
4BKE_A	A	V	116	0	-	P02768	U	0	0	92.0	59.9	15	0	0.46	0.401	1.0	0	0	1	O	0.7249	-9.191			0.1412	0.002
4BKE_A	A	R	117	0	-	P02768	U	0	0	98.0	61.45	15	0	0.49	0.428	1.0	0	0	1	O	0.7382	-9.8			0.1083	0.004
4BKE_A	A	P	118	0	-	P02768	U	0	0	43.0	58.95	15	0	0.215	0.385	1.0	0	0	1	O	0.6402	-9.773			0.0906	0.002
4BKE_A	A	E	119	0	-	P02768	U	0	0	149.0	62.4	15	0	0.745	0.445	1.0	0	0	1	O	0.8093	3.616			0.9464	0.588
4BKE_A	A	V	120	0	-	P02768	H	0	0	17.0	55.83	0	0	0.085	0.331	0.0	0	1	0	H	0.3206	-7.656000000000001			0.1354	0.0
4BKE_A	A	D	121	0	-	P02768	H	0	0	99.0	54.94	0	0	0.495	0.315	0.0	0	1	0	H	0.4684	0.2189999999999998			0.8044	0.048
4BKE_A	A	V	122	0	-	P02768	H	0	0	89.0	51.86	0	0	0.445	0.262	0.0	0	1	0	H	0.439	-5.567			0.3421	0.003
4BKE_A	A	M	123	0	-	P02768	H	0	0	8.0	52.88	0	0	0.04	0.28	0.0	0	1	0	H	0.2973	-4.8180000000000005			0.3498	0.022
4BKE_A	A	C	124	0	-	P02768	H	0	0	9.0	53.15	0	0	0.045	0.284	0.0	0	1	0	H	0.2995	-5.709999999999999			0.2704	0.034
4BKE_A	A	T	125	0	-	P02768	H	0	0	84.0	52.41	0	0	0.42	0.272	0.0	0	1	0	H	0.4313	-4.835			0.4105	0.044
4BKE_A	A	A	126	0	-	P02768	H	0	0	42.0	54.36	0	0	0.21	0.305	0.0	0	1	0	H	0.3596	-3.755			0.4803	0.023
4BKE_A	A	F	127	0	-	P02768	H	0	0	18.0	57.57	0	0	0.09	0.361	0.0	0	1	0	H	0.3274	-4.409			0.4023	0.018
4BKE_A	A	H	128	0	-	P02768	H	0	0	153.0	61.18	0	0	0.765	0.423	0.0	0	1	0	H	0.5929	-8.137			0.1765	0.005
4BKE_A	A	D	129	0	-	P02768	H	0	0	121.0	62.99	0	0	0.605	0.455	0.0	0	1	0	H	0.538	-1.544			0.7406	0.439
4BKE_A	A	N	130	0	-	P02768	U	0	0	79.0	66.46	1	0	0.395	0.515	0.067	0	0	1	O	0.3225	-9.968			0.0445	0.011
4BKE_A	A	E	131	0	-	P02768	H	0	0	82.0	66.66	0	0	0.41	0.518	0.0	0	1	0	H	0.4746	0.9069999999999998			0.8321	0.09
4BKE_A	A	E	132	0	-	P02768	H	0	0	89.0	65.44	0	0	0.445	0.497	0.0	0	1	0	H	0.4841	4.074			0.904	0.417
4BKE_A	A	T	133	0	-	P02768	H	0	0	68.0	60.54	0	0	0.34	0.412	0.0	0	1	0	H	0.4274	-3.028			0.5803	0.038
4BKE_A	A	F	134	0	-	P02768	H	0	0	18.0	55.88	0	0	0.09	0.332	0.0	0	1	0	H	0.3225	-2.751			0.5532	0.001
4BKE_A	A	L	135	0	-	P02768	H	0	0	40.0	52.55	0	0	0.2	0.274	0.0	0	1	0	H	0.3506	-6.412			0.2305	0.001
4BKE_A	A	K	136	0	-	P02768	H	0	0	25.0	51.79	0	0	0.125	0.261	0.0	0	1	0	H	0.3223	-6.132			0.2433	0.003
4BKE_A	A	K	137	0	-	P02768	H	0	0	61.0	42.98	0	0	0.305	0.108	0.0	0	1	0	H	0.3585	-6.62			0.2166	0.002
4BKE_A	A	Y	138	0	-	P02768	H	0	0	75.0	51.99	0	0	0.375	0.264	0.0	0	1	0	H	0.4128	-4.622			0.4226	0.008
4BKE_A	A	L	139	0	-	P02768	H	0	0	13.0	43.67	0	0	0.065	0.12	0.0	0	1	0	H	0.2798	-6.189000000000001			0.224	0.02
4BKE_A	A	Y	140	0	-	P02768	H	0	0	7.0	44.54	0	0	0.035	0.135	0.0	0	1	0	H	0.2728	-7.925999999999999			0.111	4.799
4BKE_A	A	E	141	0	-	P02768	H	0	0	29.0	45.47	0	0	0.145	0.151	0.0	0	1	0	H	0.3107	5.613			0.8902	0.71
4BKE_A	A	I	142	0	-	P02768	H	0	0	59.0	43.96	0	0	0.295	0.125	0.0	0	1	0	H	0.358	-6.49			0.2268	0.005
4BKE_A	A	A	143	0	-	P02768	H	0	0	0.0	43.5	0	0	0.0	0.117	0.0	0	1	0	H	0.2595	-3.301			0.4739	0.006
4BKE_A	A	R	144	0	-	P02768	H	0	0	25.0	48.54	0	0	0.125	0.205	0.0	0	1	0	H	0.313	-4.768			0.3615	0.205
4BKE_A	A	R	145	0	-	P02768	H	0	0	41.0	47.02	0	0	0.205	0.178	0.0	0	1	0	H	0.3356	-8.086			0.1151	0.027
4BKE_A	A	H	146	0	-	P02768	U	0	0	54.0	49.88	5	0	0.27	0.228	0.333	0	0	1	O	0.3376	-12.921			0.008	0.469
4BKE_A	A	P	147	0	-	P02768	T	0	0	5.0	49.1	5	0	0.025	0.214	0.333	0	0	1	O	0.2563	-10.519			0.0291	0.083
4BKE_A	A	Y	148	0	-	P02768	T	0	0	90.0	54.36	5	0	0.45	0.305	0.333	0	0	1	O	0.417	-5.641000000000001			0.3251	0.019
4BKE_A	A	F	149	0	-	P02768	S	0	0	11.0	48.5	5	0	0.055	0.204	0.333	0	0	1	O	0.2638	-6.448			0.1993	0.035
4BKE_A	A	Y	150	0	-	P02768	U	0	0	28.0	47.07	5	0	0.14	0.179	0.333	0	0	1	O	0.2862	-8.663			0.0808	0.002
4BKE_A	A	A	151	0	-	P02768	H	0	0	0.0	44.51	0	0	0.0	0.135	0.0	0	1	0	H	0.2622	-8.611			0.0794	0.002
4BKE_A	A	P	152	0	-	P02768	H	0	0	7.0	44.84	0	0	0.035	0.14	0.0	0	1	0	H	0.2736	-10.692000000000002			0.0273	0.002
4BKE_A	A	E	153	0	-	P02768	H	0	0	26.0	48.54	0	0	0.13	0.205	0.0	0	1	0	H	0.3146	3.673			0.8631	0.939
4BKE_A	A	L	154	0	-	P02768	H	0	0	9.0	49.41	0	0	0.045	0.22	0.0	0	1	0	H	0.2893	-7.757			0.1229	0.006
4BKE_A	A	L	155	0	-	P02768	H	0	0	8.0	48.3	0	0	0.04	0.2	0.0	0	1	0	H	0.2845	-5.620000000000001			0.2724	0.009
4BKE_A	A	F	156	0	-	P02768	H	0	0	22.0	49.85	0	0	0.11	0.227	0.0	0	1	0	H	0.3116	-2.6920000000000006			0.5531	0.002
4BKE_A	A	F	157	0	-	P02768	H	0	0	17.0	51.61	0	0	0.085	0.258	0.0	0	1	0	H	0.3084	-3.351			0.4928	0.001
4BKE_A	A	A	158	0	-	P02768	H	0	0	26.0	52.95	0	0	0.13	0.281	0.0	0	1	0	H	0.3274	-3.962			0.4449	0.001
4BKE_A	A	K	159	0	-	P02768	H	0	0	86.0	56.68	0	0	0.43	0.346	0.0	0	1	0	H	0.4492	-5.556			0.3478	0.004
4BKE_A	A	R	160	0	-	P02768	H	0	0	105.0	59.24	0	0	0.525	0.39	0.0	0	1	0	H	0.4945	-3.302			0.5894	0.022
4BKE_A	A	Y	161	0	-	P02768	H	0	0	64.0	55.77	0	0	0.32	0.33	0.0	0	1	0	H	0.4045	-4.182			0.4616	0.019
4BKE_A	A	K	162	0	-	P02768	H	0	0	95.0	61.52	0	0	0.475	0.429	0.0	0	1	0	H	0.4826	-5.600999999999999			0.3589	0.057
4BKE_A	A	A	163	0	-	P02768	H	0	0	56.0	60.29	0	0	0.28	0.408	0.0	0	1	0	H	0.404	-1.986			0.6533	0.019
4BKE_A	A	A	164	0	-	P02768	H	0	0	3.0	61.19	0	0	0.015	0.424	0.0	0	1	0	H	0.3126	-2.639			0.5581	0.021
4BKE_A	A	F	165	0	-	P02768	H	0	0	8.0	62.56	0	0	0.04	0.447	0.0	0	1	0	H	0.3249	-5.384			0.3095	0.004
4BKE_A	A	T	166	0	-	P02768	H	0	0	69.0	63.77	0	0	0.345	0.468	0.0	0	1	0	H	0.4399	-9.459			0.0723	0.0
4BKE_A	A	E	167	0	-	P02768	H	0	0	119.0	67.41	0	0	0.595	0.531	0.0	0	1	0	H	0.5487	1.5809999999999995			0.8711	0.621
4BKE_A	A	C	168	0	-	P02768	H	0	0	0.0	67.64	0	0	0.0	0.535	0.0	0	1	0	H	0.3262	-6.849			0.1891	0.01
4BKE_A	A	C	169	0	-	P02768	H	0	0	17.0	66.16	0	0	0.085	0.51	0.0	0	1	0	H	0.3515	-6.726999999999999			0.206	0.044
4BKE_A	A	Q	170	0	-	P02768	T	0	0	162.0	73.17	4	0	0.81	0.631	0.267	0	0	1	O	0.5881	-3.2909999999999995			0.6367	0.025
4BKE_A	A	A	171	0	-	P02768	S	0	0	31.0	72.43	4	0	0.155	0.618	0.267	0	0	1	O	0.3382	-1.7359999999999998			0.642	0.034
4BKE_A	A	A	172	0	-	P02768	S	0	0	111.0	73.58	4	0	0.555	0.638	0.267	0	0	1	O	0.4914	-2.4969999999999994			0.6548	0.013
4BKE_A	A	D	173	0	-	P02768	S	0	0	106.0	75.08	4	0	0.53	0.664	0.267	0	0	1	O	0.4867	1.396			0.8508	0.045
4BKE_A	A	K	174	0	-	P02768	H	0	0	63.0	72.56	0	0	0.315	0.621	0.0	0	1	0	H	0.4577	-5.643			0.3432	0.077
4BKE_A	A	A	175	0	-	P02768	H	0	0	40.0	71.37	0	0	0.2	0.6	0.0	0	1	0	H	0.4099	-2.799			0.5914	0.011
4BKE_A	A	A	176	0	-	P02768	H	0	0	62.0	70.18	0	0	0.31	0.579	0.0	0	1	0	H	0.4477	-3.711			0.5285	0.047
4BKE_A	A	C	177	0	-	P02768	H	0	0	29.0	68.85	0	0	0.145	0.556	0.0	0	1	0	H	0.3813	-6.094999999999999			0.2686	0.089
4BKE_A	A	L	178	0	-	P02768	H	0	0	0.0	67.44	0	0	0.0	0.532	0.0	0	1	0	H	0.3257	-8.247			0.1052	0.002
4BKE_A	A	L	179	0	-	P02768	H	0	0	59.0	66.77	0	0	0.295	0.52	0.0	0	1	0	H	0.4307	-11.380000000000004			0.0248	0.0
4BKE_A	A	P	180	0	-	P02768	H	0	0	71.0	65.68	0	0	0.355	0.501	0.0	0	1	0	H	0.4501	-7.082			0.211	0.028
4BKE_A	A	K	181	0	-	P02768	H	0	0	60.0	66.08	0	0	0.3	0.508	0.0	0	1	0	H	0.4304	-6.720999999999999			0.2335	0.017
4BKE_A	A	L	182	0	-	P02768	H	0	0	8.0	63.22	0	0	0.04	0.459	0.0	0	1	0	H	0.327	-8.494000000000002			0.0941	9.9
4BKE_A	A	D	183	0	-	P02768	H	0	0	57.0	63.99	0	0	0.285	0.472	0.0	0	1	0	H	0.4179	-1.3290000000000002			0.7048	0.04
4BKE_A	A	E	184	0	-	P02768	H	0	0	118.0	62.84	0	0	0.59	0.452	0.0	0	1	0	H	0.5316	4.242			0.9142	0.325
4BKE_A	A	L	185	0	-	P02768	H	0	0	9.0	61.29	0	0	0.045	0.425	0.0	0	1	0	H	0.3229	-6.359			0.2252	0.0
4BKE_A	A	R	186	0	-	P02768	H	0	0	87.0	66.0	0	0	0.435	0.507	0.0	0	1	0	H	0.4821	-5.1080000000000005			0.4082	0.013
4BKE_A	A	D	187	0	-	P02768	H	0	0	61.0	63.07	0	0	0.305	0.456	0.0	0	1	0	H	0.4224	-1.392			0.7026	0.011
4BKE_A	A	E	188	0	-	P02768	H	0	0	67.0	61.85	0	0	0.335	0.435	0.0	0	1	0	H	0.4299	4.587999999999999			0.9008	0.573
4BKE_A	A	G	189	0	-	P02768	H	0	0	17.0	58.26	0	0	0.085	0.373	0.0	0	1	0	H	0.3277	-1.1440000000000006			0.6787	0.003
4BKE_A	A	K	190	0	-	P02768	H	0	0	111.0	61.23	0	0	0.555	0.424	0.0	0	1	0	H	0.5127	-7.54			0.196	0.037
4BKE_A	A	A	191	0	-	P02768	H	0	0	31.0	56.53	0	0	0.155	0.343	0.0	0	1	0	H	0.3468	-3.207			0.5247	0.001
4BKE_A	A	S	192	0	-	P02768	H	0	0	16.0	56.17	0	0	0.08	0.337	0.0	0	1	0	H	0.3199	-3.4500000000000006			0.4893	0.022
4BKE_A	A	S	193	0	-	P02768	H	0	0	5.0	56.84	0	0	0.025	0.348	0.0	0	1	0	H	0.3034	-4.22			0.409	0.0
4BKE_A	A	A	194	0	-	P02768	H	0	0	8.0	57.91	0	0	0.04	0.367	0.0	0	1	0	H	0.3115	-3.5380000000000007			0.4771	0.01
4BKE_A	A	K	195	0	-	P02768	H	0	0	74.0	61.67	0	0	0.37	0.432	0.0	0	1	0	H	0.4427	-7.596999999999999			0.1704	0.041
4BKE_A	A	Q	196	0	-	P02768	H	0	0	47.0	60.86	0	0	0.235	0.418	0.0	0	1	0	H	0.3892	-1.6780000000000004			0.6689	0.019
4BKE_A	A	R	197	0	-	P02768	H	0	0	107.0	65.37	0	0	0.535	0.496	0.0	0	1	0	H	0.5188	-3.649			0.5704	0.06
4BKE_A	A	L	198	0	-	P02768	H	0	0	22.0	59.45	0	0	0.11	0.393	0.0	0	1	0	H	0.3398	-7.010000000000001			0.1817	0.001
4BKE_A	A	K	199	0	-	P02768	H	0	0	76.0	59.89	0	0	0.38	0.401	0.0	0	1	0	H	0.4406	-7.837			0.1538	0.052
4BKE_A	A	C	200	0	-	P02768	H	0	0	32.0	55.14	0	0	0.16	0.319	0.0	0	1	0	H	0.3444	-5.781999999999999			0.2817	0.014
[truncated: 6,107 more rows]
